# Supplementary material
Source: PubMed Central journal article supplement (PMC9974915)
Supplement: NIHMS1864675-supplement-supinfo.pdf [file NIHMS1864675-supplement-supinfo.pdf]

## Supporting Information for

# Designed iron catalysts for allylic C–H functionalization of propylene and simple terminal olefins

Ruihan Wang<sup>#</sup>, Yidong Wang<sup>#</sup>, Ruiqi Ding, Parker Staub, Christopher Z. Zhao, Peng Liu\* and Yi-Ming Wang\*

*Department of Chemistry, University of Pittsburgh, Pittsburgh, Pennsylvania 15260, United States*

*E-mail: ym.wang@pitt.edu, pengliu@pitt.edu*

## Table of Contents

|                                                                                |     |
|--------------------------------------------------------------------------------|-----|
| General Information.....                                                       | 2   |
| Optimization of reaction conditions.....                                       | 3   |
| General procedure A for functionalization of allylic C–H bonds.....            | 5   |
| Characterization data for products .....                                       | 7   |
| Unsuccessful substrates .....                                                  | 28  |
| Synthesis and characterization data of iron complexes .....                    | 29  |
| Synthetic applications of the products .....                                   | 45  |
| Kinetic isotope effect experiments.....                                        | 50  |
| Stoichiometric experiments .....                                               | 52  |
| Characterization data for Fp <sup>X</sup> -alkene complexes.....               | 54  |
| DFT calculations.....                                                          | 59  |
| Procedures for substrate synthesis and characterization data .....             | 65  |
| X-ray structure of complex <b>Fp<sup>W3</sup>I</b> and product <b>5k</b> ..... | 75  |
| Pressure vessels and gas introducing procedure .....                           | 77  |
| References.....                                                                | 79  |
| NMR spectra.....                                                               | 82  |
| Cartesian Coordinates (Å) and Energies of the Optimized Structures .....       | 203 |

## General Information

**General Reagent Information:** Anhydrous tetrahydrofuran (THF, Acros, AcroSeal packaging), toluene (Aldrich, Sure/Seal packaging), trifluorotoluene (Frontier Scientific, J&KSeal packaging), *p*-xylene (Acros, AcroSeal packaging) and 1,2-dichloroethane (DCE, Aldrich, Sure/Seal packaging) were obtained from commercial suppliers and were deoxygenated by sparging with nitrogen, transferred into an argon-filled glovebox, and used without further purification. Other dry solvents were obtained by distillation and storage over 3Å or 4Å molecular sieves. Propylene was purchased from Sigma Aldrich (CAS: 115-07-1, ≥99% purity). Boron trifluoride etherate was purchased from Sigma Aldrich. 2,2,6,6-Tetramethylpiperidine (TMPH) was purchased from Chem-Impex Int'l. Inc. and was redistilled and obtained as a pale yellow liquid before use. Silver tetrafluoroborate was purchased from Strem and was stored in the glovebox protected from light. (*Note:* Silver tetrafluoroborate used for catalyst synthesis should be a white free-flowing solid. The use of greyish discolored AgBF<sub>4</sub> resulted in catalyst of inferior reactivity.) All other reagents were purchased from TCI, Acros, Alfa Aesar, Sigma Aldrich or Combi-Blocks and were used as received. Compounds were purified by flash column chromatography using SiliCycle *SiliaFlash*® F60 silica gel, unless otherwise indicated.

**General Analytical Information:** New compounds were characterized by <sup>1</sup>H NMR, <sup>13</sup>C NMR, HRMS, and, where appropriate, other analytical techniques as indicated. Copies of the <sup>1</sup>H NMR and <sup>13</sup>C NMR spectra can be found at the end of the Supporting Information. <sup>1</sup>H, <sup>19</sup>F and <sup>13</sup>C NMR spectra were recorded on Bruker 300 MHz, 400 MHz or 500 MHz instruments. All <sup>1</sup>H NMR data are reported in δ units, parts per million (ppm), and were measured relative to the residual proton signal in the deuterated solvent at 7.26 ppm (CDCl<sub>3</sub>) or 1.94 ppm (CD<sub>3</sub>CN). All <sup>13</sup>C NMR spectra are <sup>1</sup>H decoupled and reported in ppm relative to the solvent signal at 77.16 ppm (CDCl<sub>3</sub>) or 1.32/118.26 ppm (CD<sub>3</sub>CN). Unless otherwise stated, 2,4-dinitrotoluene was used as the internal standard for yields determined by <sup>1</sup>H NMR. High resolution mass spectra were obtained on a Bruker Daltonics, Inc. APEXIII 7.0 TESLA FTMS instrument (ESI) or Waters Micromass GCT Premier instrument (EI). Thin-layer chromatography (TLC) was performed on Silicycle 250 μm (analytical) or 1000 μm (preparative) silica gel plates. Compounds were visualized by irradiation with UV light, or by staining with iodine/silica gel, potassium permanganate, or phosphomolybdic acid (PMA). Yields refer to isolated compounds, unless otherwise indicated.

## Optimization of reaction conditions

### 1. Conditions of propylene functionalization

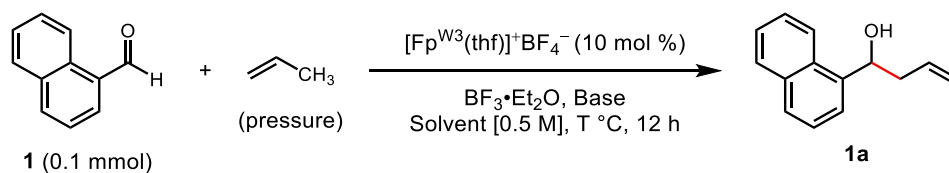

| Entry    | Pressure (atm) | Base                  | Acid/base  | Solvent           | Temperature (°C) | Yield (%) <sup>a</sup> |
|----------|----------------|-----------------------|------------|-------------------|------------------|------------------------|
| 1        | 8              | <i>sym</i> -collidine | 2.5/3      | Toluene           | 80               | 0                      |
| 2        | 8              | 2,6-lutidine          | 2.5/3      | Toluene           | 80               | 0                      |
| 3        | 8              | TMPH                  | 1.5/2      | Toluene           | 80               | 37                     |
| 4        | 8              | TMPH                  | 2.5/3      | Toluene           | 80               | 84                     |
| 5        | 8              | TMPH                  | 2.5/2      | Toluene           | 80               | 48                     |
| 6        | 8              | TMPH                  | 2/4        | Toluene           | 80               | 78                     |
| <b>7</b> | <b>8</b>       | <b>TMPH</b>           | <b>2/2</b> | <b>Toluene</b>    | <b>80</b>        | <b>87</b>              |
| 8        | 8              | TMPH                  | 2/2        | PhCF <sub>3</sub> | 80               | 80                     |
| 9        | 8              | TMPH                  | 2/2        | DCE               | 80               | 76                     |
| 10       | 8              | TMPH                  | 2/2        | <i>p</i> -xylene  | 80               | 81                     |
| 11       | 8              | TMPH                  | 2/2        | Toluene           | 60               | 85                     |
| 12       | 8              | TMPH                  | 2/2        | Toluene           | 100              | 49                     |
| 13       | 1              | TMPH                  | 2/2        | Toluene           | 80               | 64                     |
| 14       | 5              | TMPH                  | 2/2        | Toluene           | 80               | 79                     |

<sup>a</sup>Yields were determined by <sup>1</sup>H NMR using 2,4-dinitrotoluene as the internal standard.

### 2. Conditions of allylic functionalization of higher olefins

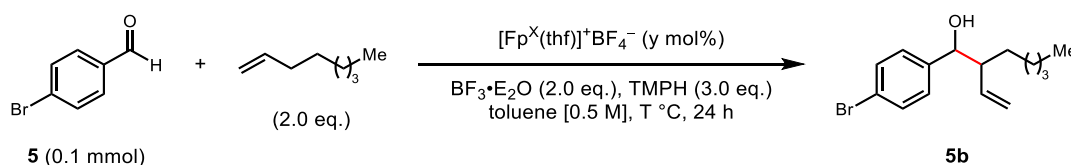

| Entry | Iron catalyst                         | Catalyst loading | Temperature (°C) | Yield (%) <sup>a</sup> | d.r.  |
|-------|---------------------------------------|------------------|------------------|------------------------|-------|
| 1     | Fp*(thf)BF <sub>4</sub>               | 10 mol %         | 80               | 36                     | 2.0:1 |
| 2     | Fp*(thf)BF <sub>4</sub>               | 10 mol %         | 45               | 6                      | 1.7:1 |
| 3     | Fp <sup>W3</sup> (thf)BF <sub>4</sub> | 5 mol %          | 50               | 90                     | 4.0:1 |
| 4     | Fp <sup>W3</sup> (thf)BF <sub>4</sub> | 5 mol %          | 45               | 95                     | 4.3:1 |
| 5     | Fp <sup>W3</sup> (thf)BF <sub>4</sub> | 5 mol %          | 42               | 79                     | 4.6:1 |
| 6     | Fp <sup>W2</sup> (thf)BF <sub>4</sub> | 5 mol %          | 45               | 16                     | 4.1:1 |
| 7     | Fp <sup>W5</sup> (thf)BF <sub>4</sub> | 5 mol %          | 45               | 95                     | 4.8:1 |
| 8     | Fp <sup>W6</sup> (thf)BF <sub>4</sub> | 5 mol %          | 45               | 95                     | 3.4:1 |

<sup>a</sup>Yields were determined by <sup>1</sup>H NMR using 2,4-dinitrotoluene as the internal standard.

### Catalysts listed in the tables

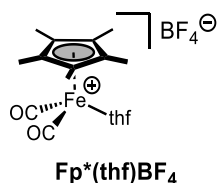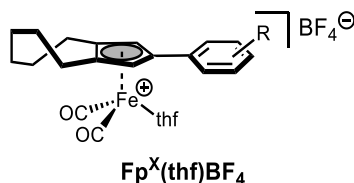

Fp<sup>W2</sup>: R = H  
 Fp<sup>W3</sup>: R = 4-OMe  
 Fp<sup>W5</sup>: R = 3,5-Me, 4-OMe  
 Fp<sup>W6</sup>: R = 2-Me, 4-OMe

### 3. Control experiments

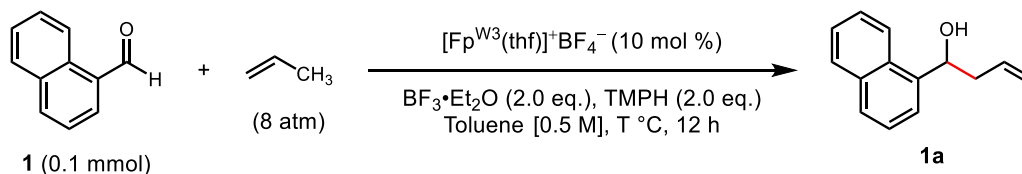

| Entry | Catalyst | BF <sub>3</sub> ·Et <sub>2</sub> O | TMPH | Temperature (°C) | Yield |
|-------|----------|------------------------------------|------|------------------|-------|
| 1     |          | ✓                                  | ✓    | 80               | N.P.  |
| 2     |          | ✓                                  | ✓    | 22               | N.P.  |
| 3     |          | ✓                                  |      | 80               | N.P.  |
| 4     | ✓        |                                    |      | 80               | N.P.  |
| 5     | ✓        | ✓                                  |      | 80               | N.P.  |
| 6     |          | ✓                                  |      | 80               | N.P.  |

### 4. Testing possibility for the ene reaction

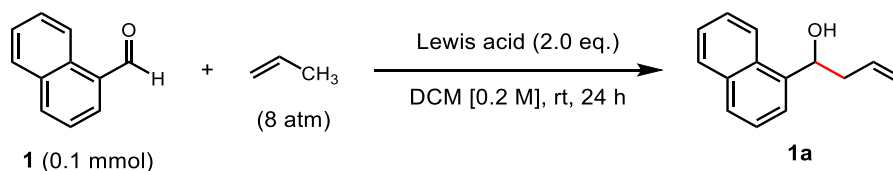

| Entry | Lewis acid                         | yield |
|-------|------------------------------------|-------|
| 1     | BF <sub>3</sub> ·Et <sub>2</sub> O | N.P.  |
| 2     | AlCl <sub>3</sub>                  | N.P.  |

**Note for experiments 3 and 4:** Given the presence of Lewis acid, we wondered if our product could be generated through an ene reaction pathway, since double bond migration would not be apparent in the case of propylene as a substrate. This possibility was ruled out by a series of control experiments showing that the reaction could not occur in the absence of either the catalyst or the base. When the substrates were subjected to the conditions of classical ene reactions, no detectable amount of product was observed, indicating that the homoallylic alcohol products obtained from propylene by our approach are not easily accessible by the ene reaction. Thus, the role of iron catalyst is indispensable in this allylic functionalization process.

## General procedure A for functionalization of allylic C–H bonds

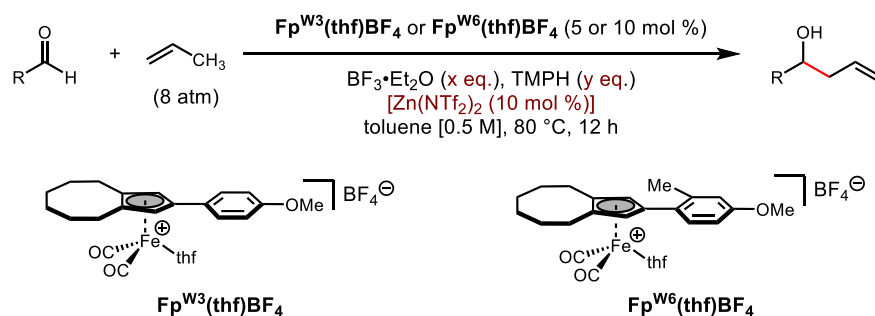

**Conditions A1:** To an oven-dried pressure tube (102 mm × 13 mm, Ace glass, part# 8648-61) charged with a magnetic stir bar,  $\text{Fp}^{\text{W}3}(\text{thf})\text{BF}_4$  (5.2 mg or 10.4 mg, 5 or 10 mol %) or  $\text{Fp}^{\text{W}6}(\text{thf})\text{BF}_4$  (10.8 mg, 10 mol %), aldehyde (0.2 mmol, 1.0 equiv), dry toluene (0.4 mL),  $\text{BF}_3 \cdot \text{Et}_2\text{O}$  (49  $\mu\text{L}$ , 0.4 mmol, 2.0 equiv), TMPH (68  $\mu\text{L}$ , 0.4 mmol, 2.0 equiv) were added in succession in an argon-filled glovebox. The tube was capped with a PTFE bushing with plunger valve (#7 Ace-Thred) and was cooled in liquid nitrogen. After the whole reaction mixture was frozen, the tube was placed under vacuum. Propylene (27 mL, 5.5 equiv, 8 atm at 80 °C, initial pressure) was condensed into the vacuum tube through the plunger valve, then the tube was resealed and taken out of liquid nitrogen. Details of introducing propylene gas are elaborated on page S76. After warming up to room temperature, the tube was heated at 80 °C for 12 h with vigorous stirring. The crude mixture was concentrated *in vacuo* and purified by flash column chromatography on silica gel to obtain the desired products.

**Conditions A2:** To an oven-dried pressure tube (102 mm × 13 mm, Ace glass, part# 8648-61) charged with a magnetic stir bar,  $\text{Fp}^{\text{W}3}(\text{thf})\text{BF}_4$  (10.4 mg, 10 mol %), aldehyde (0.2 mmol, 1.0 equiv),  $\text{Zn(NTf}_2)_2$  (12.5 mg, 0.02 mmol, 10 mol %), dry toluene (0.4 mL),  $\text{BF}_3 \cdot \text{Et}_2\text{O}$  (49  $\mu\text{L}$ , 0.4 mmol, 2.0 equiv), TMPH (101  $\mu\text{L}$ , 0.6 mmol, 3.0 equiv) were added in succession in an argon-filled glovebox. The tube was capped with a PTFE bushing with plunger valve (#7 Ace-Thred) and was cooled in liquid nitrogen. After the whole reaction mixture was frozen, the tube was placed under vacuum. Propylene (27 mL, 5.5 equiv, 8 atm at 80 °C, initial pressure) was condensed into the vacuum tube through the plunger valve, then the tube was resealed and taken out of liquid nitrogen. Details of introducing propylene gas are elaborated on page S76. After warming up to room temperature, the tube was heated at 80 °C for 12 h with vigorous stirring. The crude mixture was concentrated *in vacuo* and purified by flash column chromatography on silica gel to obtain the desired products.

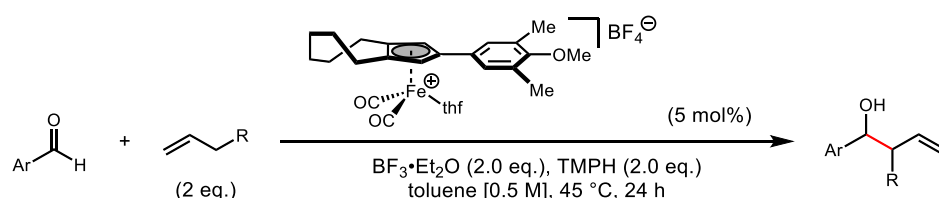

**Conditions A3:** To a flame-dried reaction tube (100 mm × 13 mm, Fisherbrand, part# 14-959-35C) charged with a magnetic stir bar,  $\text{Fp}^{\text{W}5}(\text{thf})\text{BF}_4$  (5.5 mg, 5 mol %), aldehyde (0.2 mmol, 1.0 equiv), alkene (0.4 mmol, 2.0 equiv), dry toluene (0.4 mL),  $\text{BF}_3 \cdot \text{Et}_2\text{O}$  (49  $\mu\text{L}$ , 0.4 mmol, 2.0 equiv), TMPH (101  $\mu\text{L}$ , 0.6 mmol, 3.0 equiv) were

added in succession in an argon-filled glovebox. The tube was capped with a Teflon/silicone septum (Thermo/National part# C4015-66A) screw cap and placed in an oil bath preheated at 45 °C with vigorous stirring. (Temperature must be controlled steadily at 45 °C during the course of the reaction.) After 24 h, the tube was allowed to cool to room temperature. The crude mixture was concentrated *in vacuo* and purified by flash column chromatography on silica gel to obtain the desired products.

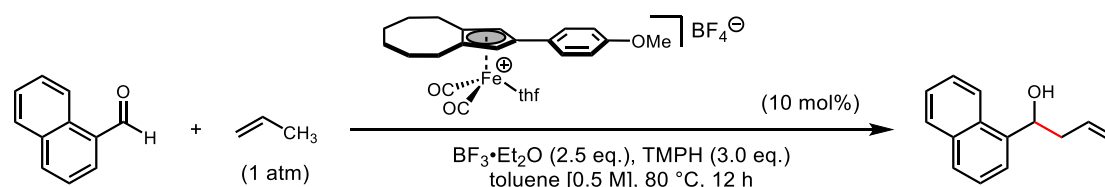

**Conditions A4 (Scheme 3a–Initial results):** To an oven-dried Schlenk flask (10 mL, Synthware, item# F490010) charged with a magnetic stir bar,  $\text{Fp}^{\text{W}3}(\text{thf})\text{BF}_4$  (10.4 mg, 10 mol %), 1-naphthaldehyde (31 mg, 0.2 mmol, 1.0 equiv), dry toluene (0.4 mL),  $\text{BF}_3 \cdot \text{Et}_2\text{O}$  (62  $\mu\text{L}$ , 0.5 mmol, 2.5 equiv), TMPH (101  $\mu\text{L}$ , 0.6 mmol, 3.0 equiv) were added in succession in an argon-filled glovebox. The flask was sealed with a knob and was cooled in liquid nitrogen. After the whole reaction mixture was frozen, the flask was placed under vacuum for 10 min. The flask was resealed under vacuum and a balloon of propylene gas was attached to the side arm. The liquid nitrogen was removed and the knob was opened to allow propylene to fill the flask. After warming up to room temperature, the flask was heated at 80 °C for 12 h with vigorous stirring. The yield (4%) was determined by crude NMR using 2,4-dinitrotoluene as the internal standard.

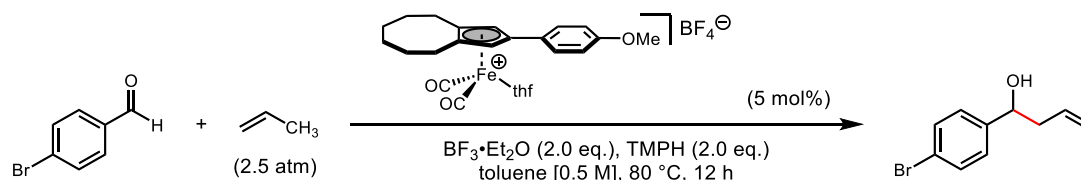

**Conditions A5 (Scheme 4a–Large-scale reaction):** To an oven-dried Schlenk flask (100 mL, Chemglass, item# AF-0094-02) charged with a magnetic stir bar,  $\text{Fp}^{\text{W}3}(\text{thf})\text{BF}_4$  (79 mg, 5 mol %), 4-bromobenzaldehyde (555 mg, 3.0 mmol, 1.0 equiv), dry toluene (6 mL),  $\text{BF}_3 \cdot \text{Et}_2\text{O}$  (740  $\mu\text{L}$ , 6.0 mmol, 2.0 equiv), TMPH (1.0 mL, 6.0 mmol, 2.0 equiv) were added in succession in an argon-filled glovebox. The flask was sealed with a knob and was cooled in liquid nitrogen. After the whole reaction mixture was frozen, the flask was placed under vacuum for 10 min. Then propylene gas (207 mL, 2.9 equiv, 2.5 atm at 80 °C, initial pressure) was condensed into the flask through the side arm from a plastic syringe. The liquid nitrogen was removed and the flask was resealed. After warming up to room temperature, the flask was heated at 80 °C for 12 h with vigorous stirring. The crude mixture was concentrated *in vacuo* and purified by flash column chromatography on silica gel to obtain the desired product in 76% yield.

## Characterization data for products

### 1. 1-(Naphthalen-1-yl)but-3-en-1-ol (1a, wrh-04-87A, 90B-C)

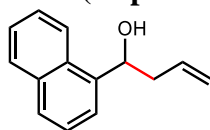

Compound **1a** was prepared as a pale yellow oil (33 mg, 83% yield, eluent: 10:1 hexanes/EtOAc) from 1-naphthaldehyde using  $\text{Fp}^{\text{W}3}(\text{thf})\text{BF}_4$  (10 mol %) according to general procedure A1.

$^1\text{H NMR}$  (300 MHz,  $\text{CDCl}_3$ )  $\delta$  8.14 – 8.04 (m, 1H), 7.94 – 7.85 (m, 1H), 7.80 (d,  $J = 8.2$  Hz, 1H), 7.67 (d,  $J = 7.1$  Hz, 1H), 7.59 – 7.43 (m, 3H), 6.03 – 5.85 (m, 1H), 5.53 (dd,  $J = 8.1, 3.9$  Hz, 1H), 5.31 – 5.13 (m, 2H), 2.85 – 2.71 (m, 1H), 2.69 – 2.52 (m, 1H), 2.27 (s, 1H).

$^{13}\text{C NMR}$  (100 MHz,  $\text{CDCl}_3$ )  $\delta$  139.5, 134.9, 133.9, 130.4, 129.1, 128.1, 126.2, 125.63, 125.56, 123.1, 122.1, 118.5, 70.1, 42.1.

**HRMS** (APCI) calcd for  $\text{C}_{14}\text{H}_{13} [\text{M}-\text{OH}]^+$ : 181.1012, found: 181.1010.

### 2. 1-(3-Methoxyphenyl)but-3-en-1-ol (2a, wrh-04-97A)

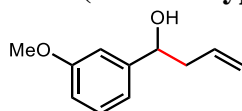

Compound **2a** was prepared as a pale yellow oil (30 mg, 82% yield, eluent: 10:1 → 5:1 hexanes/EtOAc) from 3-methoxybenzaldehyde using  $\text{Fp}^{\text{W}3}(\text{thf})\text{BF}_4$  (5 mol %) according to general procedure A1.

$^1\text{H NMR}$  (400 MHz,  $\text{CDCl}_3$ )  $\delta$  7.24 – 7.12 (m, 1H), 6.92 – 6.80 (m, 2H), 6.74 (d,  $J = 8.2$  Hz, 1H), 5.82 – 5.65 (m, 1H), 5.17 – 5.00 (m, 2H), 4.70 – 4.57 (m, 1H), 3.73 (s, 3H), 2.50 – 2.34 (m, 2H), 2.08 (s, 1H).

$^{13}\text{C NMR}$  (100 MHz,  $\text{CDCl}_3$ )  $\delta$  159.8, 145.7, 134.6, 129.5, 118.5, 118.2, 113.1, 111.4, 73.3, 55.3, 43.9.

**HRMS** (ESI) calcd for  $\text{C}_{11}\text{H}_{15}\text{O}_2 [\text{M}+\text{H}]^+$ : 179.1067, found: 179.1067.

### 3. 1-(4-(Phenylethynyl)phenyl)but-3-en-1-ol (3a, wrh-04-163A)

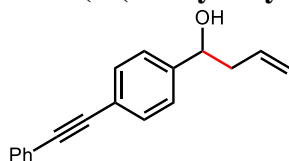

Compound **3a** was prepared as a pale yellow oil (44 mg, 87% yield, eluent: 15:1 → 10:1 hexanes/EtOAc) from 4-(phenylethynyl)benzaldehyde using  $\text{Fp}^{\text{W}3}(\text{thf})\text{BF}_4$  (10 mol %) according to general procedure A1.

$^1\text{H NMR}$  (500 MHz,  $\text{CDCl}_3$ )  $\delta$  7.58 – 7.50 (m, 4H), 7.40 – 7.30 (m, 5H), 5.86 – 5.74 (m, 1H), 5.22 – 5.12 (m, 2H), 4.75 (dd,  $J = 7.7, 5.1$  Hz, 1H), 2.58 – 2.44 (m, 2H), 2.12 (s, 1H).

$^{13}\text{C NMR}$  (125 MHz,  $\text{CDCl}_3$ )  $\delta$  144.2, 134.2, 131.8, 131.7, 128.5, 128.4, 126.0, 123.4, 122.5, 118.9, 89.5, 89.4, 73.1, 43.9.

**HRMS** (ESI) calcd for  $\text{C}_{18}\text{H}_{15} [\text{M}-\text{OH}]^+$ : 231.1168, found: 231.1164.

### 4. 1-Phenylbut-3-en-1-ol (4a, wrh-05-36)

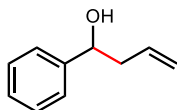

Compound **4a** was prepared as a pale yellow oil (23 mg, 77% yield, eluent: 15:1 → 10:1 hexanes/EtOAc) from benzaldehyde using  $\text{Fp}^{\text{W}3}(\text{thf})\text{BF}_4$  (10 mol %) according to general procedure A1.

$^1\text{H NMR}$  (400 MHz,  $\text{CDCl}_3$ )  $\delta$  7.33 – 7.15 (m, 5H), 5.80 – 5.65 (m, 1H), 5.15 – 5.00 (m, 2H), 4.65 (dd,  $J = 7.2, 5.6$  Hz, 1H), 2.51 – 2.35 (m, 2H), 2.04 (s, 1H).

$^1\text{H NMR}$  data were in agreement with the literature.<sup>1</sup>

#### 5. 1-(4-Bromophenyl)but-3-en-1-ol (5a, wrh-04-61A, wrh-04-12D)

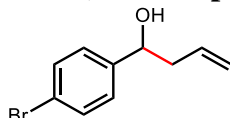

Compound **5a** was prepared as a pale yellow oil (38 mg, 84% yield, eluent: 8:1 hexanes/EtOAc) from 4-bromobenzaldehyde using  $\text{Fp}^{\text{W}3}(\text{thf})\text{BF}_4$  (5 mol %) according to general procedure A1.

$^1\text{H NMR}$  (400 MHz,  $\text{CDCl}_3$ )  $\delta$  7.47 (d,  $J = 8.1$  Hz, 2H), 7.24 (d,  $J = 8.1$  Hz, 2H), 5.89 – 5.69 (m, 1H), 5.29 – 5.06 (m, 2H), 4.80 – 4.63 (m, 1H), 2.59 – 2.37 (m, 2H), 2.02 (s, 1H).

$^{13}\text{C NMR}$  (100 MHz,  $\text{CDCl}_3$ )  $\delta$  142.9, 134.0, 131.6, 127.7, 121.4, 119.0, 72.7, 43.9.

**HRMS** (ESI) calcd for  $\text{C}_{10}\text{H}_{10}\text{Br}$  [ $\text{M}-\text{OH}$ ]<sup>+</sup>: 208.9960, found: 208.9961.

#### 6. 1-(2,6-Dichlorophenyl)but-3-en-1-ol (6a, wrh-04-93A)

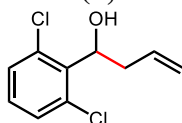

Compound **6a** was prepared as a pale yellow oil (40 mg, 91% yield, eluent: 20:1 hexanes/EtOAc) from 2,6-dichlorobenzaldehyde using  $\text{Fp}^{\text{W}3}(\text{thf})\text{BF}_4$  (5 mol %) according to general procedure A1.

$^1\text{H NMR}$  (500 MHz,  $\text{CDCl}_3$ )  $\delta$  7.29 (d,  $J = 8.0$  Hz, 2H), 7.13 (t,  $J = 8.0$  Hz, 1H), 5.90 – 5.77 (m, 1H), 5.55 – 5.44 (m, 1H), 5.13 (d,  $J = 17.1$  Hz, 1H), 5.09 (d,  $J = 10.1$  Hz, 1H), 2.91 (d,  $J = 9.7$  Hz, 1H), 2.89 – 2.80 (m, 1H), 2.74 – 2.63 (m, 1H).

$^{13}\text{C NMR}$  (125 MHz,  $\text{CDCl}_3$ )  $\delta$  137.4, 134.4, 133.9, 129.5, 129.0, 118.2, 71.5, 40.1.

**HRMS** (ESI) calcd for  $\text{C}_{10}\text{H}_9\text{Cl}_2$  [ $\text{M}-\text{OH}$ ]<sup>+</sup>: 199.0076, found: 199.0078.

#### 7. 1-(4-(Methylsulfonyl)phenyl)but-3-en-1-ol (7a, wrh-04-116A)

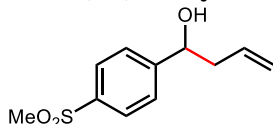

Compound **7a** was prepared as a pale yellow oil (35 mg, 79% yield, eluent: 1.5:1 hexanes/EtOAc) from 4-(methylsulfonyl)benzaldehyde using  $\text{Fp}^{\text{W}3}(\text{thf})\text{BF}_4$  (10 mol %) according to general procedure A1.

$^1\text{H NMR}$  (300 MHz,  $\text{CDCl}_3$ )  $\delta$  7.91 (d,  $J = 8.2$  Hz, 2H), 7.57 (d,  $J = 8.2$  Hz, 2H), 5.90 – 5.68 (m, 1H), 5.28 – 5.11 (m, 2H), 4.85 (dd,  $J = 7.9, 4.6$  Hz, 1H), 3.05 (s, 3H), 2.63 – 2.38 (m, 2H), 2.21 (br s, 1H).

$^{13}\text{C NMR}$  (75 MHz,  $\text{CDCl}_3$ )  $\delta$  150.4, 139.4, 133.5, 127.6, 126.9, 119.4, 72.4, 44.6, 44.0.

**HRMS** (ESI) calcd for  $\text{C}_{11}\text{H}_{15}\text{O}_3\text{S}$  [ $\text{M}+\text{H}$ ]<sup>+</sup>: 227.0736, found: 227.0741.



**8. 4-(1-Hydroxybut-3-en-1-yl)phenyl 4-methylbenzenesulfonate (8a, wrh-04-98A)**

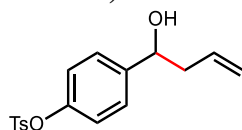

Compound **8a** was prepared as a pale yellow oil (57 mg, 89% yield, eluent: 4:1 → 3:1 hexanes/EtOAc) from 4-formylphenyl 4-methylbenzenesulfonate using  $\text{Fp}^{\text{W3}}(\text{thf})\text{BF}_4$  (10 mol %) according to general procedure A1.

$^1\text{H NMR}$  (500 MHz,  $\text{CDCl}_3$ )  $\delta$  7.61 (d,  $J = 8.0$  Hz, 2H), 7.21 (dd,  $J = 17.9, 8.1$  Hz, 4H), 6.87 (d,  $J = 8.4$  Hz, 2H), 5.76 – 5.60 (m, 1H), 5.14 – 4.99 (m, 2H), 4.69 – 4.57 (m, 1H), 2.46 – 2.28 (m, 5H), 2.13 (s, 1H).

$^{13}\text{C NMR}$  (125 MHz,  $\text{CDCl}_3$ )  $\delta$  148.9, 145.5, 142.9, 134.0, 132.4, 129.9, 128.6, 127.1, 122.4, 119.0, 72.5, 44.0, 21.8.

**HRMS** (ESI) calcd for  $\text{C}_{17}\text{H}_{19}\text{O}_4\text{S}$   $[\text{M}+\text{H}]^+$ : 319.0999, found: 319.0989.

**9. *N*-(4-(1-Hydroxybut-3-en-1-yl)phenyl)-*N*,4-dimethylbenzenesulfonamide (9a, wrh-04-96A)**

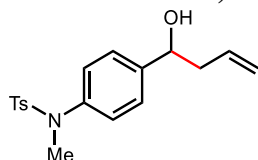

Compound **9a** was prepared as a pale yellow oil (46 mg, 70% yield, eluent: 3:1 → 2:1 hexanes/EtOAc) from *N*-(4-formylphenyl)-*N*,4-dimethylbenzenesulfonamide according to general procedure A2.

$^1\text{H NMR}$  (300 MHz,  $\text{CDCl}_3$ )  $\delta$  7.34 (d,  $J = 8.1$  Hz, 2H), 7.29 – 7.10 (m, 4H), 6.99 (d,  $J = 8.4$  Hz, 2H), 5.82 – 5.61 (m, 1H), 5.20 – 4.99 (m, 2H), 4.73 – 4.58 (m, 1H), 3.07 (s, 3H), 2.51 – 2.36 (m, 2H), 2.34 (s, 3H), 2.15 (s, 1H).

$^{13}\text{C NMR}$  (100 MHz,  $\text{CDCl}_3$ )  $\delta$  143.7, 143.0, 140.8, 134.3, 133.6, 129.4, 128.1, 126.6, 126.4, 118.8, 72.7, 44.0, 38.2, 21.6.

**HRMS** (ESI) calcd for  $\text{C}_{18}\text{H}_{22}\text{O}_3\text{NS}$   $[\text{M}+\text{H}]^+$ : 332.1315, found: 332.1307.

**10. 1-(4-Methoxy-3-(trifluoromethyl)phenyl)but-3-en-1-ol (10a, wrh-04-95A)**

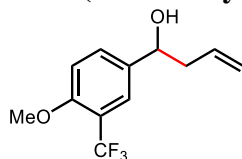

Compound **10a** was prepared as a pale yellow oil (34 mg, 69% yield, eluent: 5:1 → 3:1 hexanes/EtOAc) from 4-methoxy-3-(trifluoromethyl)benzaldehyde according to general procedure A2.

$^1\text{H NMR}$  (500 MHz,  $\text{CDCl}_3$ )  $\delta$  7.56 (s, 1H), 7.48 (d,  $J = 8.5$  Hz, 1H), 6.98 (d,  $J = 8.5$  Hz, 1H), 5.84 – 5.72 (m, 1H), 5.23 – 5.12 (m, 2H), 4.78 – 4.67 (m, 1H), 3.90 (s, 3H), 2.58 – 2.41 (m, 2H), 2.12 (s, 1H).

$^{13}\text{C NMR}$  (125 MHz,  $\text{CDCl}_3$ )  $\delta$  157.0, 135.7, 134.1, 130.8, 124.9 (q,  $J = 5.2$  Hz), 123.8 (q,  $J = 270$  Hz), 119.1, 119.1 – 118.4 (q,  $J = 31.2$  Hz), 112.1, 72.5, 56.2, 44.0.

$^{19}\text{F NMR}$  (471 MHz,  $\text{CDCl}_3$ )  $\delta$  -62.39.

**HRMS** (APCI) calcd for  $\text{C}_{12}\text{H}_{12}\text{F}_3\text{O}$   $[\text{M}-\text{OH}]^+$ : 229.0835, found: 229.0833.

**11. 1-(5-Nitrothiophen-2-yl)but-3-en-1-ol (11a, wrh-04-120A)**

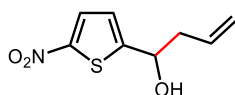

Compound **11a** was prepared as a brown oil (32 mg, 80% yield, eluent: 3:1 hexanes/EtOAc) from 5-nitrothiophene-2-carbaldehyde using  $\text{Fp}^{\text{W}3}(\text{thf})\text{BF}_4$  (10 mol %) according to general procedure A1.

$^1\text{H NMR}$  (300 MHz,  $\text{CDCl}_3$ )  $\delta$  7.80 (d,  $J = 4.2$  Hz, 1H), 6.90 (dd,  $J = 4.2, 0.8$  Hz, 1H), 5.90 – 5.71 (m, 1H), 5.33 – 5.17 (m, 2H), 5.05 – 4.94 (m, 1H), 2.75 – 2.43 (m, 3H).

$^{13}\text{C NMR}$  (75 MHz,  $\text{CDCl}_3$ )  $\delta$  157.1, 150.7, 132.3, 128.7, 122.5, 120.6, 69.4, 43.7.

**HRMS** (ESI) calcd for  $\text{C}_8\text{H}_{10}\text{O}_3\text{NS}$   $[\text{M}+\text{H}]^+$ : 200.0376, found: 200.0371.

## 12. 1-(Benzo[*b*]thiophen-2-yl)but-3-en-1-ol (**12a**, wrh-04-158B)

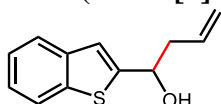

Compound **12a** was prepared as a pale yellow oil (21 mg, 52% yield, eluent: 20:1 → 10:1 hexanes/EtOAc) from benzo[*b*]thiophene-2-carbaldehyde according to general procedure A2.

$^1\text{H NMR}$  (400 MHz,  $\text{CDCl}_3$ )  $\delta$  7.85 – 7.79 (m, 1H), 7.75 – 7.69 (m, 1H), 7.38 – 7.27 (m, 2H), 7.20 (s, 1H), 5.86 (ddt,  $J = 17.2, 10.2, 7.1$  Hz, 1H), 5.27 – 5.15 (m, 2H), 5.07 (t,  $J = 6.3$  Hz, 1H), 2.76 – 2.62 (m, 2H), 2.29 (s, 1H).

$^{13}\text{C NMR}$  (100 MHz,  $\text{CDCl}_3$ )  $\delta$  148.5, 139.6, 139.5, 133.6, 124.4, 124.3, 123.6, 122.6, 120.3, 119.3, 70.0, 43.6.

**HRMS** (ESI) calcd for  $\text{C}_{12}\text{H}_{11}\text{S}$   $[\text{M}-\text{OH}]^+$ : 187.0576, found: 187.0566.

## 13. 4-Chloro-3-(1-hydroxybut-3-en-1-yl)-6-methyl-2*H*-chromen-2-one (**13a**, wrh-04-152A)

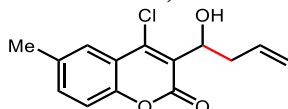

Compound **13a** was prepared as a pale yellow oil (43 mg, 81% yield, eluent: 6:1 hexanes/EtOAc) from 4-chloro-6-methyl-2-oxo-2*H*-chromene-3-carbaldehyde using  $\text{Fp}^{\text{W}3}(\text{thf})\text{BF}_4$  (10 mol %) according to general procedure A1.

$^1\text{H NMR}$  (500 MHz,  $\text{CDCl}_3$ )  $\delta$  7.68 (s, 1H), 7.40 (d,  $J = 8.3$  Hz, 1H), 7.25 (d,  $J = 8.5$  Hz, 1H), 5.91 – 5.79 (m, 1H), 5.19 – 5.02 (m, 3H), 4.13 (d,  $J = 11.8$  Hz, 1H), 2.74 (dt,  $J = 14.2, 7.2$  Hz, 1H), 2.59 (dt,  $J = 13.9, 6.9$  Hz, 1H), 2.44 (s, 3H).

$^{13}\text{C NMR}$  (125 MHz,  $\text{CDCl}_3$ , rotamers observed)  $\delta$  160.3, 149.8, 145.3, 135.2, 133.9, 133.5, 126.4, 125.8, 118.2, 117.9, 116.6, 70.7/70.6\*, 40.71/40.68\*, 21.1.

**HRMS** (ESI) calcd for  $\text{C}_{14}\text{H}_{14}\text{O}_3\text{Cl}$   $[\text{M}+\text{H}]^+$ : 265.0626, found: 265.0615.

## 14. 1-(Dibenzo[*b,d*]furan-2-yl)but-3-en-1-ol (**14a**, wrh-04-125B)

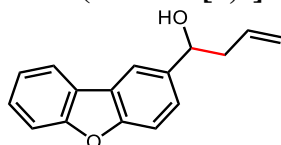

Compound **14a** was prepared as a pale yellow oil (23 mg, 48% yield, eluent: 15:1 → 10:1 hexanes/EtOAc) from dibenzo[*b,d*]furan-2-carbaldehyde according to general procedure A2.

$^1\text{H NMR}$  (500 MHz,  $\text{CDCl}_3$ )  $\delta$  7.97 (d,  $J = 1.2$  Hz, 1H), 7.95 (d,  $J = 7.7$  Hz, 1H), 7.63 – 7.50 (m, 2H), 7.50 – 7.41 (m, 2H), 7.35 (t,  $J = 7.3$  Hz, 1H), 5.85 (ddt,  $J = 17.1, 10.1,$

7.1 Hz, 1H), 5.26 – 5.12 (m, 2H), 4.96 – 4.86 (m, 1H), 2.68 – 2.54 (m, 2H), 2.20 (s, 1H).

<sup>13</sup>C NMR (125 MHz, CDCl<sub>3</sub>) δ 156.7, 155.8, 138.7, 134.5, 127.3, 125.3, 124.4, 124.3, 122.9, 120.8, 118.7, 118.1, 111.8, 111.6, 73.5, 44.5.

HRMS (ESI) calcd for C<sub>16</sub>H<sub>13</sub>O [M–OH]<sup>+</sup>: 221.0961, found: 221.0959.

### 15. 1-(6-(Trifluoromethyl)pyridin-3-yl)but-3-en-1-ol (15a, wrh-04-107B)

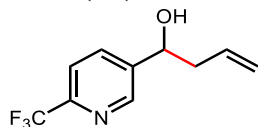

Compound **15a** was prepared as a yellow oil (40 mg, 91% yield, eluent: 4:1 → 3:1 hexanes/EtOAc) from 6-(trifluoromethyl)nicotinaldehyde using Fp<sup>W3</sup>(thf)BF<sub>4</sub> (10 mol %) according to general procedure A1. 80% yield was obtained using 5 mol % of catalyst.

<sup>1</sup>H NMR (400 MHz, CDCl<sub>3</sub>) δ 8.66 (s, 1H), 7.89 (d, *J* = 7.9 Hz, 1H), 7.66 (d, *J* = 8.1 Hz, 1H), 5.90 – 5.67 (m, 1H), 5.29 – 5.11 (m, 2H), 4.95 – 4.80 (m, 1H), 2.67 (s, 1H), 2.62 – 2.41 (m, 2H).

<sup>13</sup>C NMR (100 MHz, CDCl<sub>3</sub>) δ 148.1, 147.3 (q, *J* = 34 Hz), 142.6, 135.0, 133.0, 121.7 (q, *J* = 272 Hz), 120.3 (q, *J* = 3.0 Hz), 120.0, 70.5, 43.9.

<sup>19</sup>F NMR (376 MHz, CDCl<sub>3</sub>) δ –67.75.

HRMS (ESI) calcd for C<sub>10</sub>H<sub>11</sub>ONF<sub>3</sub> [M+H]<sup>+</sup>: 218.0787, found: 218.0788.

### 16. 1-(2-(Trifluoromethyl)quinolin-4-yl)but-3-en-1-ol (16a, wrh-04-140A)

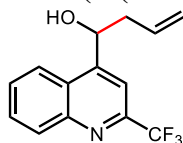

Compound **16a** was prepared as a pale yellow oil (50 mg, 93% yield, eluent: 5:1 hexanes/EtOAc) from 2-(trifluoromethyl)quinoline-4-carbaldehyde using Fp<sup>W3</sup>(thf)BF<sub>4</sub> (10 mol %) according to general procedure A1.

<sup>1</sup>H NMR (500 MHz, CDCl<sub>3</sub>) δ 8.27 (d, *J* = 8.5 Hz, 1H), 8.04 (d, *J* = 8.4 Hz, 1H), 7.98 (s, 1H), 7.86 – 7.79 (m, 1H), 7.73 – 7.66 (m, 1H), 5.97 – 5.86 (m, 1H), 5.58 (dd, *J* = 8.6, 3.6 Hz, 1H), 5.32 – 5.22 (m, 2H), 2.84 – 2.75 (m, 1H), 2.58 – 2.47 (m, 1H), 2.39 (s, 1H).

<sup>13</sup>C NMR (125 MHz, CDCl<sub>3</sub>) δ 152.1, 148.1 (q, *J* = 34.5 Hz), 147.4, 133.4, 131.3, 130.4, 128.7, 126.0, 122.8, 121.7 (q, *J* = 276 Hz), 120.0, 113.5 (q, *J* = 2.5 Hz), 68.9, 43.1.

<sup>19</sup>F NMR (470 MHz, CDCl<sub>3</sub>) δ –67.58.

HRMS (ESI) calcd for C<sub>14</sub>H<sub>13</sub>ONF<sub>3</sub> [M+H]<sup>+</sup>: 268.0944, found: 268.0941.

### 17. 1-(1-((4-Bromophenyl)sulfonyl)-1*H*-indol-4-yl)but-3-en-1-ol (17a, wrh-04-101B)

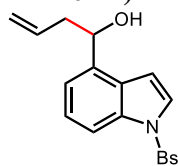

Compound **17a** was prepared as a pale yellow oil (52 mg, 64% yield, eluent: 5:1 → 3:1 hexanes/EtOAc) from 1-((4-bromophenyl)sulfonyl)-1*H*-indole-4-carbaldehyde according to general procedure A2.

**<sup>1</sup>H NMR** (400 MHz, CDCl<sub>3</sub>) δ 7.81 (d, *J* = 7.9 Hz, 1H), 7.64 (d, *J* = 8.4 Hz, 2H), 7.54 – 7.40 (m, 3H), 7.31 – 7.13 (m, 2H), 6.79 (d, *J* = 3.3 Hz, 1H), 5.80 – 5.64 (m, 1H), 5.16 – 5.00 (m, 2H), 4.93 (t, *J* = 6.1 Hz, 1H), 2.48 (t, *J* = 6.6 Hz, 2H), 2.12 (s, 1H).

**<sup>13</sup>C NMR** (100 MHz, CDCl<sub>3</sub>) δ 137.2, 136.9, 135.1, 134.4, 132.7, 129.3, 128.34, 128.31, 126.1, 125.0, 120.6, 118.6, 112.8, 108.3, 72.0, 43.0.

**HRMS** (ESI) calcd for C<sub>18</sub>H<sub>15</sub>O<sub>3</sub>NBrS [M–H]<sup>+</sup>: 403.9951, found: 403.9941.

### 18. 1-(2,4-Dichlorothiazol-5-yl)but-3-en-1-ol (18a, wrh-04-159A)

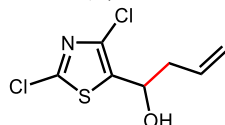

Compound **18a** was prepared as a pale yellow oil (34 mg, 76% yield, eluent: 15:1 → 10:1 hexanes/EtOAc) from 2,4-dichlorothiazole-5-carbaldehyde using Fp<sup>W3</sup>(thf)BF<sub>4</sub> (10 mol %) according to general procedure A1.

**<sup>1</sup>H NMR** (500 MHz, CDCl<sub>3</sub>) δ 5.90 – 5.75 (m, 1H), 5.30 – 5.15 (m, 2H), 5.11 – 5.00 (m, 1H), 2.70 – 2.43 (m, 3H).

**<sup>13</sup>C NMR** (125 MHz, CDCl<sub>3</sub>) δ 150.7, 137.3, 132.4, 132.3, 120.4, 67.0, 42.5.

**HRMS** (ESI) calcd for C<sub>7</sub>H<sub>8</sub>ONCl<sub>2</sub>S [M+H]<sup>+</sup>: 223.9698, found: 223.9688.

### 19. 1-(5-Chloro-1-methyl-3-(trifluoromethyl)-1H-pyrazol-4-yl)but-3-en-1-ol (19a, wrh-04-154B)

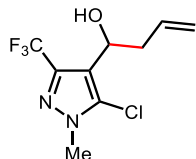

Compound **19a** was prepared as a pale yellow oil (45 mg, 88% yield, eluent: 6:1 hexanes/EtOAc) from 5-chloro-1-methyl-3-(trifluoromethyl)-1H-pyrazole-4-carbaldehyde using Fp<sup>W3</sup>(thf)BF<sub>4</sub> (10 mol %) according to general procedure A1.

**<sup>1</sup>H NMR** (500 MHz, CDCl<sub>3</sub>) δ 5.76 (ddt, *J* = 17.2, 10.2, 7.1 Hz, 1H), 5.20 – 5.10 (m, 2H), 4.89 – 4.83 (m, 1H), 3.87 (s, 3H), 2.71 – 2.61 (m, 1H), 2.58 – 2.48 (m, 1H), 2.17 (s, 1H).

**<sup>13</sup>C NMR** (125 MHz, CDCl<sub>3</sub>) δ 138.8 (q, *J* = 37.8 Hz), 133.6, 127.5, 121.1 (q, *J* = 268 Hz), 119.0, 118.7, 65.1, 41.4, 37.0.

**<sup>19</sup>F NMR** (470 MHz, CDCl<sub>3</sub>) δ –60.49.

**HRMS** (ESI) calcd for C<sub>9</sub>H<sub>11</sub>ON<sub>2</sub>ClF<sub>3</sub> [M+H]<sup>+</sup>: 255.0506, found: 255.0504.

### 20. 8-(2,5-Dimethylphenoxy)-5,5-dimethyloct-1-en-4-ol (20a, wrh-04-107A)

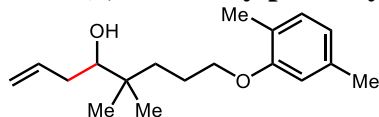

Compound **20a** was prepared as a pale yellow oil (43 mg, 78% yield, eluent: 30:1 → 20:1 hexanes/EtOAc) from 5-(2,5-dimethylphenoxy)-2,2-dimethylpentanal (**20**) using Fp<sup>W3</sup>(thf)BF<sub>4</sub> (10 mol %) according to general procedure A1.

**<sup>1</sup>H NMR** (400 MHz, CDCl<sub>3</sub>) δ 7.02 (d, *J* = 7.4 Hz, 1H), 6.67 (d, *J* = 7.5 Hz, 1H), 6.64 (s, 1H), 5.96 – 5.80 (m, 1H), 5.25 – 5.09 (m, 2H), 3.94 (t, *J* = 6.1 Hz, 2H), 3.39 (d, *J* = 10.5 Hz, 1H), 2.40 (dd, *J* = 13.8, 4.4 Hz, 1H), 2.32 (s, 3H), 2.20 (s, 3H), 2.11 – 1.97 (m, 1H), 1.92 – 1.71 (m, 2H), 1.65 (s, 1H), 1.61 – 1.50 (m, 1H), 1.49 – 1.36 (m, 1H), 0.95 (d, *J* = 6.5 Hz, 6H).

$^{13}\text{C}$  NMR (100 MHz,  $\text{CDCl}_3$ )  $\delta$  157.2, 136.63, 136.57, 130.4, 123.7, 120.8, 118.1, 112.1, 68.7, 37.0, 36.4, 35.3, 24.1, 23.11, 23.09, 21.5, 15.9.

HRMS (ESI) calcd for  $\text{C}_{18}\text{H}_{29}\text{O}_2$   $[\text{M}+\text{H}]^+$ : 277.2162, found: 277.2161.

### 21. 1-(1-Benzylcyclopentyl)but-3-en-1-ol (21a, wrh-04-125A)

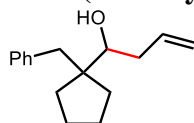

Compound **21a** was prepared as a pale yellow oil (40 mg, 86% yield, eluent: 60:1  $\rightarrow$  50:1 hexanes/EtOAc) from 1-benzylcyclopentane-1-carbaldehyde (**21**) according to general procedure A2.

$^1\text{H}$  NMR (500 MHz,  $\text{CDCl}_3$ )  $\delta$  7.24 – 7.09 (m, 5H), 5.83 – 5.71 (m, 1H), 5.14 – 5.03 (m, 2H), 3.39 (d,  $J$  = 10.4 Hz, 1H), 2.81 (d,  $J$  = 13.2 Hz, 1H), 2.51 (d,  $J$  = 13.3 Hz, 1H), 2.42 – 2.31 (m, 1H), 2.10 – 1.97 (m, 1H), 1.67 – 1.32 (m, 9H).

$^{13}\text{C}$  NMR (125 MHz,  $\text{CDCl}_3$ )  $\delta$  139.6, 136.5, 130.9, 128.0, 126.0, 118.1, 75.0, 50.7, 42.0, 37.3, 33.4, 33.2, 25.7, 25.6.

HRMS (ESI) calcd for  $\text{C}_{16}\text{H}_{21}$   $[\text{M}-\text{OH}]^+$ : 213.1638, found: 213.1633.

### 22. 1-(4-Benzyl-1-tosylpiperidin-4-yl)but-3-en-1-ol (22a, wrh-04-146A)

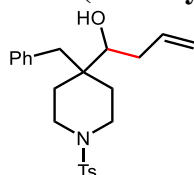

Compound **22a** was prepared as a pale yellow oil (60 mg, 76% yield, eluent: 5:1  $\rightarrow$  4:1 hexanes/EtOAc) from 4-benzyl-1-tosylpiperidine-4-carbaldehyde (**22**) according to general procedure A2.

$^1\text{H}$  NMR (500 MHz,  $\text{CDCl}_3$ )  $\delta$  7.66 (d,  $J$  = 8.1 Hz, 2H), 7.33 (d,  $J$  = 8.0 Hz, 2H), 7.28 – 7.17 (m, 3H), 7.06 (d,  $J$  = 7.1 Hz, 2H), 5.77 – 5.66 (m, 1H), 5.19 – 5.10 (m, 2H), 3.40 – 3.28 (m, 3H), 3.00 – 2.89 (m, 2H), 2.77 (d,  $J$  = 13.6 Hz, 1H), 2.55 (d,  $J$  = 13.6 Hz, 1H), 2.45 (s, 3H), 2.33 (dd,  $J$  = 13.5, 4.2 Hz, 1H), 2.02 (dt,  $J$  = 13.7, 9.9 Hz, 1H), 1.82 – 1.71 (m, 2H), 1.67 – 1.48 (m, 2H), 1.46 – 1.36 (m, 1H).

$^{13}\text{C}$  NMR (125 MHz,  $\text{CDCl}_3$ )  $\delta$  143.6, 137.6, 135.7, 133.6, 130.9, 129.8, 128.2, 127.8, 126.5, 119.1, 71.7, 42.01, 41.97, 38.7, 37.4, 35.8, 29.5, 29.0, 21.7.

HRMS (ESI) calcd for  $\text{C}_{23}\text{H}_{30}\text{O}_3\text{NS}$   $[\text{M}+\text{H}]^+$ : 400.1941, found: 400.1936.

### 23. 1-(4-Benzyltetrahydro-2H-pyran-4-yl)but-3-en-1-ol (23a, wrh-04-156B, 04-184A-C)

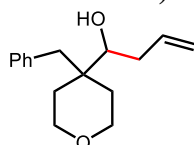

Compound **23a** was prepared as a pale yellow oil (44 mg, 88% yield, eluent: 4:1  $\rightarrow$  3:1 hexanes/EtOAc) from 4-benzyltetrahydro-2H-pyran-4-carbaldehyde (**23**) using  $\text{Fp}^{\text{W}3}(\text{thf})\text{BF}_4$  (10 mol %),  $\text{BF}_3 \cdot \text{Et}_2\text{O}$  (74  $\mu\text{L}$ , 0.6 mmol, 3.0 equiv), TMPH (101  $\mu\text{L}$ , 0.6 mmol, 3.0 equiv) according to general procedure A1.

$^1\text{H}$  NMR (500 MHz,  $\text{CDCl}_3$ )  $\delta$  7.25 – 7.05 (m, 5H), 5.74 (dtd,  $J$  = 14.6, 9.0, 5.6 Hz, 1H), 5.15 – 5.05 (m, 2H), 3.81 – 3.66 (m, 4H), 3.46 (d,  $J$  = 9.2 Hz, 1H), 2.92 (d,  $J$  = 13.6 Hz, 1H), 2.76 (d,  $J$  = 13.6 Hz, 1H), 2.35 (dd,  $J$  = 13.7, 4.4 Hz, 1H), 2.02 (dt,  $J$  = 13.7, 9.9 Hz, 1H), 1.72 – 1.58 (m, 3H), 1.47 – 1.35 (m, 1H), 1.32 – 1.20 (m, 1H).

$^{13}\text{C}$  NMR (100 MHz,  $\text{CDCl}_3$ )  $\delta$  138.2, 136.1, 131.1, 128.1, 126.3, 118.7, 72.4, 63.72, 63.66, 38.7, 37.5, 35.8, 30.3, 30.0.

HRMS (ESI) calcd for  $\text{C}_{16}\text{H}_{23}\text{O}_2$   $[\text{M}+\text{H}]^+$ : 247.1693, found: 247.1685.

**24. 1,1'-(1,4-Phenylene)bis(but-3-en-1-ol) (24a, wrh-04-160C)**

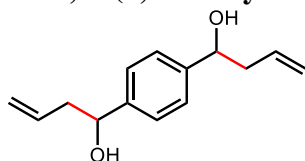

Compound **24a** was prepared as a waxy solid (11 mg, 52% yield, eluent: 3:1  $\rightarrow$  2:1 hexanes/EtOAc) from terephthalaldehyde according to general procedure A2. The reaction was performed on 0.1 mmol scale, with the stoichiometries of the catalyst and reagents doubled.

$^1\text{H}$  NMR (500 MHz,  $\text{CDCl}_3$ )  $\delta$  7.34 (s, 4H), 5.87 – 5.74 (m, 2H), 5.23 – 5.09 (m, 4H), 4.78 – 4.69 (m, 2H), 2.57 – 2.44 (m, 4H), 2.06 (s, 2H).

$^{13}\text{C}$  NMR (125 MHz,  $\text{CDCl}_3$ )  $\delta$  143.3, 134.5, 126.1, 118.6, 73.21/73.18\* (diastereomer observed), 44.0.

HRMS (ESI) calcd for  $\text{C}_{14}\text{H}_{15}$   $[\text{M}-2\text{OH}-\text{H}]^+$ : 183.1168, found: 183.1165.

**25. 1,3,3-Trimethylbicyclo[2.2.1]heptan-2-yl 4-(1-hydroxybut-3-en-1-yl)benzoate (25a, wrh-04-121A)**

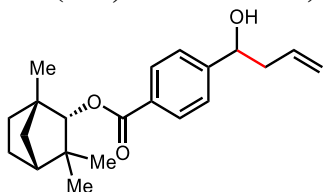

Compound **25a** was prepared as a pale yellow oil (59 mg, 90% yield, eluent: 7:1  $\rightarrow$  6:1 hexanes/EtOAc) from 1,3,3-trimethylbicyclo[2.2.1]heptan-2-yl 4-formylbenzoate (**25**) using  $\text{Fp}^{\text{W}3}(\text{thf})\text{BF}_4$  (5 mol %) according to general procedure A1.

$^1\text{H}$  NMR (500 MHz,  $\text{CDCl}_3$ )  $\delta$  8.04 (d,  $J = 8.2$  Hz, 2H), 7.44 (d,  $J = 8.2$  Hz, 2H), 5.86 – 5.74 (m, 1H), 5.24 – 5.11 (m, 2H), 4.85 – 4.77 (m, 1H), 4.61 (s, 1H), 2.62 – 2.41 (m, 2H), 2.21 (d,  $J = 2.8$  Hz, 1H), 1.99 – 1.87 (m, 1H), 1.85 – 1.72 (m, 2H), 1.71 – 1.61 (m, 1H), 1.57 – 1.47 (m, 1H), 1.29 – 1.19 (m, 2H), 1.18 (s, 3H), 1.11 (s, 3H), 0.84 (s, 3H).

$^{13}\text{C}$  NMR (125 MHz,  $\text{CDCl}_3$ )  $\delta$  166.9, 149.0, 134.0, 130.0, 129.8, 125.9, 119.1, 86.8, 72.9, 48.8, 48.6, 43.9, 41.6, 40.0, 29.9, 27.0, 26.1, 20.4, 19.6.

HRMS (ESI) calcd for  $\text{C}_{21}\text{H}_{29}\text{O}_3$   $[\text{M}+\text{H}]^+$ : 329.2111, found: 329.2101.

**26. 4-(1-Hydroxybut-3-en-1-yl)phenyl 4-(*N,N*-dipropylsulfamoyl)benzoate (26a, wrh-04-107C)**

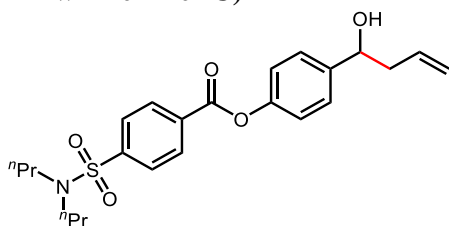

Compound **26a** was prepared as a pale yellow oil (63 mg, 74% yield, eluent: 4:1  $\rightarrow$  3:1 hexanes/EtOAc) from 4-formylphenyl 4-(*N,N*-dipropylsulfamoyl)benzoate (**26**) according to general procedure A2.

**<sup>1</sup>H NMR** (400 MHz, CDCl<sub>3</sub>) δ 8.31 (d, *J* = 8.1 Hz, 2H), 7.94 (d, *J* = 8.2 Hz, 2H), 7.44 (d, *J* = 8.2 Hz, 2H), 7.20 (d, *J* = 8.2 Hz, 2H), 5.91 – 5.75 (m, 1H), 5.25 – 5.10 (m, 2H), 4.84 – 4.73 (m, 1H), 3.12 (t, *J* = 8.0 Hz, 4H), 2.61 – 2.42 (m, 2H), 2.18 (s, 1H), 1.62 – 1.46 (m, 4H), 0.88 (t, *J* = 7.3 Hz, 6H).

**<sup>13</sup>C NMR** (100 MHz, CDCl<sub>3</sub>) δ 164.0, 150.0, 145.0, 142.1, 134.3, 132.9, 130.9, 127.3, 127.2, 121.5, 118.9, 72.1, 50.1, 44.0, 22.1, 11.3.

**HRMS** (ESI) calcd for C<sub>23</sub>H<sub>30</sub>O<sub>5</sub>NS [M+H]<sup>+</sup>: 432.1839, found: 432.1831.

**27. 2,6-Dibromo-4-(2-ethylbenzofuran-3-carbonyl)phenyl 4-(1-hydroxybut-3-en-1-yl)benzoate (27a, wrh-04-187B)**

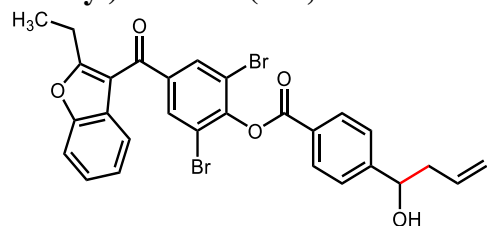

Compound **27a** was prepared as a pale yellow oil (48 mg, 40% yield, eluent: 5:1 hexanes/EtOAc) from 2,6-dibromo-4-(2-ethylbenzofuran-3-carbonyl)phenyl 4-formylbenzoate (**27**) using Fp<sup>W6</sup>(thf)BF<sub>4</sub> (10 mol %) according to general procedure A1.

**<sup>1</sup>H NMR** (500 MHz, CDCl<sub>3</sub>) δ 8.26 (d, *J* = 8.3 Hz, 2H), 8.07 (s, 2H), 7.57 (d, *J* = 8.2 Hz, 2H), 7.51 (d, *J* = 8.1 Hz, 1H), 7.48 – 7.43 (m, 1H), 7.36 – 7.30 (m, 1H), 7.29 – 7.24 (m, 1H), 5.90 – 5.78 (m, 1H), 5.26 – 5.17 (m, 2H), 4.87 (dd, *J* = 8.0, 4.6 Hz, 1H), 2.94 (q, *J* = 7.5 Hz, 2H), 2.65 – 2.56 (m, 1H), 2.55 – 2.46 (m, 1H), 2.26 (s, 1H), 1.38 (t, *J* = 7.5 Hz, 3H).

**<sup>13</sup>C NMR** (125 MHz, CDCl<sub>3</sub>) δ 188.1, 167.5, 162.6, 153.9, 150.8, 150.0, 139.1, 133.8, 133.2, 130.9, 127.2, 126.4, 126.3, 124.9, 124.2, 121.2, 119.4, 118.6, 115.4, 111.3, 72.8, 44.0, 22.2, 12.3.

**HRMS** (ESI) calcd for C<sub>28</sub>H<sub>23</sub>O<sub>5</sub>Br<sub>2</sub> [M+H]<sup>+</sup>: 596.9907, found: 596.9909.

**28. 4-(1-Hydroxybut-3-en-1-yl)phenyl 2-((3-(trifluoromethyl)phenyl)amino)benzoate (28a, wrh-05-11)**

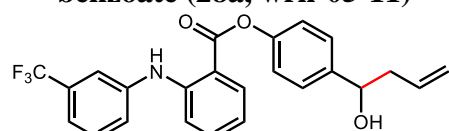

Compound **28a** was prepared as a pale yellow oil (32 mg, 37% yield, eluent: CH<sub>2</sub>Cl<sub>2</sub>) from 4-formylphenyl 2-((3-(trifluoromethyl)phenyl)amino)benzoate (**28**) using Fp<sup>W6</sup>(thf)BF<sub>4</sub> (10 mol %) according to general procedure A1.

**<sup>1</sup>H NMR** (500 MHz, CDCl<sub>3</sub>) δ 9.55 (s, 1H), 8.25 (dd, *J* = 8.1, 1.4 Hz, 1H), 7.53 – 7.29 (m, 8H), 7.20 (d, *J* = 8.5 Hz, 2H), 6.91 (t, *J* = 7.6 Hz, 1H), 5.90 – 5.79 (m, 1H), 5.24 – 5.13 (m, 2H), 4.79 (dd, *J* = 7.9, 5.0 Hz, 1H), 2.62 – 2.46 (m, 2H), 2.05 (s, 1H).

**<sup>13</sup>C NMR** (125 MHz, CDCl<sub>3</sub>) δ 167.4, 150.0, 147.7, 141.9, 141.4, 135.3, 134.4, 132.4, 132.0 (q, *J* = 32.1 Hz), 130.1, 127.2, 124.9, 124.0 (q, *J* = 271 Hz), 121.9, 120.0 (q, *J* = 3.8 Hz), 118.8, 118.5, 118.4 (q, *J* = 3.8 Hz), 114.4, 111.9, 72.9, 44.0.

**<sup>19</sup>F NMR** (376 MHz, CDCl<sub>3</sub>) δ –62.82.

**HRMS** (ESI) calcd for C<sub>24</sub>H<sub>21</sub>O<sub>3</sub>NF<sub>3</sub> [M+H]<sup>+</sup>: 428.1468, found: 428.1455.

**29. ((3*S*,4*R*)-3-((Benzo[*d*][1,3]dioxol-5-yloxy)methyl)-4-(4-fluorophenyl)piperidin-1-yl)(4-(1-hydroxybut-3-en-1-yl)phenyl)methanone (29a, wrh-04-172A, 176A)**

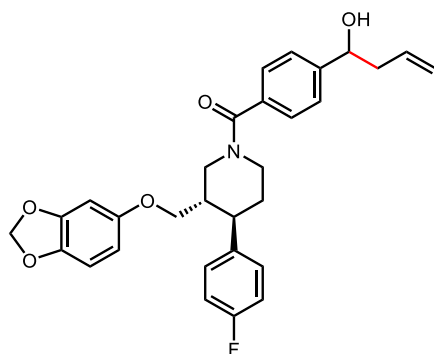

Compound **29a** was prepared as a pale yellow oil (60 mg, 59% yield, eluent: 1:1.2 → 1:1.3 hexanes/EtOAc) from 4-((3*S*,4*R*)-3-((benzo[*d*][1,3]dioxol-5-yloxy)methyl)-4-(4-fluorophenyl)piperidine-1-carbonyl)benzaldehyde (**29**) according to general procedure A2.

**<sup>1</sup>H NMR** (400 MHz, CDCl<sub>3</sub>, rotamers observed) δ 7.48 – 7.37 (m, 4H), 7.16 (dd, *J* = 8.3, 5.5 Hz, 2H), 6.99 (t, *J* = 8.4 Hz, 2H), 6.61 (br s, 1H), 6.39 (br s, 0.5H), 6.16 (br s, 1H), 5.99 (br s, 0.5H), 5.92 – 5.74 (m, 3H), 5.23 – 5.12 (m, 2H), 5.09 – 4.82 (br m, 1H), 4.82 – 4.72 (m, 1H), 4.11 (br s, 0.5H), 3.90 (br s, 0.5H), 3.78 – 3.30 (m, 2H), 3.26 – 2.63 (m, 3H), 2.60 – 2.40 (m, 2H), 2.29 (s, 1H), 2.17 – 1.68 (br m, 3H).

**<sup>13</sup>C NMR** (100 MHz, CDCl<sub>3</sub>) δ 170.5, 162.9, 160.5, 154.2, 153.7, 148.2, 146.0, 141.8, 138.6, 134.9, 134.3, 128.9, 128.8, 127.2, 126.0, 118.6, 115.8, 115.5, 107.9, 105.6, 101.2, 98.1, 72.8, 68.4, 51.2, 48.3, 45.6, 44.2, 43.9, 42.8, 42.0, 34.6, 33.7. (Complexity of the spectrum is due to the presence of rotamers and C–F coupling. C–F coupling constants could not be unambiguously determined.)

**<sup>19</sup>F NMR** (376 MHz, CDCl<sub>3</sub>, rotamers observed) δ –115.7, –115.8.

**HRMS** (ESI) calcd for C<sub>30</sub>H<sub>31</sub>O<sub>5</sub>NF [M+H]<sup>+</sup>: 504.2181, found: 504.2166.

### 30. 3-Allyl-1-benzyl-3-hydroxyindolin-2-one (**30a**, wrh-05-2B)

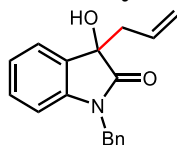

Compound **30a** was prepared as a brown solid (53 mg, 95% yield, eluent: 3:1 hexanes/EtOAc) from 1-benzylindoline-2,3-dione using Fp<sup>W3</sup>(thf)BF<sub>4</sub> (10 mol %) and DCE as solvent according to general procedure A1.

**m.p.** = 146 – 147 °C.

**<sup>1</sup>H NMR** (500 MHz, CDCl<sub>3</sub>) δ 7.41 (d, *J* = 7.1 Hz, 1H), 7.36 – 7.23 (m, 5H), 7.20 (t, *J* = 7.5 Hz, 1H), 7.06 (t, *J* = 7.3 Hz, 1H), 6.70 (d, *J* = 7.7 Hz, 1H), 5.72 – 5.55 (m, 1H), 5.12 (dd, *J* = 25.7, 13.6 Hz, 2H), 5.02 (d, *J* = 15.7 Hz, 1H), 4.73 (d, *J* = 15.7 Hz, 1H), 3.36 (s, 1H), 2.88 – 2.77 (m, 1H), 2.76 – 2.66 (m, 1H).

**<sup>13</sup>C NMR** (125 MHz, CDCl<sub>3</sub>) δ 178.2, 142.6, 135.5, 130.7, 129.8, 129.7, 128.9, 127.8, 127.4, 124.3, 123.2, 120.6, 109.6, 76.1, 43.9, 43.1.

**HRMS** (ESI) calcd for C<sub>18</sub>H<sub>18</sub>O<sub>2</sub>N [M+H]<sup>+</sup>: 280.1332, found: 280.1336.

### 31. 3-Allyl-1-benzyl-5-fluoro-3-hydroxyindolin-2-one (**31a**, wrh-04-191B)

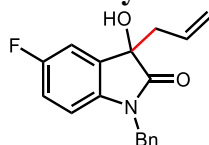



Compound **31a** was prepared as a brown solid (43 mg, 72% yield, eluent: 3:1 hexanes/EtOAc) from 1-benzyl-5-fluoroindoline-2,3-dione using  $\text{Fp}^{\text{W}3}(\text{thf})\text{BF}_4$  (10 mol %) and DCE as solvent according to general procedure A1.

**m.p.** = 126 – 127 °C.

$^1\text{H NMR}$  (500 MHz,  $\text{CDCl}_3$ )  $\delta$  7.37 – 7.19 (m, 5H), 7.15 (dd,  $J = 7.5, 2.1$  Hz, 1H), 6.88 (td,  $J = 8.9, 2.2$  Hz, 1H), 6.59 (dd,  $J = 8.5, 3.9$  Hz, 1H), 5.67 – 5.53 (m, 1H), 5.12 (dd,  $J = 19.4, 13.8$  Hz, 2H), 5.00 (d,  $J = 15.7$  Hz, 1H), 4.70 (d,  $J = 15.7$  Hz, 1H), 4.04 – 3.81 (m, 1H), 2.87 – 2.76 (m, 1H), 2.76 – 2.65 (m, 1H).

$^{13}\text{C NMR}$  (125 MHz,  $\text{CDCl}_3$ )  $\delta$  178.1, 159.6 (d,  $J = 242$  Hz), 138.3, 135.2, 131.6 (d,  $J = 7.9$  Hz), 130.2, 128.9, 127.9, 127.4, 121.0, 115.9 (d,  $J = 23.6$  Hz), 112.5 (d,  $J = 24.9$  Hz), 110.3 (d,  $J = 8.0$  Hz), 76.4, 44.1, 43.1.

$^{19}\text{F NMR}$  (470 MHz,  $\text{CDCl}_3$ )  $\delta$  -119.6.

**HRMS** (ESI) calcd for  $\text{C}_{18}\text{H}_{17}\text{O}_2\text{NF}$   $[\text{M}+\text{H}]^+$ : 298.1238, found: 298.1234.

### 32. *N*-Benzyl-4-methyl-*N*-(1-phenylbut-3-en-1-yl)benzenesulfonamide (**32a**, wrh-04-111A)

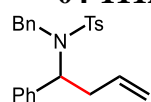

Compound **32a** was prepared as a pale yellow oil (73 mg, 93% yield, eluent: 10:1 hexanes/EtOAc) from *N*-benzyl-*N*-((benzyloxy)(phenyl)methyl)-4-methylbenzene sulfonamide using  $\text{Fp}^{\text{W}3}(\text{thf})\text{BF}_4$  (10 mol %) and DCE as solvent according to general procedure A1.

$^1\text{H NMR}$  (400 MHz,  $\text{CDCl}_3$ )  $\delta$  7.56 (d,  $J = 8.0$  Hz, 2H), 7.16 (d,  $J = 7.8$  Hz, 2H), 7.14 – 6.98 (m, 8H), 6.95 – 6.83 (m, 2H), 5.55 – 5.39 (m, 1H), 4.97 (dd,  $J = 9.0, 6.5$  Hz, 1H), 4.90 – 4.74 (m, 2H), 4.40 (d,  $J = 15.8$  Hz, 1H), 3.86 (d,  $J = 15.8$  Hz, 1H), 2.55 – 2.36 (m, 2H), 2.34 (s, 3H).

$^{13}\text{C NMR}$  (100 MHz,  $\text{CDCl}_3$ )  $\delta$  143.2, 138.5, 137.8, 137.2, 134.8, 129.6, 129.0, 128.4, 128.3, 128.2, 128.0, 127.41, 127.39, 117.5, 61.3, 48.3, 36.9, 21.6.

**HRMS** (ESI) calcd for  $\text{C}_{24}\text{H}_{26}\text{O}_2\text{NS}$   $[\text{M}+\text{H}]^+$ : 392.1679, found: 392.1684.

### 33. Methyl 4-(1-((*N*,2,4,6-tetramethylphenyl)sulfonamido)but-3-en-1-yl)benzoate (**33a**, wrh-04-111B)

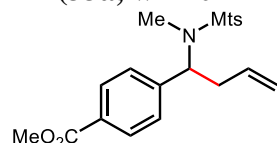

Compound **33a** was prepared as a pale yellow oil (69 mg, 86% yield, eluent: 10:1 → 8:1 hexanes/EtOAc) from methyl 4-(methoxy((*N*,2,4,6-tetramethylphenyl)sulfonamido) methyl)benzoate using  $\text{Fp}^{\text{W}3}(\text{thf})\text{BF}_4$  (10 mol %) and DCE as solvent according to general procedure A1.

$^1\text{H NMR}$  (400 MHz,  $\text{CDCl}_3$ )  $\delta$  7.95 (d,  $J = 8.3$  Hz, 2H), 7.21 (d,  $J = 8.2$  Hz, 2H), 6.95 (s, 2H), 5.64 – 5.47 (m, 1H), 5.05 (dd,  $J = 17.1, 1.1$  Hz, 1H), 4.96 (d,  $J = 10.2$  Hz, 1H), 4.88 (dd,  $J = 9.5, 6.0$  Hz, 1H), 3.89 (s, 3H), 2.93 – 2.79 (m, 1H), 2.78 – 2.67 (m, 1H), 2.64 (s, 3H), 2.56 (s, 6H), 2.31 (s, 3H).

$^{13}\text{C NMR}$  (100 MHz,  $\text{CDCl}_3$ )  $\delta$  166.8, 142.7, 142.6, 140.4, 134.0, 133.2, 132.1, 129.8, 129.7, 128.5, 118.1, 58.7, 52.2, 34.7, 28.3, 23.1, 21.0.

**HRMS** (ESI) calcd for  $\text{C}_{22}\text{H}_{28}\text{O}_4\text{NS}$   $[\text{M}+\text{H}]^+$ : 402.1734, found: 402.1734.

**34. *N*-(2,2-Dimethylhex-5-en-3-yl)-*N*,2,4,6-tetramethylbenzenesulfonamide (34a, wrh-05-9A)**

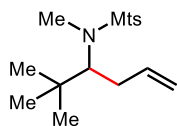

Compound **34a** was prepared as a pale yellow oil (60 mg, 92% yield, eluent: 50:1 hexanes/EtOAc) from methyl *N*-(1-methoxy-2,2-dimethylpropyl)-*N*,2,4,6-tetramethylbenzenesulfonamide using  $\text{Fp}^{\text{W3}}(\text{thf})\text{BF}_4$  (10 mol %) and DCE as solvent according to general procedure A1.

$^1\text{H NMR}$  (500 MHz,  $\text{CDCl}_3$ )  $\delta$  6.91 (s, 2H), 5.57 – 5.43 (m, 1H), 4.97 (d,  $J = 16.9$  Hz, 1H), 4.80 (d,  $J = 10.0$  Hz, 1H), 3.61 – 3.52 (m, 1H), 2.85 (s, 3H), 2.62 (s, 6H), 2.42 – 2.30 (m, 2H), 2.28 (s, 3H), 0.91 (s, 9H).

$^{13}\text{C NMR}$  (125 MHz,  $\text{CDCl}_3$ )  $\delta$  141.8, 139.6, 136.6, 134.6, 132.1, 116.3, 64.9, 36.6, 33.0, 30.7, 28.6, 24.2, 21.0.

**HRMS** (ESI) calcd for  $\text{C}_{18}\text{H}_{30}\text{O}_2\text{NS}$   $[\text{M}+\text{H}]^+$ : 324.1992, found: 324.1987.

**35. 1-Bromo-4-(1-ethoxybut-3-en-1-yl)benzene (35a, WRH-05-123A)**

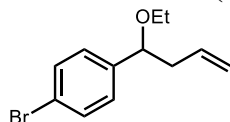

Compound **35a** was prepared as a pale yellow oil (18 mg, 35% yield, gradient elution from 8:1 to 4:1 hexanes/ $\text{CH}_2\text{Cl}_2$ ) from 4-bromobenzaldehyde diethyl acetal using  $\text{Fp}^{\text{W3}}(\text{thf})\text{BF}_4$  (10 mol %) at 100 °C according to general procedure A1.

$^1\text{H NMR}$  (500 MHz,  $\text{CDCl}_3$ )  $\delta$  7.39 (d,  $J = 8.3$  Hz, 2H), 7.10 (d,  $J = 8.3$  Hz, 2H), 5.66 (ddt,  $J = 17.2, 10.3, 7.0$  Hz, 1H), 5.00 – 4.89 (m, 2H), 4.15 (t,  $J = 6.7$  Hz, 1H), 3.34 – 3.21 (m, 2H), 2.52 – 2.42 (m, 1H), 2.34 – 2.23 (m, 1H), 1.09 (t,  $J = 7.0$  Hz, 3H).

$^{13}\text{C NMR}$  (125 MHz,  $\text{CDCl}_3$ )  $\delta$  141.7, 134.6, 131.6, 128.5, 121.3, 117.2, 81.3, 64.4, 42.6, 15.4.

**HRMS** (ESI) calcd for  $\text{C}_{10}\text{H}_{10}\text{Br}$   $[\text{M}-\text{C}_2\text{H}_5\text{O}]^+$ : 208.9960, found: 208.9967.

**36. Methyl 4-(1-ethoxybut-3-en-1-yl)benzoate (36a, WRH-05-121C)**

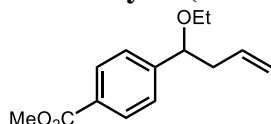

Compound **36a** was prepared as a pale yellow oil (26 mg, 55% yield, eluent: 40:1 hexanes/EtOAc) from methyl 4-(diethoxymethyl)benzoate (**36**) using  $\text{Fp}^{\text{W3}}(\text{thf})\text{BF}_4$  (10 mol %) at 100 °C according to general procedure A1.

$^1\text{H NMR}$  (300 MHz,  $\text{CDCl}_3$ )  $\delta$  8.01 (d,  $J = 8.2$  Hz, 2H), 7.36 (d,  $J = 8.2$  Hz, 2H), 5.83 – 5.65 (m, 1H), 5.07 – 4.93 (m, 2H), 4.32 (t,  $J = 6.6$  Hz, 1H), 3.91 (s, 3H), 3.36 (qd,  $J = 7.0, 1.6$  Hz, 2H), 2.63 – 2.48 (m, 1H), 2.44 – 2.31 (m, 1H), 1.18 (t,  $J = 7.0$  Hz, 3H).

$^{13}\text{C NMR}$  (75 MHz,  $\text{CDCl}_3$ )  $\delta$  167.1, 148.0, 134.5, 129.8, 129.5, 126.7, 117.3, 81.5, 64.6, 52.2, 42.6, 15.4.

**HRMS** (ESI) calcd for  $\text{C}_{14}\text{H}_{19}\text{O}_3$   $[\text{M}+\text{H}]^+$ : 235.1329, found: 235.1336.

**37. 1-(4-Bromophenyl)-2-vinylheptan-1-ol (5b, wrh-04-176C)**

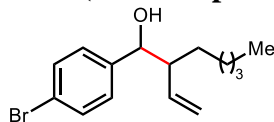

Compound **5b** was prepared as a pale yellow oil (55 mg, 93% yield, 4.8:1 d.r., eluent: 30:1 → 20:1 hexanes/EtOAc) from 1-octene according to general procedure A3.

<sup>1</sup>H NMR (500 MHz, CDCl<sub>3</sub>) δ 7.50 – 7.40 (m, 2H), 7.20/7.14\* (d, *J* = 8.3 Hz, 2H), 5.62/5.47\* (dt, *J* = 17.3, 9.7 Hz, 1H), 5.29 – 5.23/5.13 – 5.05\* (m, 1H), 5.18/5.01\* (d, *J* = 17.2 Hz, 1H), 4.59\*/4.35 (d, *J* = 5.7 Hz\*/7.7 Hz, 1H), 2.43 – 2.31\*/2.27 – 2.18 (m, 1H), 2.00 (s, 1H), 1.56 – 1.06 (m, 8H), 0.92 – 0.79 (m, 3H).

<sup>13</sup>C NMR (125 MHz, CDCl<sub>3</sub>) δ 141.69/141.65\*, 139.1/138.3\*, 131.5/131.2\*, 128.8/128.6\*, 121.5/121.3\*, 119.3/117.9\*, 76.4\*/76.2, 53.0/51.5\*, 32.0\*/31.8, 30.5/29.6\*, 27.05\*/27.00, 22.71\*/22.66, 14.19\*/14.15.

HRMS (ESI) calcd for C<sub>15</sub>H<sub>20</sub>Br [M–OH]<sup>+</sup>: 279.0743, found: 279.0738.

### 38. Methyl 4-(1-hydroxy-2-vinylheptyl)benzoate (**6b**, wrh-05-95A)

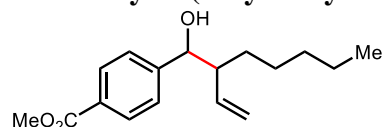

Compound **6b** was prepared as a pale yellow oil (52 mg, 94% yield, 4.6:1 d.r., eluent: 15:1 → 10:1 hexanes/EtOAc) from methyl 4-formylbenzoate according to general procedure A3.

<sup>1</sup>H NMR (500 MHz, CDCl<sub>3</sub>) δ 8.04 – 7.94 (m, 2H), 7.39/7.34\* (d, *J* = 8.2 Hz, 2H), 5.63/5.49\* (dt, *J* = 17.2, 9.7 Hz, 1H), 5.24/5.07\* (dd, *J* = 10.2, 1.5 Hz, 1H), 5.15/5.00\* (d, *J* = 17.2 Hz, 1H), 4.72 – 4.64\*/4.47 (m\*/d, *J* = 7.2 Hz, 1H), 3.90 (s, 3H), 2.45 – 2.17 (m, 2H), 1.56 – 1.06 (m, 8H), 0.90 – 0.78 (m, 3H).

<sup>13</sup>C NMR (125 MHz, CDCl<sub>3</sub>) δ 167.1, 148.0/147.9\*, 138.8/138.4\*, 129.7\*/129.6, 129.4\*/129.3, 127.0/126.8\*, 119.2/117.8\*, 76.7\*/76.3, 52.8/52.2\*, 51.6, 31.9\*/31.8, 30.5/29.5\*, 27.03\*/26.97, 22.7\*/22.6, 14.15\*/14.10.

HRMS (ESI) calcd for C<sub>17</sub>H<sub>25</sub>O<sub>3</sub> [M+H]<sup>+</sup>: 277.1798, found: 277.1804.

### 39. 1-(3-Methoxyphenyl)-2-vinylheptan-1-ol (**7b**, wrh-05-95B)

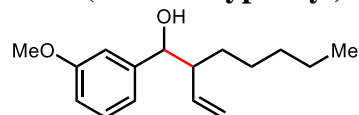

Compound **7b** was prepared as a pale yellow oil (46 mg, 93% yield, 3.6:1 d.r., eluent: 10:1 hexanes/EtOAc) from 3-methoxybenzaldehyde according to general procedure A3.

<sup>1</sup>H NMR (500 MHz, CDCl<sub>3</sub>) δ 7.28 – 7.19 (m, 1H), 6.92 – 6.76 (m, 3H), 5.71 – 5.60/5.58 – 5.47\* (m, 1H), 5.24/5.07\* (dd, *J* = 10.3, 1.7 Hz, 1H), 5.18/5.01\* (dd, *J* = 17.2, 1.5 Hz, 1H), 4.58\*/4.37 (d, *J* = 5.5 Hz\*/7.7 Hz, 1H), 3.81/3.80\* (s, 3H), 2.44 – 2.34\*/2.33 – 2.25 (m, 1H), 2.23/2.13\* (s, 1H), 1.61 – 1.07 (m, 8H), 0.89 – 0.80 (m, 3H).

<sup>13</sup>C NMR (125 MHz, CDCl<sub>3</sub>) δ 159.7/159.6\*, 144.5\*/144.4, 139.5/138.8\*, 129.3/129.1\*, 119.5/119.3\*, 118.7/117.2\*, 113.2/112.8\*, 112.6, 77.0\*/76.8, 55.3, 52.7/51.5\*, 32.0\*/31.8, 30.5/29.6\*, 27.1\*/27.0, 22.7\*/22.6, 14.2\*/14.1.

HRMS (ESI) calcd for C<sub>16</sub>H<sub>23</sub>O [M–OH]<sup>+</sup>: 231.1743, found: 231.1750.

### 40. 1-(4-Bromophenyl)-5-chloro-2-vinylpentan-1-ol (**5c**, wyd-6-170)

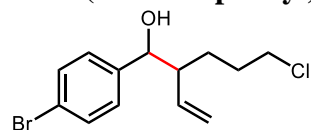

Compound **5c** was prepared as a pale yellow oil (53 mg, 86% yield, 3.7:1 d.r., eluent: 15:1 hexanes/EtOAc) from 1-(4-bromophenyl)-5-chloro-2-vinylpentan-1-ol according to general procedure A3.

$^1\text{H NMR}$  (500 MHz,  $\text{CDCl}_3$ )  $\delta$  7.50 – 7.41 (m, 2H), 7.19/7.15\* (d,  $J = 7.7$  Hz, 2H), 5.68 – 5.56/5.54 – 5.42\* (m, 1H), 5.28/5.10\* (d,  $J = 10.2$  Hz, 1H), 5.18/5.00\* (d,  $J = 17.1$  Hz, 1H), 4.57\*/4.40 (d,  $J = 5.8$  Hz\*/7.3 Hz, 1H), 3.55 – 3.36 (m, 2H), 2.41 – 2.30 (m, 0.8H), 2.29 – 2.21 (m, 0.2H), 2.08 (s, 1H), 1.88 – 1.55 (m, 3H), 1.40 – 1.29 (m, 1H).

$^{13}\text{C NMR}$  (125 MHz,  $\text{CDCl}_3$ )  $\delta$  141.5\*/141.3, 138.2/137.7\*, 131.5/131.3\*, 128.7/128.5\*, 121.7/121.5\*, 119.8/118.4\*, 76.4\*/76.2, 52.3/51.0\*, 45.1\*/44.9, 30.51\*/30.47, 27.7/27.0\*.

**HRMS** (ESI) calcd for  $\text{C}_{13}\text{H}_{15}\text{BrCl}$   $[\text{M}-\text{OH}]^+$ : 285.0040, found: 285.0027.

#### 41. 8-((4-Bromophenyl)(hydroxy)methyl)dec-9-en-1-yl 4-methylbenzenesulfonate (**5d**, wyd-6-167)

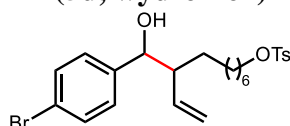

Compound **5d** was prepared as a pale yellow oil (94 mg, 95% yield, 3.4:1 d.r., eluent: 5:1 hexanes/EtOAc) from dec-9-en-1-yl 4-methylbenzenesulfonate according to general procedure A3.

$^1\text{H NMR}$  (500 MHz,  $\text{CDCl}_3$ )  $\delta$  7.77 (d,  $J = 8.2$  Hz, 2H), 7.48 – 7.40 (m, 2H), 7.33 (d,  $J = 8.1$  Hz, 2H), 7.19/7.13\* (d,  $J = 8.3$  Hz, 2H), 5.60/5.46\* (dt,  $J = 17.2, 9.8$  Hz, 1H), 5.27 – 5.21/5.10 – 5.03\* (m, 1H), 5.15/4.98\* (d,  $J = 17.1$  Hz, 1H), 4.56\*/4.35 (d,  $J = 5.8$  Hz\*/7.6 Hz, 1H), 4.04 – 3.94 (m, 2H), 2.44 (s, 3H), 2.37 – 2.28\*/2.24 – 2.16 (m, 1H), 2.09 (s, 1H), 1.65 – 1.54 (m, 2H), 1.54 – 1.44 (m, 1H), 1.34 – 1.01 (m, 9H).

$^{13}\text{C NMR}$  (125 MHz,  $\text{CDCl}_3$ )  $\delta$  144.7, 141.70\*/141.66, 138.9/138.3\*, 133.3, 131.4/131.2\*, 129.9, 128.8/128.5\*, 128.0, 121.5/121.2\*, 119.3/117.8\*, 76.4\*/76.1, 70.8\*/70.7, 52.9/51.4\*, 30.4/29.5\*, 29.4\*/29.2, 28.90, 28.88, 27.14\*/27.12, 25.4\*/25.3, 21.7.

**HRMS** (ESI) calcd for  $\text{C}_{24}\text{H}_{30}\text{O}_3\text{BrS}$   $[\text{M}-\text{OH}]^+$ : 477.1093, found: 477.1104.

#### 42. 1-(4-Bromophenyl)-9-((tert-butyldimethylsilyloxy)-2-vinyl)nonan-1-ol (**5e**, wyd-6-180)

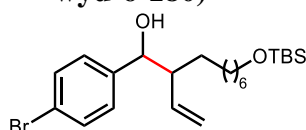

Compound **5e** was prepared as a pale yellow oil (82 mg, 90% yield, 4.3:1 d.r., eluent: 20:1 hexanes/EtOAc) from *tert*-butyl(dec-9-en-1-yloxy)dimethylsilane according to general procedure A3.

$^1\text{H NMR}$  (400 MHz,  $\text{CDCl}_3$ )  $\delta$  7.49 – 7.40 (m, 2H), 7.19/7.14\* (d,  $J = 8.2$  Hz, 2H), 5.68 – 5.55/5.53 – 5.39\* (m, 1H), 5.25/5.08\* (d,  $J = 10.1$  Hz, 1H), 5.17/5.00\* (d,  $J = 17.2$  Hz, 1H), 4.57\*/4.34 (d,  $J = 5.1$  Hz\*/7.7 Hz, 1H), 3.62 – 3.53 (m, 2H), 2.44 – 2.02 (m, 2H), 1.57 – 1.40 (m, 3H), 1.38 – 1.06 (m, 9H), 0.89 (s, 9H), 0.04 (s, 6H).

$^{13}\text{C NMR}$  (100 MHz,  $\text{CDCl}_3$ )  $\delta$  141.6, 139.1/138.3\*, 131.4/131.2\*, 128.8/128.6\*, 121.5/121.3\*, 119.4/117.9\*, 76.4\*/76.2, 63.4, 53.0/51.5\*, 33.0, 30.5/29.72\*, 29.66\*/29.54, 29.47\*/29.4, 27.32\*/27.27, 26.1, 25.9\*/25.8, 18.5, –5.1.

**HRMS** (ESI) calcd for  $\text{C}_{23}\text{H}_{38}\text{OBrSi}$   $[\text{M}-\text{OH}]^+$ : 437.1870, found: 437.1861.

**43. 1-(4-Bromophenyl)-7-(4-(4,4,5,5-tetramethyl-1,3,2-dioxaborolan-2-yl)phenoxy)-2-vinylheptan-1-ol (5f, wyd-6-171)**

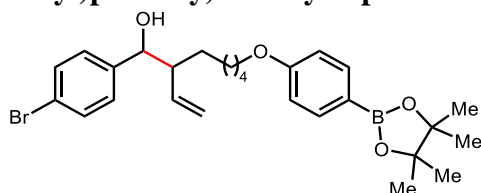

Compound **5f** was prepared as a pale yellow oil (88 mg, 85% yield, 4.0:1 d.r., eluent: 7:1 hexanes/EtOAc) from 4,4,5,5-tetramethyl-2-(4-(oct-7-en-1-yloxy)phenyl)-1,3,2-dioxaborolane (**f**) according to general procedure A3.

**<sup>1</sup>H NMR** (500 MHz, CDCl<sub>3</sub>) δ 7.77 – 7.70 (m, 2H), 7.49 – 7.41 (m, 2H), 7.19/7.14\* (d, *J* = 8.3 Hz, 2H), 6.91 – 6.82 (m, 2H), 5.67 – 5.57/5.54 – 5.40\* (m, 1H), 5.26/5.08\* (dd, *J* = 10.2, 1.6 Hz, 1H), 5.21 – 5.14/5.04 – 4.97\* (m, 1H), 4.58\*/4.36 (d, *J* = 5.7 Hz\*/7.7 Hz, 1H), 4.01 – 3.87 (m, 2H), 2.42 – 2.32 (m, 0.8H), 2.29 – 2.19 (m, 0.2H), 2.07 (s, 1H), 1.82 – 1.63 (m, 2H), 1.62 – 1.51 (m, 1H), 1.50 – 1.36 (m, 3H), 1.33 (s, 12H), 1.28 – 1.16 (m, 2H).

**<sup>13</sup>C NMR** (125 MHz, CDCl<sub>3</sub>) δ 161.81\*/161.77, 141.65\*/141.60, 138.9/138.2\*, 136.6, 131.5/131.2\*, 128.8/128.6\*, 121.6/121.3\*, 119.4, 118.0, 113.98\*/113.96, 83.6, 76.4\*/76.2, 67.74\*/67.67, 52.9/51.4\*, 30.4/29.5\*, 29.21\*/29.16, 27.10\*/27.07, 26.1\*/26.0, 25.0.

**HRMS** (ESI) calcd for C<sub>27</sub>H<sub>35</sub>O<sub>3</sub>BBr [M–OH]<sup>+</sup>: 497.1857, found: 497.1832.

**44. 3-((4-Bromophenyl)(hydroxy)methyl)pent-4-en-1-yl benzoate (5g, wyd-6-152-2)**

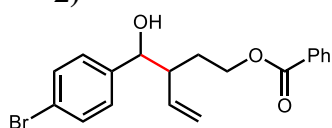

Compound **5g** was prepared as a pale yellow oil (69 mg, 92% yield, 3.4:1 d.r., eluent: 10:1 hexanes/EtOAc) from pent-4-en-1-yl benzoate according to general procedure A3.

**<sup>1</sup>H NMR** (500 MHz, CDCl<sub>3</sub>) δ 8.02 – 7.91 (m, 2H), 7.56 (t, *J* = 7.4 Hz, 1H), 7.50 – 7.37 (m, 4H), 7.24 – 7.12 (m, 2H), 5.77 – 5.53 (m, 1H), 5.29/5.14\* (d, *J* = 10.2 Hz, 1H), 5.20/5.07\* (d, *J* = 17.1 Hz, 1H), 4.66\*/4.49 (d, *J* = 4.4 Hz\*/7.2 Hz, 1H), 4.40 – 4.28 (m, 1H), 4.27 – 4.13 (m, 1H), 2.65 – 2.54\*/2.54 – 2.45 (m, 1H), 2.37 – 2.15 (m, 1H), 2.14 – 2.01 (m, 1H), 1.81 – 1.60 (m, 1H).

**<sup>13</sup>C NMR** (125 MHz, CDCl<sub>3</sub>) δ 166.7\*/166.6, 141.4\*/141.2, 137.4/137.2\*, 133.1/133.0\*, 131.6/131.4\*, 130.4\*/130.3, 129.65\*/129.63, 128.7/128.5\*, 128.5/128.4\*, 121.8/121.5\*, 120.1/118.6\*, 76.3\*/76.0, 63.2\*/63.0, 49.6/48.3\*, 29.6/28.5\*.

**HRMS** (ESI) calcd for C<sub>19</sub>H<sub>18</sub>O<sub>2</sub>Br [M–OH]<sup>+</sup>: 357.0485, found: 357.0492.

**45. 8-((4-Bromophenyl)(hydroxy)methyl)dec-9-en-1-yl thiophene-2-carboxylate (5h, wyd-6-168)**

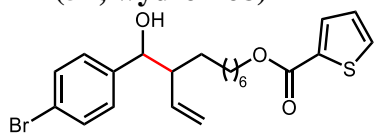

Compound **5h** was prepared as a pale yellow oil (86 mg, 95% yield, 4.3:1 d.r., eluent: 8:1 hexanes/EtOAc) from dec-9-en-1-yl thiophene-2-carboxylate according to general procedure A3.

**<sup>1</sup>H NMR** (500 MHz, CDCl<sub>3</sub>) δ 7.81 – 7.76 (m, 1H), 7.54 (d, *J* = 4.9 Hz, 1H), 7.49 – 7.41 (m, 2H), 7.19/7.14\* (d, *J* = 8.3 Hz, 2H), 7.11 – 7.07 (m, 1H), 5.66 – 5.56/5.52 – 5.41\* (m, 1H), 5.25/5.07\* (d, *J* = 10.2 Hz, 1H), 5.16/4.99\* (d, *J* = 17.1 Hz, 1H), 4.57\*/4.35 (d, *J* = 5.6 Hz\*/7.7 Hz, 1H), 4.31 – 4.22 (m, 2H), 2.40 – 2.30 (m, 0.8H), 2.26 – 2.18 (m, 0.2H), 2.09 (s, 1H), 1.78 – 1.64 (m, 2H), 1.56 – 1.46 (m, 1H), 1.45 – 1.04 (m, 9H).

**<sup>13</sup>C NMR** (125 MHz, CDCl<sub>3</sub>) δ 162.5, 141.7, 139.0/138.3\*, 134.2, 133.4, 132.3, 131.4/131.2\*, 128.8/128.6\*, 127.8, 121.5/121.2\*, 119.3/117.9\*, 76.4\*/76.1, 65.4\*/65.3, 52.9/51.5\*, 30.4/29.5\*, 29.5\*/29.4, 29.2\*/29.1, 28.8\*/28.7, 27.23\*/27.19, 26.0\*/25.9.

**HRMS** (ESI) calcd for C<sub>22</sub>H<sub>26</sub>O<sub>3</sub>BrS [M–H]<sup>+</sup>: 449.0780, found: 449.0813.

**46. *N*-(6-((4-Bromophenyl)(hydroxy)methyl)oct-7-en-1-yl)-4-methyl-*N*-(3-phenylprop-2-yn-1-yl)benzenesulfonamide (5i, wyd-6-178)**

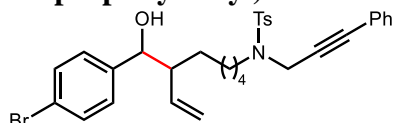

Compound **5i** was prepared as a pale yellow oil (88 mg, 76% yield, 3.5:1 d.r., eluent: 6:1 hexanes/EtOAc) from 4-methyl-*N*-(oct-7-en-1-yl)-*N*-(3-phenylprop-2-yn-1-yl)benzenesulfonamide (**i**) using Fp<sup>W5</sup>(thf)BF<sub>4</sub> (10 mol %) according to general procedure A3.

**<sup>1</sup>H NMR** (500 MHz, CDCl<sub>3</sub>) δ 7.79 – 7.69 (m, 2H), 7.49 – 7.40 (m, 2H), 7.32 – 7.16 (m, 6H), 7.13 (d, *J* = 8.3 Hz, 1H), 7.08 – 7.00 (m, 2H), 5.60\*/5.45 (dt, *J* = 17.2, 9.8 Hz, 1H), 5.24\*/5.06 (dd, *J* = 10.2, 1.5 Hz, 1H), 5.15\*/4.98 (d, *J* = 17.1 Hz, 1H), 4.56/4.35\* (d, *J* = 5.7 Hz/7.5 Hz\*, 1H), 4.30/4.28\* (s, 2H), 3.26 – 3.14 (m, 2H), 2.38 – 1.99 (m, 5H), 1.65 – 1.44 (m, 3H), 1.42 – 1.09 (m, 5H).

**<sup>13</sup>C NMR** (125 MHz, CDCl<sub>3</sub>, mixture of diastereomers) δ 143.4, 141.7, 138.8, 138.2, 136.1, 131.6, 131.5, 131.2, 129.6, 128.8, 128.6, 128.5, 128.2, 127.9, 122.3, 121.3, 119.4, 117.9, 85.6, 81.9, 76.4, 76.1, 52.8, 51.4, 46.4, 37.1, 30.3, 29.5, 27.5, 26.9, 26.6, 26.5, 21.5.

**HRMS** (ESI) calcd for C<sub>31</sub>H<sub>33</sub>O<sub>2</sub>NBrS [M–OH]<sup>+</sup>: 562.1410, found: 562.1395.

**47. 2-(6-((4-Bromophenyl)(hydroxy)methyl)oct-7-en-1-yl)isoindoline-1,3-dione (5j, wyd-6-163)**

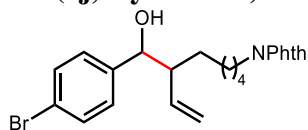

Compound **5j** was prepared as a pale yellow oil (81 mg, 92% yield, 4.6:1 d.r., eluent: 5:1 hexanes/EtOAc) from 2-(oct-7-en-1-yl)isoindoline-1,3-dione (**j**) according to general procedure A3.

**<sup>1</sup>H NMR** (500 MHz, CDCl<sub>3</sub>) δ 7.85 – 7.78 (m, 2H), 7.74 – 7.66 (m, 2H), 7.46 – 7.38 (m, 2H), 7.20 – 7.15/7.15 – 7.08\* (m, 2H), 5.64 – 5.53/5.50 – 5.38\* (m, 1H), 5.22/5.04\* (d, *J* = 10.1 Hz/10.3 Hz\*, 1H), 5.13/4.96\* (d, *J* = 17.1 Hz/17.2 Hz\*, 1H), 4.54\*/4.34 (d, *J* = 4.1 Hz\*/7.4 Hz, 1H), 3.68 – 3.57 (m, 2H), 2.40 – 2.15 (m, 2H), 1.69 – 1.45 (m, 3H), 1.44 – 1.04 (m, 5H).

**<sup>13</sup>C NMR** (125 MHz, CDCl<sub>3</sub>) δ 168.60\*/168.58, 141.7, 138.8/138.2\*, 134.0, 132.2, 131.4/131.2\*, 128.8/128.6\*, 123.3, 121.5/121.2\*, 119.3/117.9\*, 76.3\*/76.2, 52.7/51.4\*, 38.1\*/38.0, 30.3/29.4\*, 28.53\*/28.47, 26.9, 26.8\*/26.7.

**HRMS** (ESI) calcd for C<sub>23</sub>H<sub>23</sub>O<sub>3</sub>NBr [M–H]<sup>+</sup>: 440.0856, found: 440.0885.

**48. 2-(3-((4-Bromophenyl)(hydroxy)methyl)pent-4-en-1-yl)isoindoline-1,3-dione (5k, wyd-6-147-4)**

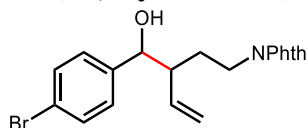

Compound **5k** was prepared as a white solid (76 mg, 95% yield, 3.9:1 d.r., eluent: 5:1 hexanes/EtOAc) from 2-(pent-4-en-1-yl)isoindoline-1,3-dione (**k**) according to general procedure A3.

**m.p.** = 92 – 94 °C.

**<sup>1</sup>H NMR** (500 MHz, CDCl<sub>3</sub>) δ 7.84 – 7.76 (m, 2H), 7.74 – 7.66 (m, 2H), 7.39 (d, *J* = 8.4 Hz, 2H), 7.18 – 7.09 (m, 2H), 5.73 – 5.63/5.63 – 5.53\* (m, 1H), 5.30 – 5.18/5.16 – 5.07\* (m, 2H), 4.59\*/4.47 (d, *J* = 5.9 Hz\*/8.9 Hz, 1H), 3.73 – 3.54 (m, 2H), 2.49 – 2.41\*/2.40 – 2.32 (m, 1H), 2.17 (s, 1H), 2.01 – 1.91 (m, 1H), 1.68 – 1.56 (m, 1H).

**<sup>13</sup>C NMR** (125 MHz, CDCl<sub>3</sub>) δ 168.5\*/168.4, 141.2\*/141.0, 137.4/137.1\*, 134.05/134.03\*, 132.2\*/132.1, 131.5/131.3\*, 128.6/128.4\*, 123.3, 121.7/121.5\*, 119.9/118.7\*, 76.2\*/75.7, 50.3/49.1\*, 36.5\*/36.4, 29.2/28.5\*.

**HRMS** (ESI) calcd for C<sub>20</sub>H<sub>17</sub>O<sub>2</sub>NBr [M–OH]<sup>+</sup>: 382.0437, found: 382.0446.

**49. 1-(4-Bromophenyl)-7-(dimethylamino)-2-vinylheptan-1-ol (5l, WRH-06-31)**

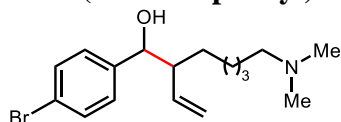

Compound **5l** was prepared as a pale yellow oil (46 mg, 68% yield, 2.6:1 d.r.) from *N,N*-dimethyloct-7-en-1-amine (**l**, 47 mg, 0.3 mmol, 1.5 equiv) using Fp<sup>W5</sup>(thf)BF<sub>4</sub> (10 mol %) and BF<sub>3</sub>•Et<sub>2</sub>O (74 μL, 0.6 mmol, 3.0 equiv) according to general procedure A3. The compound was purified by column chromatography (eluent: 1.5:1:0.25 hexanes/EtOAc/Et<sub>3</sub>N) followed by fast filtration through a pad of silica gel with EtOAc.

**<sup>1</sup>H NMR** (400 MHz, CDCl<sub>3</sub>) δ 7.50 – 7.41 (m, 2H), 7.19/7.14\* (d, *J* = 8.4 Hz, 2H), 5.66 – 5.54/5.53 – 5.41\* (m, 1H), 5.26/5.07\* (dd, *J* = 10.2, 1.6 Hz, 1H), 5.17/4.98\* (dd, *J* = 17.1, 1.5 Hz, 1H), 4.56\*/4.35 (d, *J* = 5.8 Hz\*/7.7 Hz, 1H), 2.87 – 2.74 (m, 2H), 2.55\*/2.53 (s, 6H), 2.38 – 2.02 (m, 2H), 1.67 – 1.47 (m, 3H), 1.43 – 1.05 (m, 5H).

**<sup>13</sup>C NMR** (100 MHz, CDCl<sub>3</sub>) δ 141.7\*/141.5, 138.7/138.1\*, 131.5/131.3\*, 128.8/128.5\*, 121.6/121.3\*, 119.6/118.1\*, 76.4\*/76.1, 58.5, 52.8, 51.4, 43.9, 30.1/29.1\*, 27.1, 26.9, 22.4\*/22.3. (mixture of diastereomers)

**HRMS** (ESI) calcd for C<sub>17</sub>H<sub>27</sub>ONBr [M+H]<sup>+</sup>: 340.1271, found: 340.1278.

**50. 1-(4-Bromophenyl)-7-(dibenzylamino)-2-vinylheptan-1-ol (5m, wrh-06-46B)**

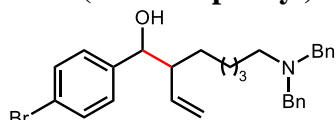

Compound **5m** was prepared as a pale yellow oil (62 mg, 63% yield, 3.7:1 d.r., eluent: 10:1 → 6:1 hexanes/EtOAc) from *N,N*-dibenzylhept-7-en-1-amine (**m**) using Fp<sup>W5</sup>(thf)BF<sub>4</sub> (10 mol %) according to general procedure A3.

**<sup>1</sup>H NMR** (400 MHz, CDCl<sub>3</sub>) δ 7.49 – 7.39 (m, 2H), 7.38 – 7.03 (m, 12H), 5.63 – 5.51/5.48 – 5.35\* (m, 1H), 5.23/5.05\* (d, *J* = 10.3 Hz, 1H), 5.13/4.96\* (d, *J* = 17.2 Hz,

1H), 4.55\*/4.32 (d,  $J = 5.5$  Hz\*/7.7 Hz, 1H), 3.52\*/3.50 (s, 4H), 2.43 – 2.11 (m, 3H), 2.08 – 1.88 (m, 1H), 1.54 – 1.32 (m, 2H), 1.31 – 0.97 (m, 6H).

$^{13}\text{C}$  NMR (100 MHz,  $\text{CDCl}_3$ )  $\delta$  141.7, 140.1, 138.9/138.3\*, 131.4/131.2\*, 128.9, 128.8/128.5\*, 128.2, 126.8, 121.5/121.2\*, 119.3/117.8\*, 76.3\*/76.1, 58.4, 53.4\*/53.3, 52.8/51.4\*, 30.4/29.5\*, 27.2\*/27.06, 27.15\*/27.0, 26.9.

HRMS (ESI) calcd for  $\text{C}_{29}\text{H}_{35}\text{ONBr}$   $[\text{M}+\text{H}]^+$ : 492.1896, found: 492.1910.

### 51. 1-(4-bromophenyl)-7-(piperidin-1-yl)-2-vinylheptan-1-ol (**5n**, wrh-06-47A)

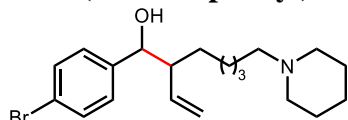

Compound **5n** was prepared as a pale yellow oil (46 mg, 60% yield, 2.7:1 d.r.) from 1-(oct-7-en-1-yl)piperidine (**n**, 59 mg, 0.3 mmol, 1.5 equiv) using  $\text{Fp}^{\text{W5}}(\text{thf})\text{BF}_4$  (10 mol %) and  $\text{BF}_3 \cdot \text{Et}_2\text{O}$  (74  $\mu\text{L}$ , 0.6 mmol, 3.0 equiv) according to general procedure A3. The compound was first purified by fast column chromatography (eluent: 2:1 hexanes/EtOAc). The product obtained was dissolved in EtOAc (10 mL) and was washed with 2 M NaOH ( $2 \times 5$  mL) and brine ( $1 \times 5$  mL) to remove the coordinated  $\text{BF}_3$ . The organic layer was dried over magnesium sulfate and concentrated in vacuo. The resulting mixture was purified again by column chromatography (eluent: 10:1:0.1 hexanes/EtOAc/ $\text{Et}_3\text{N}$ ) to afford the pure product **5n**.

$^1\text{H}$  NMR (400 MHz,  $\text{CDCl}_3$ )  $\delta$  7.51 – 7.37 (m, 2H), 7.19/7.14\* (d,  $J = 8.3$  Hz, 2H), 5.60/5.46\* (dt,  $J = 17.2, 9.8$  Hz, 1H), 5.24/5.06\* (dd,  $J = 10.2, 1.6$  Hz, 1H), 5.15/4.97\* (dd,  $J = 17.2, 1.2$  Hz, 1H), 4.56\*/4.35 (d,  $J = 5.7$  Hz/7.6 Hz, 1H), 2.48 – 2.29 (m, 4H), 2.29 – 2.14 (m, 3H), 1.66 – 1.64 (m, 4H), 1.53 – 1.37 (m, 4H), 1.35 – 1.05 (m, 7H).

$^{13}\text{C}$  NMR (100 MHz,  $\text{CDCl}_3$ )  $\delta$  142.1\*/141.9, 139.0/138.5\*, 131.4/131.1\*, 128.8/128.6\*, 121.4/121.1\*, 119.1/117.6\*, 76.3\*/76.0, 59.43\*/59.40, 54.5, 52.8/51.5\*, 30.3/29.5\*, 27.7\*/27.5, 27.2\*/27.1, 26.49\*/26.46, 25.71/25.67\*, 24.4.

HRMS (ESI) calcd for  $\text{C}_{20}\text{H}_{31}\text{ONBr}$   $[\text{M}+\text{H}]^+$ : 380.1584, found: 380.1594.

### 52. 1-(4-Bromophenyl)-7-((3-(10,11-dihydro-5H-dibenzo[a,d][7]annulen-5-ylidene)propyl)(methyl)amino)-2-vinylheptan-1-ol (**5o**, wrh-06-50B)

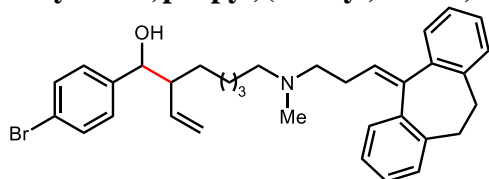

Compound **5o** was prepared as a pale yellow oil (62 mg, 55% yield, 2.8:1 d.r.) from *N*-(3-(10,11-dihydro-5H-dibenzo[a,d][7]annulen-5-ylidene)propyl)-*N*-methyl oct-7-en-1-amine (**o**, 112 mg, 0.3 mmol, 1.5 equiv) using  $\text{Fp}^{\text{W5}}(\text{thf})\text{BF}_4$  (10 mol %) and  $\text{BF}_3 \cdot \text{Et}_2\text{O}$  (74  $\mu\text{L}$ , 0.6 mmol, 3.0 equiv) according to general procedure A3. The compound was first purified by fast column chromatography (eluent: 2:1 hexanes/EtOAc). The product obtained was dissolved in EtOAc (10 mL) and was washed with 2 M NaOH ( $2 \times 5$  mL) and brine ( $1 \times 5$  mL) to remove the coordinated  $\text{BF}_3$ . The organic layer was dried over magnesium sulfate and concentrated in vacuo to obtain the pure product **5o**.

$^1\text{H}$  NMR (400 MHz,  $\text{CDCl}_3$ )  $\delta$  7.51 – 7.39 (m, 2H), 7.30 – 7.08 (m, 9H), 7.06 – 6.99 (m, 1H), 5.90 – 5.76 (m, 1H), 5.59/5.45\* (dt,  $J = 17.2, 9.8$  Hz, 1H), 5.24/5.06\* (dd,  $J = 10.2, 1.5$  Hz, 1H), 5.14/4.97\* (dd,  $J = 17.2, 1.1$  Hz, 1H), 4.53\*/4.33 (d,  $J = 5.7$



Hz\*/7.6 Hz, 1H), 3.52 – 3.20 (m, 2H), 3.07 – 2.85 (m, 1H), 2.84 – 2.65 (m, 1H), 2.52 – 2.36 (m, 2H), 2.36 – 2.17 (m, 5H), 2.13\*/2.10 (s, 3H), 1.55 – 1.44 (m, 1H), 1.41 – 1.03 (m, 8H).

<sup>13</sup>C NMR (100 MHz, CDCl<sub>3</sub>) δ 143.81\*/143.77, 142.0, 141.8/141.3\*, 140.1, 139.4, 138.9/138.4\*, 137.1, 131.3/131.1\*, 130.1, 129.2/129.1\*, 128.8/128.7\*, 128.6, 128.2, 128.1, 127.5, 127.1, 126.1, 125.8, 121.4/121.1\*, 119.0/117.6\*, 76.3\*/76.0, 57.3, 57.2/57.1\*, 52.7/51.5\*, 41.9, 33.9, 32.1, 30.4/29.5\*, 27.5\*/27.4, 27.2, 26.93/26.89\*, 26.8.

HRMS (ESI) calcd for C<sub>34</sub>H<sub>41</sub>ONBr [M+H]<sup>+</sup>: 558.2366, found: 558.2375.

### 53. (4-Bromophenyl)(1,2-dihydronaphthalen-2-yl)methanol (**5p**, wyd-6-193-2)

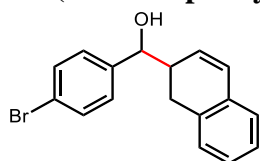

Compound **5p** was prepared as a pale yellow oil (51 mg, 81% yield, 1.3:1 d.r., eluent: 10:1 hexanes/EtOAc) from 1,2-dihydronaphthalene according to general procedure A3.

<sup>1</sup>H NMR (400 MHz, CDCl<sub>3</sub>) δ 7.53 – 7.45 (m, 2H), 7.24 – 6.96 (m, 6H), 6.59/6.50\* (dd, *J* = 9.7, 1.4 Hz, 1H), 6.16/5.56\* (dd, *J* = 9.7, 3.9 Hz/4.3 Hz\*, 1H), 4.60 – 4.50 (m, 1H), 3.02 (dd, *J* = 15.8, 8.3 Hz, 0.6H), 2.90 (dd, *J* = 15.8, 6.8 Hz, 0.6H), 2.79 – 2.68 (m, 1H), 2.68 – 2.60 (m, 0.4H), 2.53 (dd, *J* = 15.5, 9.2 Hz, 0.4H), 2.03 (s, 1H).

<sup>13</sup>C NMR (100 MHz, CDCl<sub>3</sub>) δ 142.0/141.9\*, 134.3\*/134.1, 133.8/133.6\*, 131.7/131.6\*, 129.5\*/129.2, 128.9/128.7\*, 128.5/128.3\*, 127.9, 127.6\*/127.5, 126.8/126.7\*, 126.21/126.19\*, 121.8/121.6\*, 76.6/75.1\*, 41.6\*/41.5, 30.9/29.4\*.

HRMS (ESI) calcd for C<sub>17</sub>H<sub>14</sub>OBr [M-H]<sup>+</sup>: 313.0223, found: 313.0216.

### 54. (4-Bromophenyl)(6,7-dihydro-5H-benzo[7]annulen-7-yl)methanol (**5q**, wyd-6-193-1)

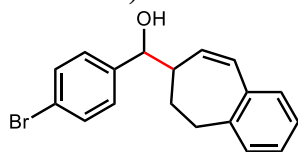

Compound **5q** was prepared as a pale yellow oil (50 mg, 76% yield, 2.0:1 d.r., eluent: 10:1 hexanes/EtOAc) from 6,7-dihydro-5H-benzo[7]annulene (**q**) according to general procedure A3.

<sup>1</sup>H NMR (400 MHz, CDCl<sub>3</sub>) δ 7.48 (d, *J* = 8.4 Hz, 2H), 7.25 – 7.05 (m, 6H), 6.60 – 6.48 (m, 1H), 5.97/5.70\* (dd, *J* = 12.2, 3.6 Hz, 1H), 4.74\*/4.62 (d, *J* = 5.6 Hz\*/6.2 Hz, 1H), 2.92 – 2.70 (m, 3H), 2.10 – 1.69 (m, 3H).

<sup>13</sup>C NMR (100 MHz, CDCl<sub>3</sub>) δ 142.4/142.0\*, 141.7\*/141.6, 136.0/135.5\*, 132.20, 132.18, 131.9, 131.6, 131.5, 131.1, 131.0, 130.8, 129.0\*/128.9, 128.2\*/128.0, 127.2\*/127.1, 126.23/126.20\*, 121.5/121.4\*, 77.0/76.3\*, 49.8\*/49.1, 33.7/33.5\*, 31.9/27.9\*. (mixture of diastereomers)

HRMS (ESI) calcd for C<sub>18</sub>H<sub>16</sub>OBr [M-H]<sup>+</sup>: 327.0379, found: 327.0379.

### 55. (6-Bromo-1,2-dihydronaphthalen-2-yl)(4-bromophenyl)methanol (**5r**, wyd-6-197-2)

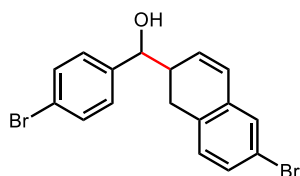

Compound **5r** was prepared as a pale yellow oil (68 mg, 86% yield, 1.0:1 d.r., eluent: 10:1 hexanes/EtOAc) from 6-bromo-1,2-dihydronaphthalene (**r**) according to general procedure A3.

$^1\text{H NMR}$  (400 MHz,  $\text{CDCl}_3$ )  $\delta$  7.46 – 7.36 (m, 2H), 7.22 – 7.06 (m, 4H), 6.91\*/6.77 (d,  $J = 8.0 \text{ Hz}^*/7.9 \text{ Hz}$ , 1H), 6.42\*/6.34 (dd,  $J = 9.7, 1.4 \text{ Hz}^*/1.3 \text{ Hz}$ , 1H), 6.14\*/5.53 (dd,  $J = 9.7, 3.9 \text{ Hz}^*/4.3 \text{ Hz}$ , 1H), 4.45 (t,  $J = 8.2 \text{ Hz}$ , 1H), 2.89\*/2.75 (dd,  $J = 15.8, 8.1 \text{ Hz}^*/6.8 \text{ Hz}$ , 1H), 2.70 – 2.59 (m, 1H), 2.49\*/2.38 (dd,  $J = 15.8, 6.8 \text{ Hz}^*/9.4 \text{ Hz}$ , 1H), 1.92 (s, 1H).

$^{13}\text{C NMR}$  (100 MHz,  $\text{CDCl}_3$ )  $\delta$  141.8\*/141.7, 135.7\*/135.5, 133.1\*/132.9, 131.8\*/131.6, 130.6, 130.3, 130.2, 130.1, 129.8, 129.4, 128.9, 128.5, 128.3, 128.2, 128.0, 121.9\*/121.8, 120.2\*/120.1, 76.5\*/74.9, 41.41\*/41.37, 30.3\*/28.8. (mixture of diastereomers)

**HRMS** (ESI) calcd for  $\text{C}_{18}\text{H}_{15}\text{O}_3\text{Br}_2$   $[\text{M}+\text{HCOO}]^+$ : 436.9382, found: 436.9396.

#### 56. (4-Bromophenyl)(8-methoxy-1,2-dihydronaphthalen-2-yl)methanol (**5s**, wyd-6-198)

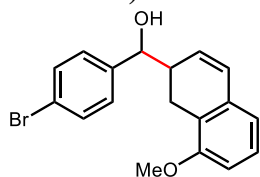

Compound **5s** was prepared as a pale yellow oil (57 mg, 83% yield, 1.7:1 d.r., eluent: 10:1 → 8:1 hexanes/EtOAc) from 1,2-dihydro-8-methoxynaphthalene (**s**) according to general procedure A3.

$^1\text{H NMR}$  (400 MHz,  $\text{CDCl}_3$ )  $\delta$  7.51 – 7.43 (m, 2H), 7.24 – 7.17 (m, 2H), 7.17 – 7.08 (m, 1H), 6.81 – 6.65 (m, 2H), 6.55/6.46\* (dd,  $J = 9.7, 1.4 \text{ Hz}/1.7 \text{ Hz}^*$ , 1H), 6.10/5.58\* (dd,  $J = 9.7, 3.7 \text{ Hz}/4.3 \text{ Hz}^*$ , 1H), 4.58/4.53\* (d,  $J = 6.5 \text{ Hz}/7.5 \text{ Hz}^*$ , 1H), 3.82\*/3.79 (s, 3H), 3.01 (dd,  $J = 16.6, 8.2 \text{ Hz}, 0.6\text{H}$ ), 2.89 (dd,  $J = 16.6, 7.3 \text{ Hz}, 0.6\text{H}$ ), 2.79 – 2.67 (m, 1.4H), 2.64 – 2.53 (m, 0.4H), 2.11 (s, 1H).

$^{13}\text{C NMR}$  (100 MHz,  $\text{CDCl}_3$ )  $\delta$  156.7\*/156.3, 142.0/141.9\*, 134.6/134.5\*, 131.52/131.49\*, 129.30\*/129.26, 128.8/128.63\*, 128.60/128.2\*, 127.0/126.9\*, 121.8, 121.6, 119.2, 110.3\*/110.1, 76.7/75.5\*, 55.6\*/55.5, 41.13\*/41.11, 23.1/21.7\*.

**HRMS** (ESI) calcd for  $\text{C}_{18}\text{H}_{16}\text{O}_2\text{Br}$   $[\text{M}-\text{H}]^+$ : 343.0328, found: 343.0329.

#### 57. 1-(4-Bromophenyl)-4-phenylbut-3-en-1-ol (**5t**, wrh-05-124A)

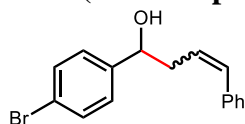

Compound **5t** was prepared as a pale yellow solid (50 mg, 82% yield, 1:2.2 *Z/E*, eluent: 15:1 → 8:1 hexanes/EtOAc) from *cis*- $\beta$ -methylstyrene according to general procedure A3.

**m.p.** = 103 – 105 °C.

$^1\text{H NMR}$  (500 MHz,  $\text{CDCl}_3$ )  $\delta$  7.51 – 7.43 (m, 2H), 7.37 – 7.18 (m, 7H), 6.58\*/6.49 (d,  $J = 11.7 \text{ Hz}^*/15.9 \text{ Hz}$ , 1H), 6.19 – 6.11/5.67\* (m/dt\*,  $J = 11.7, 7.3 \text{ Hz}$ , 1H), 4.80 – 4.73 (m, 1H), 2.90 – 2.55 (m, 2H), 2.10/2.00\* (s, 1H).

**<sup>13</sup>C NMR** (125 MHz, CDCl<sub>3</sub>, mixture of *Z* and *E* isomers) δ 143.0, 137.2, 134.0, 132.3\*/131.7, 128.8, 128.7, 128.4, 127.8, 127.7, 127.6, 127.3, 127.1, 126.3/125.4\*, 121.6\*/121.5, 73.7\*/73.2, 43.2/38.3\*.

**HRMS** (ESI) calcd for C<sub>16</sub>H<sub>14</sub>Br [M-OH]<sup>+</sup>: 285.0273, found: 285.0280.

## Unsuccessful substrates

The substrates listed below were tried in propylene functionalization reactions with no product or low yields.

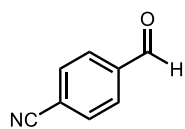

N.P.

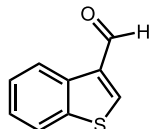

13% NMR yield

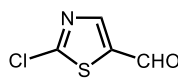

N.P.

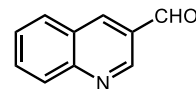

13% NMR yield

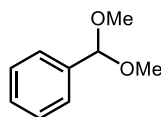

N.P.

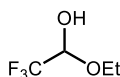

N.P.

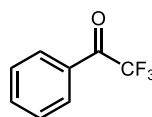

N.P.

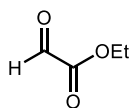

N.P.

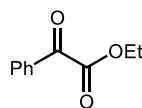

N.P.

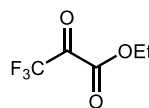

N.P.

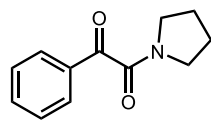

N.P.

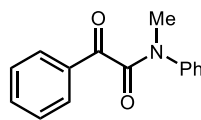

N.P.

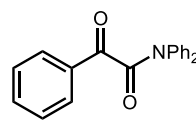

N.P.

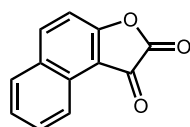

15% NMR yield

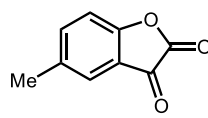

N.P.

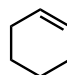

trace

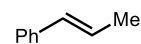

N.P.

## Synthesis and characterization data of iron complexes

### Synthesis of ligands (L2–L6)

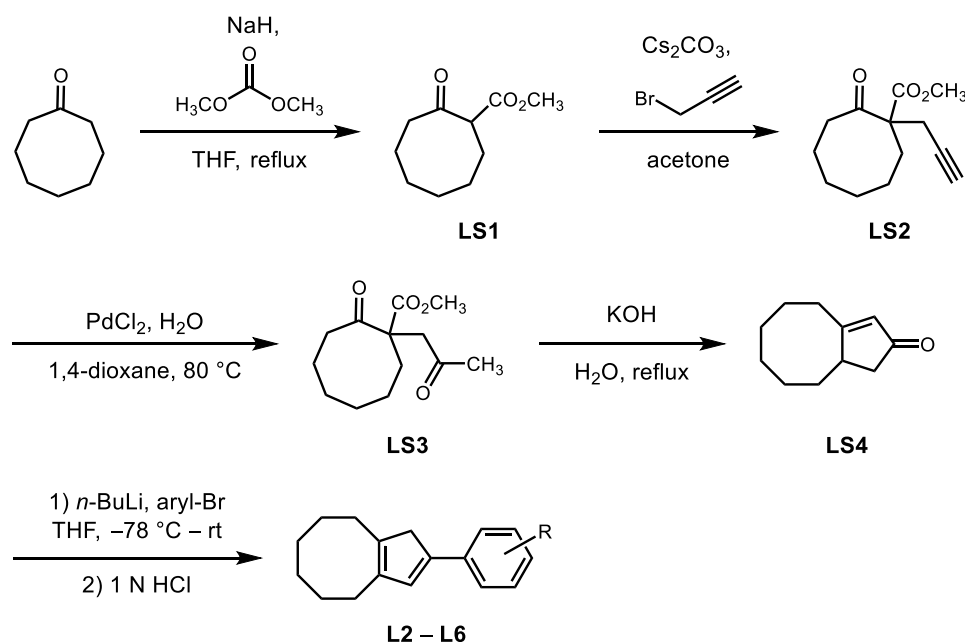

A 500 mL three-necked round bottom flask was fitted with a reflux condenser and a 125 mL pressure-equalizing dropping funnel containing cyclooctanone (12.6 g, 100 mmol, 1.0 equiv) and 100 mL of anhydrous THF. The reaction vessel was charged with NaH (8.00 g, 200 mmol, 2.0 equiv, 60% oil dispersion), dimethyl carbonate (17 mL, 200 mmol, 2.0 equiv) and 100 mL of dry THF under a flow of nitrogen. The flask was placed in an oil bath preheated at 76 °C. The ketone solution was added slowly to the flask at reflux with stirring. After the addition was completed, the reaction mixture was heated at reflux for 6 h. Then the mixture was cooled to room temperature, quenched by adding 1 N HCl solution dropwise at 0 °C until no bubbles were formed, and extracted with EtOAc (2 × 200 mL). The combined organic layers were dried over magnesium sulfate and the solvent was removed by rotary evaporation. The crude product **LS1** was used in the next step without purification.

Propargyl bromide (17 mL, 200 mmol, 2.0 equiv) was added to the solution of compound **LS1** obtained in the last step and Cs<sub>2</sub>CO<sub>3</sub> (47.9 g, 150 mmol, 1.5 equiv) in 250 mL of acetone, previously dried over magnesium sulfate for 2 h. The reaction mixture was stirred at room temperature overnight. Solid material was removed by vacuum filtration, and the filtrate was concentrated under reduced pressure. The crude residue was purified by column chromatography (gradient elution from 50:1 to 10:1 hexanes/EtOAc) to obtain compound **LS2** as a pale yellow liquid (22.2 g, 100% yield). <sup>1</sup>H NMR data were in agreement with the literature.<sup>2</sup>

A 500 mL round bottom flask was charged with PdCl<sub>2</sub> (355 mg, 2.0 mmol, 2 mol %), compound **LS2** (22.2 g, 100 mmol, 1.0 equiv), water (5 mL, 50 mg/mmol) and 250 mL of 1,4-dioxane under a flow of nitrogen. The reaction mixture was heated at 80 °C for 3 h. After the reaction was complete, the flask was allowed to cool to room temperature. The crude residue was purified by column chromatography (gradient elution from 50:1 to 3:1) to afford compound **LS3** as a yellow oil (24.0 g, 100% yield). <sup>1</sup>H NMR data were in agreement with the literature.<sup>3</sup>

Compound **LS4** was synthesized according to literature procedure.<sup>3</sup>

*n*-BuLi (2.2 mL, 5.5 mmol, 1.1 equiv, 2.5 M in hexanes) was added dropwise to the solution of aryl bromide (1.1 equiv, 0.3 M) in anhydrous THF at  $-78\text{ }^{\circ}\text{C}$  under nitrogen. The reaction mixture was stirred at  $-78\text{ }^{\circ}\text{C}$  for 1 h, then compound **LS4** (821 mg, 5.0 mmol, 1.0 equiv) was added dropwise. The mixture was gradually warmed to room temperature and was stirred overnight. After completion, aqueous HCl (1 M, 10 mL) was added to the reaction mixture with vigorous stirring for 10 min. Then the resulting mixture was transferred to a separatory funnel and extracted with EtOAc ( $4 \times 20\text{ mL}$ ). The combined organic layers were dried over magnesium sulfate and concentrated under reduced pressure. Purification by column chromatography afforded ligands **L2–L6** as a mixture of cyclopentadiene isomers, which were used in the next step without further purification.

### 2-Phenyl-4,5,6,7,8,9-hexahydro-1*H*-cyclopenta[8]annulene (**L2**, PBS-03-1)

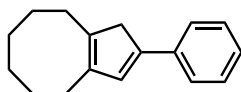

This compound was prepared as a pale yellow solid (954 mg, 85% yield, eluent: hexanes) using bromobenzene as the aryl bromide in the last step.

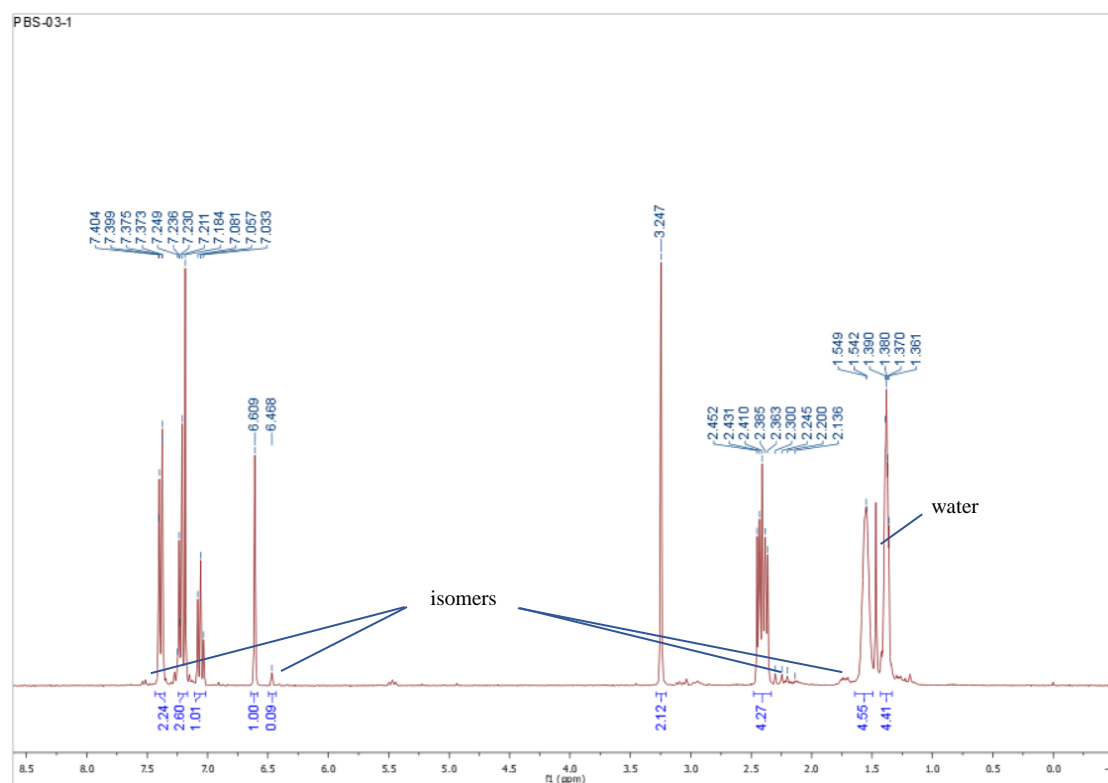

### 2-(4-Methoxyphenyl)-4,5,6,7,8,9-hexahydro-1*H*-cyclopenta[8]annulene (**L3**, wrh-80Me)

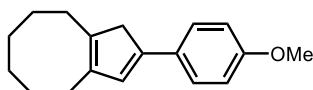

This compound was prepared as a pale yellow solid (866 mg, 68% yield, eluent: 100:1 hexanes/EtOAc) using 4-bromoanisole as the aryl bromide in the last step.

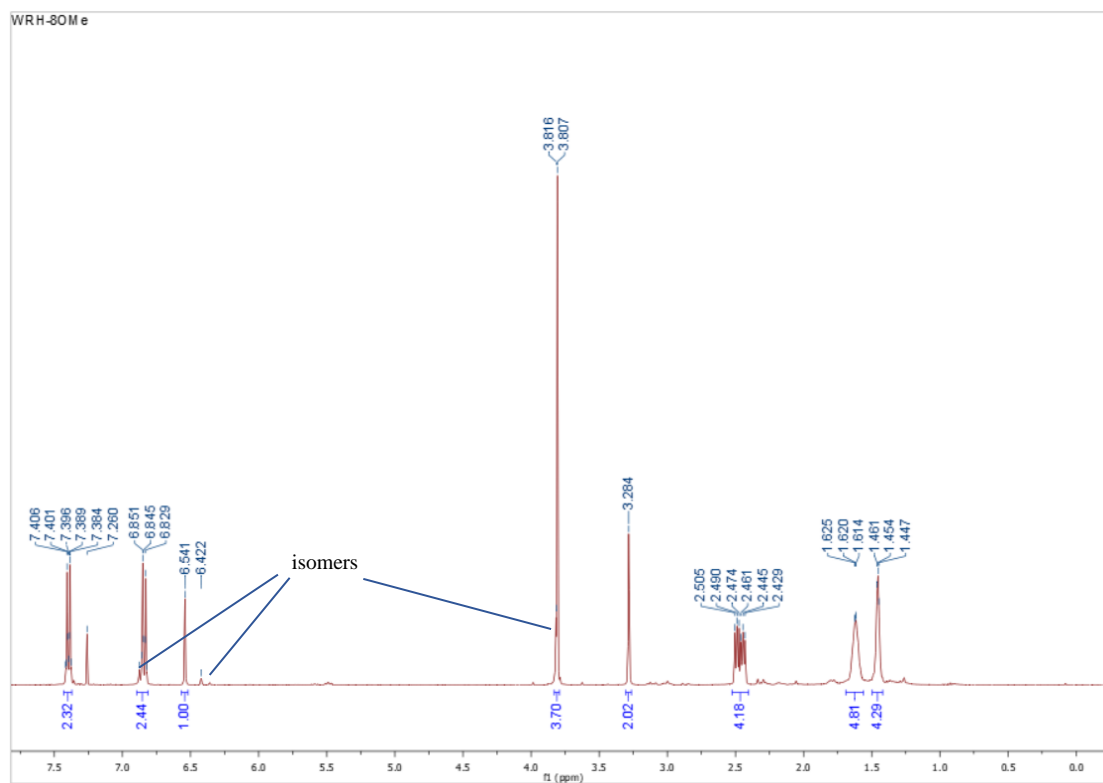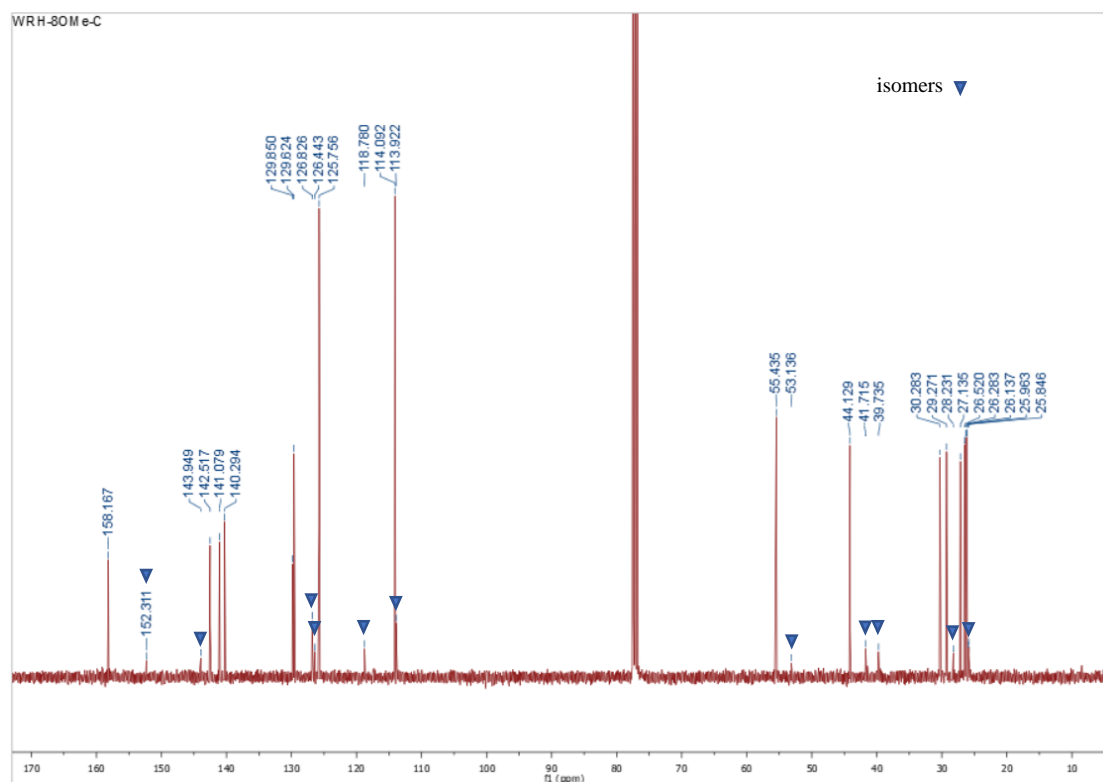

**2-(4-(Trifluoromethyl)phenyl)-4,5,6,7,8,9-hexahydro-1H-cyclopenta[8]annulene (L4, wrh-05-3)**

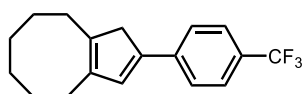

This compound was prepared as a pale yellow solid (1.01 g, 69% yield, eluent: hexanes) using 4-bromobenzotrifluoride as the aryl bromide in the last step.

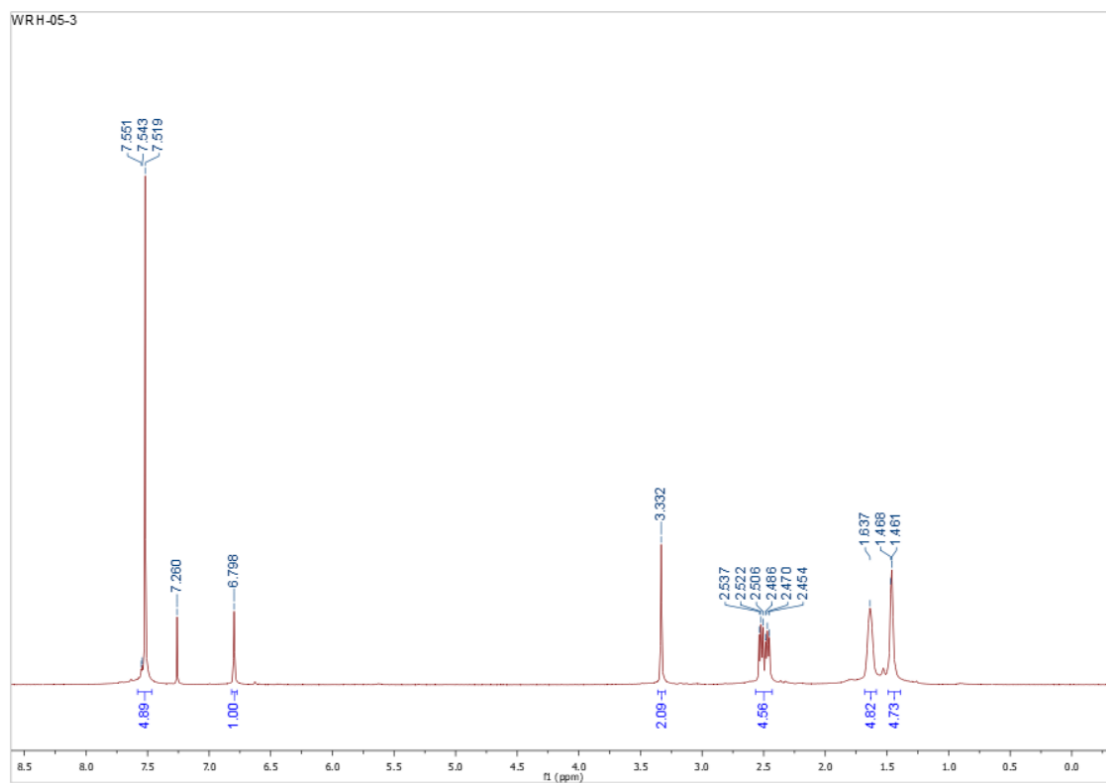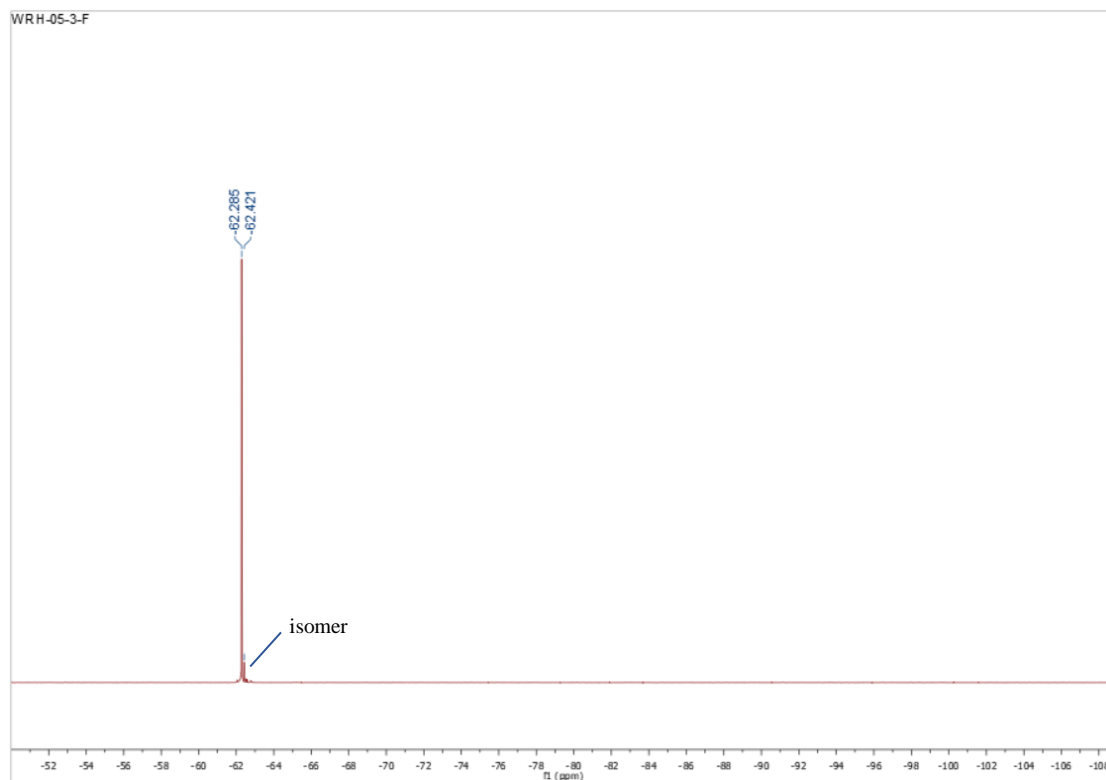

**2-(4-Methoxy-3,5-dimethylphenyl)-4,5,6,7,8,9-hexahydro-1H-cyclopenta[8]annulene (L5, PBS-29-2)**

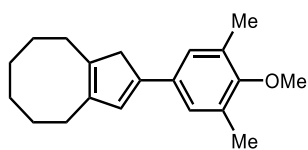



This compound was prepared as a yellow oil (1.11 g, 79% yield, eluent: 80:1 hexanes/EtOAc) using 4-bromo-2,6-dimethylanisole as the aryl bromide in the last step.

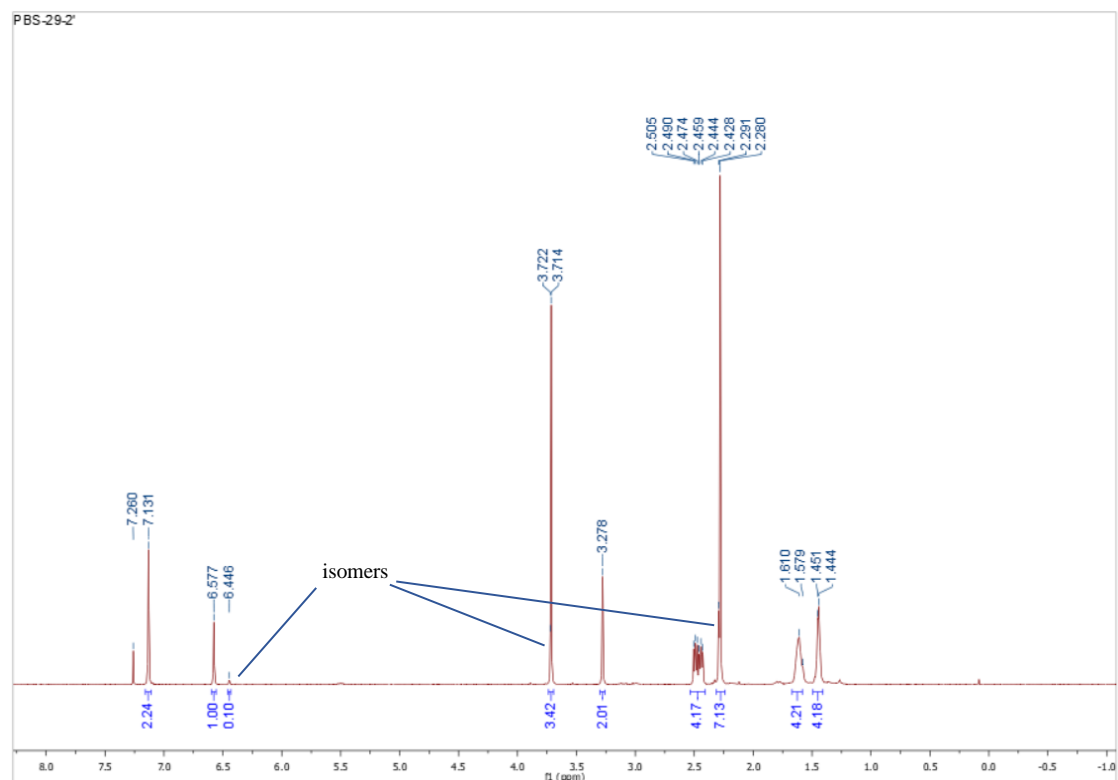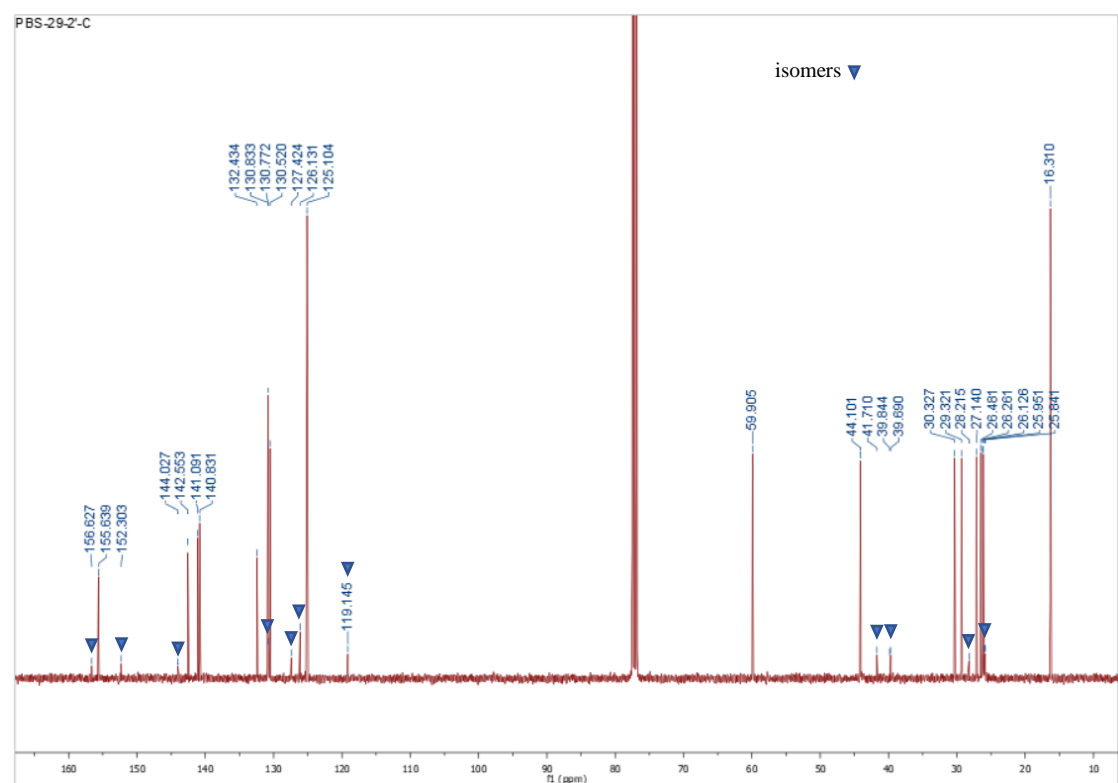

**2-(4-Methoxy-2-methylphenyl)-4,5,6,7,8,9-hexahydro-1H-cyclopenta[8]annulene (L6, JZ-6-161-3)**

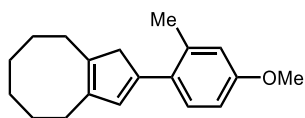

This compound was prepared as a pale yellow solid (844 mg, 63% yield, eluent: 50:1 hexanes/EtOAc) using 4-bromo-3-methylanisole as the aryl bromide in the last step.

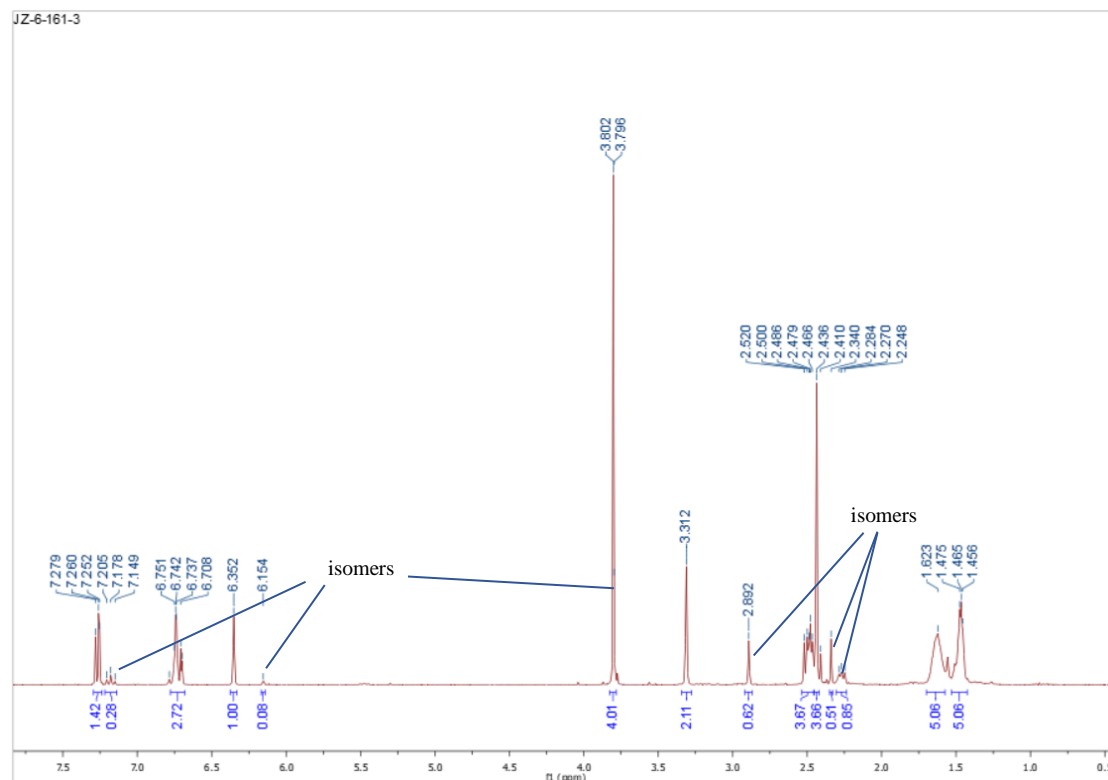

### Synthesis of ligand L1

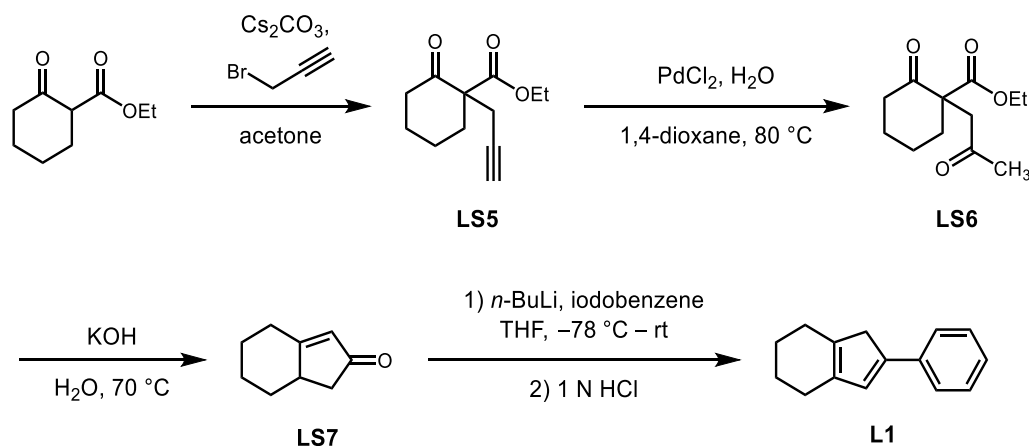

Propargyl bromide (8.5 mL, 100 mmol, 2.0 equiv) was added to the solution of ethyl 2-oxocyclohexanecarboxylate (7.9 mL, 50 mmol, 1.0 equiv) and  $\text{Cs}_2\text{CO}_3$  (24.4 g, 75 mmol, 1.5 equiv) in 150 mL of acetone, previously dried over magnesium sulfate for 2 h. The reaction mixture was stirred at room temperature overnight. Solid material was removed by vacuum filtration, and the filtrate was concentrated under reduced pressure. The crude residue was purified by column chromatography (gradient elution from 40:1 to 10:1 hexanes/EtOAc) to obtain compound **LS5** as a colorless liquid (8.54 g, 82% yield).  $^1\text{H}$  NMR data were in agreement with the literature.<sup>4</sup>

A 250 mL round bottom flask was charged with PdCl<sub>2</sub> (145 mg, 0.8 mmol, 2 mol %), compound **LS5** (8.54 g, 41 mmol 1.0 equiv), water (2.0 mL, 50 mg/mmol) and 120 mL of 1,4-dioxane under a flow of nitrogen. The reaction mixture was heated at 80 °C for 3 h. After the reaction was complete, the flask was allowed to cool to room temperature. The crude residue was purified by column chromatography (5:1 → 3:1 hexanes/EtOAc) to afford compound **LS6** as a yellow oil (9.00 g, 97% yield). <sup>1</sup>H NMR data were in agreement with the literature.<sup>2</sup>

A 500 mL round bottom flask was charged with compound **LS6** (2.26 g, 10 mmol), 15% aqueous KOH solution (25 mL, 2.5 mL/mmol) and 200 mL of water (20 mL/mmol). The reaction mixture was heated at 70 °C for 2 h. After cooling to room temperature, the mixture was extracted with CH<sub>2</sub>Cl<sub>2</sub> (4 × 200 mL). The combined organic layers were dried over magnesium sulfate and concentrated under reduced pressure. The mixture was purified by column chromatography (5:1 hexanes/EtOAc) to give compound **LS7** as a pale yellow liquid (1.18 g, 87% yield). <sup>1</sup>H NMR data were in agreement with the literature.<sup>3</sup>

*n*-BuLi (2.2 mL, 5.5 mmol, 1.1 equiv, 2.5 M in hexanes) was added dropwise to the solution of bromobenzene (0.58 mL, 5.5 mmol, 1.1 equiv, 0.3 M) in anhydrous THF at -78 °C under nitrogen. The reaction mixture was stirred at -78 °C for 1 h, then compound **LS7** (681 mg, 5.0 mmol, 1.0 equiv) was added dropwise. The mixture was gradually warmed to room temperature and was stirred overnight. After completion, aqueous HCl (1 M, 10 mL) was added to the reaction mixture with vigorous stirring for 5 min. The resulting mixture was transferred to a separatory funnel and extracted with EtOAc (4 × 20 mL). The combined organic layers were dried over magnesium sulfate and concentrated under reduced pressure. Purification by column chromatography (hexanes) afforded ligand **L1** as a white crystalline solid (745 mg, 76% yield). <sup>1</sup>H NMR data were in agreement with the literature.<sup>5</sup>

### Synthesis of iron complexes

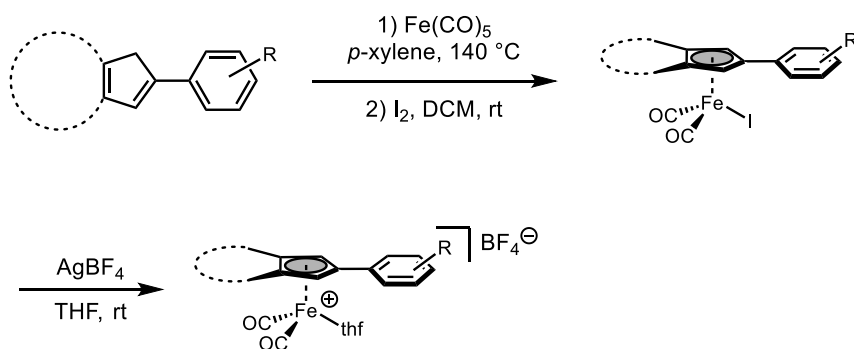

A solution of ligand (2.4–3.7 mmol, 1.0 equiv, 0.5 M) and pentacarbonyliron(0) (3.0 equiv) in *p*-xylene was thoroughly deoxygenated and heated at reflux under nitrogen for 20 h. Then the mixture was cooled to room temperature, the solvent was removed by rotary evaporation. The residue was dissolved in CH<sub>2</sub>Cl<sub>2</sub> (0.2 M) and was treated with iodine (1.0 equiv). After stirring at room temperature for 2 h, the mixture was filtered through a pad of celite to remove insoluble solid material. The filtrate was washed with saturated Na<sub>2</sub>SO<sub>3</sub> solution (5 × 5 mL). The organic layer was dried over magnesium sulfate and concentrated *in vacuo*. Column chromatography on silica gel or recrystallization afforded the iron-iodide complex.

A flame-dried flask was charged with iron-iodide complex (0.5 or 1.0 mmol, 1.0 equiv, 0.2 M), AgBF<sub>4</sub> (1.0 equiv) and anhydrous THF in an argon-filled glovebox.

The reaction mixture was stirred at room temperature for 6 h. After completion, the solvent was removed by rotary evaporation. The residue was dissolved in dry CH<sub>2</sub>Cl<sub>2</sub> (10 mL) and filtered through a pad of celite to remove silver iodide. The catalysts were obtained with two methods depending on the feasibility of recrystallization.

**Method A:** The filtrate was concentrated until approximately 1 mL of CH<sub>2</sub>Cl<sub>2</sub> remained, then dry diethyl ether (10 mL) was added until large amounts of crystalline material were precipitated. The crystals were collected by vacuum filtration, washed with dry diethyl ether, and dried *in vacuo* for 10 min.

**Method B:** The solvent of the filtrate was removed under reduced pressure. Dry diethyl ether (5 mL) was added to wash the residue and was decanted. This step was repeated five times. The residual solvent was removed *in vacuo* for 30 min. Work-up and purification before drying under vacuum should be carried out as quickly as possible, preferably within 15 min.

### Characterization data for Cp<sup>x</sup>Fe(CO)<sub>2</sub>I complexes

#### Cp<sup>W1</sup>Fe(CO)<sub>2</sub>I (ZJ-6-84-3)

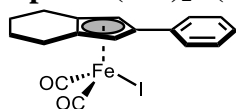

This compound was synthesized on the scale of 3.7 mmol. Product was purified by recrystallization using CH<sub>2</sub>Cl<sub>2</sub> (2 mL) and hexanes (10 mL) to afford a dark brown solid (940 mg, 58% yield).

<sup>1</sup>H NMR (500 MHz, CDCl<sub>3</sub>) δ 7.63 – 7.31 (m, 5H), 4.95 (s, 2H), 3.04 – 2.72 (m, 2H), 2.71 – 2.41 (m, 2H), 2.10 – 1.65 (m, 4H).

<sup>13</sup>C NMR (75 MHz, CDCl<sub>3</sub>) δ 214.4, 130.9, 129.5, 129.1, 126.7, 104.1, 100.7, 76.1, 23.1, 22.2.

HRMS (ESI) calcd for C<sub>17</sub>H<sub>16</sub>O<sub>2</sub>FeI [M+H]<sup>+</sup>: 434.9539, found: 434.9530.

IR (ATR, neat):  $\tilde{\nu}(\text{CO}) = 2017, 1980 \text{ cm}^{-1}$ .

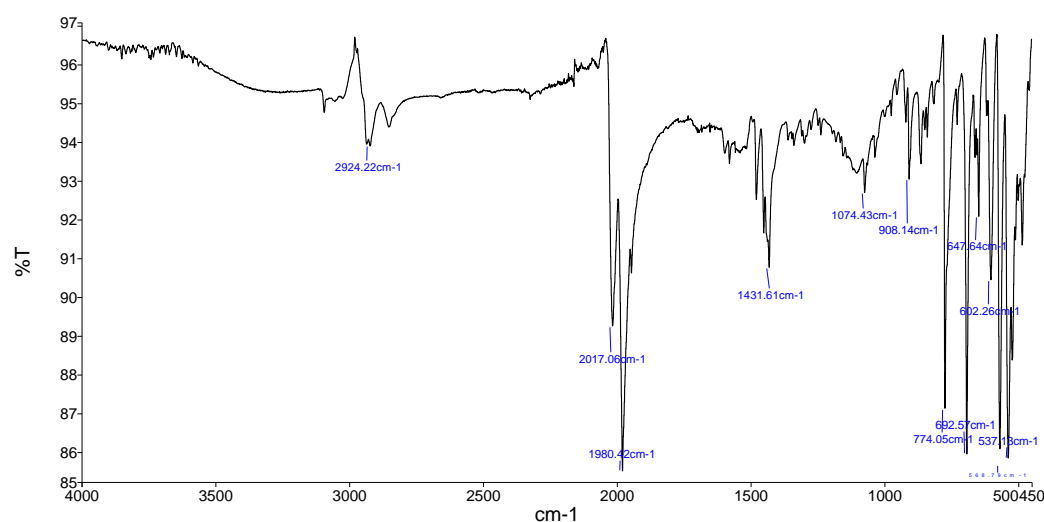

#### Cp<sup>W2</sup>Fe(CO)<sub>2</sub>I (wrh-8Ph)

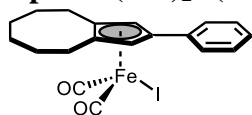

This compound was synthesized on the scale of 3.4 mmol. Purification by column chromatography (50:1 → 20:1 hexanes/EtOAc) afforded the product as a black solid (1.0 g, 63% yield).

$^1\text{H NMR}$  (400 MHz,  $\text{CDCl}_3$ )  $\delta$  7.60 – 7.45 (m, 2H), 7.45 – 7.30 (m, 3H), 5.16 (s, 2H), 2.70 – 2.40 (m, 4H), 2.04 – 1.82 (m, 2H), 1.69 – 1.34 (m, 6H).

$^{13}\text{C NMR}$  (100 MHz,  $\text{CDCl}_3$ )  $\delta$  214.0, 130.8, 129.3, 129.1, 126.5, 104.1, 96.8, 81.5, 31.8, 26.1, 25.8.

**HRMS** (ESI) calcd for  $\text{C}_{19}\text{H}_{19}\text{O}_2\text{FeI}$   $[\text{M}]^+$ : 461.9774, found: 461.9778.

**IR** (ATR, neat):  $\tilde{\nu}(\text{CO}) = 2017, 1973 \text{ cm}^{-1}$ .

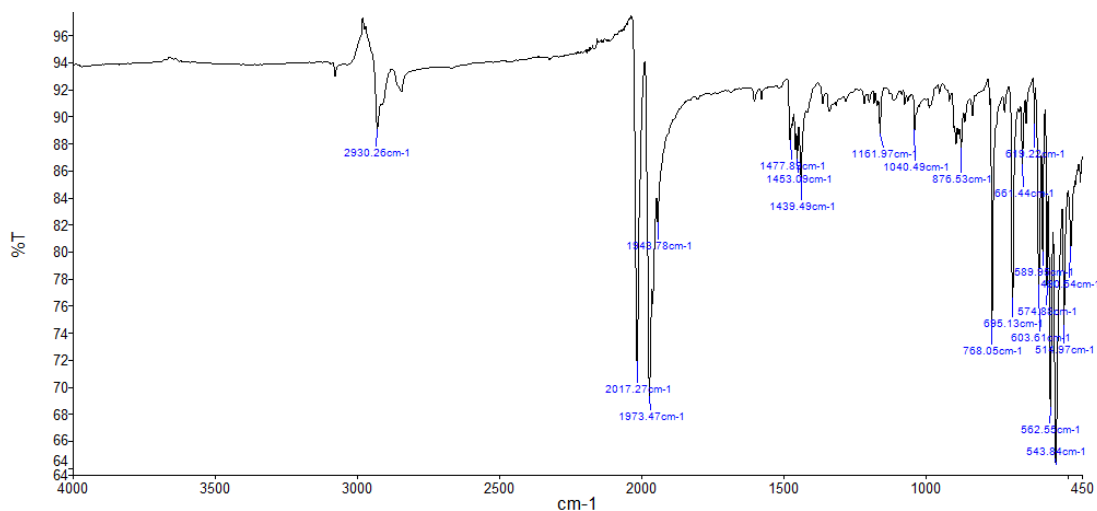

### $\text{Cp}^{\text{W}3}\text{Fe}(\text{CO})_2\text{I}$ (wrh-8OMe-I)

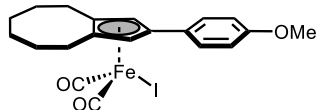

This compound was synthesized on the scale of 3.4 mmol. Purification by column chromatography (gradient elution from 50:1 to 8:1 hexanes/EtOAc) afforded the product as a brown solid (1.0 g, 62% yield).

$^1\text{H NMR}$  (500 MHz,  $\text{CDCl}_3$ )  $\delta$  7.43 (d,  $J = 8.4 \text{ Hz}$ , 2H), 6.91 (d,  $J = 8.4 \text{ Hz}$ , 2H), 5.07 (s, 2H), 3.84 (s, 3H), 2.63 – 2.47 (m, 4H), 1.92 (s, 2H), 1.61 – 1.37 (m, 6H).

$^{13}\text{C NMR}$  (100 MHz,  $\text{CDCl}_3$ )  $\delta$  214.1, 160.5, 127.9, 122.6, 114.5, 103.8, 98.7, 80.2, 55.5, 31.8, 26.1, 25.8.

**HRMS** (ESI) calcd for  $\text{C}_{20}\text{H}_{21}\text{O}_3\text{FeI}$   $[\text{M}]^+$ : 491.9879, found: 491.9883.

**IR** (ATR, neat):  $\tilde{\nu}(\text{CO}) = 2020, 1981 \text{ cm}^{-1}$ .

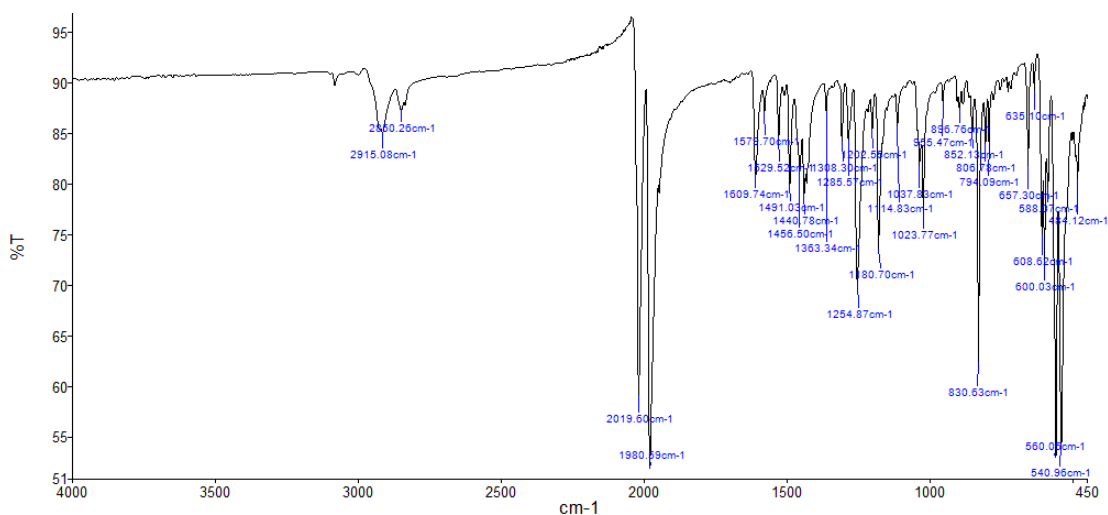

**Cp<sup>W4</sup>Fe(CO)<sub>2</sub>I (wrh-05-7)**

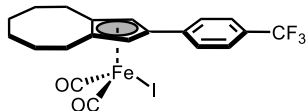

This compound was synthesized on the scale of 2.4 mmol. Purification by column chromatography (60:1 → 50:1 hexanes/EtOAc) afforded the product as a black oil (664 mg, 52% yield).

<sup>1</sup>H NMR (300 MHz, CDCl<sub>3</sub>) δ 7.63 (q, *J* = 8.3 Hz, 4H), 5.24 (s, 2H), 2.69 – 2.40 (m, 4H), 2.05 – 1.83 (m, 2H), 1.66 – 1.35 (m, 6H).

<sup>13</sup>C NMR (100 MHz, CDCl<sub>3</sub>) δ 213.7, 135.1, 130.7 (q, *J* = 32.6 Hz), 126.7, 126.0 (q, *J* = 3.4 Hz), 124.0 (q, *J* = 271 Hz), 103.8, 93.7, 83.3, 31.7, 25.8, 25.7.

<sup>19</sup>F NMR (282 MHz, CDCl<sub>3</sub>) δ -62.80.

HRMS (ESI) calcd for C<sub>20</sub>H<sub>19</sub>F<sub>3</sub>O<sub>2</sub>FeI [M-H]<sup>+</sup>: 528.9569, found: 528.9587.

IR (ATR, neat):  $\tilde{\nu}(\text{CO}) = 2023, 1983 \text{ cm}^{-1}$ .

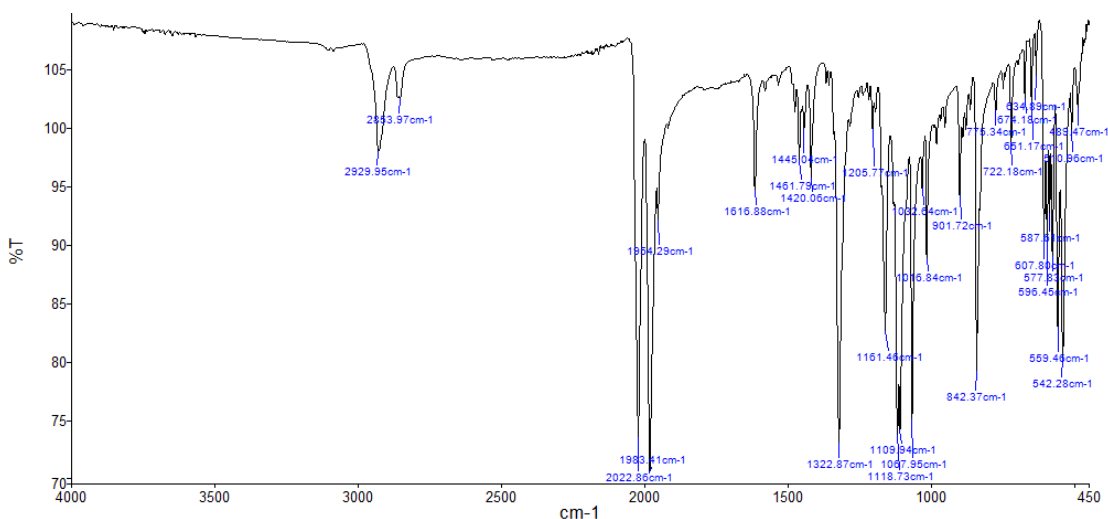

**Cp<sup>W5</sup>Fe(CO)<sub>2</sub>I (wrh-04-180-2)**

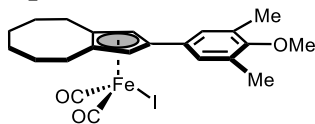

This compound was synthesized on the scale of 3.0 mmol. Purification by column chromatography (80:1 → 50:1 hexanes/EtOAc) afforded the product as a black solid (920 mg, 59% yield).

$^1\text{H NMR}$  (400 MHz,  $\text{CDCl}_3$ )  $\delta$  7.14 (s, 2H), 5.07 (s, 2H), 3.73 (s, 3H), 2.74 – 2.42 (m, 4H), 2.30 (s, 6H), 2.02 – 1.79 (m, 2H), 1.68 – 1.33 (m, 6H).

$^{13}\text{C NMR}$  (100 MHz,  $\text{CDCl}_3$ )  $\delta$  214.2, 158.1, 131.7, 127.1, 125.7, 104.1, 97.8, 80.6, 60.0, 31.9, 26.1, 25.8, 16.4.

**HRMS** (ESI) calcd for  $\text{C}_{22}\text{H}_{25}\text{O}_3\text{FeI}$   $[\text{M}]^+$ : 520.0192, found: 520.0203.

**IR** (ATR, neat):  $\tilde{\nu}(\text{CO}) = 2020, 1983, 1969 \text{ cm}^{-1}$ .

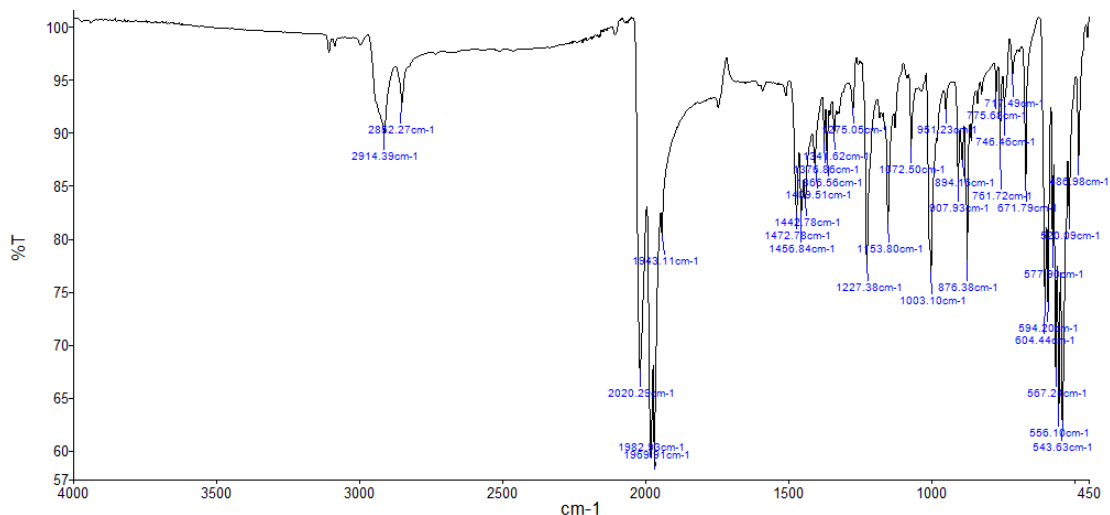

### $\text{Cp}^{\text{W6}}\text{Fe}(\text{CO})_2\text{I}$ (JZ-6-163-1)

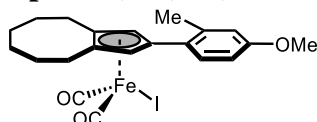

This compound was synthesized on the scale of 3.0 mmol. Purification by column chromatography (30:1 → 20:1 hexanes/EtOAc) afforded the product as a black solid (1.1 g, 71% yield).

$^1\text{H NMR}$  (500 MHz,  $\text{CDCl}_3$ )  $\delta$  7.56 (d,  $J = 8.5 \text{ Hz}$ , 1H), 6.84 – 6.70 (m, 2H), 4.90 (s, 2H), 3.82 (s, 3H), 2.65 – 2.48 (m, 4H), 2.41 (s, 3H), 2.00 – 1.85 (m, 2H), 1.61 – 1.38 (m, 6H).

$^{13}\text{C NMR}$  (100 MHz,  $\text{CDCl}_3$ )  $\delta$  214.2, 159.8, 138.1, 131.6, 122.1, 116.7, 111.8, 103.5, 100.7, 83.8, 55.4, 31.9, 25.94, 25.86, 22.0.

**HRMS** (ESI) calcd for  $\text{C}_{21}\text{H}_{23}\text{O}_3\text{FeI}$   $[\text{M}]^+$ : 506.0036, found: 506.0048.

**IR** (ATR, neat):  $\tilde{\nu}(\text{CO}) = 2015, 1977 \text{ cm}^{-1}$ .

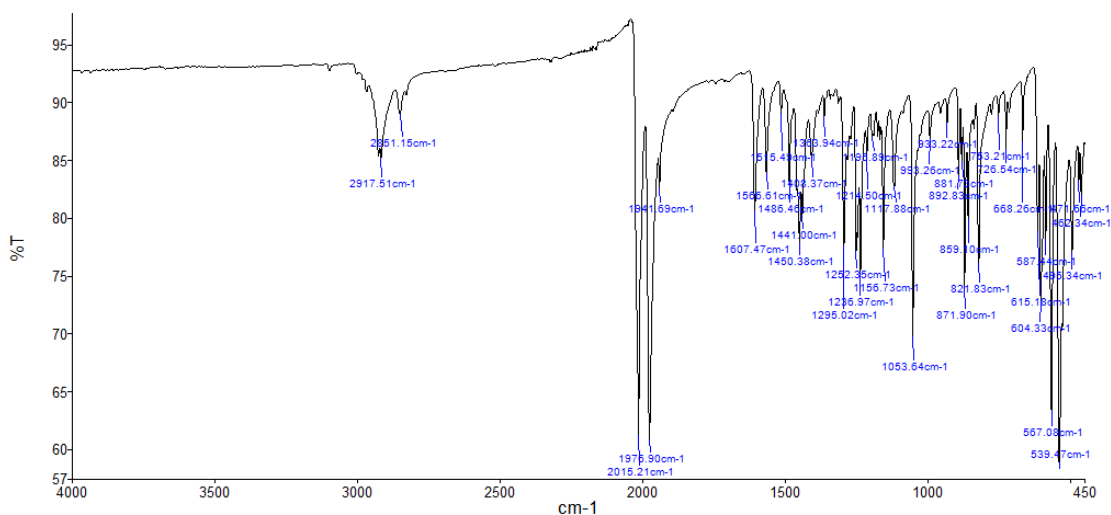

### Characterization data for $\text{Fp}^{\text{X}}(\text{thf})\text{BF}_4$ complexes

Based on literature and our previous experience<sup>6-7</sup>, clean NMR spectra of iron-thf complexes cannot be obtained due to the formation of water complexes and solvated species in chlorine-containing deuterated solvents. Therefore, all the NMR characterization data of the catalysts were obtained in acetonitrile-*d*<sub>3</sub>. The actual species observed in the spectra are the iron-CD<sub>3</sub>CN complexes, along with free THF liberated from the iron-thf complexes. The peaks of complexed CD<sub>3</sub>CN are not observed in the <sup>13</sup>C NMR spectra due to rapid exchange with the solvent. Based on the ratio of the iron complex to free THF molecule, the purity of the iron catalysts is within the range of 86–100%. The impurities are most likely iron-H<sub>2</sub>O complexes generated during work-up.

#### $\text{Fp}^{\text{W1}}(\text{thf})\text{BF}_4$ (wrh-05-6Ph)

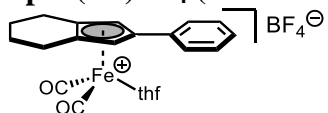

This compound was synthesized on the scale of 0.5 mmol. Purification using method B afforded the product as a sticky dark red solid (207 mg, 89% yield).

<sup>1</sup>H NMR (400 MHz, CD<sub>3</sub>CN)  $\delta$  7.64 – 7.59 (m, 2H), 7.55 – 7.45 (m, 3H), 5.68 (s, 2H), 3.68 – 3.60 (m, 4H), 2.47 – 2.30 (m, 4H), 1.83 – 1.78 (m, 4H), 1.77 – 1.63 (m, 4H).

<sup>13</sup>C NMR (100 MHz, CD<sub>3</sub>CN)  $\delta$  210.5, 131.7, 130.2, 129.5, 128.4, 110.0, 107.0, 75.8, 68.2, 26.1, 22.7, 22.1.

<sup>19</sup>F NMR (376 MHz, CD<sub>3</sub>CN)  $\delta$  –151.6.

HRMS (ESI) calcd for C<sub>17</sub>H<sub>15</sub>O<sub>2</sub>Fe [M–C<sub>4</sub>H<sub>8</sub>O–BF<sub>4</sub>]<sup>+</sup>: 307.0416, found: 307.0410.

IR (ATR, neat):  $\tilde{\nu}(\text{CO}) = 2043, 1992 \text{ cm}^{-1}$ .



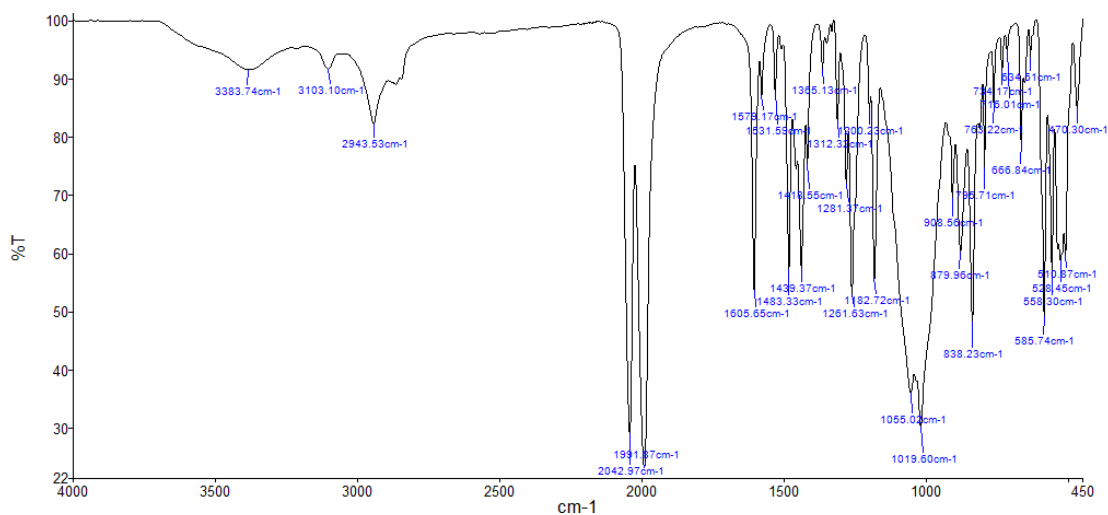

**Fp<sup>W2</sup>(thf)BF<sub>4</sub> (wrh-05-Ph)**

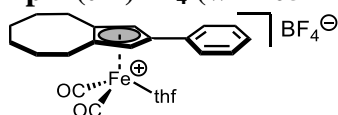

This compound was synthesized on the scale of 0.5 mmol. Purification using method A afforded the product as a red solid (173 mg, 70% yield).

<sup>1</sup>H NMR (400 MHz, CD<sub>3</sub>CN) δ 7.67 – 7.59 (m, 2H), 7.56 – 7.44 (m, 3H), 5.87 (s, 2H), 3.69 – 3.59 (m, 4H), 2.49 (dt, *J* = 13.8, 3.8 Hz, 2H), 2.32 – 2.20 (m, 2H), 1.97 – 1.85 (m, 2H), 1.84 – 1.73 (m, 4H), 1.64 – 1.32 (m, 6H).

<sup>13</sup>C NMR (100 MHz, CD<sub>3</sub>CN) δ 210.3, 131.6, 130.3, 129.6, 128.5, 109.3, 106.9, 80.5, 68.2, 31.2, 26.2, 26.1, 25.4.

<sup>19</sup>F NMR (376 MHz, CD<sub>3</sub>CN) δ –151.7.

HRMS (ESI) calcd for C<sub>21</sub>H<sub>22</sub>O<sub>2</sub>NFe [M–C<sub>4</sub>H<sub>8</sub>O–BF<sub>4</sub>+C<sub>2</sub>H<sub>3</sub>N]<sup>+</sup>: 376.0994, found: 376.0996.

IR (ATR, neat):  $\tilde{\nu}(\text{CO}) = 2053, 2008 \text{ cm}^{-1}$ .

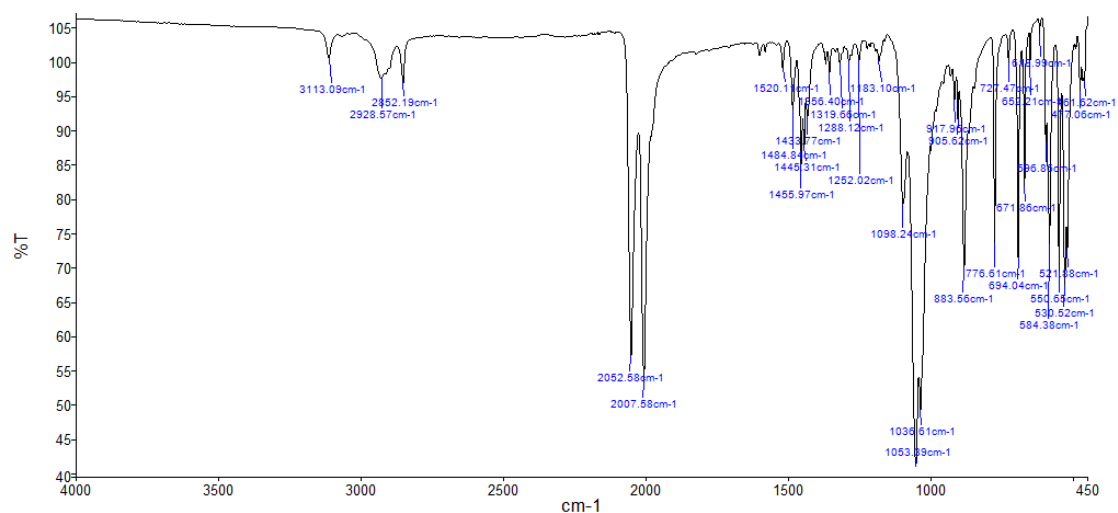

**Fp<sup>W3</sup>(thf)BF<sub>4</sub> (wrh-05-OMe)**

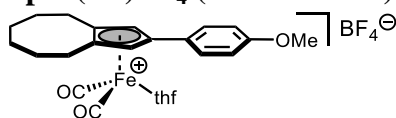

This compound was synthesized on the scale of 1.0 mmol. Purification using method B afforded the product as a red solid (498 mg, 95% yield).

$^1\text{H NMR}$  (400 MHz,  $\text{CD}_3\text{CN}$ )  $\delta$  7.62 – 7.55 (m, 2H), 7.05 – 6.99 (m, 2H), 5.78 (s, 2H), 3.84 (s, 3H), 3.68 – 3.60 (m, 4H), 2.46 (dt,  $J = 13.8, 3.9$  Hz, 2H), 2.27 – 2.20 (m, 2H), 1.92 – 1.84 (m, 2H), 1.84 – 1.76 (m, 4H), 1.61 – 1.32 (m, 6H).

$^{13}\text{C NMR}$  (100 MHz,  $\text{CD}_3\text{CN}$ )  $\delta$  210.5, 162.8, 130.3, 121.1, 115.7, 113.0, 106.2, 78.9, 68.2, 56.2, 31.2, 26.1, 26.0, 25.4.

$^{19}\text{F NMR}$  (376 MHz,  $\text{CD}_3\text{CN}$ )  $\delta$  -151.6.

**HRMS** (ESI) calcd for  $\text{C}_{22}\text{H}_{24}\text{O}_3\text{NFe}$  [ $\text{M}-\text{C}_4\text{H}_8\text{O}-\text{BF}_4+\text{C}_2\text{H}_3\text{N}$ ] $^+$ : 406.1100, found: 406.1104.

**IR** (ATR, neat):  $\tilde{\nu}(\text{CO}) = 2045, 1995 \text{ cm}^{-1}$ .

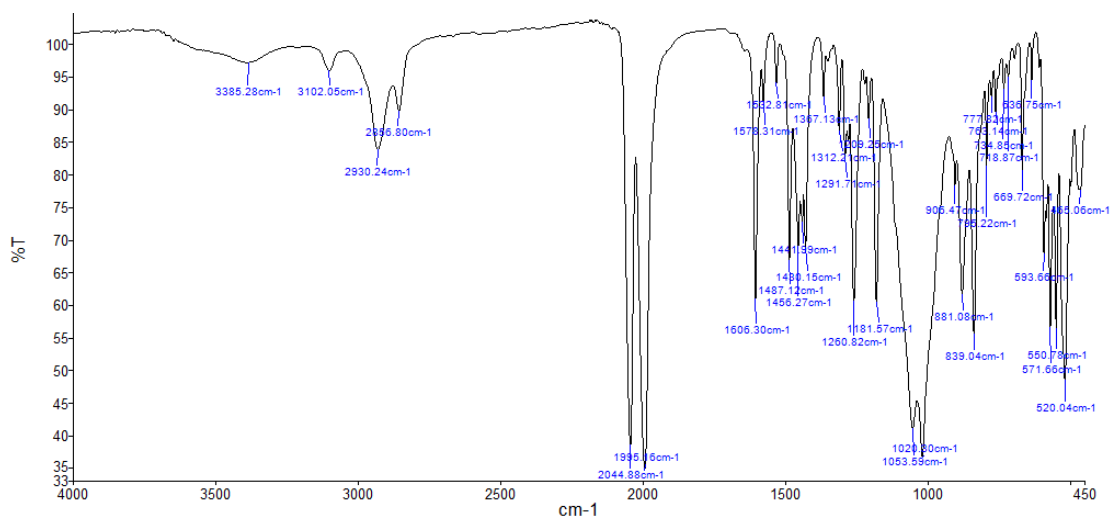

### $\text{Fp}^{\text{W4}}\text{Fe}(\text{thf})\text{BF}_4$ (wrh-05-8CF3)

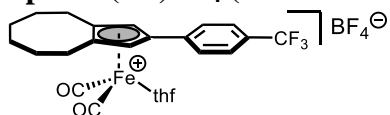

This compound was synthesized on the scale of 0.5 mmol. Purification using method A afforded the product as a red solid (211 mg, 75% yield).

$^1\text{H NMR}$  (400 MHz,  $\text{CD}_3\text{CN}$ )  $\delta$  7.79 (s, 4H), 5.94 (s, 2H), 3.68 – 3.59 (m, 4H), 2.50 (dt,  $J = 13.9, 3.9$  Hz, 2H), 2.36 – 2.25 (m, 2H), 1.97 – 1.86 (m, 2H), 1.84 – 1.75 (m, 4H), 1.63 – 1.33 (m, 6H).

$^{13}\text{C NMR}$  (100 MHz,  $\text{CDCl}_3$ )  $\delta$  209.9, 134.4 (q,  $J = 1.2$  Hz), 132.0 (q,  $J = 32.5$  Hz), 128.9, 127.1 (q,  $J = 3.9$  Hz), 125.0 (q,  $J = 270$  Hz), 107.4, 104.1, 82.2, 68.2, 31.2, 26.2, 26.0, 25.3.

$^{19}\text{F NMR}$  (376 MHz,  $\text{CD}_3\text{CN}$ )  $\delta$  -63.52, -151.7.

**HRMS** (ESI) calcd for  $\text{C}_{22}\text{H}_{21}\text{O}_2\text{NF}_3\text{Fe}$  [ $\text{M}-\text{C}_4\text{H}_8\text{O}-\text{BF}_4+\text{C}_2\text{H}_3\text{N}$ ] $^+$ : 444.0868, found: 444.0870.

**IR** (ATR, neat):  $\tilde{\nu}(\text{CO}) = 2053, 2007 \text{ cm}^{-1}$ .

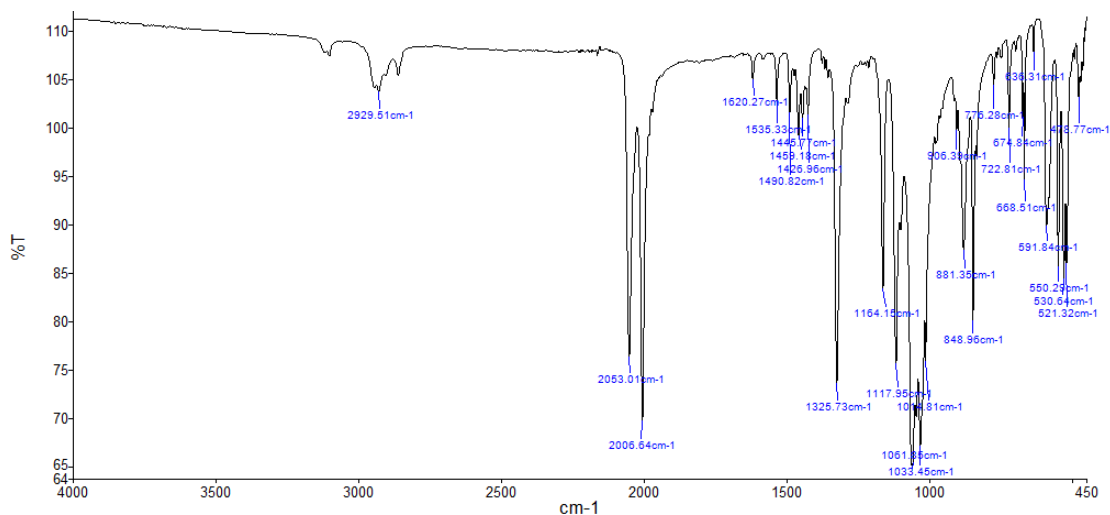

**Fp<sup>W5</sup>(thf)BF<sub>4</sub> (wrh-05-2MeOMe)**

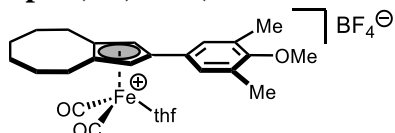

This compound was synthesized on the scale of 1.0 mmol. Purification using method A afforded the product as a red solid (464 mg, 84% yield).

**<sup>1</sup>H NMR** (400 MHz, CD<sub>3</sub>CN) δ 7.34 (s, 2H), 5.79 (s, 2H), 3.71 (d, *J* = 4.8 Hz, 3H), 3.68 – 3.60 (m, 4H), 2.46 (dt, *J* = 13.8, 3.8 Hz, 2H), 2.30 (s, 6H), 2.27 – 2.18 (m, 2H), 1.93 – 1.84 (m, 2H), 1.84 – 1.75 (m, 4H), 1.61 – 1.30 (m, 6H).

**<sup>13</sup>C NMR** (100 MHz, CD<sub>3</sub>CN) δ 210.5, 160.3, 133.1, 129.3, 124.5, 111.6, 106.4, 79.8, 68.2, 60.2, 31.2, 26.2, 26.0, 25.4, 16.2.

**<sup>19</sup>F NMR** (376 MHz, CD<sub>3</sub>CN) δ –151.6.

**HRMS** (ESI) calcd for C<sub>24</sub>H<sub>28</sub>O<sub>3</sub>NFe [M–C<sub>4</sub>H<sub>8</sub>O–BF<sub>4</sub>+C<sub>2</sub>H<sub>3</sub>N]<sup>+</sup>: 434.1413, found: 434.1419.

**IR** (ATR, neat):  $\tilde{\nu}(\text{CO}) = 2045, 1994 \text{ cm}^{-1}$ .

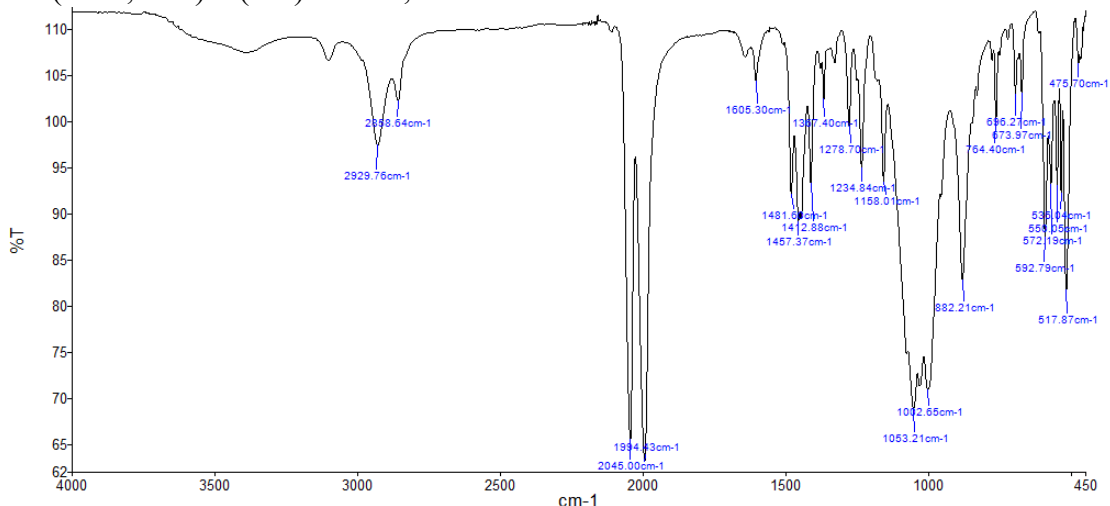

**Fp<sup>W6</sup>Fe(thf)BF<sub>4</sub> (wrh-05-8MeOMe)**

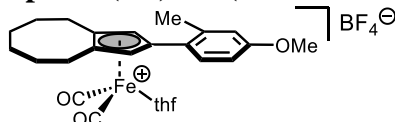

This compound was synthesized on the scale of 1.0 mmol. Purification using method B afforded the product as a dark red solid (484 mg, 90% yield).

**<sup>1</sup>H NMR** (400 MHz, CD<sub>3</sub>CN) δ 7.52 – 7.46 (m, 1H), 6.89 – 6.83 (m, 2H), 5.64 (s, 2H), 3.81 (s, 3H), 3.68 – 3.60 (m, 4H), 2.52 – 2.44 (m, 5H), 2.32 – 2.21 (m, 2H), 1.93 – 1.86 (m, 2H), 1.84 – 1.76 (m, 4H), 1.63 – 1.45 (m, 4H), 1.45 – 1.33 (m, 2H).

**<sup>13</sup>C NMR** (100 MHz, CD<sub>3</sub>CN) δ 210.6, 161.9, 140.6, 134.8, 132.8, 120.4, 112.9, 112.8, 106.4, 82.2, 68.2, 56.0, 31.1, 26.2, 26.0, 25.2, 22.3.

**<sup>19</sup>F NMR** (376 MHz, CD<sub>3</sub>CN) δ –151.6.

**HRMS** (ESI) calcd for C<sub>23</sub>H<sub>26</sub>O<sub>3</sub>NFe [M–C<sub>4</sub>H<sub>8</sub>O–BF<sub>4</sub>+C<sub>2</sub>H<sub>3</sub>N]<sup>+</sup>: 420.1257, found: 420.1259.

**IR** (ATR, neat):  $\tilde{\nu}(\text{CO}) = 2046, 1995 \text{ cm}^{-1}$ .

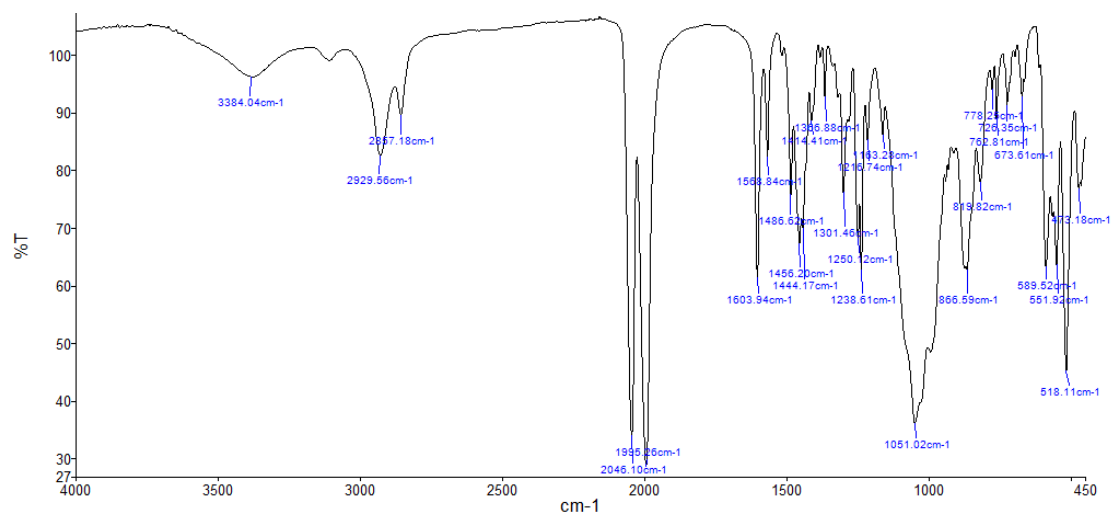

## Synthetic applications of the products

### Synthesis of 6-(benzo[*b*]thiophen-2-yl)-5,6-dihydro-2*H*-pyran-2-one (**37**, PBS-54B)

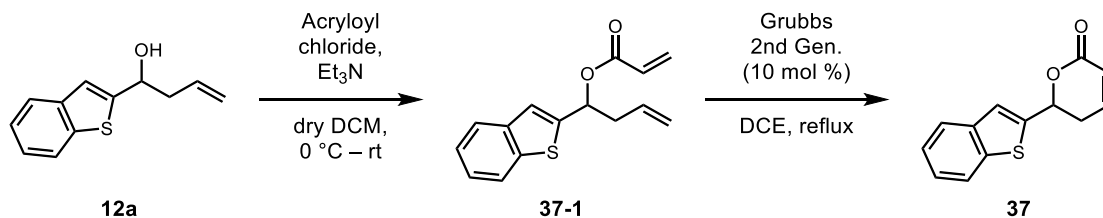

A flame-dried 10 mL round bottom flask was charged with compound **12a** (204 mg, 1.0 mmol, 1.0 equiv) and  $\text{CH}_2\text{Cl}_2$  (2 mL), and was cooled to  $0\text{ }^\circ\text{C}$ . To the resulting mixture were added triethylamine (0.36 mL, 2.5 mmol, 2.5 equiv) and acryloyl chloride (0.12 mL, 1.5 mmol, 1.5 equiv) in succession dropwise. The reaction mixture was allowed to warm to room temperature overnight, filtered through magnesium sulfate and purified by column chromatography (40:1 hexanes/EtOAc) to afford the acrylate product **37-1** as a colorless oil (165 mg, 64% yield).

$^1\text{H NMR}$  (400 MHz,  $\text{CDCl}_3$ )  $\delta$  7.84 – 7.77 (m, 1H), 7.76 – 7.70 (m, 1H), 7.37 – 7.27 (m, 3H), 6.46 (dd,  $J = 17.3, 1.3$  Hz, 1H), 6.24 (t,  $J = 6.9$  Hz, 1H), 6.15 (dd,  $J = 17.3, 10.4$  Hz, 1H), 5.87 (dd,  $J = 10.4, 1.3$  Hz, 1H), 5.78 (ddt,  $J = 17.1, 10.2, 6.9$  Hz, 1H), 5.21 – 5.06 (m, 2H), 2.89 – 2.72 (m, 2H). (**PBS-54A**)

$^1\text{H NMR}$  data were in agreement with the literature.<sup>8</sup>

A degassed solution of compound **37-1** (165 mg, 0.6 mmol, 1.0 equiv) in anhydrous  $\text{DCE}$  (6.4 mL) was added to a flamed-dried two-neck 50 mL round bottom flask fitted with a reflux condenser. The mixture was heated to the point of reflux, and a degassed solution of Grubbs Catalyst 2<sup>nd</sup> Generation (54 mg, 10 mol %) in 6.4 mL of anhydrous  $\text{DCE}$  was added dropwise. The reaction mixture was stirred at reflux for 10 h, and was allowed to cool to room temperature. The mixture was concentrated *in vacuo* and purified by column chromatography (3:1 → 1:1 hexanes/EtOAc) to afford product **37** as a light brown solid (128 mg, 87% yield).

**m.p.** = 129 – 130  $^\circ\text{C}$

$^1\text{H NMR}$  (500 MHz,  $\text{CDCl}_3$ )  $\delta$  7.86 – 7.80 (m, 1H), 7.76 (m, 1H), 7.41 – 7.31 (m, 3H), 6.97 (ddd,  $J = 9.6, 5.3, 3.1$  Hz, 1H), 6.15 (d,  $J = 9.9$  Hz, 1H), 5.79 (dd,  $J = 10.0, 4.9$  Hz, 1H), 2.92 – 2.76 (m, 2H).

$^{13}\text{C NMR}$  (125 MHz,  $\text{CDCl}_3$ )  $\delta$  163.2, 144.3, 141.8, 139.7, 139.4, 125.5, 124.8, 124.0, 122.6, 122.4, 122.0, 75.6, 31.4.

**HRMS** (ESI) calcd for  $\text{C}_{13}\text{H}_9\text{O}_2\text{S}$   $[\text{M}-\text{H}]^+$ : 229.0318, found: 229.0327.

### Synthesis of ethyl 2-(4-hydroxy-6-phenyltetrahydro-2*H*-pyran-2-yl)acetate (**38**, CZZ-54)

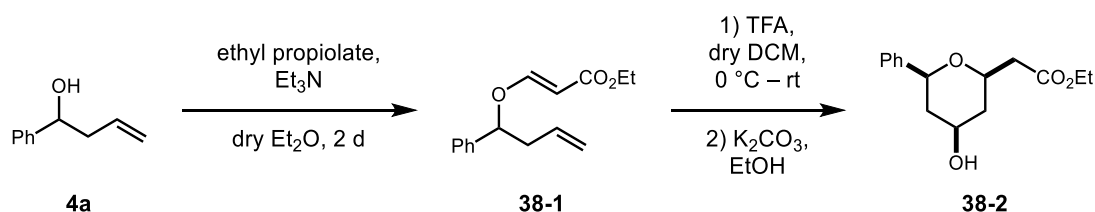

This compound was synthesized according to a modified literature procedure.<sup>9</sup>

A flame-dried 25 mL round bottom flask was charged with ethyl propiolate (114 mg, 1.1 mmol, 1.1 equiv), dry diethyl ether (4 mL) and triethylamine (0.24 mL, 1.7 mmol, 1.7 equiv) under nitrogen. The resulting mixture was stirred at room temperature for 15 min and compound **4a** (148 mg, 1.0 mmol, 1.0 equiv) was added dropwise. After stirring for 2 days, the mixture was concentrated *in vacuo* and purified by column chromatography (30:1 hexanes/EtOAc) to afford the product **38-1** as a colorless oil (234 mg, 95% yield).

<sup>1</sup>H NMR (400 MHz, CDCl<sub>3</sub>) δ 7.51 (d, *J* = 12.5 Hz, 1H), 7.41 – 7.23 (m, 5H), 5.73 (ddt, *J* = 17.3, 10.4, 6.9 Hz, 1H), 5.22 (d, *J* = 12.5 Hz, 1H), 5.14 – 5.04 (m, 2H), 4.89 (dd, *J* = 7.6, 5.7 Hz, 1H), 4.17 – 4.04 (m, 2H), 2.75 – 2.65 (m, 1H), 2.59 – 2.50 (m, 1H), 1.22 (t, *J* = 7.1 Hz, 3H). (**czz-40**)

<sup>1</sup>H NMR data were in agreement with the literature.<sup>9</sup>

A flame-dried 50 mL round bottom flask was charged with compound **38-1** (183 mg, 0.7 mmol, 1.0 equiv) and dry CH<sub>2</sub>Cl<sub>2</sub> (8.3 mL) under nitrogen. The reaction mixture was cooled to 0 °C, and trifluoroacetic acid (0.57 mL, 7.4 mmol, 10 equiv) was added dropwise to the stirred solution. After 15 min, the reaction mixture was allowed to warm to room temperature and stirred for another 30 min. Then the reaction mixture was carefully poured into a saturated aqueous solution of Na<sub>2</sub>CO<sub>3</sub> (50 mL) and crushed ice, and was added 10 mL of CH<sub>2</sub>Cl<sub>2</sub>. The resulting mixture was stirred vigorously for 10 min, and was extracted with CH<sub>2</sub>Cl<sub>2</sub> (3 × 80 mL). The combined organic layers were dried over magnesium sulfate, concentrated *in vacuo* and used directly for the next step.

A 50 mL round bottom flask containing extracts from the last step was charged with potassium carbonate (51 mg, 0.4 mmol, 0.5 equiv) and ethanol (8.3 mL). The resulting mixture was stirred at room temperature for 19 h. Then the mixture was diluted with 5 mL of water and 5 mL of brine, and was subsequently extracted with EtOAc (3 × 20 mL). The combined organic layers were dried over magnesium sulfate, concentrated *in vacuo* and purified by column chromatography (2:1 hexanes/EtOAc) to afford the product **38** as a colorless oil (102 mg, 52% yield).

<sup>1</sup>H NMR (400 MHz, C<sub>6</sub>D<sub>6</sub>) δ 7.29 (d, *J* = 7.2 Hz, 2H), 7.20 – 7.13 (m, 2H), 7.11 – 7.05 (m, 1H), 4.11 (dd, *J* = 11.5, 1.9 Hz, 1H), 3.97 – 3.81 (m, 3H), 3.50 – 3.39 (m, 1H), 2.62 (dd, *J* = 15.3, 7.5 Hz, 1H), 2.27 (dd, *J* = 15.3, 5.5 Hz, 1H), 1.83 (ddt, *J* = 12.4, 4.3, 2.0 Hz, 1H), 1.77 (ddt, *J* = 6.5, 4.1, 1.9 Hz, 1H), 1.27 (dd, *J* = 23.6, 11.4 Hz, 1H), 1.14 – 1.03 (m, 1H), 0.95 – 0.89 (m, 4H).

<sup>13</sup>C NMR (100 MHz, C<sub>6</sub>D<sub>6</sub>) δ 170.9, 143.1, 128.7, 127.7, 126.4, 77.9, 73.0, 68.2, 60.6, 43.7, 41.7, 41.0, 14.5.

HRMS (ESI) calcd for C<sub>15</sub>H<sub>21</sub>O<sub>4</sub> [M+H]<sup>+</sup>: 265.1434, found: 265.1435.

<sup>1</sup>H NMR data were in agreement with the literature.<sup>9</sup>

The relative configuration of **38** was assigned via the 2D NOESY correlation illustrated below:

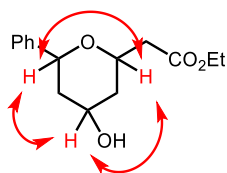

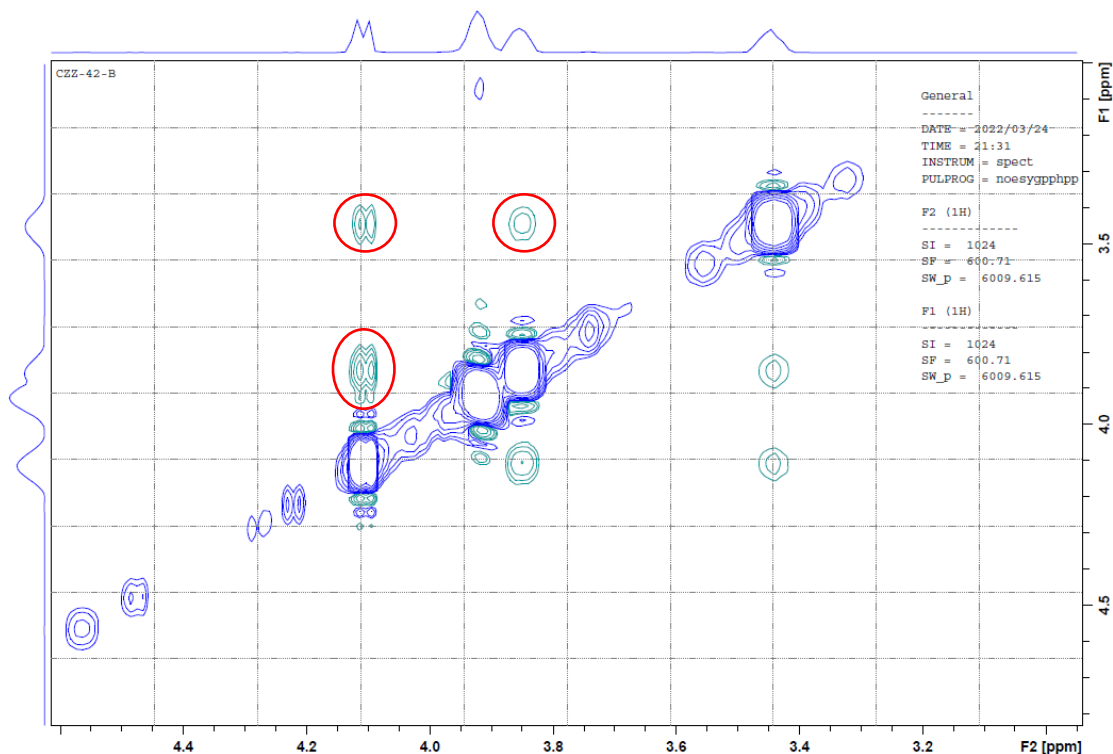

The correlations between each of the three protons indicate a syn relationship among the three substituents on the THP ring.

### Synthesis of 1-(5-(bromomethyl)-3-(6-(trifluoromethyl)pyridin-3-yl)-4,5-dihydro-1H-pyrazol-1-yl)ethan-1-one (**39**, czz-53')

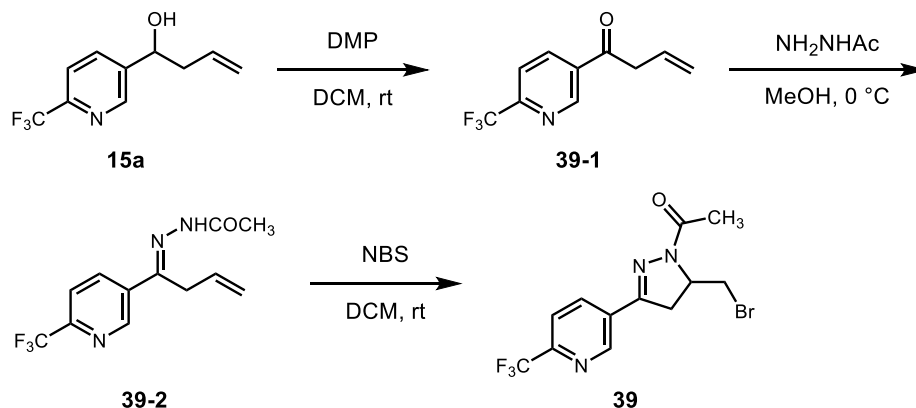

A flame-dried 25 mL round bottom flask was charged with Dess-Martin periodinane (723 mg, 1.7 mmol, 1.3 equiv), compound **15a** (285 mg, 1.3 mmol, 1.0 equiv) and anhydrous  $\text{CH}_2\text{Cl}_2$  (8 mL). The reaction was monitored by thin layer chromatography until completion. Then the reaction mixture was quenched with water (2 mL), stirred vigorously at room temperature for 30 min and extracted with  $\text{CH}_2\text{Cl}_2$  ( $5 \times 10$  mL). The combined organic layers were dried over magnesium sulfate, concentrated *in vacuo* and purified by column chromatography (10:1 hexanes/EtOAc) to afford the product **39-1** as a pale yellow solid (200 mg, 71% yield). (PBS-59A)

**m.p.** = 44 – 46 °C

$^1\text{H}$  NMR (500 MHz,  $\text{CDCl}_3$ )  $\delta$  9.25 (d,  $J$  = 1.5 Hz, 1H), 8.41 (dd,  $J$  = 8.2, 1.7 Hz, 1H), 7.81 (d,  $J$  = 8.1 Hz, 1H), 6.05 (ddt,  $J$  = 17.0, 10.3, 6.7 Hz, 1H), 5.34 – 5.23 (m, 2H), 3.80 (dt,  $J$  = 6.7, 1.3 Hz, 2H).

$^{13}\text{C}$  NMR (125 MHz,  $\text{CDCl}_3$ )  $\delta$  195.7, 151.4 (q,  $J = 35.1$  Hz), 150.0, 137.4, 133.9, 129.6, 121.2 (q,  $J = 273$  Hz), 120.7 (q,  $J = 2.7$  Hz), 120.1, 44.1.

$^{19}\text{F}$  NMR (470 MHz,  $\text{CDCl}_3$ )  $\delta$  -68.29.

HRMS (ESI) calcd for  $\text{C}_{10}\text{H}_9\text{ONF}_3$   $[\text{M}+\text{H}]^+$ : 216.0631, found: 216.0624.

A flame-dried 10 mL round bottom flask was charged with compound **39-1** (200 mg, 0.9 mmol, 1.0 equiv) and methanol (1 mL). The resulting mixture was cooled to 0 °C and was added acetylhydrazide (103 mg, 1.4 mmol, 1.5 equiv). The mixture was stirred at 0 °C and monitored by thin layer chromatography until completion. The solvent was removed under reduced pressure, and the residue was diluted with water (5 mL) and extracted with EtOAc ( $5 \times 10$  mL). The combined organic layers were dried over magnesium sulfate, concentrated *in vacuo* and purified by column chromatography (1.5:1 hexanes/EtOAc) to yield the product **39-2** as a white solid (127 mg, 52% yield). (czz-56)

m.p. = 144 – 145 °C

$^1\text{H}$  NMR (500 MHz,  $\text{CDCl}_3$ )  $\delta$  9.34 (s, 1H), 9.08 (s, 1H), 8.17 (d,  $J = 7.7$  Hz, 1H), 7.70 (d,  $J = 8.1$  Hz, 1H), 5.97 – 5.81 (m, 1H), 5.24 (d,  $J = 10.1$  Hz, 1H), 5.13 (d,  $J = 17.3$  Hz, 1H), 3.60 – 3.42 (m, 2H), 2.39 (s, 3H).

$^{13}\text{C}$  NMR (125 MHz,  $\text{CDCl}_3$ )  $\delta$  174.1, 148.2 (q,  $J = 34.7$  Hz), 148.0, 143.8, 135.8, 134.7, 129.1, 121.6 (q,  $J = 272$  Hz), 120.30 (q,  $J = 2.6$  Hz), 118.9, 30.9, 20.7.

$^{19}\text{F}$  NMR (470 MHz,  $\text{CDCl}_3$ )  $\delta$  -67.98.

HRMS (ESI) calcd for  $\text{C}_{12}\text{H}_{13}\text{ON}_3\text{F}_3$   $[\text{M}+\text{H}]^+$ : 272.1005, found: 272.0996.

This step was performed according to literature procedure.<sup>10</sup>

A flame-dried 25 mL round bottom flask was charged with compound **39-2** (132 mg, 0.5 mmol, 1.0 equiv), NBS (105 mg, 0.6 mmol, 1.2 equiv) and dry  $\text{CH}_2\text{Cl}_2$  (5 mL). The reaction mixture was stirred at room temperature and monitored by thin layer chromatography until completion. The mixture was concentrated *in vacuo* and purified by column chromatography (2:1 hexanes/EtOAc) to afford the dihydropyrazole product **39** as a colorless oil (102 mg, 60% yield). (czz-53)

$^1\text{H}$  NMR (400 MHz,  $\text{CDCl}_3$ )  $\delta$  8.99 (s, 1H), 8.21 (dd,  $J = 8.2, 1.4$  Hz, 1H), 7.73 (d,  $J = 8.2$  Hz, 1H), 4.96 (dtd,  $J = 7.9, 5.7, 2.6$  Hz, 1H), 3.86 (dd,  $J = 10.4, 6.1$  Hz, 1H), 3.70 (dd,  $J = 10.5, 2.6$  Hz, 1H), 3.49 (dd,  $J = 17.9, 11.5$  Hz, 1H), 3.24 (dd,  $J = 17.9, 5.2$  Hz, 1H), 2.40 (s, 3H).

$^{13}\text{C}$  NMR (100 MHz,  $\text{CDCl}_3$ )  $\delta$  169.9, 150.0, 149.0 (q,  $J = 35.1$  Hz), 147.9, 134.9, 130.0, 121.4 (q,  $J = 273$  Hz), 120.5 (q,  $J = 2.7$  Hz), 57.4, 37.6, 34.1, 22.0.

$^{19}\text{F}$  NMR (470 MHz,  $\text{CDCl}_3$ )  $\delta$  -68.03.

HRMS (ESI) calcd for  $\text{C}_{12}\text{H}_{12}\text{ON}_3\text{BrF}_3$   $[\text{M}+\text{H}]^+$ : 350.0110, found: 350.0099.

### Synthesis of *N,N*-dibenzyl-4-(4-bromophenyl)-4-((*tert*-butyldimethylsilyl)oxy)butane-1-amine (**40**, PBS-63)

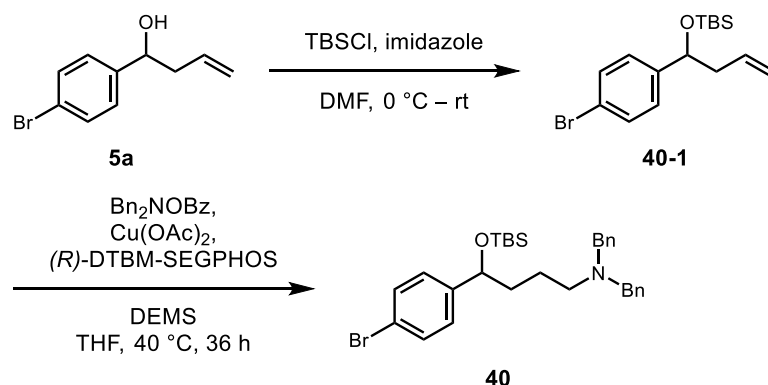



A 10 mL round bottom flask was charged with compound **5a** (227 mg, 1.0 mmol, 1.0 equiv) and DMF (1 mL), and was cooled to 0 °C. To the mixture were added imidazole (204 mg, 3.0 mmol, 3 equiv) and the solution of TBSCl (301 mg, 2.0 mmol, 2.0 equiv) in DMF (0.5 mL) dropwise (1 mL/min). The mixture was stirred at 0 °C for 10 min and was allowed to warm to room temperature. After stirring for 1 h, the mixture was quenched with saturated NH<sub>4</sub>Cl solution and extracted with EtOAc (3 × 10 mL). The combined organic layers were dried over magnesium sulfate, concentrated *in vacuo* and purified by column chromatography (100% hexanes) to afford the product **40-1** as a colorless liquid (326 mg, 95% yield). (PBS-62B)

<sup>1</sup>H NMR (500 MHz, CDCl<sub>3</sub>) δ 7.43 (d, *J* = 8.4 Hz, 2H), 7.18 (d, *J* = 8.3 Hz, 2H), 5.74 (ddt, *J* = 17.4, 10.4, 7.1 Hz, 1H), 5.04 – 4.95 (m, 2H), 4.65 (dd, *J* = 6.7, 5.6 Hz, 1H), 2.46 – 2.31 (m, 2H), 0.88 (s, 9H), 0.03 (s, 3H), –0.12 (s, 3H).

<sup>13</sup>C NMR (125 MHz, CDCl<sub>3</sub>) δ 144.3, 134.8, 131.3, 127.8, 120.8, 117.4, 74.6, 45.5, 26.0, 18.4, –4.5, –4.7.

HRMS (ESI) calcd for C<sub>10</sub>H<sub>10</sub>Br [M–OTBS]<sup>+</sup>: 208.9960, found: 208.9959.

This step was performed according to literature procedure.<sup>11</sup>

In an argon-filled glovebox, a flame-dried screw-cap reaction tube was charged with Cu(OAc)<sub>2</sub> (3.6 mg, 0.02 mmol, 2 mol %), (*R*)-DTBM-SEGPHOS (26 mg, 0.022 mmol, 2.2 mol %) and dry THF (1 mL). The mixture was stirred at room temperature for 15 min. Diethoxymethylsilane (DEMS) (0.32 mL, 2.0 mmol, 2.0 equiv) was added to the mixture. After stirring for 10 min, the solution was added to another screw-cap reaction tube charged with compound **40-1** (341 mg, 1.0 mmol, 1.0 equiv) and (dibenzylamino) benzoate (381 mg, 1.2 mmol, 1.2 equiv). The resulting mixture was stirred at 40 °C for 24 h. After cooling to room temperature, the reaction mixture was quenched with saturated Na<sub>2</sub>CO<sub>3</sub> solution (2 mL) and extracted with EtOAc (3 × 10 mL). The combined organic layers were dried over magnesium sulfate, concentrated *in vacuo* and purified via column chromatography (150:1 hexanes/EtOAc) to afford the product **40** as a colorless oil (348 mg, 65% yield).

<sup>1</sup>H NMR (500 MHz, CDCl<sub>3</sub>) δ 7.40 (d, *J* = 8.4 Hz, 2H), 7.35 – 7.27 (m, 8H), 7.25 – 7.20 (m, 2H), 7.09 (d, *J* = 8.3 Hz, 2H), 4.50 (dd, *J* = 6.4, 5.4 Hz, 1H), 3.54 (d, *J* = 13.6 Hz, 2H), 3.48 (d, *J* = 13.6 Hz, 2H), 2.43 – 2.33 (m, 2H), 1.68 – 1.41 (m, 4H), 0.86 (s, 9H), –0.03 (s, 3H), –0.18 (s, 3H).

<sup>13</sup>C NMR (125 MHz, CDCl<sub>3</sub>) δ 144.9, 140.1, 131.2, 128.9, 128.3, 127.8, 126.9, 120.6, 74.2, 58.6, 53.4, 38.3, 26.1, 22.9, 18.3, –4.5, –4.8.

HRMS (ESI) calcd for C<sub>30</sub>H<sub>41</sub>ONBrSi [M+H]<sup>+</sup>: 538.2135, found: 538.2119.

## Kinetic isotope effect experiments

### 1. Independent KIE results

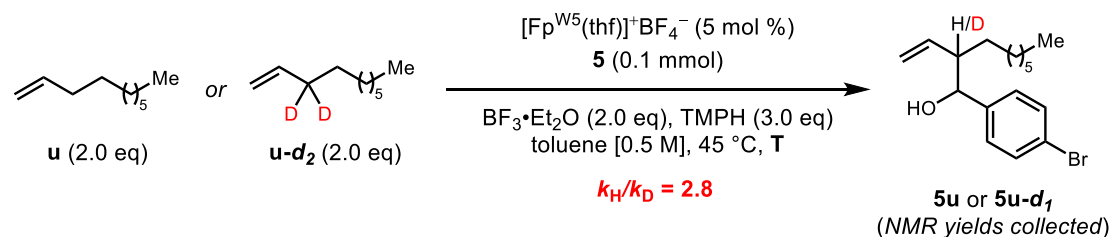

To a flame-dried reaction tube charged with a magnetic stir bar,  $\text{Fp}^{\text{W5}}(\text{thf})\text{BF}_4$  (2.8 mg, 5 mol %), aldehyde **5** (18 mg, 0.1 mmol, 1.0 equiv), alkene **u** (38  $\mu\text{L}$ , 0.2 mmol, 2.0 equiv) or **u-d<sub>2</sub>** (28 mg, 0.2 mmol, 2.0 equiv), dry toluene (0.2 mL),  $\text{BF}_3 \cdot \text{Et}_2\text{O}$  (25  $\mu\text{L}$ , 0.2 mmol, 2.0 equiv), TMPH (51  $\mu\text{L}$ , 0.3 mmol, 3.0 equiv) were added in succession in an argon-filled glovebox. The tube was sealed and placed in an oil bath preheated at 45 °C with vigorous stirring. Reactions were stopped at corresponding times within 0 min to 3 h. Yields were determined by  $^1\text{H}$  NMR using 2,4-dinitrotoluene as the internal standard (Table S1). Each reaction was conducted twice, and average yields of two runs were used for the calculation of the KIE value (Chart S1).

**Table S1.** Original data for independent kinetic experiments (yields).

|                                                               | 10 min |       | 30 min |       | 1 h   |       | 2 h   |       | 3 h   |       |
|---------------------------------------------------------------|--------|-------|--------|-------|-------|-------|-------|-------|-------|-------|
|                                                               | Run#1  | Run#2 | Run#1  | Run#2 | Run#1 | Run#2 | Run#1 | Run#2 | Run#1 | Run#2 |
| 1-decene<br>( <b>u</b> )                                      | 0      | 0.2%  | 2.6%   | 1.5%  | 3.7%  | 3.3%  | 9.1%  | 9.5%  | 16%   | 15%   |
| 1-decene-<br><i>d</i> <sub>2</sub> ( <b>u-d<sub>2</sub></b> ) | 0      | 0     | 0.8%   | 0.4%  | 1.1%  | 1.4%  | 2.9%  | 3.3%  | 5.6%  | 5.2%  |

**Chart S1.** Initial rates with **u** and **u-d<sub>2</sub>**.

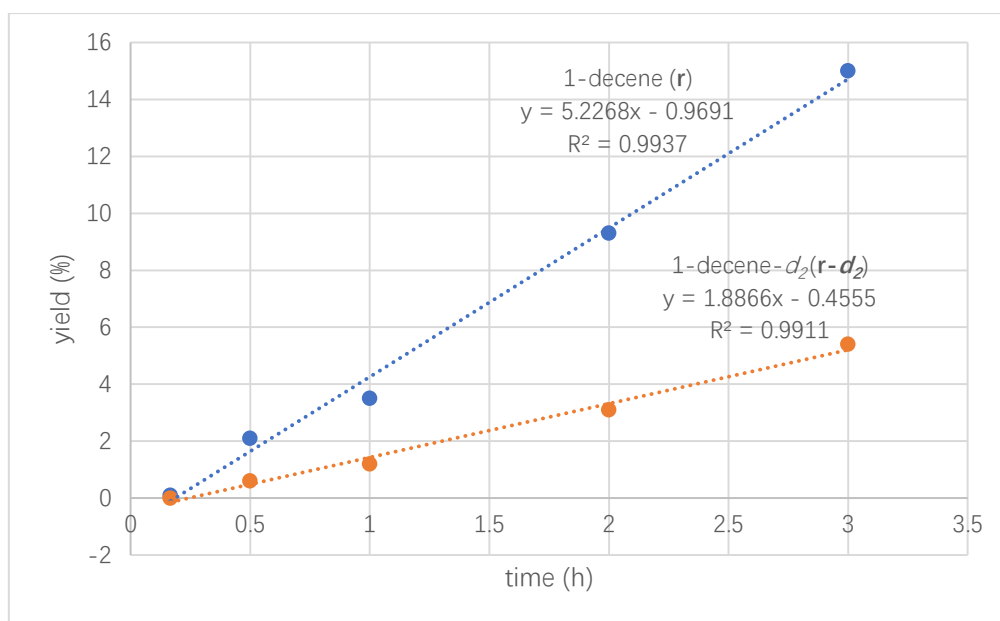

$$k_H/k_D = 5.2268/1.8866 = 2.8$$

## 2. Competition KIE results

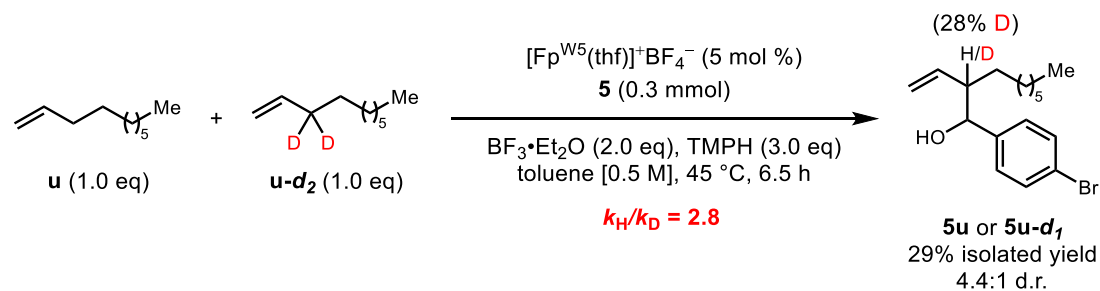

To a flame-dried reaction tube charged with a magnetic stir bar,  $\text{Fp}^{\text{W5}}(\text{thf})\text{BF}_4$  (8.4 mg, 5 mol %), aldehyde **5** (55 mg, 0.3 mmol, 1.0 equiv), alkene **u** (42 mg, 0.3 mmol, 1.0 equiv) or **u-d<sub>2</sub>** (43 mg, 0.3 mmol, 1.0 equiv), dry toluene (0.6 mL),  $\text{BF}_3 \cdot \text{Et}_2\text{O}$  (74  $\mu\text{L}$ , 0.6 mmol, 2.0 equiv), TMPH (152  $\mu\text{L}$ , 0.9 mmol, 3.0 equiv) were added in succession in an argon-filled glovebox. The tube was sealed and placed in an oil bath preheated at 45 °C with vigorous stirring. After 6.5 h, the tube was allowed to cool to room temperature. The crude mixture was concentrated *in vacuo* and purified by flash column chromatography on silica gel to obtain a mixture of **5u** and **5u-d<sub>1</sub>**. The percentage of deuterium in the product was determined based on the area of the deuterated peak over that of the mixture peak. Considering the ratio between the amounts of the two products changes gradually over the course of the reaction, the KIE value was calculated using the following equation:

$$\text{KIE} = \frac{k_{\text{H}}}{k_{\text{D}}} = \frac{\ln(1 - F_{\text{H}})}{\ln(1 - F_{\text{D}})}$$

$F_{\text{H}}$  and  $F_{\text{D}}$  refer to the fraction of conversions for species **u** and **u-d<sub>2</sub>**, respectively.

## Stoichiometric experiments

### 1. Synthesis of Fp<sup>X</sup>-alkene complexes

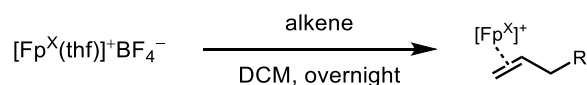

**Gaseous alkenes:** To an oven-dried pressure tube (102 mm × 13 mm, Ace glass, part# 8648-61) charged with a magnetic stir bar, Fp<sup>X</sup>(thf)BF<sub>4</sub> (0.05 mmol, 1.0 equiv) and dry CH<sub>2</sub>Cl<sub>2</sub> (0.5 mL) were added in succession in an argon-filled glovebox. The tube was capped with a PTFE bushing with plunger valve (#7 Ace-Thred) and was taken out of the glovebox cooled in liquid nitrogen. After the whole mixture was frozen, the tube was placed under vacuum. Propylene or 1-butene (10 mL, 8.0 equiv) was condensed into the vacuum tube through the plunger valve, then the tube was resealed and taken out of liquid nitrogen. The mixture was stirred at room temperature overnight. The Fp<sup>X</sup>-alkene complexes were obtained as yellow oils or solids by removing the solvent under reduced pressure and were used in the deprotonation reactions without further purification.

**1-Hexene:** To an oven-dried reaction tube charged with a magnetic stir bar, Fp<sup>X</sup>(thf)BF<sub>4</sub> (0.05 mmol, 1.0 equiv), dry CH<sub>2</sub>Cl<sub>2</sub> (0.5 mL) and 1-hexene (12 μL, 0.1 mmol, 2.0 equiv) were added in succession in an argon-filled glovebox. The tube was capped and taken out of the glovebox. The mixture was stirred at room temperature overnight. The Fp<sup>X</sup>-alkene complexes were obtained as yellow oils or solids by removing the solvent under reduced pressure and were used in the deprotonation reactions without further purification.

### 2. Deprotonation of Fp<sup>X</sup>-alkene complexes

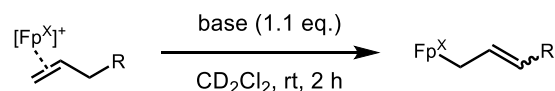

To a 4 mL dram vial, the Fp<sup>X</sup>-alkene complex, CD<sub>2</sub>Cl<sub>2</sub> (0.5 mL) and Et<sub>3</sub>N (7.7 μL, 0.055 mmol, 1.1 equiv) or TMPH (9.4 μL, 0.055 mmol, 1.1 equiv) were added in succession. The mixture was stirred at room temperature for 2 h. The yields were determined by <sup>1</sup>H NMR using 1,3-bis(trifluoromethyl)benzene as the internal standard (Table S2).

**Table S2.** Results of stoichiometric deprotonation experiments.

|                  |                   | <b>Fp*</b>                                               | <b>Fp<sup>W3</sup></b>                 |
|------------------|-------------------|----------------------------------------------------------|----------------------------------------|
| <b>Propylene</b> | Et <sub>3</sub> N | N.P.                                                     | P. 28%<br>SM. 35%                      |
|                  | TMPH              | P. 1%<br>SM. 16%<br>free alkene 4%                       | P. 28%<br>SM. 15%                      |
| <b>1-Butene</b>  | Et <sub>3</sub> N | P. 32%<br>1.3:1 Z/E isomers<br>SM. 22%<br>free alkene 7% | P. 66%<br>1.5:1 Z/E isomers<br>SM. 14% |

|                 |                   |                                                                  |                                               |
|-----------------|-------------------|------------------------------------------------------------------|-----------------------------------------------|
|                 | TMPH              | P. 24%<br>1:2.1 <i>Z/E</i> isomers<br>SM. 14%<br>free alkene 14% | P. 67%<br>1:1.6 <i>Z/E</i> isomers            |
| <b>1-Hexene</b> | Et <sub>3</sub> N | P. 26%<br>SM. 21%<br>free alkene 33%                             | P. 58%<br>1.0:1 <i>Z/E</i> isomers            |
|                 | TMPH              | N.P.<br>SM. 18%<br>free alkene 43%                               | P. 30%<br>1:1.4 <i>Z/E</i> isomers<br>SM. 21% |

### 3. Additional stoichiometric experiments

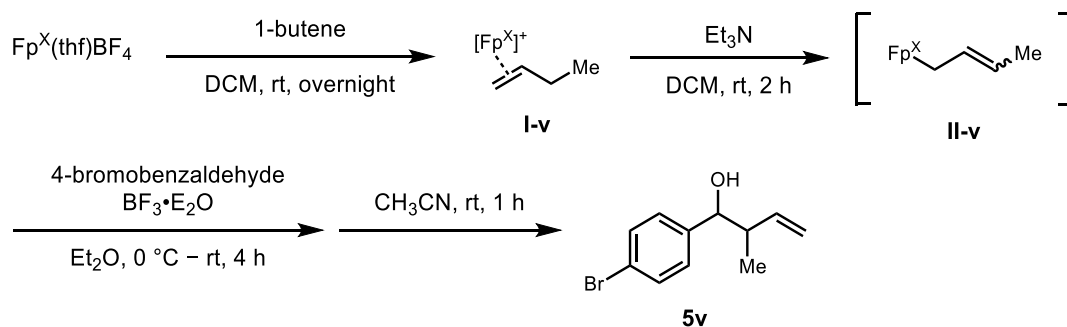

Compound **I-v** was synthesized according to the abovementioned procedure.  $\text{Fp}^*(1\text{-butene})\text{BF}_4$  was prepared on 0.2 mmol scale,  $\text{Fp}^{\text{W}3}(1\text{-butene})\text{BF}_4$  was prepared on 0.1 mmol scale.

Compound **I-v** was transferred to a 4 mL dram vial,  $\text{CH}_2\text{Cl}_2$  (1 mL) and  $\text{Et}_3\text{N}$  (1.1 equiv) were added. After stirring at room temperature for 2 h, the solvent was removed under reduced pressure. The mixture was dissolved in diethyl ether and compound **II-v** was obtained by filtering the solution through a pipet column containing neutral aluminum oxide. After removing the solvent *in vacuo*, the product was immediately subjected to the next step. (Note: The allyliron species is heat sensitive.)

A flame-dried 10 mL round bottom flask was charged with 4-bromobenzaldehyde ( $\text{Fp}^*$ : 18.5 mg, 0.1 mmol, 0.5 equiv;  $\text{Fp}^{\text{W}3}$ : 15.0 mg, 0.08 mmol, 0.8 equiv),  $\text{BF}_3 \cdot \text{Et}_2\text{O}$  (1.5 equiv) and dry diethyl ether (1 mL). The mixture was stirred at 0 °C for 10 min. Compound **II-v** was dissolved in 0.5 mL of dry diethyl ether and the resulting solution was added to the mixture dropwise over 3 min at 0 °C. The mixture was stirred at 0 °C for 1 h and was gradually warmed up to room temperature. After stirring for 3 h, the mixture was concentrated under reduced pressure and redissolved in 1 mL of acetonitrile. The resulting mixture was stirred at room temperature for 1 h. The yield of **5v** over three steps from  $\text{Fp}^{\text{X}}(\text{thf})\text{BF}_4$  was determined by  $^1\text{H}$  NMR using 2,4-dinitrotoluene as the internal standard. Diagnostic peaks are in agreement with those of the known compound **5v** reported in the literature.<sup>12</sup>

## Characterization data for Fp<sup>X</sup>-alkene complexes

The <sup>13</sup>C NMR data for the Fp<sup>W3</sup>-alkene complexes are ambiguous and therefore only spectra are included. Fp\*-alkene complexes are impure and presumably contain solvated species. Peaks that are assigned to the desired products are reported.

### Fp<sup>W3</sup>(propene)BF<sub>4</sub> (wrh-05-125A)

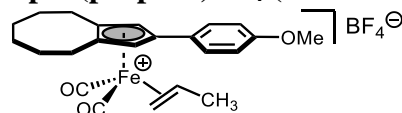

<sup>1</sup>H NMR (500 MHz, CD<sub>2</sub>Cl<sub>2</sub>) δ 7.59 – 7.55 (m, 2H), 7.04 – 7.00 (m, 2H), 5.93 (d, *J* = 2.0 Hz, 1H), 5.79 (d, *J* = 1.9 Hz, 1H), 4.23 – 4.13 (m, 1H), 3.86 (s, 3H), 3.22 (d, *J* = 14.6 Hz, 1H), 3.03 (d, *J* = 8.1 Hz, 1H), 2.81 (ddt, *J* = 27.4, 13.7, 3.9 Hz, 2H), 2.49 (qd, *J* = 13.3, 4.6 Hz, 2H), 2.08 – 1.98 (m, 2H), 1.74 – 1.33 (complex multiplet).

<sup>19</sup>F NMR (470 MHz, CD<sub>2</sub>Cl<sub>2</sub>) δ –149.6.

HRMS (ESI) calcd for C<sub>20</sub>H<sub>21</sub>O<sub>3</sub>Fe [M–BF<sub>4</sub>–C<sub>3</sub>H<sub>6</sub>]<sup>+</sup>: 365.0835, found: 365.0846.

### Fp<sup>W3</sup>(1-butene)BF<sub>4</sub> (wrh-05-70-1, 05-125B)

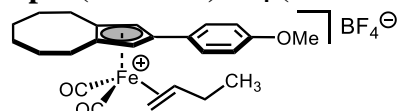

<sup>1</sup>H NMR (300 MHz, CD<sub>2</sub>Cl<sub>2</sub>) δ 7.58 (d, *J* = 8.5 Hz, 2H), 7.02 (d, *J* = 8.3 Hz, 2H), 5.92 (s, 1H), 5.83 (s, 1H), 4.29 – 4.13 (m, 1H), 3.86 (s, 3H), 3.21 (d, *J* = 14.6 Hz, 1H), 2.99 (d, *J* = 8.0 Hz, 1H), 2.89 – 2.71 (m, 2H), 2.59 – 2.40 (m, 2H), 2.39 – 2.26 (m, 1H), 2.11 – 1.29 (complex multiplet), 0.97 (t, *J* = 7.2 Hz, 3H).

<sup>19</sup>F NMR (282 MHz, CD<sub>2</sub>Cl<sub>2</sub>) δ –151.4.

HRMS (ESI) calcd for C<sub>24</sub>H<sub>29</sub>O<sub>3</sub>Fe [M–BF<sub>4</sub>]<sup>+</sup>: 421.1461, found: 421.1470.

### Fp<sup>W3</sup>(1-hexene)BF<sub>4</sub> (wrh-05-125C)

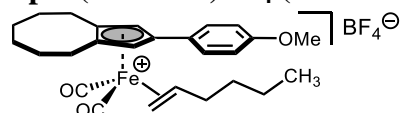

<sup>1</sup>H NMR (500 MHz, CD<sub>2</sub>Cl<sub>2</sub>) δ 7.57 (d, *J* = 8.8 Hz, 2H), 7.03 (d, *J* = 8.8 Hz, 2H), 5.90 (d, *J* = 1.7 Hz, 1H), 5.81 (d, *J* = 1.7 Hz, 1H), 4.19 – 4.09 (m, 1H), 3.86 (s, 3H), 3.19 (d, *J* = 14.6 Hz, 1H), 3.04 (d, *J* = 8.1 Hz, 1H), 2.85 – 2.74 (m, 2H), 2.55 – 2.43 (m, 2H), 2.38 – 2.29 (m, 1H), 2.08 – 1.98 (m, 2H), 1.92 – 1.12 (complex multiplet), 0.84 (t, *J* = 7.2 Hz, 3H).

<sup>19</sup>F NMR (470 MHz, CD<sub>2</sub>Cl<sub>2</sub>) δ –151.5.

HRMS (ESI) calcd for C<sub>26</sub>H<sub>33</sub>O<sub>3</sub>Fe [M–BF<sub>4</sub>]<sup>+</sup>: 449.1774, found: 449.1783.

### Fp\*(propene)BF<sub>4</sub> (wrh-05-125D)

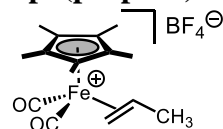

<sup>1</sup>H NMR (500 MHz, CD<sub>2</sub>Cl<sub>2</sub>) δ 4.12 – 4.00 (m, 1H), 3.23 (d, *J* = 14.4 Hz, 1H), 2.95 (d, *J* = 8.1 Hz, 1H), 1.92 (s, 15H), 1.78 – 1.72 (complex multiplet).

<sup>13</sup>C NMR (100 MHz, CD<sub>2</sub>Cl<sub>2</sub>) δ 212.6, 212.2, 102.0, 98.1, 84.4, 21.9, 9.5.

<sup>19</sup>F NMR (470 MHz, CD<sub>2</sub>Cl<sub>2</sub>) δ –152.4.

**HRMS** (ESI) calcd for  $C_{15}H_{21}O_2Fe [M-BF_4]^+$ : 289.0885, found: 289.0896.

**Fp\*(1-butene)BF<sub>4</sub> (wrh-Fp', wrh-05-73-2B)**

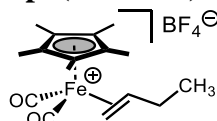

**<sup>1</sup>H NMR** (300 MHz, CD<sub>2</sub>Cl<sub>2</sub>) δ 4.12 – 3.92 (m, 1H), 3.20 (d, *J* = 14.4 Hz, 1H), 2.89 (d, *J* = 8.1 Hz, 1H), 2.43 – 2.25 (m, 1H), 1.90 (s, 15H), 1.54 – 1.34 (m, 1H), 1.12 (t, *J* = 7.2 Hz, 3H).

**<sup>13</sup>C NMR** (100 MHz, CD<sub>2</sub>Cl<sub>2</sub>) δ 212.6, 212.3, 102.2, 98.1, 90.3, 30.1, 16.6, 9.5, 9.3.

**<sup>19</sup>F NMR** (282 MHz, CD<sub>2</sub>Cl<sub>2</sub>) δ –152.1.

**HRMS** (ESI) calcd for  $C_{16}H_{23}O_2Fe [M-BF_4]^+$ : 303.1042, found: 303.1043.

**Fp\*(1-hexene)BF<sub>4</sub> (wrh-05-125E)**

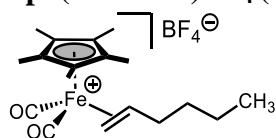

**<sup>1</sup>H NMR** (500 MHz, CD<sub>2</sub>Cl<sub>2</sub>) δ 4.00 – 3.89 (m, 1H), 3.18 (d, *J* = 14.4 Hz, 1H), 2.91 (d, *J* = 8.1 Hz, 1H), 2.40 – 2.28 (m, 1H), 1.92 (s, 15H), 1.72 – 1.22 (complex multiplet), 0.93 (t, *J* = 7.0 Hz, 3H).

**<sup>13</sup>C NMR** (100 MHz, CD<sub>2</sub>Cl<sub>2</sub>) δ 212.5, 212.3, 102.1, 98.1, 88.3, 36.8, 35.1, 22.6, 13.8, 9.5, 9.3.

**<sup>19</sup>F NMR** (470 MHz, CD<sub>2</sub>Cl<sub>2</sub>) δ –152.5.

**HRMS** (ESI) calcd for  $C_{18}H_{27}O_2Fe [M-BF_4]^+$ : 331.1355, found: 331.1366.

**Characterization data for allyliron species**

The allyliron species decomposed gradually within one hour under air. Purification of these compounds is challenging because they are unstable on the silica gel and their oily nature renders recrystallization impossible. NMR spectra of the crude products are reported.

**(II-a-Fp)<sup>W3</sup>, WRH-05-40A)**

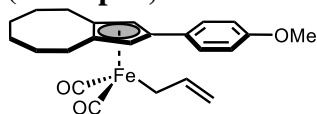

This compound was obtained by filtering the solution of the reaction mixture through a plug of celite.

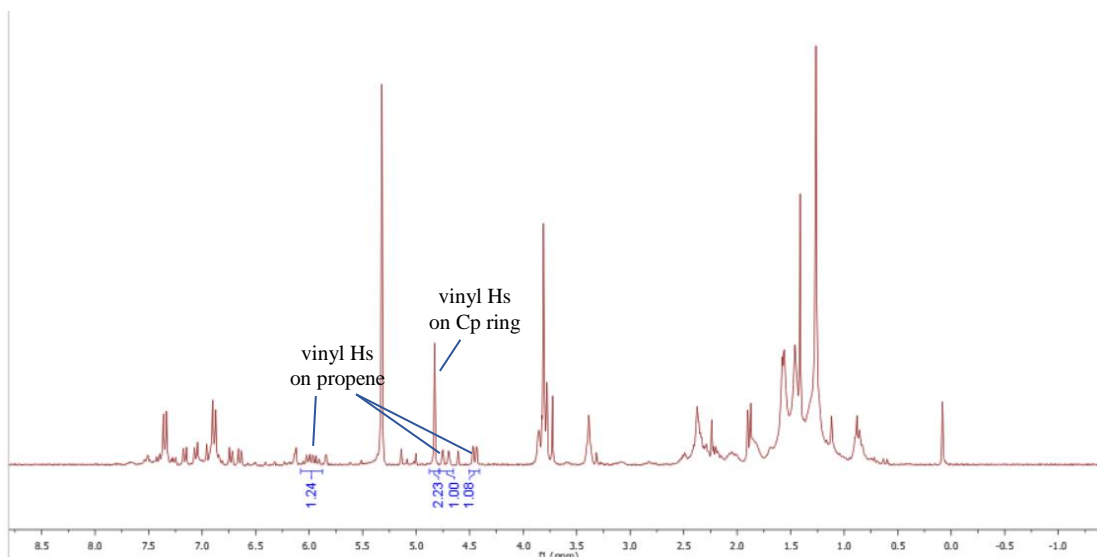

**(II-s-Fp)<sup>W3</sup>, WRH-05-51B)**

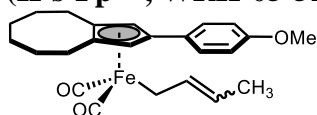

<sup>1</sup>H NMR (300 MHz, CD<sub>2</sub>Cl<sub>2</sub>) δ 7.39 – 7.30 (m, 2H), 6.92 – 6.85 (m, 2H), 5.73 – 5.53 (m, 1H), 5.20 (dq, *J* = 12.9, 6.4 Hz, 0.5H), 5.06 – 4.93 (m, 0.5H), 4.88 (s, 1H), 4.80 (s, 1H), 3.81 (s, 3H), 2.43 – 2.30 (m, 4H), 1.95 – 1.88 (m, 2H), 1.88 – 1.76 (m, 2H), 1.55 – 1.42 (complex multiplet).

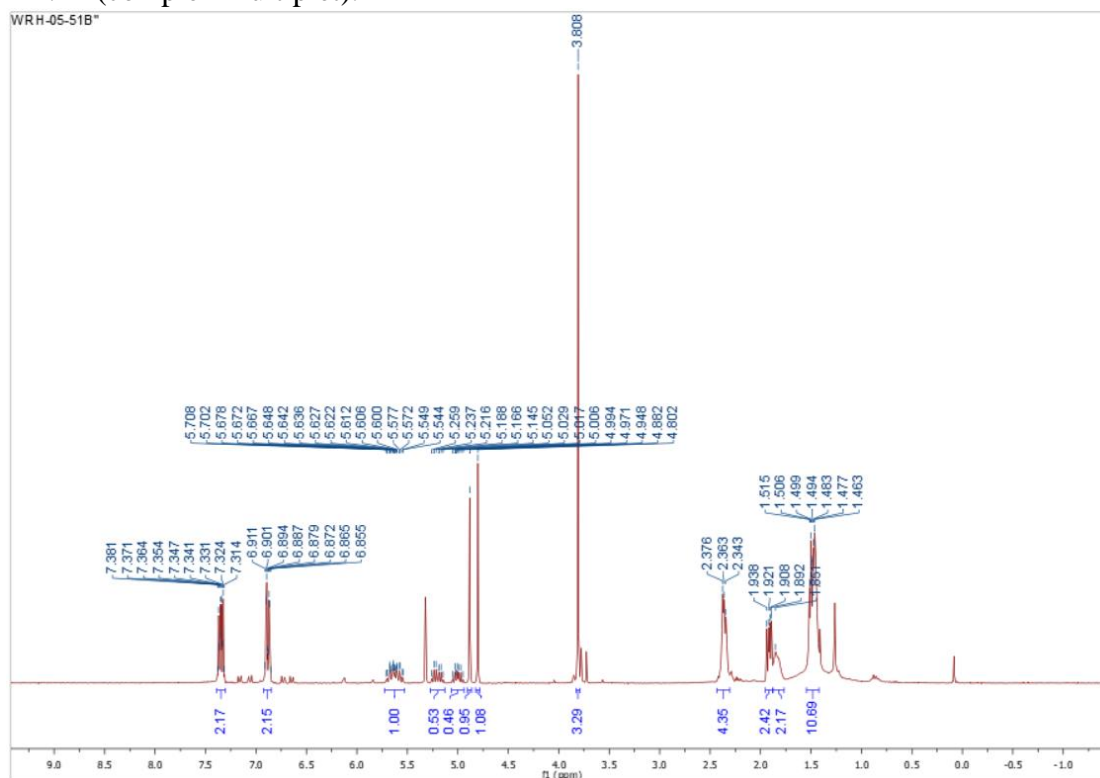

**(II-t-Fp)<sup>W3</sup>, wrh-05-126B)**

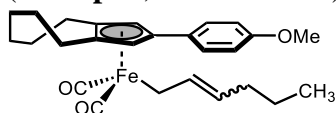



$^1\text{H NMR}$  (500 MHz,  $\text{CD}_2\text{Cl}_2$ )  $\delta$  7.35 (t,  $J = 8.3$  Hz, 2H), 6.89 (dd,  $J = 8.7, 2.9$  Hz, 2H), 5.66 – 5.55 (m, 1H), 5.27 – 5.18 (m, 0.5H), 4.97 – 4.90 (m, 0.5H), 4.88 (s, 1H), 4.81 (s, 1H), 3.81 (s, 3H), 2.36 (d,  $J = 10.9$  Hz, 5H), 1.96 – 1.76 (m, 7H), 1.52 – 1.21 (complex multiplet), 0.86 (dt,  $J = 14.4, 7.3$  Hz, 3H).

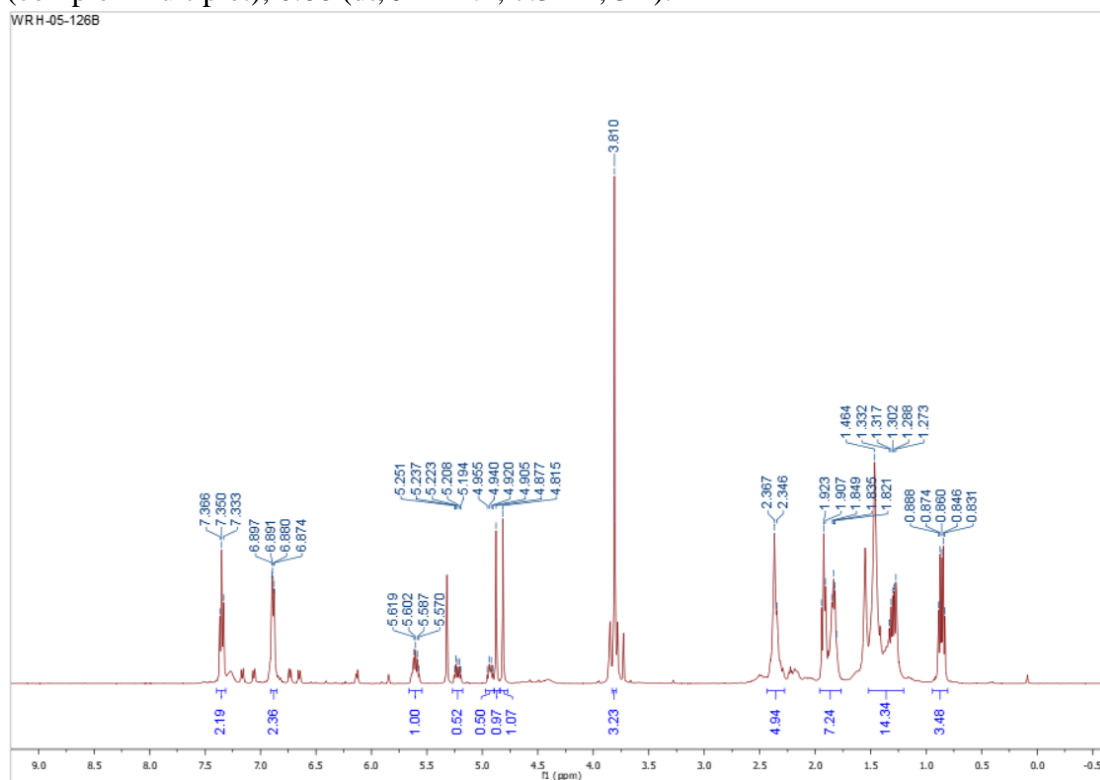

(**II-s-Fp\***, wrh-05-84-2)

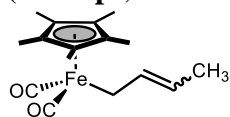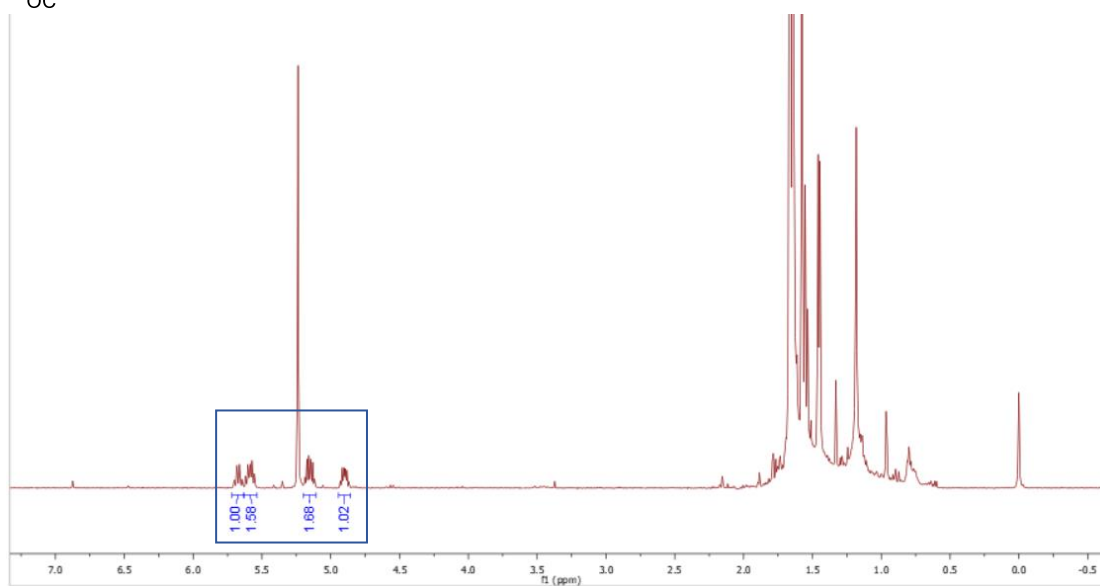

(**II-t-Fp\***, wrh-05-126C)

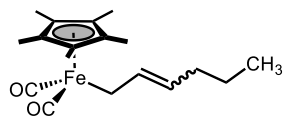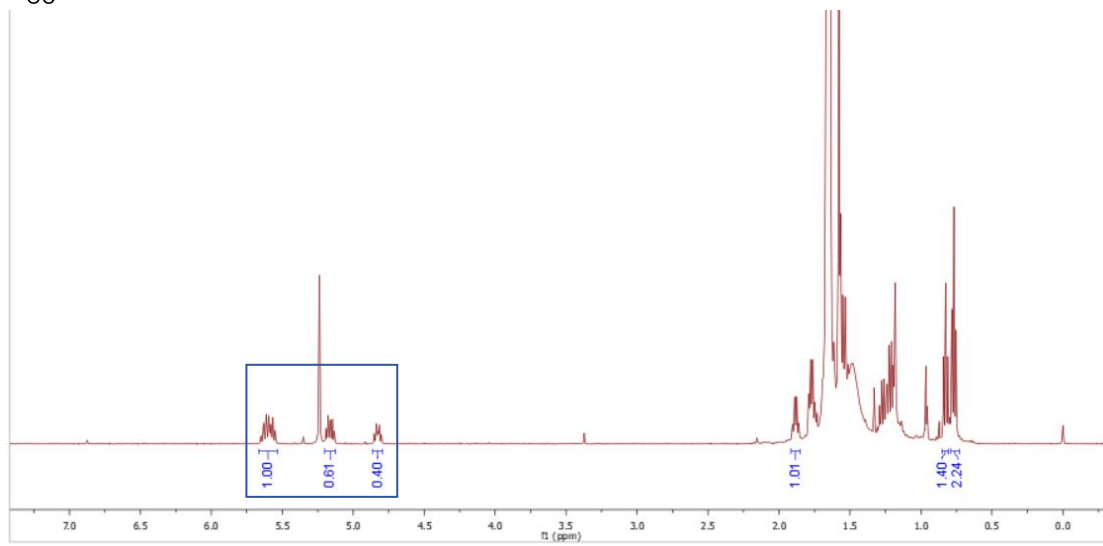

## DFT calculations

### 1. Computational Details

All density functional theory (DFT) calculations were carried out using Gaussian 16.<sup>13</sup> Conformational search was carried out using the CREST program<sup>14</sup> with the GFN2-xTB method.<sup>15</sup> The CREST conformational search was performed using the generalized Born model with solvent accessible surface (GBSA) in toluene solvent. An energy windows of 9.0 kcal/mol and an RMSD threshold of 0.75 Å was used. In the CREST/GFN2-xTB conformer search of transition state structures, forming and breaking bonds were constrained to the corresponding distances obtained from the DFT-optimized structures. Low-energy conformers from CREST/GFN2-xTB were then reoptimized using DFT. DFT geometry optimizations were performed in the gas phase using the dispersion-corrected B3LYP<sup>16</sup>-D3(BJ) functional, which includes Grimme's DFT-D3 dispersion correction<sup>17</sup> with Becke-Johnson (BJ) damping.<sup>18</sup> A mixed basis set of SDD<sup>19</sup> for Fe and 6-31G(d) for other atoms was used in geometry optimizations. Vibrational frequency calculations were performed for all the stationary points to confirm if each optimized structure is a minimum or a transition state structure. Single point energies were calculated using the M06 functional<sup>20</sup> with a mixed basis set of SDD for Fe and 6-311+G(d,p) for other atoms. Solvation energy corrections were calculated in single point energy calculations with the SMD continuum solvation model.<sup>21</sup> In the deprotonation step, solvation energies were calculated in both dichloromethane (Figure 1c) and toluene (Figure S6). In all other calculations, toluene was used as the solvent. Only the lowest energy conformers from the DFT calculations were reported in the main text. Selected higher energy conformers are discussed in the Supporting Information (*vide infra*). We have considered both the singlet and triplet spin states of the Fe complexes. The wavefunction stability of Fe complexes was confirmed by using the "stable=opt" keyword in Gaussian. The triplet spin state of complexes **41** and **43** is 11.9 and 16.3 kcal/mol less stable than corresponding closed-shell singlet complexes, respectively. Therefore, only the more stable singlet spin state is reported in this computational study.

DLPNO-CCSD(T)<sup>22</sup> calculations were carried out using ORCA 5.0.<sup>23</sup> DLPNO-CCSD(T) single point energy calculations were performed with the def2-TZVP basis set and def2-TZVP/C auxiliary basis set using the B3LYP-D3-optimized geometries. In the HF step, RIJCOSX approximations<sup>24</sup> with the def2/J auxiliary basis set was used. The SMD solvation model and toluene solvent were used in the DLPNO-CCSD(T) single point energy calculations.

The reported Gibbs free energies and enthalpies include thermal corrections at 298.15 K calculated at the B3LYP-D3(BJ)/SDD-6-31G(d) level (*i.e.*, the same level as geometry optimization). Gibbs free energies in Figure 1a contain concentration corrections to 1 mol/L and translational-entropy corrections.<sup>25</sup> GoodVibes 3.0.2<sup>26</sup> was used to compute Gibbs free energies with Grimme's quasi-harmonic oscillator approximation.<sup>27</sup>

Images of 3D molecular structures were generated using CYLview.<sup>28</sup>

## 2. Additional Computational Results

### C–H Deprotonation Pathway Leading to *cis*-allyliron Intermediate

We computed the deprotonation pathway leading to *cis*-allyliron intermediate **43'** (Figure S1). The C–H deprotonation transition state leading to **43'** (**TS1'**) is 0.3 kcal/mol less stable than the deprotonation transition state leading to the *trans* isomer (**TS1**). The small energy difference between **TS1** and **TS1'** indicate that the *cis*-deprotonation pathway is competing. From the *cis*-allyliron intermediate **43'**, the aldehyde addition favors the same diastereomeric product as in the *trans*-deprotonation pathway discussed in Figure 1 in the main text. T-shaped  $\pi/\pi$  interactions between the Ph group on the benzaldehyde substrate and the *p*-OMe phenyl group on the ligand were observed in both **cis-TS2** and **cis-TS2'**, which demonstrates the importance of the  $\pi/\pi$  interactions with the ligand in confining the substrate orientation in the transition states. The more favorable transition state **cis-TS2** ( $\Delta G^\ddagger = 20.9$  kcal/mol) is stabilized by C–H $\cdots$ F interactions between the  $sp^2$  C–H bond on the ligand and the F atom on the  $\text{BF}_3$ •aldehyde complex. The C–H $\cdots$ F interaction with the ligand was not observed in the less favorable **cis-TS2'** ( $\Delta G^\ddagger = 22.0$  kcal/mol), in which the  $\text{BF}_3$  moiety points away from the Cp ligand.

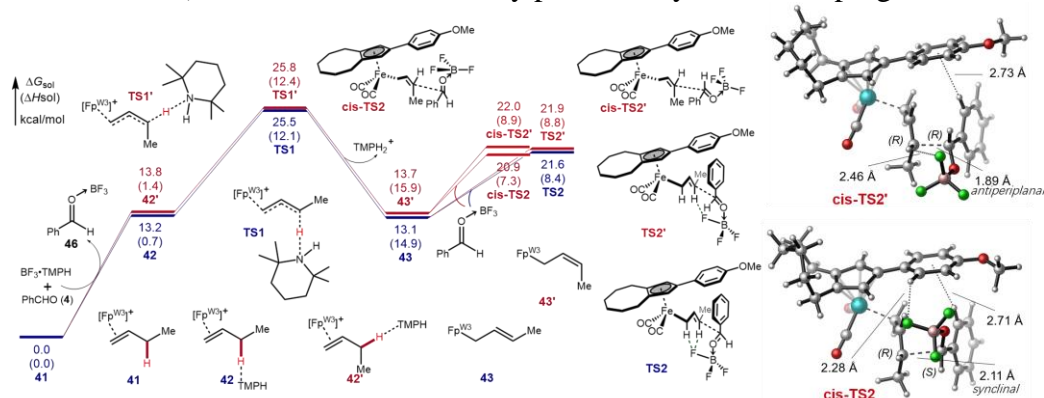

**Figure S1.** Reaction energy profile of the competing pathways involving *cis*-allyliron intermediate **43'**.

### Benchmark of Computational Methods for Diastereoselectivity Prediction

The relative Gibbs free energies between the diastereoselectivity-determining aldehyde addition transition states (**TS2** and **TS2'**) were computed using three level of theories. In addition to the reaction between 1-butene and benzaldehyde (Figure 1), the transition states in the reactions between 1-octene and *para*-bromobenzaldehyde and between 1-butene and *para*-bromobenzaldehyde were also computed. These calculations indicated that **TS2** is more favorable than **TS2'** regardless of the computational methods and substrates used in the calculations. The DLPNO-CCSD(T) calculations provided better agreement with the experimentally observed diastereoselectivity compared to the Gibbs free energy differences computed using M06 and  $\omega$ B97X-D methods.

**Table S1.** Computed Gibbs free energy difference ( $\Delta\Delta G^\ddagger$ ) between diastereoselectivity-determining aldehyde addition transition states (**TS2** and **TS2'**) using three different levels of theories.<sup>a</sup>

| Reaction                           | Method <sup>b</sup>                   |                                |                              |
|------------------------------------|---------------------------------------|--------------------------------|------------------------------|
|                                    | M06/<br>6-311+G(d,p)-SDD <sup>a</sup> | $\omega$ B97X-D/<br>def2-TZVPP | DLPNO-CCSD(T)/<br>def2-TZVPP |
| <b>1-butene + PhCHO</b>            | 0.3                                   | 0.3                            | 0.9                          |
| <b>1-octene + <i>p</i>-BrPhCHO</b> | 0.3                                   | 0.3                            | 0.6                          |
| <b>1-butene + <i>p</i>-BrPhCHO</b> | 0.3                                   | 0.3                            | 0.7                          |

<sup>a</sup>All energies are in kcal/mol. <sup>b</sup>Method for single point energy calculations. The SMD(toluene) solvent model was used in all single point energy calculations. Geometry optimizations were performed at the B3LYP-D3(BJ)/SDD-6-31G(d) level for all calculations.

### Conformers of Aldehyde Addition Transition States

Select higher energy conformers of the aldehyde addition transition states **TS2** and **TS2'** are shown in Figures S2–S3. Both conformers of the *p*-OCH<sub>3</sub> group were considered (*e.g.*, **TS2/TS2-1** and **TS2'/TS2'-1**). The *p*-OCH<sub>3</sub> conformation has a relatively small impact on the TS energy. Rotamers about the forming C–C bond were also considered. In these rotamers, such as **TS2-2** and **TS2-3**, the lack of  $\pi/\pi$  interaction between the ligand and the benzaldehyde Ph group leads to their higher energies compared to **TS2**. Similarly, several conformers of **TS2'** that lack  $\pi/\pi$  interactions (*e.g.*, **TS2'-2** and **TS2'-3**) were located and are higher in energy than **TS2'**. **TS2** and **TS2'** are the most stable conformers of the transition states.

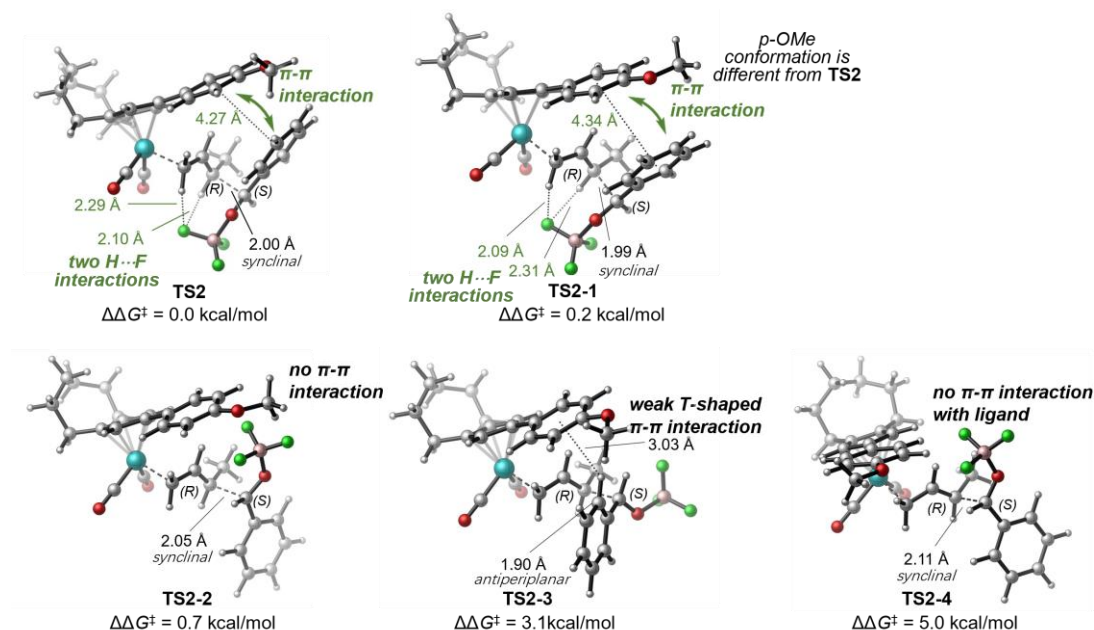

**Figure S2.** Select conformers of **TS2**.

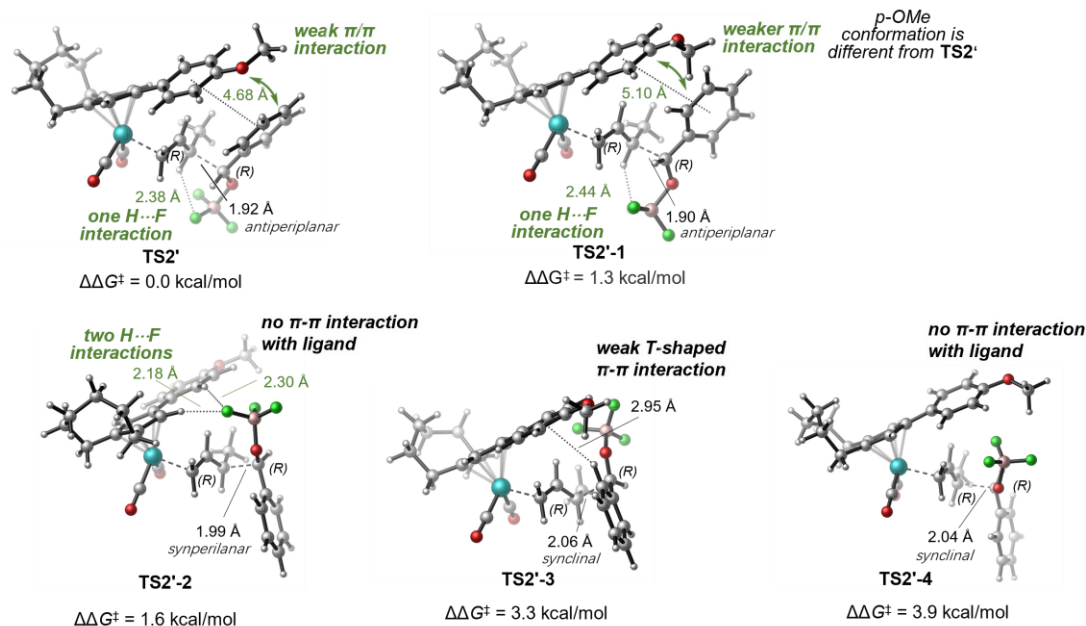

**Figure S3.** Select conformers of **TS2'**.

### Ligand–Substrate Dispersion Energies

Dispersion energies between the  $\text{Cp}^{\text{W}3}$  ligand on the  $\text{Fp}^{\text{W}3}$  catalyst and the  $\text{BF}_3$ -coordinated benzaldehyde in transition states **TS2** and **TS2'** were calculated using Grimme's DFT-D3 program using HF as the reference "functional". The complexes of the  $\text{Cp}^{\text{W}3}$  ligand and the  $\text{BF}_3$ -coordinated benzaldehyde substrate were taken from the optimized geometries of **TS2** and **TS2'** by removing other atoms (*i.e.*, the Fe, CO ligands, and the allyl group). Because the HF method can be considered "dispersion-free", the D3 dispersion correction to HF describes the overall dispersion energy for each fragment. The dispersion energy of the ligand–substrate complex minus the sum of dispersion energies of the two fragments was calculated as the dispersion interaction energy ( $\Delta E_{\text{disp}}$ ) between the two fragments.

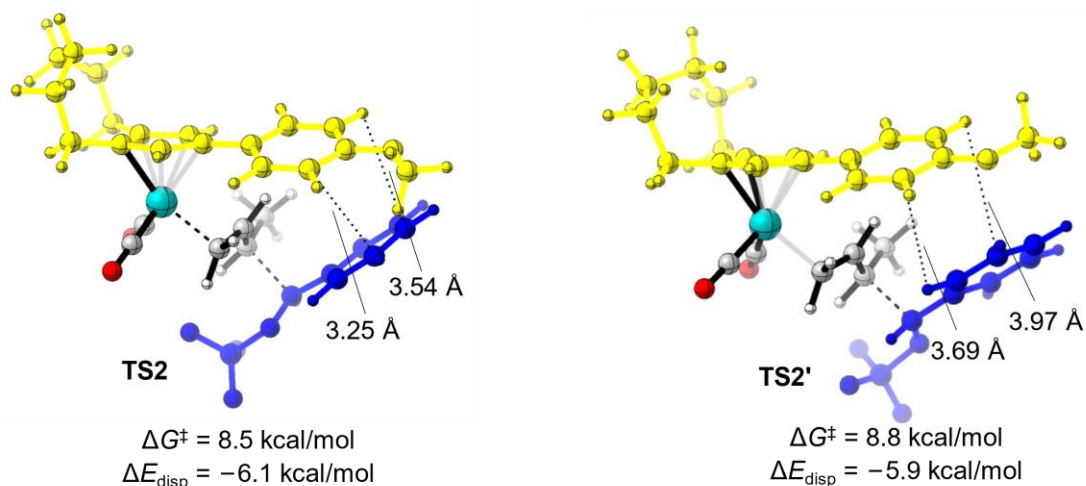

**Figure S4.** Dispersion interaction energy between ligand and benzaldehyde in **TS2** and **TS2'**.

## NPA Charge Calculations

The computed NPA charges (Figure S5) show that the  $\alpha$  and  $\gamma$  H atoms in **TS2** and **TS2'** are both positively charged (0.23~0.26), whereas the F atom on the carbonyl-coordinated  $\text{BF}_3$  group is negatively charged ( $-0.57\sim-0.58$ ). The H atoms in **TS2** and **TS2'** are slightly more positively charged than those in the allyl Fe intermediate **43** and the  $\text{C}(sp^2)\text{-H}$  and  $\text{C}(sp^3)\text{-H}$  in butene. These results suggest relatively strong H...F interactions in **TS2** and **TS2'**.

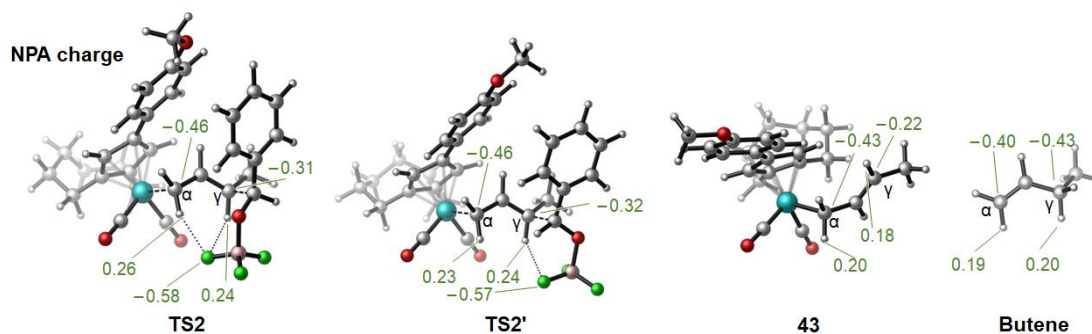

**Figure S5.** Computed NPA charges of select H and F atoms of **TS2**, **TS2'**, the allyl iron intermediate **43**, and butene.

## Driving Force of the Overall Reaction

In the computed reaction energy profile (Figure 1 in the main text), the aldehyde addition leads to zwitterionic complexes **44** and **44'**, which subsequently undergo ligand exchange to liberate the ionic allylic functionalization products (**45**, **45'**). This process is facilitated by hydrogen-bonding in **45** and **45'** between tetramethylpiperidinium ( $\text{TMPH}_2^+$ ) and the anionic alkoxytrifluoroborate moiety,<sup>29</sup> which upon work-up give the neutral homoallylic alcohol products. The hydrogen bonding in **45** and **45'** was found to provide an important thermodynamic driving force to the overall reaction, as the reaction of 1-butene and benzaldehyde to form the major homoallylic alcohol as a neutral species is endergonic by 7.9 kcal/mol, rendering the overall reaction thermodynamically unfavorable in the absence of stoichiometric amounts of Lewis acid and base to stabilize the ammonium alkoxytrifluoroborate product.

## C–H Deprotonation Pathways Computed in Toluene

The C–H deprotonation in toluene (Figure S6) is more endergonic and requires higher activation barriers than in the more polar  $\text{CH}_2\text{Cl}_2$  solvent (Figure 1c). The same ligand effects were observed in toluene solvent. The deprotonation with the  $\text{Fp}^{\text{W3}}$  catalyst requires a 1.3 kcal/mol lower activation barrier than that with the  $\text{Fp}^*$  catalyst (Figure S6).

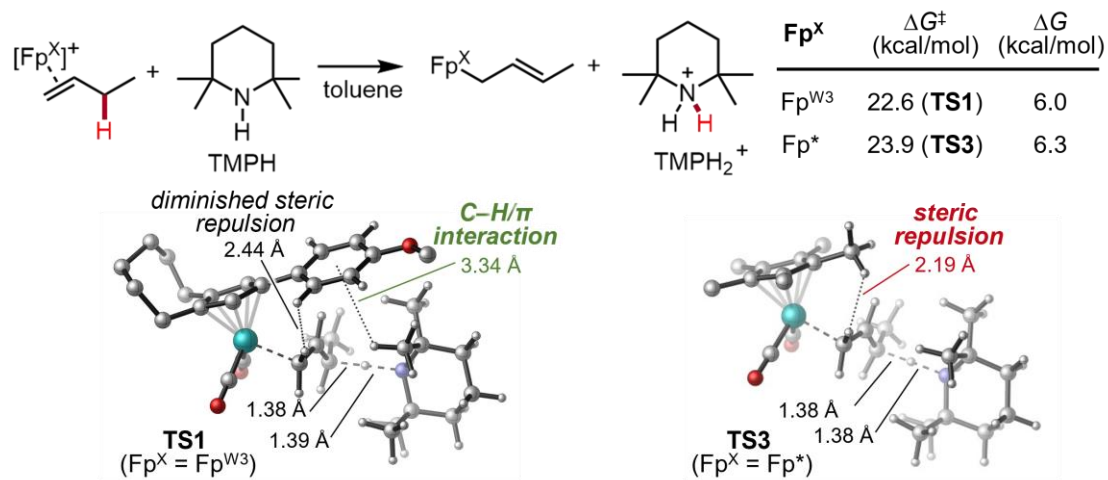

**Figure S6.** Computed C–H deprotonation pathways in toluene.



## Procedures for substrate synthesis and characterization data

### General procedure B1

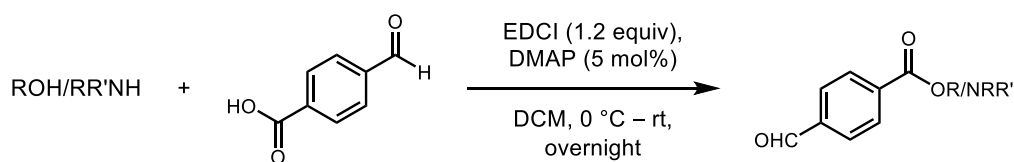

Alcohol or amine (1.0 equiv, 0.2 M in CH<sub>2</sub>Cl<sub>2</sub>), 4-formylbenzoic acid (1.0 equiv) and DMAP (5 mol %) were dissolved in CH<sub>2</sub>Cl<sub>2</sub>, the resulting solution was cooled in ice bath. EDCI (1.2 equiv) was added to the solution at 0 °C. The mixture was stirred at room temperature overnight. Then the mixture was washed by water (3 × 10 mL). The organic layer was dried over magnesium sulfate and the solvent was removed under reduced pressure. The crude residue was purified by column chromatography to afford the products.

### General procedure B2

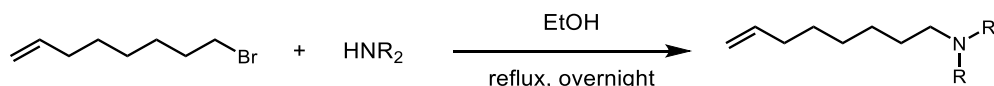

A 250 mL round bottom flask was charged with 8-bromo-1-octene (1.7 mL, 10 mmol, 1.0 equiv), amine (6.0 equiv) and ethanol (60 mL). The reaction mixture was heated at reflux overnight. After completion, the mixture was concentrated in vacuo and diluted with EtOAc (30 mL). The resulting mixture was washed with saturated Na<sub>2</sub>CO<sub>3</sub> solution (3 × 10 mL). The organic layer was dried over magnesium sulfate and concentrated under reduced pressure. The crude residue was purified by column chromatography to afford the products.

## Characterization data for substrates

### 5-(2,5-Dimethylphenoxy)-2,2-dimethylpentanal (20, PBS-23-2)

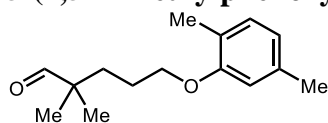

This compound was synthesized according to the following procedure.

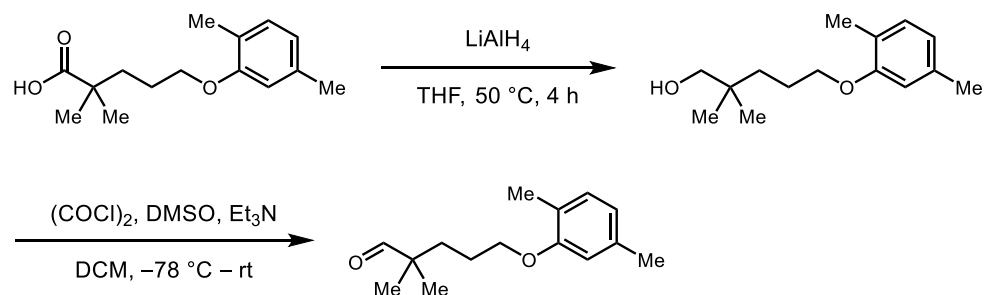

The solution of gemfibrozil (1.25 g, 5.0 mmol, 1.0 equiv) in 20 mL of dry THF was added dropwise to the suspension of LiAlH<sub>4</sub> (949 mg, 25 mmol, 5.0 equiv) in 40 mL of dry THF at 0 °C. The mixture was stirred in a 50 °C oil bath for 4 hours. Then the mixture was quenched by slow addition of 10% NaOH solution at 0 °C until no

bubbles were formed. The resulting white precipitates were filtered out through a pad of celite and washed with EtOAc. The filtrate was concentrated under reduced pressure and the residue was purified by column chromatography (5:1 hexanes/EtOAc) to afford the alcohol product as a pale yellow liquid (1.13 g, 96% yield).

DMSO (1.0 mL, 14.4 mmol, 3.0 equiv) was added dropwise to the solution of oxalyl chloride (0.8 mL, 9.6 mmol, 2.0 equiv) in 25 mL of dry CH<sub>2</sub>Cl<sub>2</sub> at -78 °C. After stirring at -78 °C for 15 min, the alcohol obtained from last step (1.13 g, 4.8 mmol, 1.0 equiv) was added. The mixture was stirred at -78 °C for another 15 min, then Et<sub>3</sub>N (3.4 mL, 24.0 mmol, 5.0 equiv) was added. The mixture was gradually warmed to room temperature and was stirred overnight. After completion, the mixture was quenched with saturated aqueous solution of NaHCO<sub>3</sub> (15 mL), followed by extraction with CH<sub>2</sub>Cl<sub>2</sub> (3 × 30 mL). The combined organic layers were dried over magnesium sulfate and the solvent was removed under reduced pressure. Purification by column chromatography (60:1 → 50:1 hexanes/EtOAc) afforded the aldehyde product as a colorless liquid (979 mg, 87% yield).

<sup>1</sup>H NMR (500 MHz, CDCl<sub>3</sub>) δ 9.50 (s, 1H), 7.01 (d, *J* = 7.5 Hz, 1H), 6.67 (d, *J* = 7.5 Hz, 1H), 6.61 (s, 1H), 3.93 (t, *J* = 5.8 Hz, 2H), 2.31 (s, 3H), 2.18 (s, 3H), 1.77 – 1.65 (m, 4H), 1.11 (s, 6H).

<sup>13</sup>C NMR (125 MHz, CDCl<sub>3</sub>) δ 206.2, 157.0, 136.6, 130.4, 123.7, 120.9, 112.1, 67.9, 45.7, 33.7, 24.6, 21.52, 21.46, 15.9.

HRMS (ESI) calcd for C<sub>15</sub>H<sub>23</sub>O<sub>2</sub> [M+H]<sup>+</sup>: 235.1693, found: 235.1690.

#### 1-Benzylcyclopentane-1-carbaldehyde (21, PBS-24-2)

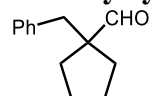

This compound was prepared following literature procedure.<sup>30</sup>

<sup>1</sup>H NMR (500 MHz, CDCl<sub>3</sub>) δ 9.49 (s, 1H), 7.22 – 7.15 (m, 2H), 7.15 – 7.09 (m, 1H), 7.07 – 7.01 (m, 2H), 2.85 (s, 2H), 1.90 – 1.80 (m, 2H), 1.62 – 1.41 (m, 6H).

<sup>13</sup>C NMR (125 MHz, CDCl<sub>3</sub>) δ 205.2, 138.0, 130.0, 128.4, 126.5, 59.3, 41.2, 32.4, 24.9.

HRMS (ESI) calcd for C<sub>12</sub>H<sub>15</sub> [M-CHO]<sup>+</sup>: 159.1168, found: 159.1166.

#### 4-Benzyl-1-tosylpiperidine-4-carbaldehyde (22, wrh-04-138-1)

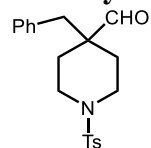

This compound was prepared from methyl 4-piperidinecarboxylate following literature procedure.<sup>30</sup>

**m.p.** = 128 – 130 °C.

<sup>1</sup>H NMR (500 MHz, CDCl<sub>3</sub>) δ 9.40 (s, 1H), 7.57 (d, *J* = 8.2 Hz, 2H), 7.31 – 7.21 (m, 5H), 7.03 – 6.97 (m, 2H), 3.67 – 3.57 (m, 2H), 2.73 (s, 2H), 2.42 (s, 3H), 2.27 (td, *J* = 12.1, 2.1 Hz, 2H), 2.03 (d, *J* = 13.9 Hz, 2H), 1.72 (td, *J* = 13.5, 4.3 Hz, 2H).

<sup>13</sup>C NMR (125 MHz, CDCl<sub>3</sub>) δ 205.4, 143.8, 134.8, 133.1, 130.2, 129.9, 128.6, 127.7, 127.2, 48.9, 43.6, 43.5, 30.3, 21.7.

HRMS (ESI) calcd for C<sub>20</sub>H<sub>24</sub>O<sub>3</sub>NS [M+H]<sup>+</sup>: 358.1471, found: 358.1468.

#### 4-Benzyltetrahydro-2H-pyran-4-carbaldehyde (23, wrh-04-135-2)

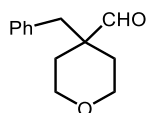

This compound was prepared from methyl tetrahydropyran-4-carboxylate following literature procedure.<sup>30</sup>

<sup>1</sup>H NMR (400 MHz, CDCl<sub>3</sub>) δ 9.51 (s, 1H), 7.24 – 7.13 (m, 3H), 7.01 – 6.96 (m, 2H), 3.81 – 3.72 (m, 2H), 3.32 (td, *J* = 11.8, 2.5 Hz, 2H), 2.73 (s, 2H), 1.88 – 1.79 (m, 2H), 1.65 – 1.54 (m, 2H).

<sup>13</sup>C NMR (100 MHz, CDCl<sub>3</sub>) δ 206.0, 135.3, 130.3, 128.5, 127.0, 64.9, 48.7, 43.8, 31.3.

HRMS (ESI) calcd for C<sub>12</sub>H<sub>15</sub>O [M-CHO]<sup>+</sup>: 175.1117, found: 175.1115.

### 1,3,3-Trimethylbicyclo[2.2.1]heptan-2-yl 4-formylbenzoate (25, wrh-04-118)

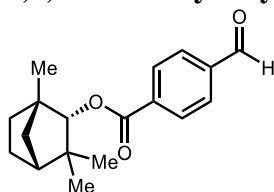

This compound was prepared from fenchyl alcohol (820 μL, 5.0 mmol, 1.0 equiv) according to general procedure B1. The compound was obtained as a white solid (942 mg, 66% yield, eluent: 60:1 hexanes/EtOAc).

**m.p.** = 61 – 63 °C.

<sup>1</sup>H NMR (500 MHz, CDCl<sub>3</sub>) δ 10.10 (s, 1H), 8.21 (d, *J* = 8.2 Hz, 2H), 7.96 (d, *J* = 8.4 Hz, 2H), 4.64 (d, *J* = 1.9 Hz, 1H), 1.96 – 1.88 (m, 1H), 1.83 – 1.75 (m, 2H), 1.70 – 1.62 (m, 1H), 1.58 – 1.48 (m, 1H), 1.29 – 1.21 (m, 2H), 1.19 (s, 3H), 1.11 (s, 3H), 0.84 (s, 3H).

<sup>13</sup>C NMR (125 MHz, CDCl<sub>3</sub>) δ 191.8, 166.0, 139.2, 135.8, 130.2, 129.7, 87.6, 48.8, 48.5, 41.6, 40.0, 29.9, 27.0, 26.0, 20.4, 19.6.

HRMS (ESI) calcd for C<sub>18</sub>H<sub>23</sub>O<sub>3</sub> [M+H]<sup>+</sup>: 287.1642, found: 287.1637.

### 4-Formylphenyl 4-(*N,N*-dipropylsulfamoyl)benzoate (26, PBS-22A)

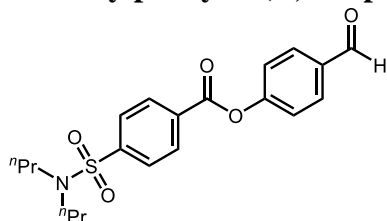

This compound was synthesized according to the following procedure.

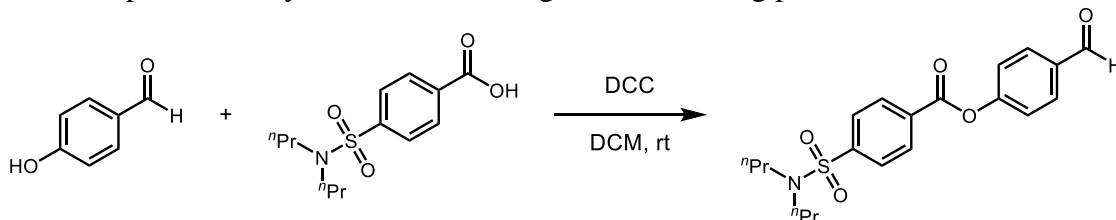

DCC (928 mg, 4.5 mmol, 1.5 equiv) was added to the solution of probenecid (856 mg, 3.0 mmol, 1.0 equiv) and 4-hydroxybenzaldehyde (440 mg, 3.6 mmol, 1.2 equiv) in 15 mL of CH<sub>2</sub>Cl<sub>2</sub>. The reaction mixture was stirred at room temperature overnight. The crude mixture was recrystallized from hot ethanol (6 mL) to obtain the pure compound as a white solid (632 mg, 54% yield).

**m.p.** = 83 – 84 °C.

**<sup>1</sup>H NMR** (500 MHz, CDCl<sub>3</sub>) δ 10.04 (s, 1H), 8.33 (d, *J* = 8.5 Hz, 2H), 8.03 – 7.93 (m, 4H), 7.43 (d, *J* = 8.5 Hz, 2H), 3.20 – 3.09 (m, 4H), 1.63 – 1.52 (m, 4H), 0.89 (t, *J* = 7.4 Hz, 6H).

**<sup>13</sup>C NMR** (125 MHz, CDCl<sub>3</sub>) δ 190.9, 163.4, 155.4, 145.5, 134.5, 132.3, 131.5, 131.0, 127.4, 122.5, 50.1, 22.1, 11.3.

**HRMS** (ESI) calcd for C<sub>20</sub>H<sub>24</sub>O<sub>5</sub>NS [M+H]<sup>+</sup>: 390.1370, found: 390.1370.

**2,6-Dibromo-4-(2-ethylbenzofuran-3-carbonyl)phenyl 4-formylbenzoate (27, wrh-04-165A)**

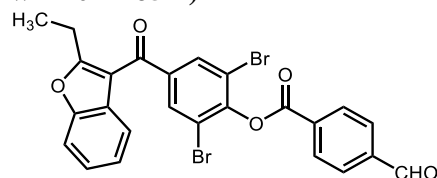

This compound was prepared from benzbromarone (1.27 g, 3.0 mmol) according to general procedure B1. The compound was obtained as a white solid (1.51 g, 90% yield, eluent: 30:1 → 20:1 hexanes/EtOAc).

**m.p.** = 128 – 129 °C.

**<sup>1</sup>H NMR** (400 MHz, CDCl<sub>3</sub>) δ 10.18 (s, 1H), 8.44 (d, *J* = 8.1 Hz, 2H), 8.13 – 8.03 (m, 4H), 7.52 (d, *J* = 8.0 Hz, 1H), 7.44 (d, *J* = 7.7 Hz, 1H), 7.37 – 7.22 (m, 2H), 2.95 (q, *J* = 7.5 Hz, 2H), 1.39 (t, *J* = 7.5 Hz, 3H).

**<sup>13</sup>C NMR** (100 MHz, CDCl<sub>3</sub>) δ 191.5, 187.9, 167.6, 161.9, 153.9, 149.5, 140.2, 139.4, 133.3, 133.0, 131.3, 130.0, 126.4, 125.0, 124.2, 121.2, 118.3, 115.4, 111.4, 22.3, 12.4.

**HRMS** (ESI) calcd for C<sub>25</sub>H<sub>17</sub>O<sub>5</sub>Br<sub>2</sub> [M+H]<sup>+</sup>: 554.9437, found: 554.9432.

**4-Formylphenyl 2-((3-(trifluoromethyl)phenyl)amino)benzoate (28, wrh-05-8)**

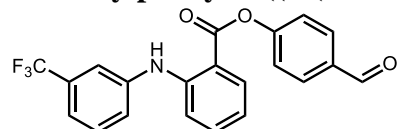

This compound was synthesized according to the following procedure.

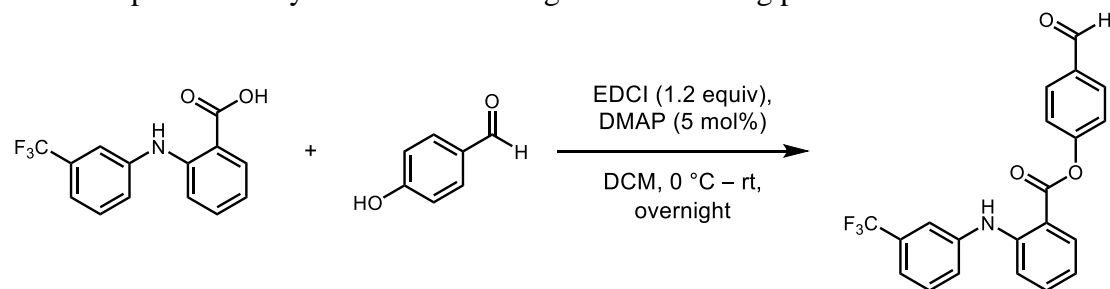

Flufenamic acid (844 mg, 3.0 mmol, 1.0 equiv), 4-hydroxybenzaldehyde (366 mg, 3 mmol, 1.0 equiv) and DMAP (18 mg, 5 mol %) were dissolved in CH<sub>2</sub>Cl<sub>2</sub> (15 mL), the resulting solution was cooled in ice bath. EDCI (690 mg, 3.6 mmol, 1.2 equiv) was added to the solution at 0 °C. The mixture was allowed to warm up to room temperature and stirred overnight. After completion, the mixture was washed with water (3 × 10 mL). The organic layer was dried over magnesium sulfate and the solvent was removed under reduced pressure. Purification by column chromatography afforded the product as a yellow solid (1.11 g, 96% yield, eluent: 5:1 hexanes/EtOAc).

**m.p.** = 75 – 76 °C.

**<sup>1</sup>H NMR** (400 MHz, CDCl<sub>3</sub>) δ 10.04 (s, 1H), 9.45 (s, 1H), 8.23 (dd, *J* = 8.1, 1.5 Hz, 1H), 8.03 – 7.96 (m, 2H), 7.53 – 7.38 (m, 6H), 7.33 (t, *J* = 8.2 Hz, 2H), 6.95 – 6.87 (m, 1H).

$^{13}\text{C}$  NMR (100 MHz,  $\text{CDCl}_3$ )  $\delta$  191.0, 166.6, 155.5, 148.1, 141.1, 135.7, 134.3, 132.3, 132.1 (q,  $J = 32.3$  Hz), 131.4, 130.2, 125.3, 124.0 (q,  $J = 271$  Hz), 122.9, 120.4 (q,  $J = 3.9$  Hz), 118.7 (q,  $J = 3.8$  Hz), 118.5, 114.4, 111.1.

$^{19}\text{F}$  NMR (376 MHz,  $\text{CDCl}_3$ )  $\delta$  -62.81.

HRMS (ESI) calcd for  $\text{C}_{21}\text{H}_{15}\text{O}_3\text{NF}_3$   $[\text{M}+\text{H}]^+$ : 386.0998, found: 386.1024.

**4-((3*S*,4*R*)-3-((Benzo[*d*][1,3]dioxol-5-yloxy)methyl)-4-(4-fluorophenyl)piperidine-1-carbonyl)benzaldehyde (29, wrh-04-177)**

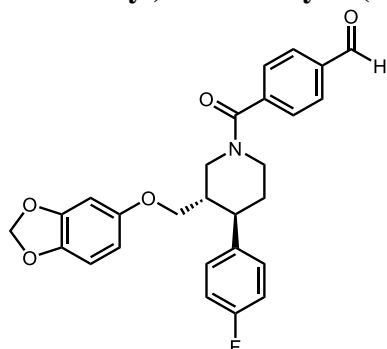

This compound was prepared from paroxetine (494 mg, 1.5 mmol) according to general procedure B1. The compound was obtained as a white solid (607 mg, 88% yield, eluent: 30:1  $\rightarrow$  20:1  $\text{CH}_2\text{Cl}_2/\text{EtOAc}$ ).

**m.p.** = 138 – 139  $^\circ\text{C}$ .

$^1\text{H}$  NMR (500 MHz,  $\text{CDCl}_3$ , rotamers observed)  $\delta$  10.06 (s, 1H), 7.95 (s, 2H), 7.61 (s, 2H), 7.23 – 7.10 (m, 2H), 7.00 (s, 2H), 6.69 – 6.53 (m, 1H), 6.39 (s, 0.5H), 6.23 – 6.15 (m, 0.5H), 6.12 (s, 0.5H), 5.96 (d,  $J = 5.8$  Hz, 0.5H), 5.88 (s, 2H), 4.96 (dd,  $J = 69.3, 9.9$  Hz, 1H), 3.98 (d,  $J = 12.1$  Hz, 0.5H), 3.78 (d,  $J = 9.8$  Hz, 0.5H), 3.74 – 3.64 (m, 0.5H), 3.60 – 3.45 (m, 1H), 3.45 – 3.33 (m, 0.5H), 3.29 – 3.05 (m, 1H), 3.04 – 2.84 (m, 1.5H), 2.84 – 2.71 (m, 0.5H), 2.25 – 1.59 (m, 3H).

$^{13}\text{C}$  NMR (100 MHz,  $\text{CDCl}_3$ )  $\delta$  191.6, 169.1, 163.0, 160.6, 154.3, 153.6, 148.3, 141.9, 138.3, 137.0, 130.0, 128.9, 127.7, 115.9, 115.7, 108.0, 105.7, 105.4, 101.3, 100.1, 98.1, 97.9, 68.6, 68.2, 51.0, 48.2, 45.6, 44.4, 43.9, 42.9, 42.0, 34.7, 33.6. (Spectrum is obscured by rotamers and C-F coupling peaks.)

$^{19}\text{F}$  NMR (470 MHz,  $\text{CDCl}_3$ , rotamers observed)  $\delta$  -115.5, -115.6.

HRMS (ESI) calcd for  $\text{C}_{27}\text{H}_{25}\text{O}_5\text{NF}$   $[\text{M}+\text{H}]^+$ : 462.1711, found: 462.1694.

**Methyl 4-(diethoxymethyl)benzoate (36, wrh-05-120B)**

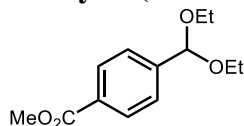

This compound was synthesized according to literature procedure.<sup>31</sup>

To a flame-dried 10 mL round bottom flask was added methyl 4-formylbenzoate (821 mg, 5.0 mmol, 1.0 equiv),  $\text{Cu}(\text{BF}_4)_2 \cdot x\text{H}_2\text{O}$  (17 mg) and triethyl orthoformate (1.7 mL, 10 mmol, 2.0 equiv). After stirring at room temperature for 1 h, the mixture was quenched with saturated  $\text{NaHCO}_3$  solution (2 mL) and extracted with  $\text{EtOAc}$  (1  $\times$  5 mL). The organic layer was dried over magnesium sulfate, concentrated *in vacuo* and purified through a basified silica gel column (40:1:0.8 hexanes/ $\text{EtOAc}/\text{Et}_3\text{N}$ ).

$^1\text{H}$  NMR (300 MHz,  $\text{CDCl}_3$ )  $\delta$  8.03 (d,  $J = 8.4$  Hz, 2H), 7.55 (d,  $J = 8.2$  Hz, 2H), 5.54 (s, 1H), 3.91 (s, 3H), 3.68 – 3.47 (m, 4H), 1.23 (t,  $J = 6.9$  Hz, 6H).

$^1\text{H}$  NMR data were in agreement with the literature.<sup>32</sup>

**(1*S*,2*S*)-1-(4-Bromophenyl)-7-(4-(4,4,5,5-tetramethyl-1,3,2-dioxaborolan-2-yl)phenoxy)-2-vinylheptan-1-ol (f, paul-1-69)**

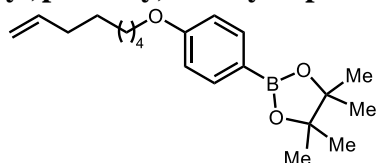

This compound was synthesized according to following procedure.

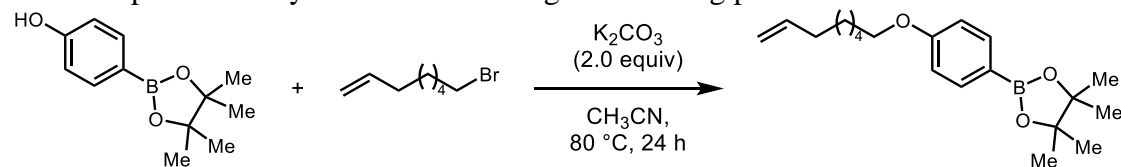

To a suspension of 4-hydroxyphenylboronic acid pinacol ester (1.10 g, 5.0 mmol, 1.0 equiv) and potassium carbonate (1.38 g, 10 mmol, 2.0 equiv) in acetonitrile (25 mL) was added 8-bromooct-1-ene (0.92 mL, 5.5 mmol, 1.1 equiv) at room temperature. The resulting mixture was stirred at 80 °C for 24 h. After completion, the mixture was quenched with water (10 mL) and extracted with ethyl acetate (3 × 20 mL). The combined organic layers were washed with brine, dried over magnesium sulfate and concentrated under reduced pressure. The crude residue was purified by column chromatography to afford the product as a colorless oil. (1.02 g, 62% yield, eluent: 60:1 hexanes/EtOAc).

<sup>1</sup>H NMR (500 MHz, CDCl<sub>3</sub>) δ 7.83 – 7.69 (m, 2H), 6.97 – 6.79 (m, 2H), 5.82 (ddt, *J* = 16.9, 10.0, 6.5 Hz, 1H), 5.05 – 4.90 (m, 2H), 3.98 (t, *J* = 6.5 Hz, 2H), 2.12 – 2.00 (m, 2H), 1.84 – 1.72 (m, 2H), 1.52 – 1.36 (m, 6H), 1.33 (s, 12H).

<sup>13</sup>C NMR (125 MHz, CDCl<sub>3</sub>) δ 161.7, 139.0, 136.5, 114.3, 113.8, 83.5, 67.7, 33.7, 29.1, 28.82, 28.80, 25.9, 24.8.

HRMS (ESI) calcd for C<sub>20</sub>H<sub>32</sub>O<sub>3</sub>B [M+H]<sup>+</sup>: 331.2439, found: 331.2441.

**4-Methyl-*N*-(oct-7-en-1-yl)-*N*-(3-phenylprop-2-yn-1-yl)benzenesulfonamide (i)**

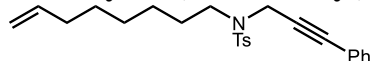

This compound was synthesized according to following procedure.

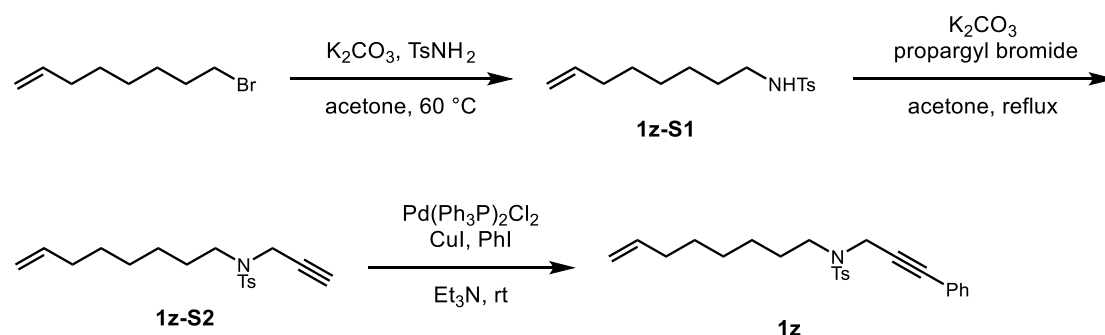

To the suspension of *p*-toluenesulfonamide (3.76 g, 22 mmol, 1.1 equiv) and potassium carbonate (5.56 g, 40 mmol, 2.0 equiv) in acetone (20 mL) was added 8-bromooct-1-ene (3.3 mL, 20 mmol, 1.0 equiv) at room temperature. The reaction mixture was stirred at 60 °C for 24 h. After completion, the reaction mixture was quenched with water (10 mL) and extracted with ethyl acetate (3 × 20 mL). The organic layer was washed with brine, dried over magnesium sulfate, and concentrated under reduced pressure. The crude residue was purified through a silica gel column to give compound **1z-S1** (4.43 g, 79% yield, eluent: 15:1) as a colorless oil.

To the suspension of compound **1z-S1** (1.40 g, 5.0 mmol, 1.0 equiv), potassium carbonate (1.38 g, 10 mmol, 2.0 equiv) in acetone (10 mL) was added propargyl bromide (0.45 mL, 6.0 mmol, 1.2 equiv) at room temperature. The reaction mixture was stirred at reflux for 24 h. After completion, the reaction mixture was quenched with water (5 mL) and extracted with ethyl acetate (3 × 10 mL). The organic layers were washed with brine, dried over magnesium sulfate and concentrated under reduced pressure. The crude residue was purified through a silica gel column to give compound **1z-S2** (1.49 g, 94% yield, eluent: 30:1) as a colorless oil.

**<sup>1</sup>H NMR** (500 MHz, CDCl<sub>3</sub>) δ 7.75 – 7.69 (m, 2H), 7.28 (d, *J* = 8.0 Hz, 2H), 5.80 (ddt, *J* = 17.0, 10.0, 6.5 Hz, 1H), 5.03 – 4.89 (m, 2H), 4.13 (d, *J* = 2.5 Hz, 2H), 3.21 – 3.14 (m, 2H), 2.42 (s, 3H), 2.06 – 2.01 (m, 2H), 2.00 (t, *J* = 2.5 Hz, 1H), 1.61 – 1.50 (m, 2H), 1.42 – 1.28 (m, 6H).

To a 25 mL round bottom flask equipped with a magnetic stirrer bar were added compound **1z-S2** (1.49 g, 4.7 mmol, 1.0 equiv), Pd(Ph<sub>3</sub>P)<sub>2</sub>Cl<sub>2</sub> (33 mg, 1 mol %), CuI (18 mg, 2 mol %), Et<sub>3</sub>N (9 mL) and iodobenzene (0.57 mL, 5.2 mmol, 1.1 equiv). The reaction mixture was stirred at room temperature under nitrogen for 24 h. After completion, the reaction mixture was quenched with water (5 mL) and extracted with ethyl acetate (3 × 10 mL). The organic layers were washed with brine, dried over magnesium sulfate and concentrated under reduced pressure. The crude residue was purified through a silica gel column to give product **1z** (1.83 g, 99% yield, eluent: 30:1) as a pale yellow oil.

**<sup>1</sup>H NMR** (500 MHz, CDCl<sub>3</sub>) δ 7.71 – 7.66 (m, 2H), 7.23 – 7.12 (m, 5H), 7.01 – 6.96 (m, 2H), 5.72 (ddt, *J* = 17.0, 10.0, 6.5 Hz, 1H), 4.95 – 4.83 (m, 2H), 4.26 (s, 2H), 3.17 (t, *J* = 7.5 Hz, 2H), 2.26 (s, 3H), 2.01 – 1.92 (m, 2H), 1.59 – 1.49 (m, 2H), 1.36 – 1.21 (m, 6H).

**<sup>13</sup>C NMR** (125 MHz, CDCl<sub>3</sub>) δ 143.4, 139.1, 136.1, 131.6, 129.6, 128.5, 128.3, 127.9, 122.4, 114.4, 85.6, 82.0, 46.5, 37.1, 33.8, 28.9, 28.8, 27.6, 26.6, 21.5.

**HRMS** (ESI) calcd for C<sub>24</sub>H<sub>30</sub>O<sub>2</sub>NS [M+H]<sup>+</sup>: 396.1992, found: 396.1982.

### 2-(Oct-7-en-1-yl)isoindoline-1,3-dione (j)

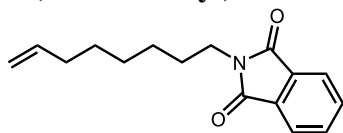

This compound was synthesized according to literature procedure.<sup>33</sup>

### 2-(Pent-4-en-1-yl)isoindoline-1,3-dione (k)

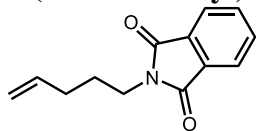

This compound was synthesized according to literature procedure.<sup>33</sup>

### *N,N*-Dimethyloct-7-en-1-amine (l, CZZ-83)

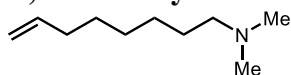

This compound was prepared from dimethylamine according to general procedure B2. The compound was obtained as a brown liquid (1.08 g, 70% yield, eluent: 40:1:4 DCM/MeOH/Et<sub>3</sub>N).

**<sup>1</sup>H NMR** (300 MHz, CDCl<sub>3</sub>) δ 5.80 (ddt, *J* = 16.9, 10.2, 6.7 Hz, 1H), 5.04 – 4.85 (m, 2H), 2.27 – 2.16 (m, 8H), 2.03 (q, *J* = 6.6 Hz, 2H), 1.50 – 1.22 (m, 8H).

$^{13}\text{C}$  NMR (75 MHz,  $\text{CDCl}_3$ )  $\delta$  139.3, 114.3, 60.1, 45.7, 33.9, 29.2, 29.0, 27.9, 27.5.  
HRMS (ESI) calcd for  $\text{C}_{10}\text{H}_{22}\text{N}$   $[\text{M}+\text{H}]^+$ : 156.1747, found: 156.1746.

***N,N*-Dibenzyl-oct-7-en-1-amine (m, wrh-06-39-2)**

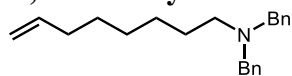

This compound was prepared from dibenzylamine according to general procedure B2. The compound was obtained as a yellow liquid (2.12 g, 69% yield, eluent: 100:1 hexanes/EtOAc).

$^1\text{H}$  NMR (500 MHz,  $\text{CDCl}_3$ )  $\delta$  7.42 – 7.35 (m, 4H), 7.35 – 7.29 (m, 4H), 7.27 – 7.21 (m, 2H), 5.81 (ddt,  $J = 16.9, 10.2, 6.7$  Hz, 1H), 5.04 – 4.91 (m, 2H), 3.56 (s, 4H), 2.45 – 2.38 (m, 2H), 2.02 (dd,  $J = 14.6, 7.0$  Hz, 2H), 1.56 – 1.49 (m, 2H), 1.41 – 1.32 (m, 2H), 1.32 – 1.19 (m, 4H).

$^{13}\text{C}$  NMR (125 MHz,  $\text{CDCl}_3$ )  $\delta$  140.2, 139.3, 128.9, 128.2, 126.8, 114.3, 58.4, 53.5, 33.9, 29.1, 29.1, 27.2, 27.1.

HRMS (ESI) calcd for  $\text{C}_{22}\text{H}_{30}\text{N}$   $[\text{M}+\text{H}]^+$ : 308.2373, found: 308.2379.

**1-(Oct-7-en-1-yl)piperidine (n, wrh-06-39-1)**

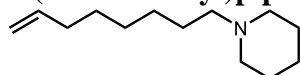

This compound was prepared from piperidine according to general procedure B2. The compound was obtained as a yellow liquid (1.73 g, 89% yield, eluent: 1:1:0.01 hexanes/EtOAc/ $\text{Et}_3\text{N}$ ).

$^1\text{H}$  NMR (400 MHz,  $\text{CDCl}_3$ )  $\delta$  5.80 (ddt,  $J = 16.9, 10.2, 6.7$  Hz, 1H), 4.95 (ddd,  $J = 13.6, 11.1, 1.3$  Hz, 2H), 2.46 – 2.29 (m, 4H), 2.29 – 2.21 (m, 2H), 2.03 (q,  $J = 7.0$  Hz, 2H), 1.63 – 1.53 (m, 4H), 1.52 – 1.18 (m, 10H).

$^{13}\text{C}$  NMR (125 MHz,  $\text{CDCl}_3$ )  $\delta$  139.3, 114.3, 59.8, 54.8, 33.9, 29.2, 29.0, 27.8, 27.1, 26.2, 24.7.

HRMS (ESI) calcd for  $\text{C}_{13}\text{H}_{26}\text{N}$   $[\text{M}+\text{H}]^+$ : 196.2060, found: 196.2061.

***N*-(3-(10,11-Dihydro-5*H*-dibenzo[*a,d*][7]annulen-5-ylidene)propyl)-*N*-methyloct-7-en-1-amine (o, wrh-06-49)**

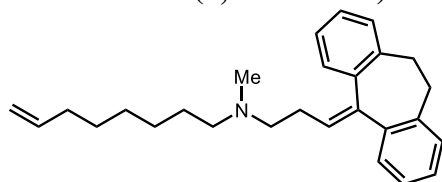

This compound was synthesized according to following procedure.

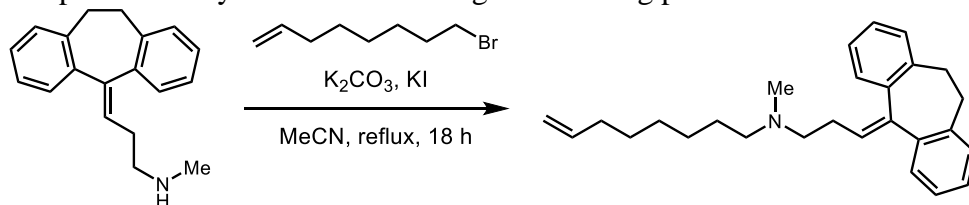

A 50 mL round bottom flask was charged with nortriptyline (1.32 g, 5.0 mmol, 1.0 equiv), 8-bromo-1-octene (0.84 mL, 5.0 mmol, 1.0 equiv),  $\text{K}_2\text{CO}_3$  (898 mg, 6.5 mmol, 1.3 equiv), KI (83 mg, 0.5 mmol, 10 mol %) and acetonitrile (10 mL). The reaction mixture was heated to reflux for 18 h. After completion, the mixture was cooled to room temperature and filtered through a pad of Celite to remove the insoluble solid materials. The crude residue was purified through a silica gel column to give product



**o** (1.31 g, 70% yield, eluent: 10:1 → 2:1 hexanes/EtOAc with 1% Et<sub>3</sub>N) as a yellow oil.

<sup>1</sup>H NMR (400 MHz, CDCl<sub>3</sub>) δ 7.30 – 7.24 (m, 1H), 7.22 – 7.08 (m, 6H), 7.05 – 6.99 (m, 1H), 5.89 – 5.73 (m, 2H), 5.04 – 4.88 (m, 2H), 3.51 – 3.20 (m, 2H), 3.08 – 2.86 (m, 1H), 2.86 – 2.66 (m, 1H), 2.48 – 2.37 (m, 2H), 2.33 – 2.18 (m, 4H), 2.14 (s, 3H), 2.08 – 1.98 (m, 2H), 1.51 – 1.17 (m, 8H).

<sup>13</sup>C NMR (100 MHz, CDCl<sub>3</sub>) δ 143.5, 141.5, 140.3, 139.4, 139.3, 137.2, 130.1, 129.8, 128.7, 128.4, 128.1, 127.5, 127.1, 126.1, 125.8, 114.3, 57.7, 57.5, 42.3, 33.93, 33.89, 32.2, 29.2, 29.0, 27.5, 27.44, 27.37.

HRMS (ESI) calcd for C<sub>27</sub>H<sub>36</sub>N [M+H]<sup>+</sup>: 374.2842, found: 374.2849.

### 6,7-Dihydro-5H-benzo[7]annulene (**q**)

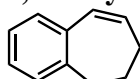

This compound was synthesized according to literature procedure.<sup>34</sup>

### 6-Bromo-1,2-dihydronaphthalene (**r**)

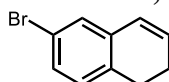

This compound was synthesized from 7-bromotetral-1-one according to literature procedure.<sup>34</sup>

### 8-Methoxy-1,2-dihydronaphthalene (**s**)

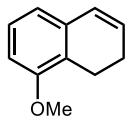

This compound was synthesized from 5-methoxy-1-tetralone according to literature procedure.<sup>34</sup>

### Dec-1-ene-3,3-d<sub>2</sub> (**u-d<sub>2</sub>**, **CZZ-63**)

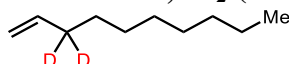

This compound was synthesized according to the following procedure.

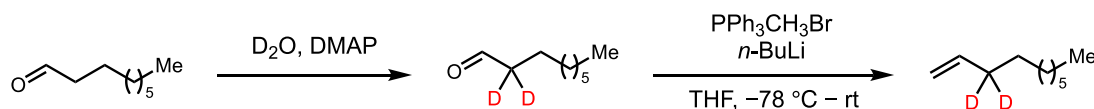

A 25 mL round bottom flask was charged with nonanal (8.6 mL, 50 mmol, 1.0 equiv), DMAP (611 mg, 5 mmol, 0.1 equiv) and D<sub>2</sub>O (12.6 mL, 695 mmol, 14 equiv). The mixture was stirred at 100 °C for 2 h. After cooling to room temperature, the mixture was diluted with CH<sub>2</sub>Cl<sub>2</sub> (20 mL). The layers were separated and the organic layer was washed with 1 N HCl (2 × 10 mL), dried over magnesium sulfate and concentrated under reduced pressure at 0 °C. The residue was subjected to the same reaction conditions again to afford nonanal-*d*<sub>2</sub> with >95% D incorporation. The product was used in the next step without further purification.

*n*-BuLi (8.8 mL, 22 mmol, 1.1 equiv, 2.5 M in hexanes) was added dropwise over 5 min to the solution of PPh<sub>3</sub>CH<sub>3</sub>Br (8.57 g, 24 mmol, 1.2 equiv) in dry THF (80 mL). The mixture was stirred at -78 °C under nitrogen for 20 min, and was warmed up to room temperature and stirred for another 30 min. Then the mixture was cooled back to -78 °C, nonanal-*d*<sub>2</sub> (2.88 g, 20 mmol, 1.0 equiv) was added dropwise over 5 min.

The resulting mixture was allowed to gradually warm up to room temperature and was stirred overnight. After completion, the solid material was filtered out through celite and the filtrate was concentrated *in vacuo*. The crude residue was purified by column chromatography on silica gel to afford the desired product 1-decene-*d*<sub>2</sub> as a colorless liquid (846 mg, 30% yield, eluent: hexanes) with 97% D incorporation. (See <sup>1</sup>H NMR)

<sup>1</sup>H NMR data were in agreement with the literature.<sup>35</sup>

## X-ray structure of complex $\text{Fp}^{\text{W3}}\text{I}$ and product 5k

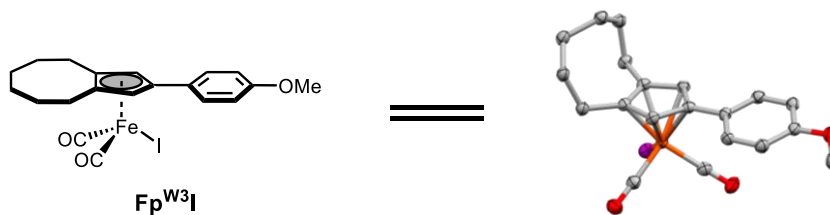

### Datablock: Ruihan2\_0ma\_a

Bond precision: C-C = 0.0030 Å      Wavelength=1.54178  
Cell: a=11.6149(4)      b=11.0189(3)      c=29.5374(9)  
          alpha=90      beta=90      gamma=90  
Temperature: 100 K

|                        | Calculated      | Reported        |
|------------------------|-----------------|-----------------|
| Volume                 | 3780.3(2)       | 3780.3(2)       |
| Space group            | P b c a         | P b c a         |
| Hall group             | -P 2ac 2ab      | -P 2ac 2ab      |
| Moiety formula         | C20 H21 Fe I O3 | ?               |
| Sum formula            | C20 H21 Fe I O3 | C20 H21 Fe I O3 |
| Mr                     | 492.12          | 492.12          |
| Dx, g cm <sup>-3</sup> | 1.729           | 1.729           |
| Z                      | 8               | 8               |
| Mu (mm <sup>-1</sup> ) | 19.347          | 19.347          |
| F000                   | 1952.0          | 1952.0          |
| F000'                  | 1945.93         |                 |
| h, k, lmax             | 14, 13, 36      | 14, 13, 36      |
| Nref                   | 3731            | 3723            |
| Tmin, Tmax             | 0.147, 0.908    | 0.170, 0.450    |
| Tmin'                  | 0.025           |                 |

Correction method= # Reported T Limits: Tmin=0.170 Tmax=0.450  
AbsCorr = MULTI-SCAN

Data completeness= 0.998      Theta(max)= 72.162

R(reflections)= 0.0270( 3532)      wR2(reflections)=  
S = 0.980      Npar= 310      0.0783( 3723)

Deposit number: CCDC 2220935.

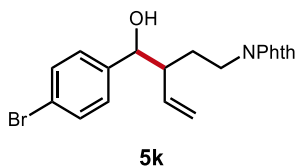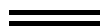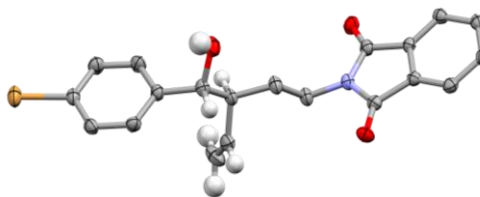

## Datablock: wyd61474\_0m\_a

Bond precision: C-C = 0.0030 Å

Wavelength=1.54178

Cell: a=27.947 (3)

b=7.9597 (7)

c=17.2671 (14)

alpha=90

beta=112.486 (5)

gamma=90

Temperature: 150 K

|                        | Calculated                                          | Reported                                            |
|------------------------|-----------------------------------------------------|-----------------------------------------------------|
| Volume                 | 3549.0 (6)                                          | 3549.0 (5)                                          |
| Space group            | C 2/c                                               | C 2/c                                               |
| Hall group             | -C 2yc                                              | -C 2yc                                              |
| Moiety formula         | C <sub>20</sub> H <sub>18</sub> Br N O <sub>3</sub> | ?                                                   |
| Sum formula            | C <sub>20</sub> H <sub>18</sub> Br N O <sub>3</sub> | C <sub>20</sub> H <sub>18</sub> Br N O <sub>3</sub> |
| Mr                     | 400.25                                              | 400.26                                              |
| Dx, g cm <sup>-3</sup> | 1.498                                               | 1.498                                               |
| Z                      | 8                                                   | 8                                                   |
| Mu (mm <sup>-1</sup> ) | 3.312                                               | 3.312                                               |
| F <sub>000</sub>       | 1632.0                                              | 1632.0                                              |
| F <sub>000</sub> '     | 1630.72                                             |                                                     |
| h, k, lmax             | 34, 9, 21                                           | 34, 9, 21                                           |
| Nref                   | 3388                                                | 3315                                                |
| Tmin, Tmax             | 0.652, 0.767                                        | 0.610, 0.750                                        |
| Tmin'                  | 0.561                                               |                                                     |

Correction method= # Reported T Limits: Tmin=0.610 Tmax=0.750

AbsCorr = MULTI-SCAN

Data completeness= 0.978

Theta(max)= 70.387

R(reflections)= 0.0309 ( 2958)

wR2(reflections)=  
0.1027 ( 3315)

S = 1.176

Npar= 226

## Pressure vessels and gas introducing procedure

The pressure vessels for propylene functionalization reactions were purchased from ACE glass company. The product (part # 8648-61) includes a pressure tube and a PTFE bushing with plunger valve that allows purging of the tube. The loosed bottom plunger has a hole inside, that when positioned in relation to O-Ring seal, will open the tube to the atmosphere (i.e., pull to close, push to open). The plunger has step-down extension that acts as a stopper in bushing (Figure S7).

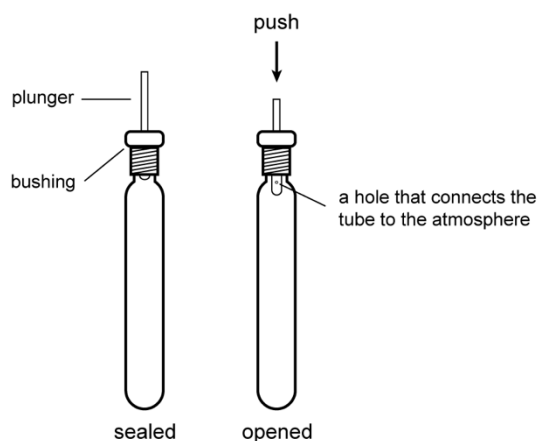

**Figure S7.** Working mode of the pressure tube.

In order to exchange the gas inside of the tube with propylene, the top of the plunger was wrapped with tapes and tightly equipped with a rubber septum. The plunger was pushed to open when the tube was placed under vacuum via a needle connected to the Schlenk line. After evacuating for 5 min, the needle was removed and propylene was immediately condensed into the tube from a plastic syringe. The plunger was pulled to close and the tube was allowed to warm to room temperature before heating up. (Figure S8)

Pressure tubes and bushings are individually fitted and should be carefully matched and tested for air-tightness before use.

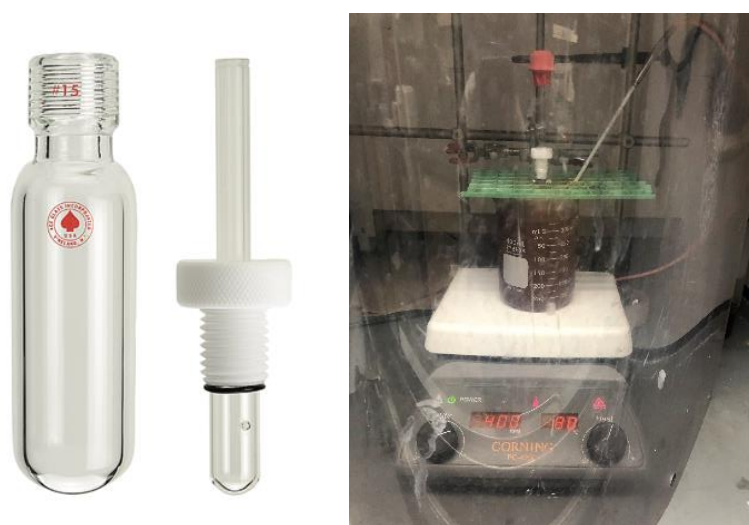

**Figure S8.** Pressure tube and reaction set-up.

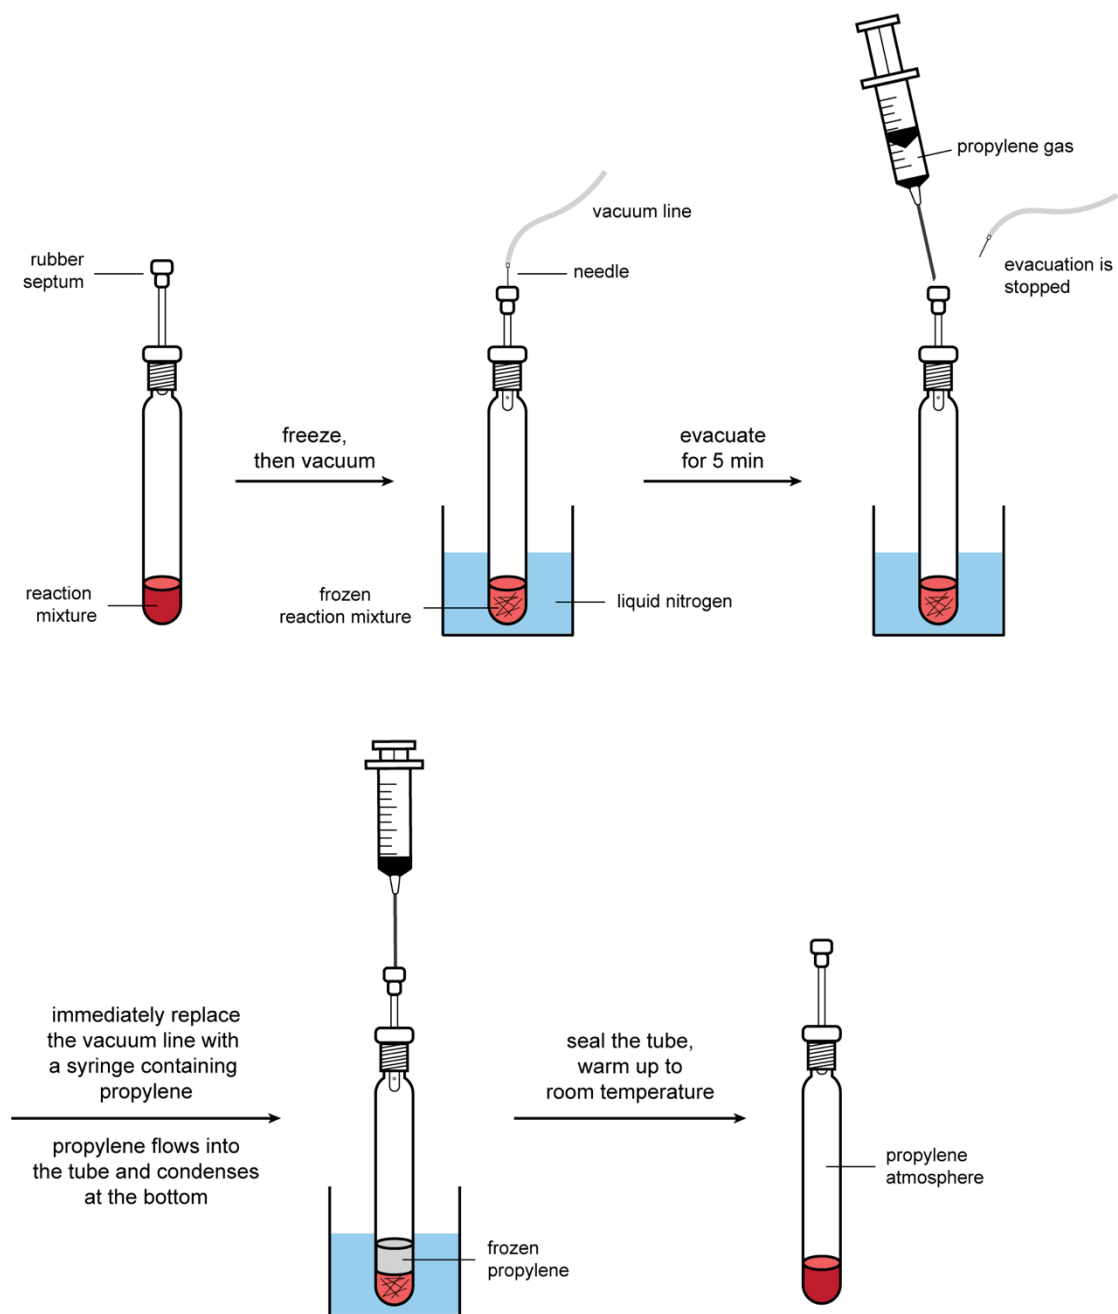

**Figure S9.** Gas introducing procedure.

## References

1. Wang, L.; Wang, L.; Li, M.; Chong, Q.; Meng, F. Cobalt-Catalyzed Diastereo- and Enantioselective Reductive Allyl Additions to Aldehydes with Allylic Alcohol Derivatives via Allyl Radical Intermediates. *J. Am. Chem. Soc.* **2021**, *143*, 12755–12765.
2. Barabé, F.; Bétournay, G.; Bellavance, G.; Barriault, L. Gold-Catalyzed Synthesis of Carbon-Bridged Medium-Sized Rings. *Org. Lett.* **2009**, *11*, 4236–4238.
3. Polo, E.; Bellabarba, R. M.; Prini, G.; Traverso, O.; Green, M. L. H. Synthesis of ring-substituted bis- $\eta^5$ -cyclopentadienyl derivatives of the Group IV elements containing the bicyclic ligands  $\eta^5$ -C<sub>5</sub>H<sub>3</sub>(1,2-CH<sub>2</sub>)<sub>n</sub>, n=4, 5, or 6. *J. Organomet. Chem.* **1999**, *577*, 211–218.
4. Shanmugam, P.; Srinivasan, R.; Rajagopalan, K. Synthesis of functionalised bicyclo[4.4.0] and spiro [5.4] compounds by tin-mediated radical cyclization. *Tetrahedron* **1997**, *53*, 11685–11692.
5. Asachenko, A. F.; Bush, A. A.; Smirnov, A. Y.; Morozov, O. S.; Dzhevakov, P. B.; Kim, S. Y.; Cho, M. S.; Lee, K. S.; Lee, Y. H.; Cho, K. J.; Lee, S. M.; Nechaev, M. S. New zirconocenes with 4,5,6,7-tetrahydroindene ligands. Synthesis and catalytic activity in the polymerization of ethylene and copolymerization of ethylene with hex-1-ene. *Russ. Chem. Bull.* **2016**, *65*, 1580–1585.
6. Akita, M.; Terada, M.; Tanaka, M.; Morooka, Y. Some additional aspects of versatile starting compounds for cationic organoiron complexes: molecular structure of the aqua complex  $[(\eta^5\text{-C}_5\text{Me}_4\text{Et})\text{Fe}(\text{CO})_2(\text{OH}_2)]\text{BF}_4$  and solution behavior of the THF complex  $[(\eta^5\text{-C}_5\text{R}_5)\text{Fe}(\text{CO})_2(\text{THF})]\text{BF}_4$ . *J. Organomet. Chem.* **1996**, *510*, 255–261.
7. Wang, Y.; Scrivener, S. G.; Zuo, X. D.; Wang, R.; Palermo, P. N.; Murphy, E.; Durham, A. C.; Wang, Y. M. Iron-Catalyzed Contrasteric Functionalization of Allenic C(sp<sup>2</sup>)-H Bonds: Synthesis of  $\alpha$ -Aminoalkyl 1,1-Disubstituted Allenes. *J. Am. Chem. Soc.* **2021**, *143*, 14998–15004.
8. Büyükdalı, N. N.; Aslan, N.; Gümüş, S.; Gümüş, A. Stereoselective synthesis of benzofuran and benzothiophene substituted dihydropyran derivatives via ring closing metathesis. *Tetrahedron: Asymmetry* **2016**, *27*, 954–959.
9. Nortcliffe, A.; Milne, G. D. S.; Hamza, D.; Moody, C. J. Synthesis of 4-aminotetrahydropyran scaffolds for drug discovery. *Bioorg. Med. Chem.* **2017**, *25*, 2218–2225.
10. Hu, X.-Q.; Chen, J.-R.; Wei, Q.; Liu, F.-L.; Deng, Q.-H.; You-Quan, Z.; Xiao, W.-J. Efficient Synthesis of Dihydropyrazoles by Halocyclization of  $\beta,\gamma$ -Unsaturated Hydrazones. *Eur. J. Org. Chem.* **2014**, *2014*, 3082–3086.
11. Zhu, S.; Buchwald, S. L. Enantioselective CuH-catalyzed anti-Markovnikov hydroamination of 1,1-disubstituted alkenes. *J. Am. Chem. Soc.* **2014**, *136*, 15913–15916.
12. Zbieg, J. R.; Fukuzumi, T.; Krische, M. J. Iridium Catalyzed Hydrohydroxyalkylation of Butadiene: Carbonyl Crotylation. *Adv. Synth. Catal.* **2010**, *352*, 2416–2420.
13. Gaussian 16, Revision C.01, Frisch, M. J.; Trucks, G. W.; Schlegel, H. B.; Scuseria, G. E.; Robb, M. A.; Cheeseman, J. R.; Scalmani, G.; Barone, V.; Petersson, G. A.; Nakatsuji, H.; Li, X.; Caricato, M.; Marenich, A. V.; Bloino, J.; Janesko, B. G.; Gomperts, R.; Mennucci, B.; Hratchian, H. P.; Ortiz, J. V.;

- Izmaylov, A. F.; Sonnenberg, J. L.; Williams-Young, D.; Ding, F.; Lipparini, F.; Egidi, F.; Goings, J.; Peng, B.; Petrone, A.; Henderson, T.; Ranasinghe, D.; Zakrzewski, V. G.; Gao, J.; Rega, N.; Zheng, G.; Liang, W.; Hada, M.; Ehara, M.; Toyota, K.; Fukuda, R.; Hasegawa, J.; Ishida, M.; Nakajima, T.; Honda, Y.; Kitao, O.; Nakai, H.; Vreven, T.; Throssell, K.; Montgomery, J. A., Jr.; Peralta, J. E.; Ogliaro, F.; Bearpark, M. J.; Heyd, J. J.; Brothers, E. N.; Kudin, K. N.; Staroverov, V. N.; Keith, T. A.; Kobayashi, R.; Normand, J.; Raghavachari, K.; Rendell, A. P.; Burant, J. C.; Iyengar, S. S.; Tomasi, J.; Cossi, M.; Millam, J. M.; Klene, M.; Adamo, C.; Cammi, R.; Ochterski, J. W.; Martin, R. L.; Morokuma, K.; Farkas, O.; Foresman, J. B.; Fox, D. J. Gaussian, Inc., Wallingford CT, **2016**.
14. Pracht, P.; Bohle, F.; Grimme, S. Automated Exploration of the Low-Energy Chemical Space with Fast Quantum Chemical Methods. *Phys. Chem. Chem. Phys.* **2020**, *22*, 7169–7192.
  15. Bannwarth, C.; Ehlert, S.; Grimme, S. GFN2-xTB—an Accurate and Broadly Parametrized Self-Consistent Tight-Binding Quantum Chemical Method with Multipole Electrostatics and Density-Dependent Dispersion Contributions. *J. Chem. Theory Comput.* **2019**, *15*, 1652–1671.
  16. (a) Lee, C.; Yang, W.; Parr, R. G. Development of the Colle-Salvetti Correlation-Energy Formula into a Functional of the Electron Density. *Phys. Rev. B* **1988**, *37*, 785–789. (b) Becke, A. D., Density-Functional Thermochemistry. III. The Role of Exact Exchange. *J. Chem. Phys.* **1993**, *98*, 5648–5652.
  17. Grimme, S.; Antony, J.; Ehrlich, S.; Krieg, H. A Consistent and Accurate Ab Initio Parametrization of Density Functional Dispersion Correction (DFT-D) for the 94 Elements H-Pu. *J. Chem. Phys.* **2010**, *132*, 154104.
  18. Grimme, S.; Ehrlich, S.; Goerigk, L. Effect of the Damping Function in Dispersion Corrected Density Functional Theory. *J. Comput. Chem.* **2011**, *32*, 1456–1465.
  19. Dolg, M.; Wedig, U.; Stoll, H.; Preuss, H. Energy-adjusted ab initio pseudopotentials for the first row transition elements. *J. Chem. Phys.* **1987**, *86*, 866–872.
  20. Zhao, Y.; Truhlar, D. G. The M06 Suite of Density Functionals for Main Group Thermochemistry, Thermochemical Kinetics, Noncovalent Interactions, Excited States, and Transition Elements: Two New Functionals and Systematic Testing of Four M06-Class Functionals and 12 Other Functionals. *Theor. Chem. Acc.* **2008**, *120*, 215–241.
  21. Marenich, A. V.; Cramer, C. J.; Truhlar, D. G. Universal Solvation Model Based on Solute Electron Density and on a Continuum Model of the Solvent Defined by the Bulk Dielectric Constant and Atomic Surface Tensions. *J. Phys. Chem. B* **2009**, *113*, 6378–6396.
  22. Guo, Y.; Riplinger, C.; Becker, U.; Liakos, D. G.; Minenkov, Y.; Cavallo, L.; Neese, F. An improved linear scaling perturbative triples correction for the domain based local pair-natural orbital based singles and doubles coupled cluster method DLPNO-CCSD(T). *J. Chem. Phys.* **2018**, *148*, 011101.
  23. Neese, F. Software update: The ORCA program system, version 5.0. *Wiley Interdiscip. Rev.: Comput. Mol. Sci.* **2022**, *12*, e1606.
  24. (a) Neese, F. An Improvement of the Resolution of the Identity Approximation for the Calculation of the Coulomb Matrix. *J. Comp. Chem.* **2003**, *24*, 1740–1747. (b) Neese, F.; Wennmohs, F.; Hansen, A.; Becker, U. Efficient, approximate and parallel Hartree-Fock and hybrid DFT calculations. A ‘chain-of-spheres’ algorithm for the Hartree-Fock exchange. *Chem. Phys.* **2009**, *356*, 98–109. (c)



- Izsak, R.; Neese, F. An overlap fitted chain of spheres exchange method. *J. Chem. Phys.* **2011**, *135*, 144105.
25. Mammen, M.; Shakhnovich, E. I.; Deutch, J. M.; Whitesides, G. M. *J. Org. Chem.* **1998**, *63*, 3821-3830.
26. Luchini, G.; Alegre-Requena, J. V.; Funes-Ardoiz, I.; Paton, R. S. F, GoodVibes: automated thermochemistry for heterogeneous computational chemistry data [version 1; peer review: 2 approved with reservations]. *F1000Research* **2020**, *9*, 291.
27. Grimme, S. Supramolecular Binding Thermodynamics by Dispersion-Corrected Density Functional Theory. *Chem. Eur. J.* **2012**, *18*, 9955–9964.
28. Legault, C. Y., CYLView 2.0. Université de Sherbrooke **2020**, <http://www.cylview.org>.
29. Crosthwaite, J. M.; Aki, S. N.; Maginn, E. J.; Brennecke, J. F. Liquid phase behavior of imidazolium-based ionic liquids with alcohols: effect of hydrogen bonding and non-polar interactions. *Fluid Phase Equilib.* **2005**, *228–229*, 303–309.
30. Li, B.; Lawrence, B.; Li, G.; Ge, H. Ligand-Controlled Direct gamma-C–H Arylation of Aldehydes. *Angew. Chem. Int. Ed.* **2020**, *59*, 3078–3082.
31. Kumar, R.; Chakraborti, A. K. Copper(II) tetrafluoroborate as a novel and highly efficient catalyst for acetal formation. *Tetrahedron Lett.* **2005**, *46*, 8319–8323.
32. Bogner, S.; van Gemmeren, M. Direct Synthesis of Unsymmetrical Dithioacetals. *Chem. Eur. J.* **2021**, *27*, 4859–4863.
33. Wang, Y.; Wang, L.; Chen, M.; Tu, Y.; Liu, Y.; Zhang, J. Palladium/Xu-Phos-catalyzed asymmetric carboamination towards isoxazolidines and pyrrolidines. *Chem. Sci.* **2021**, *12*, 8241–8245.
34. Singh, K.; Fennell, C. J.; Coutsiias, E. A.; Latifi, R.; Hartson, S.; Weaver, J. D. Light Harvesting for Rapid and Selective Reactions: Click Chemistry with Strain-Loadable Alkenes. *Chem* **2018**, *4*, 124–137.
35. Ma, R.; White, M. C. C–H to C–N Cross-Coupling of Sulfonamides with Olefins. *J. Am. Chem. Soc.* **2018**, *140*, 3202–3205.

# NMR spectra

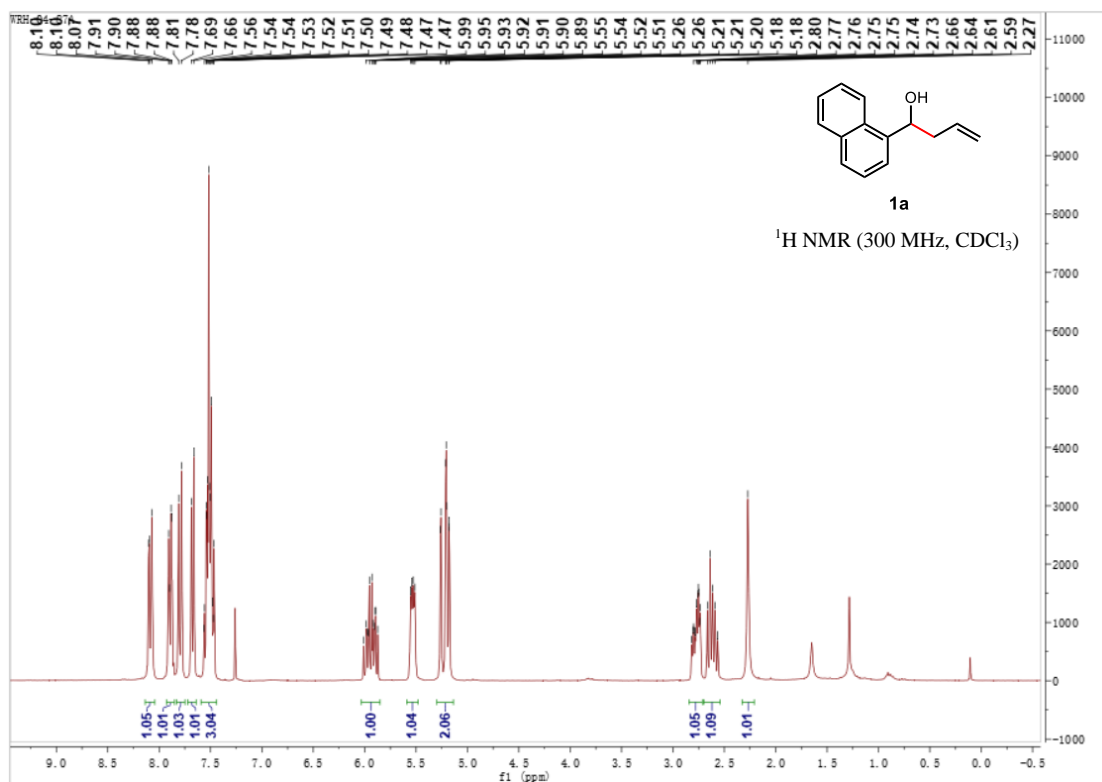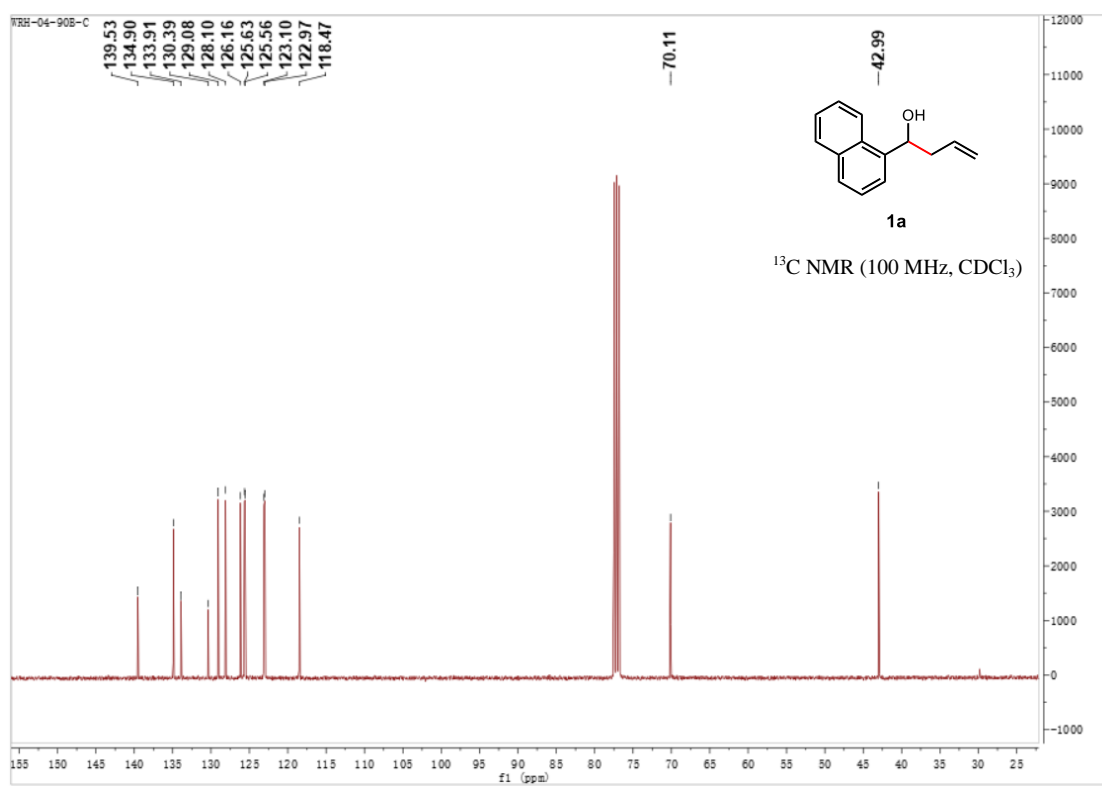

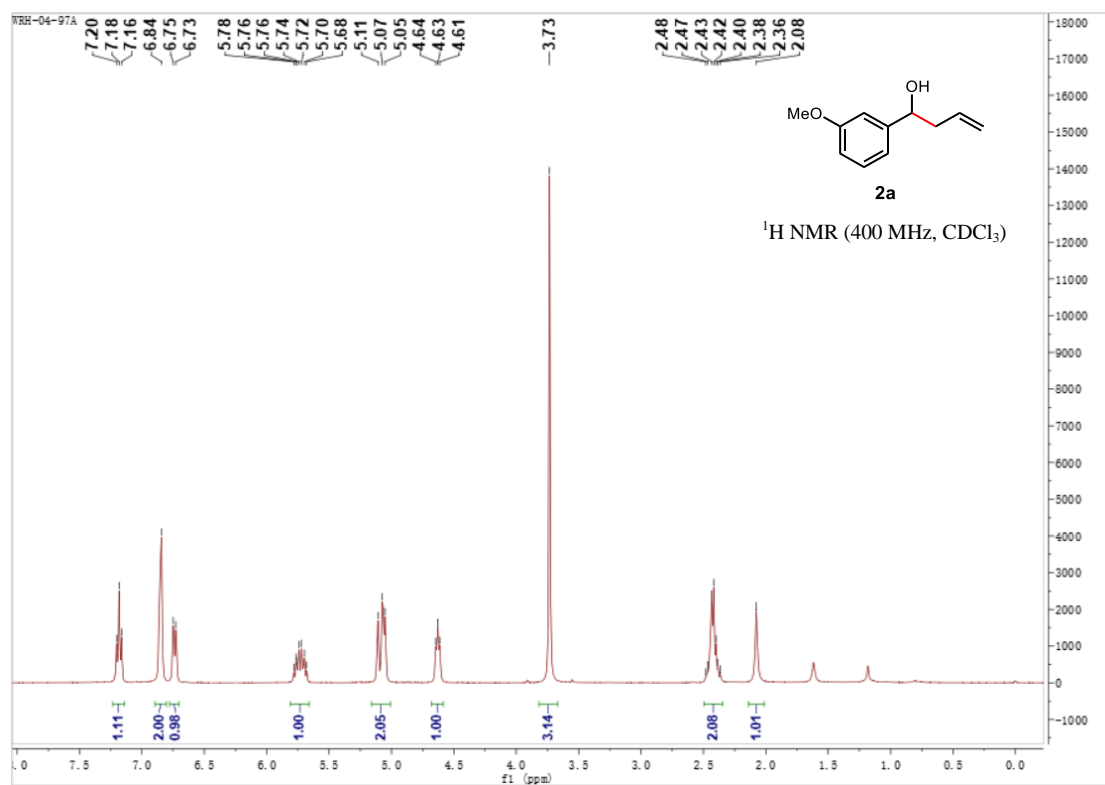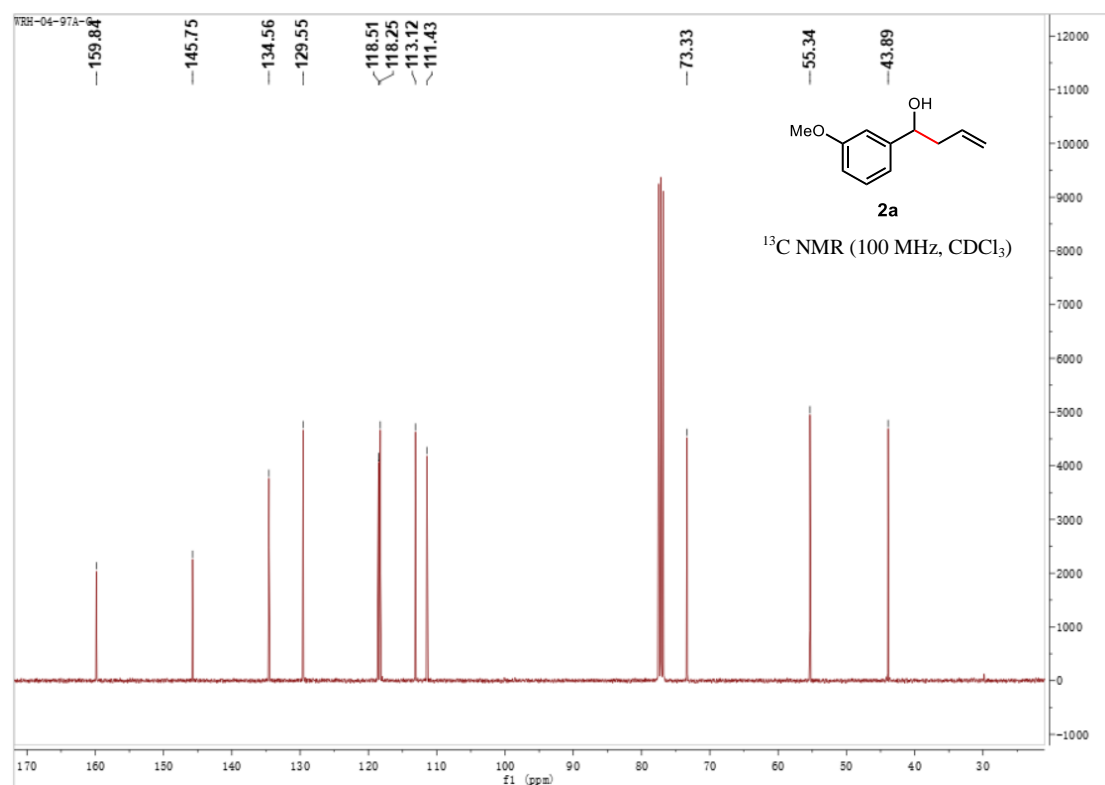

WRH-04-163A

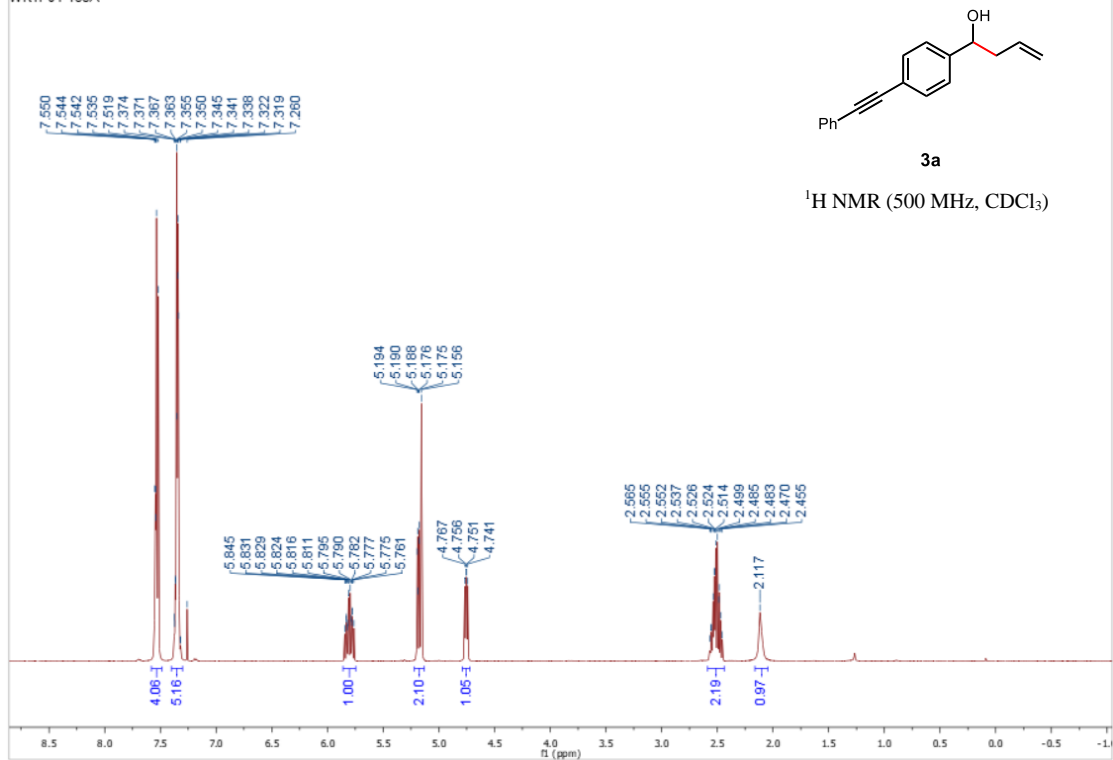

WRH-04-163A-C

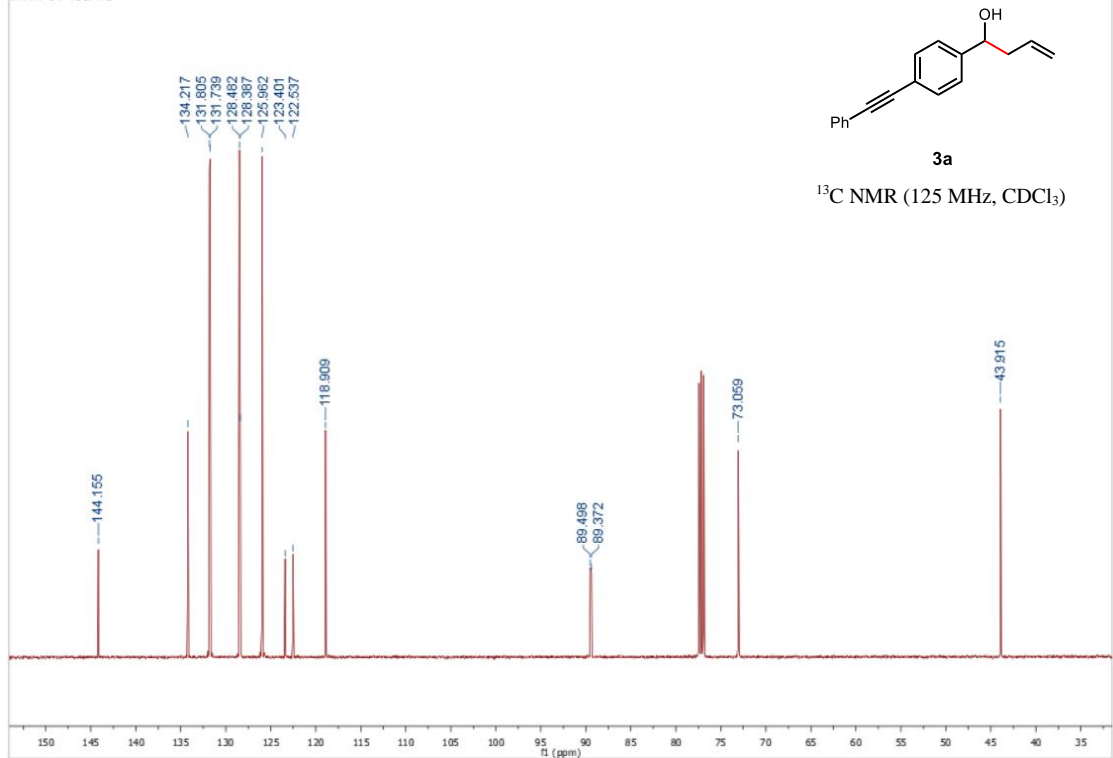

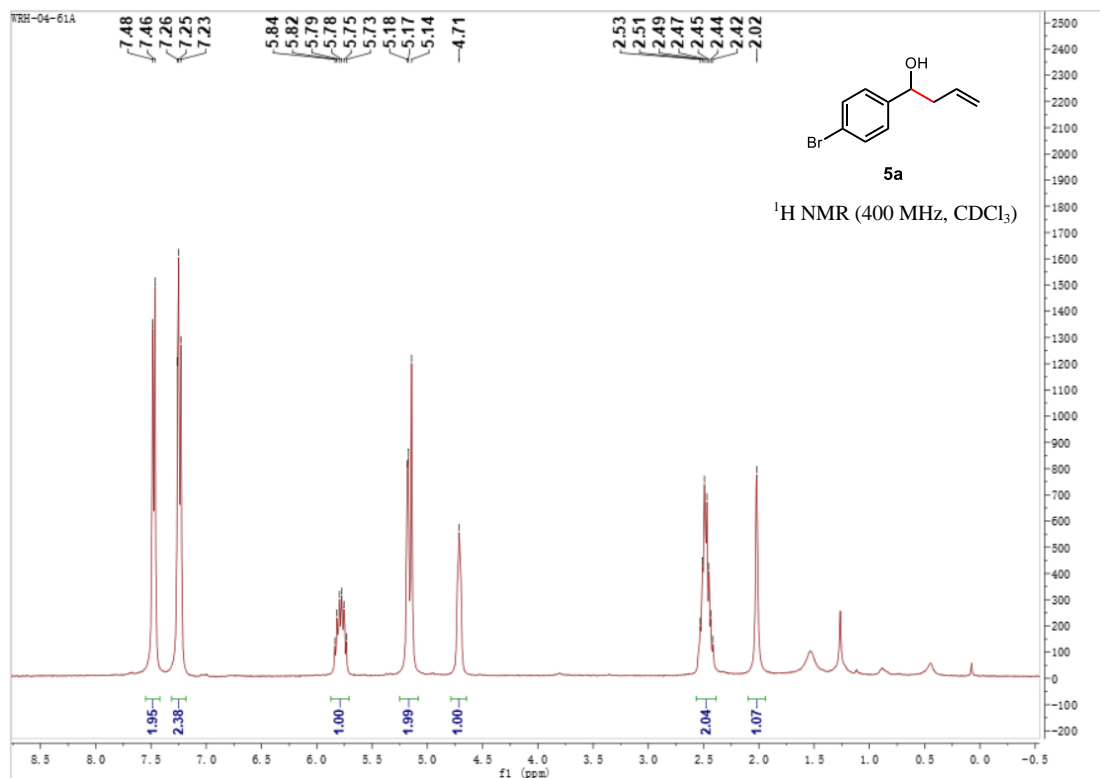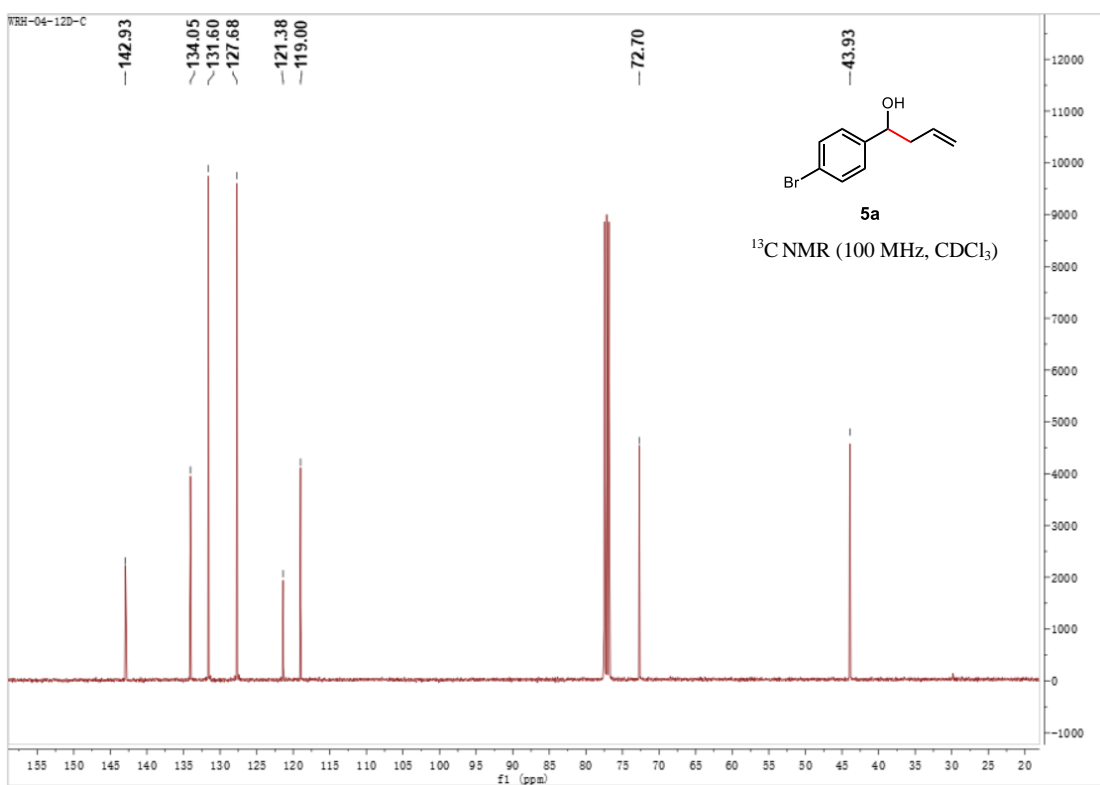

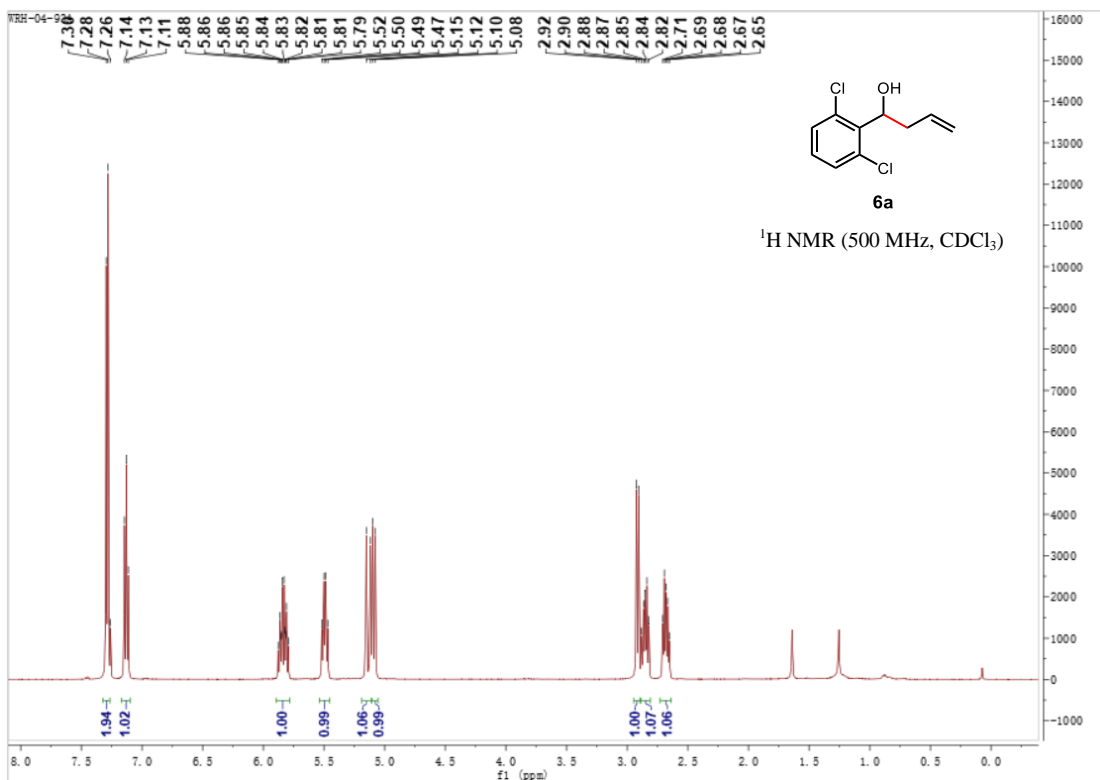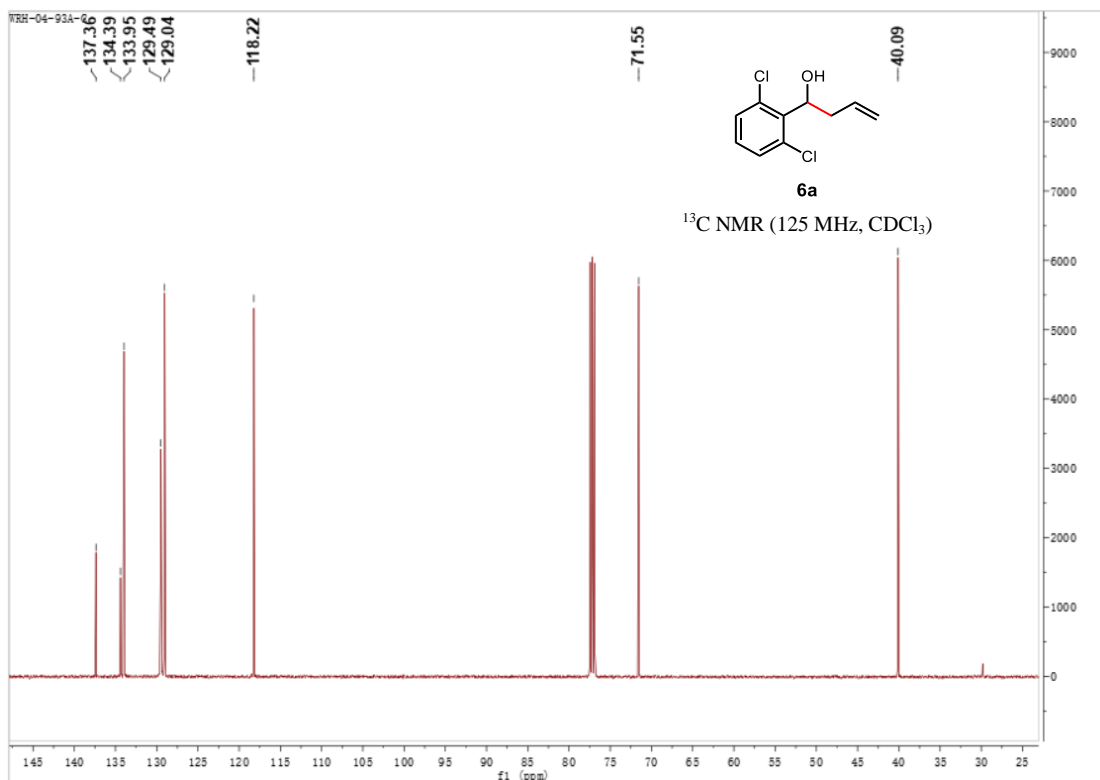

WRH-04-116A

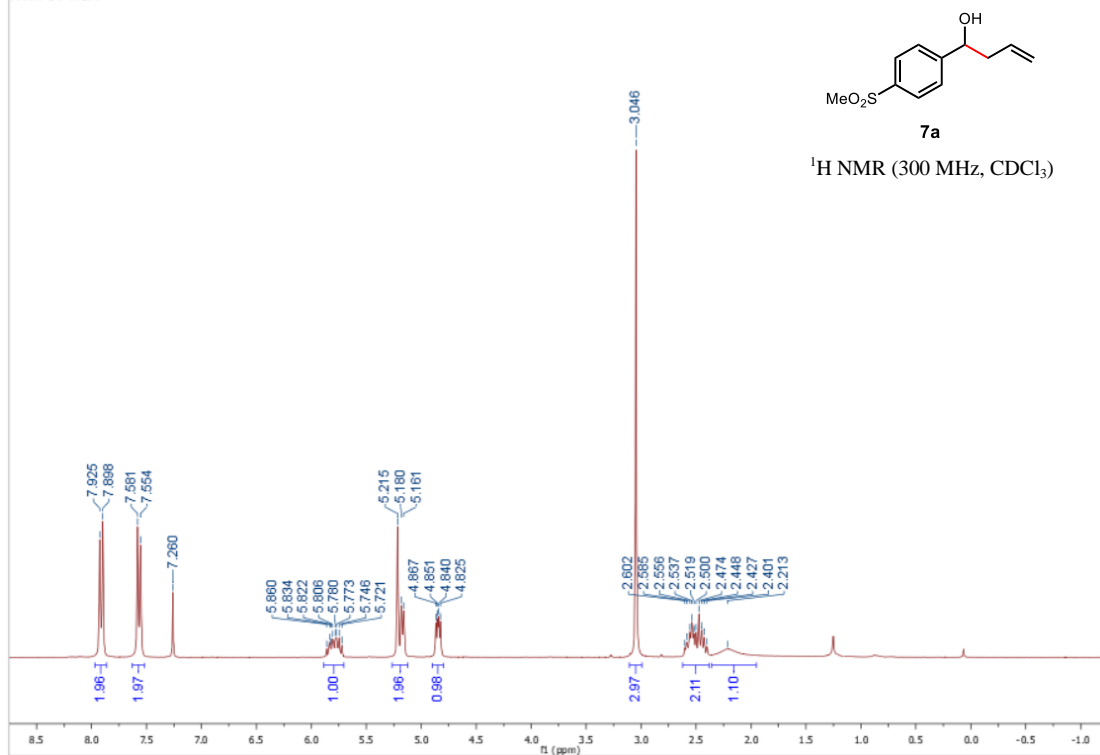

WRH-04-116A-C

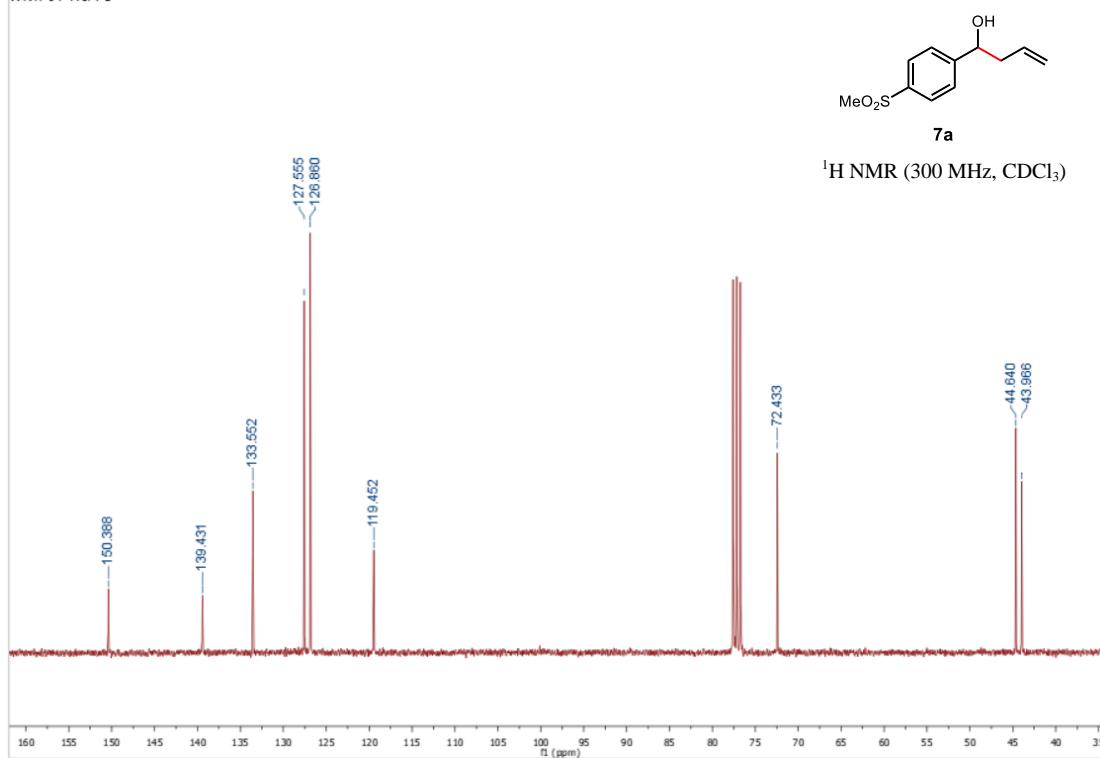

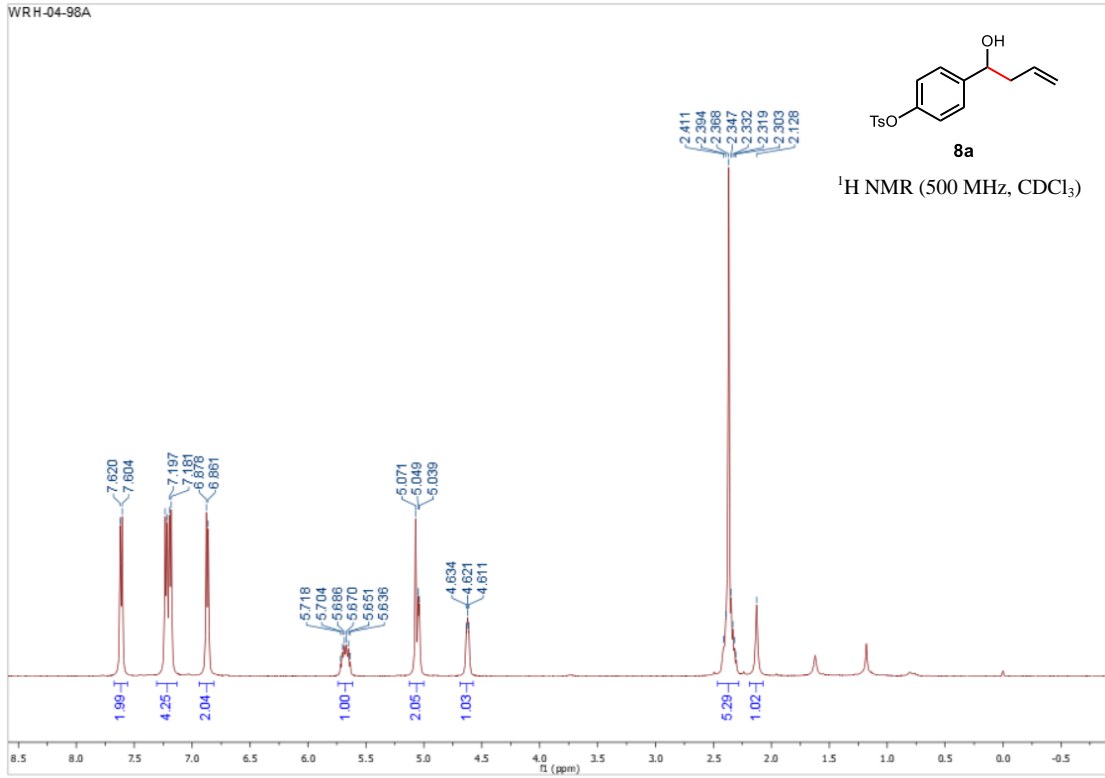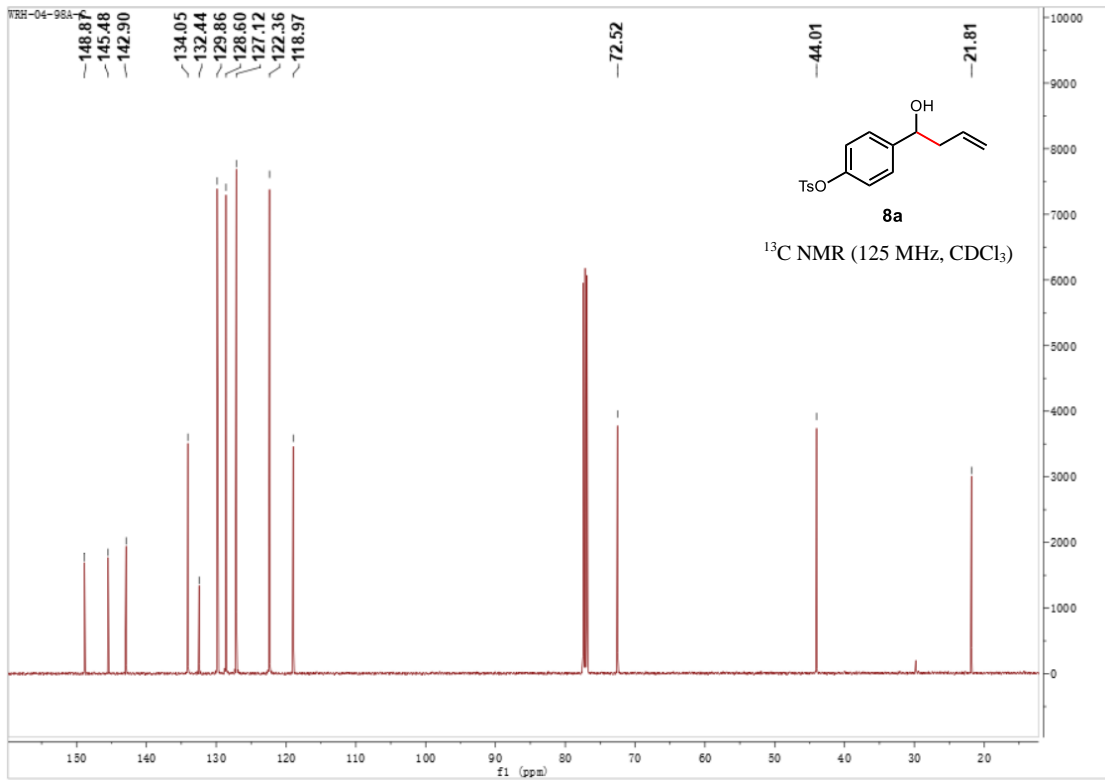



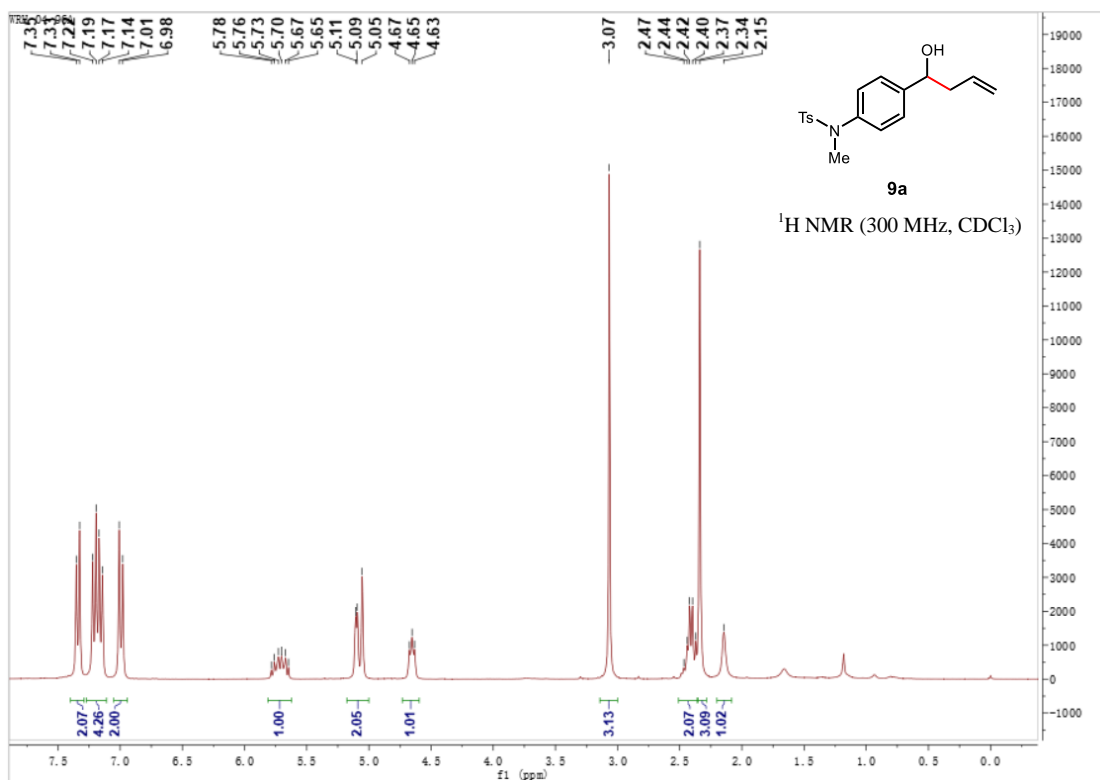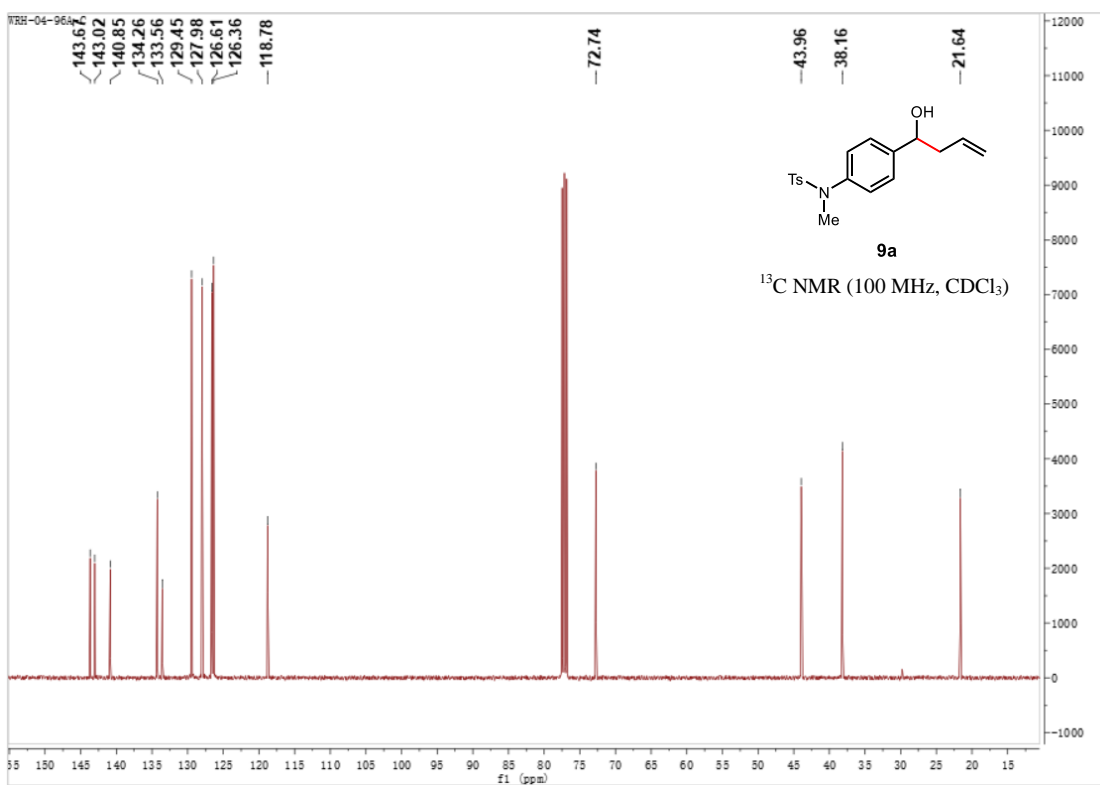

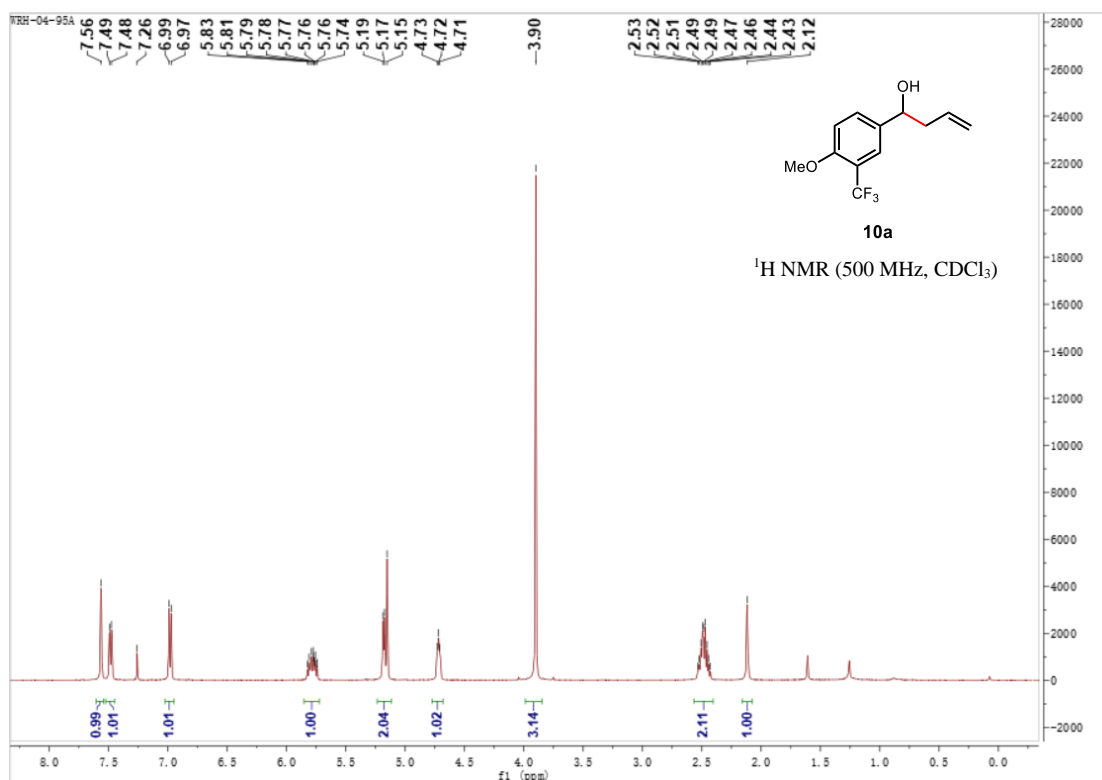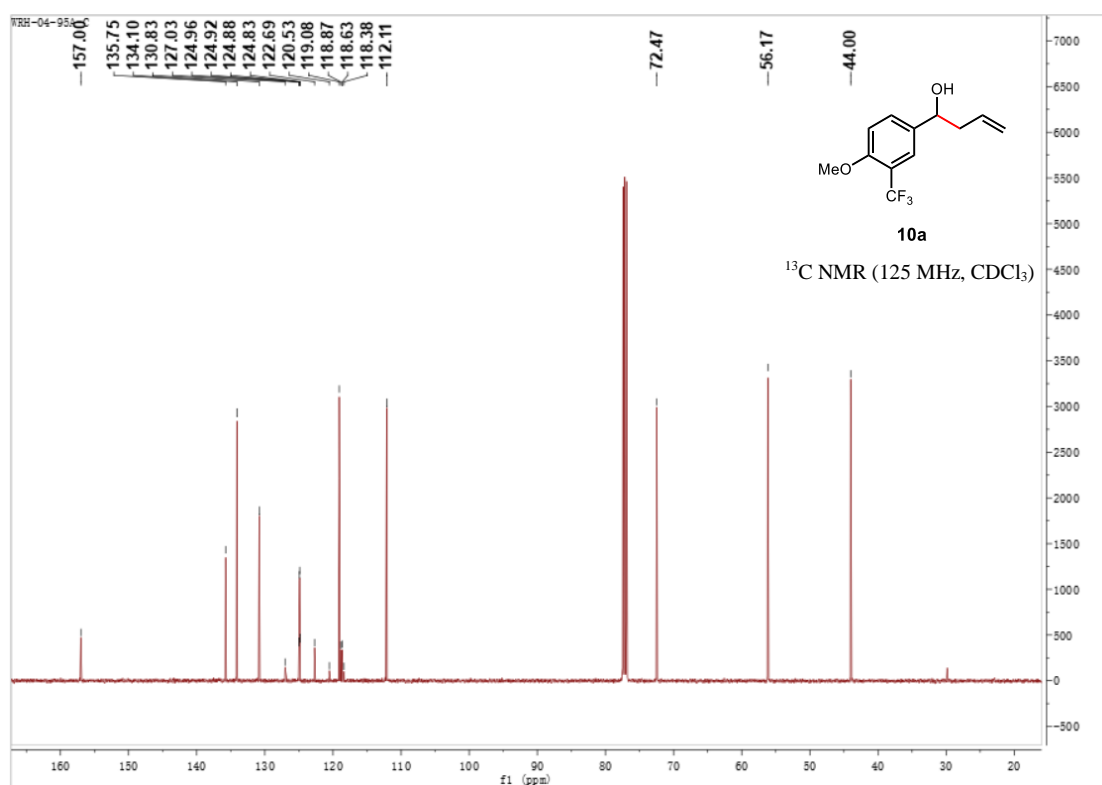

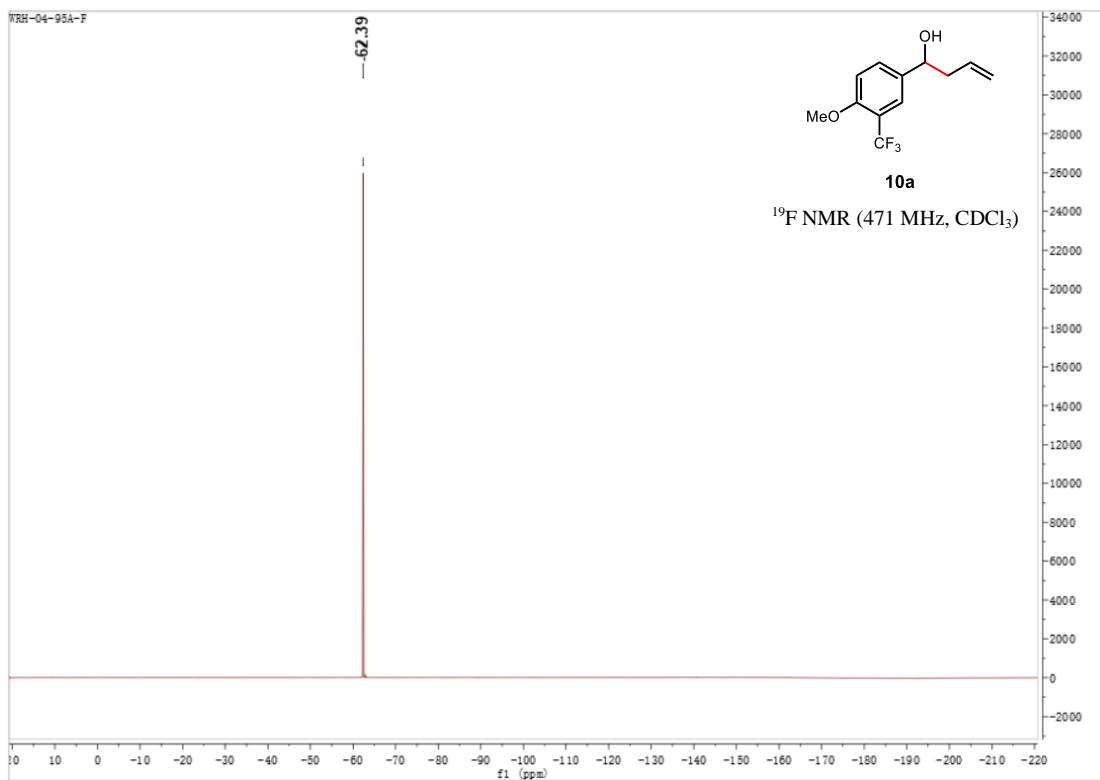

WRH-04-120A

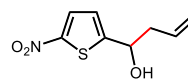

**11a**

<sup>1</sup>H NMR (300 MHz, CDCl<sub>3</sub>)

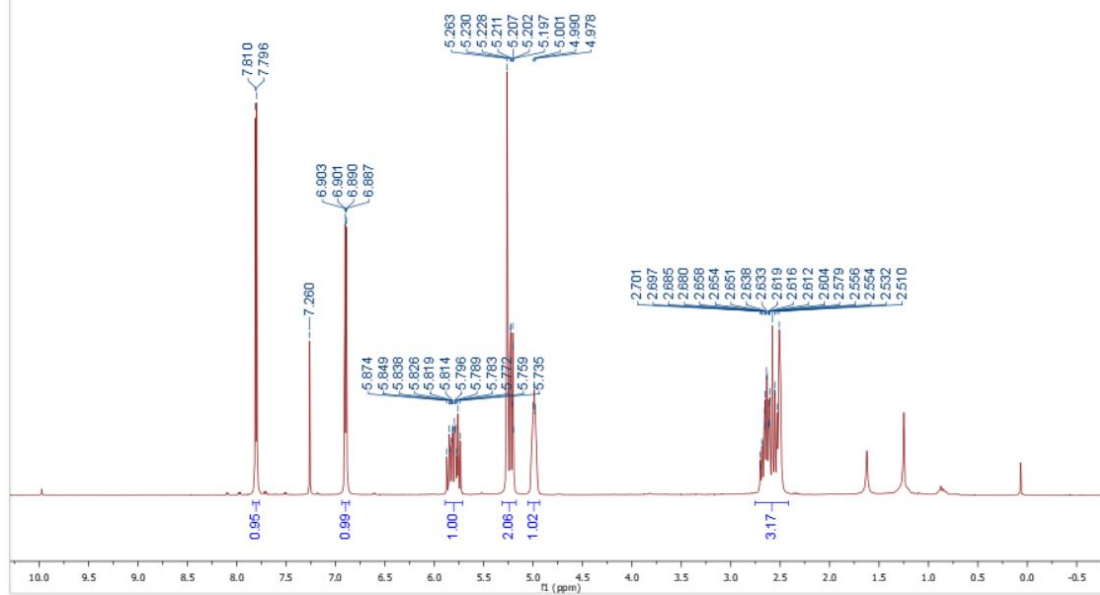

WRH-04-120A-C

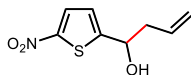

**11a**

<sup>13</sup>C NMR (75 MHz, CDCl<sub>3</sub>)

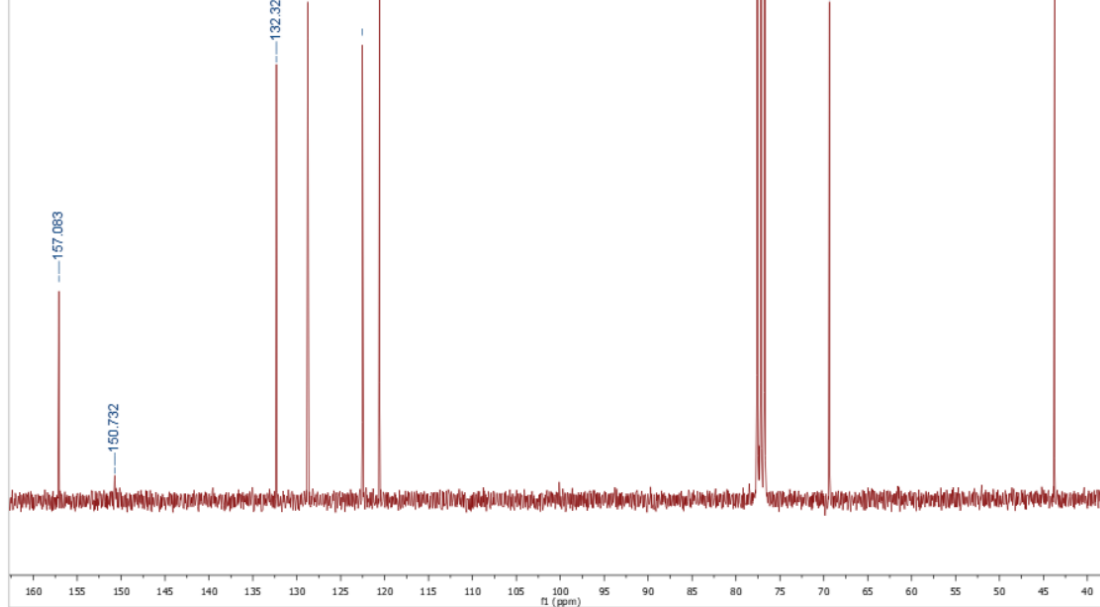

WRH-04-158B'

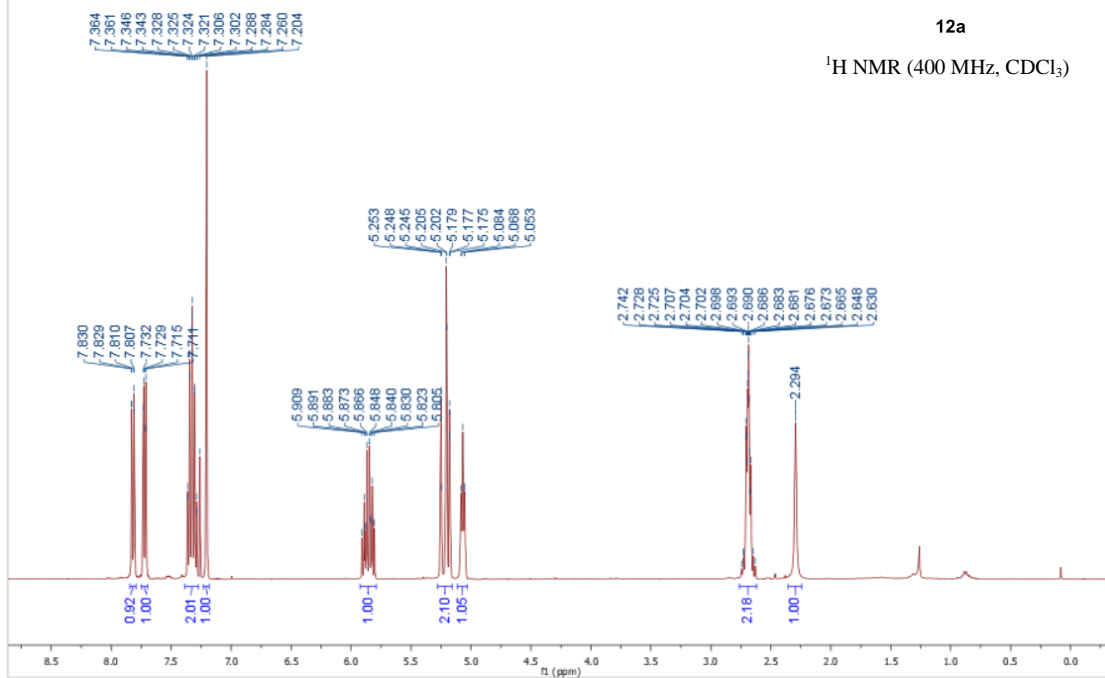

WRH-04-158B-C

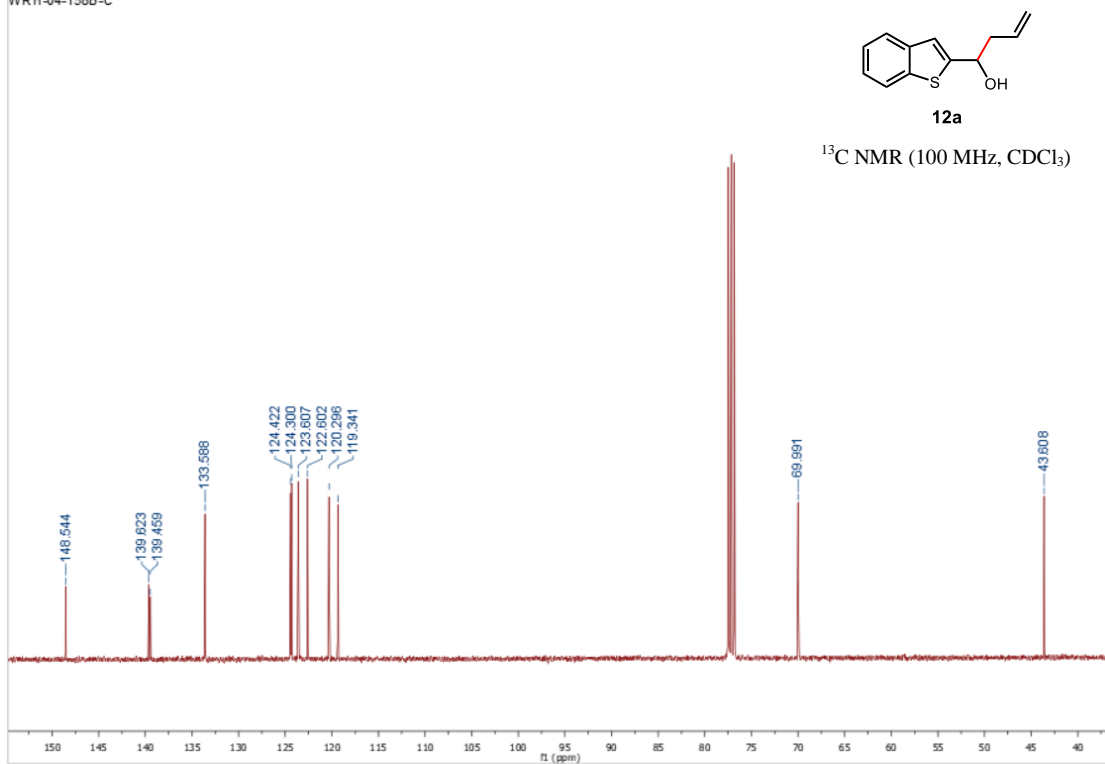

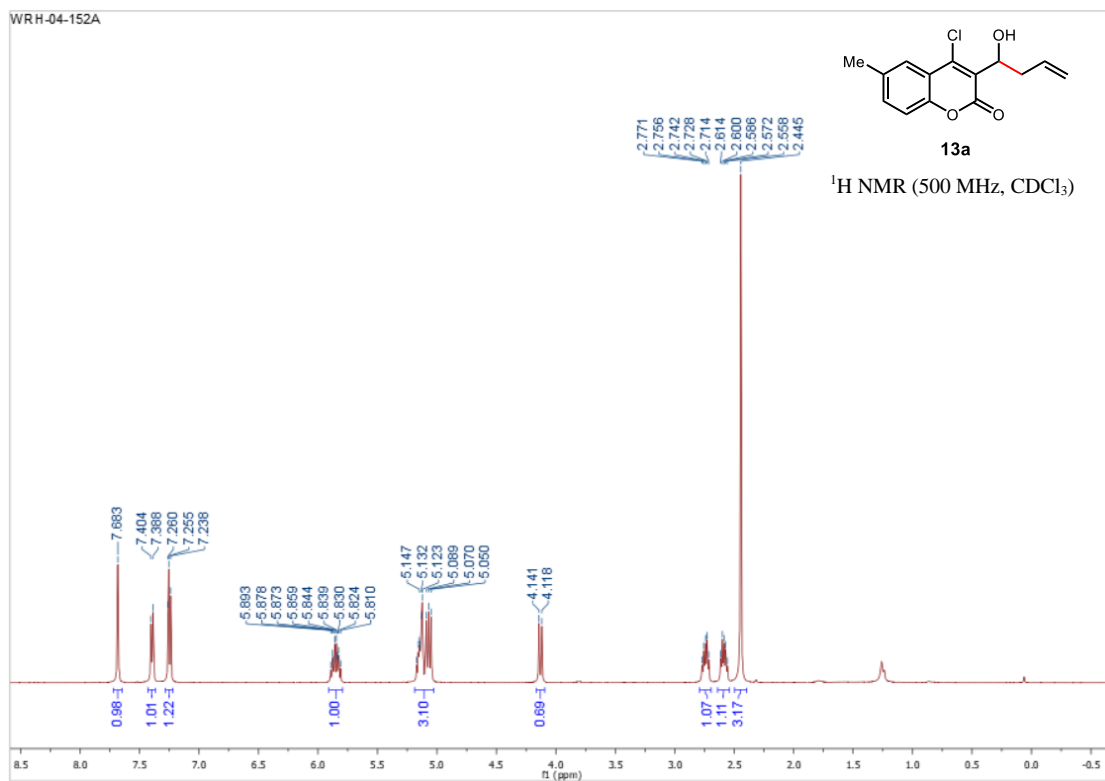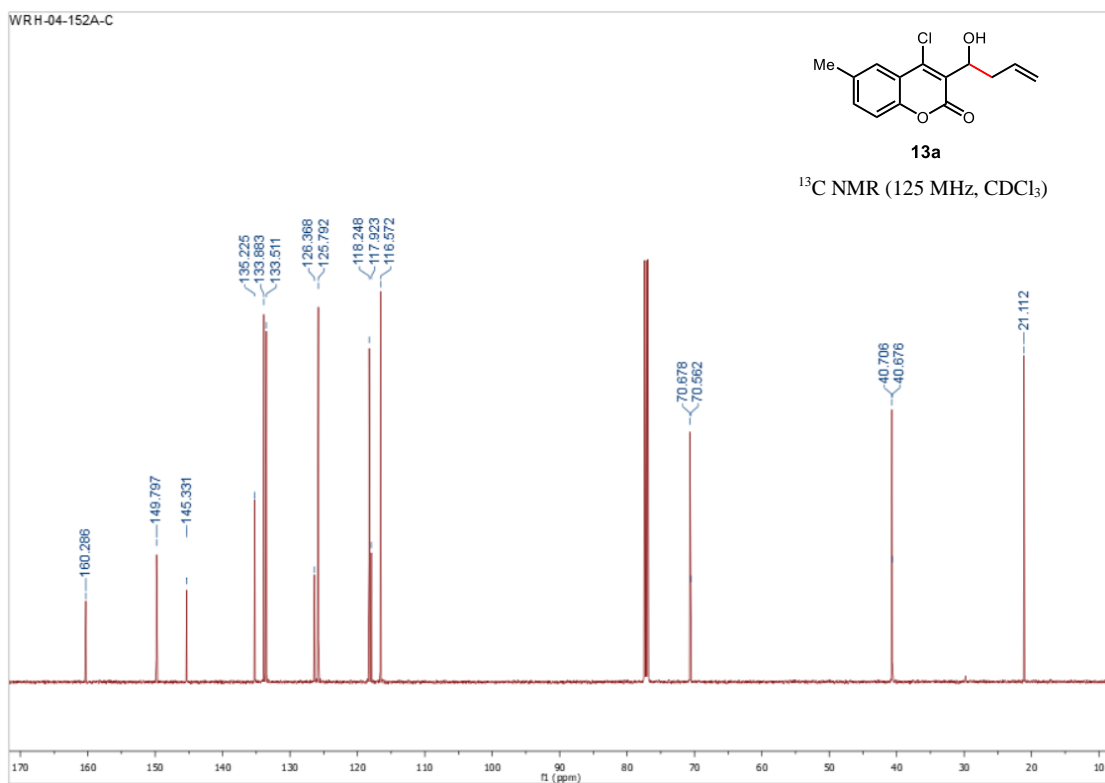

WRH-04-125B

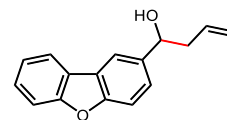

14a

<sup>1</sup>H NMR (500 MHz, CDCl<sub>3</sub>)

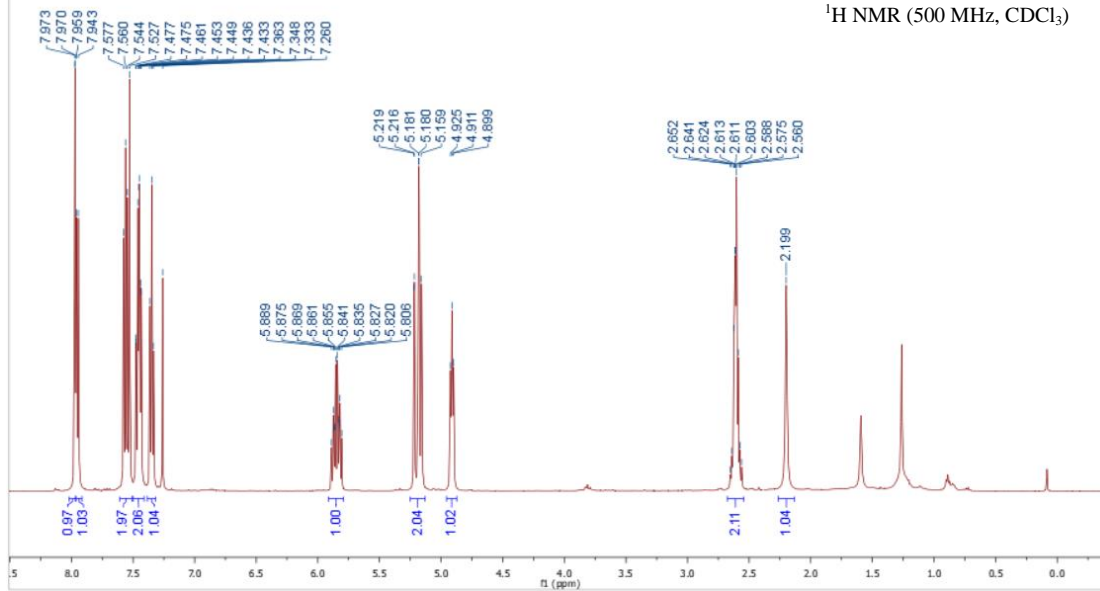

WRH-04-125B-C

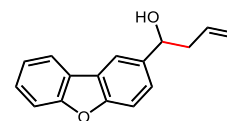

14a

<sup>13</sup>C NMR (125 MHz, CDCl<sub>3</sub>)

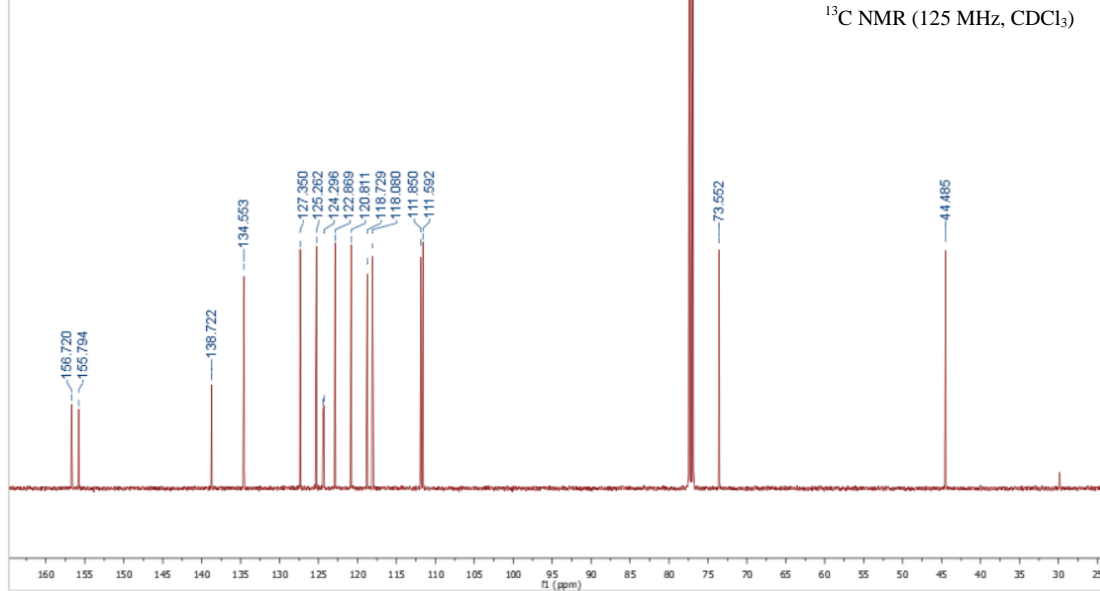

WRH-04-107B

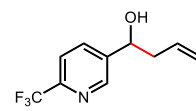

15a

<sup>1</sup>H NMR (400 MHz, CDCl<sub>3</sub>)

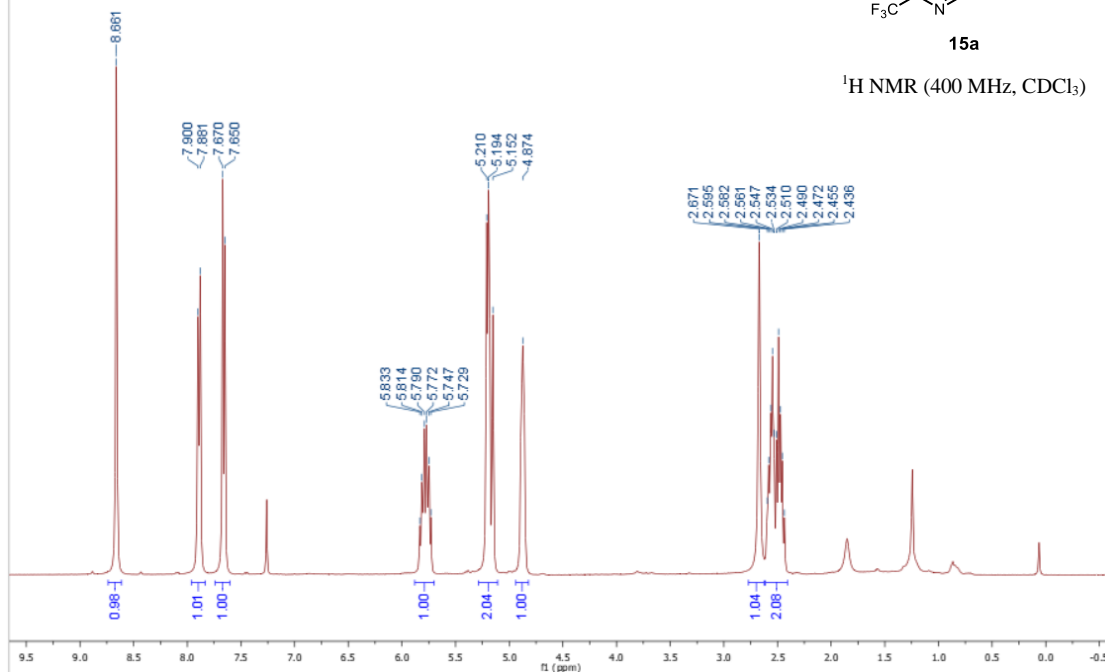

WRH-04-107B-C

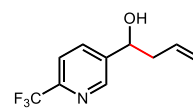

15a

<sup>13</sup>C NMR (100 MHz, CDCl<sub>3</sub>)

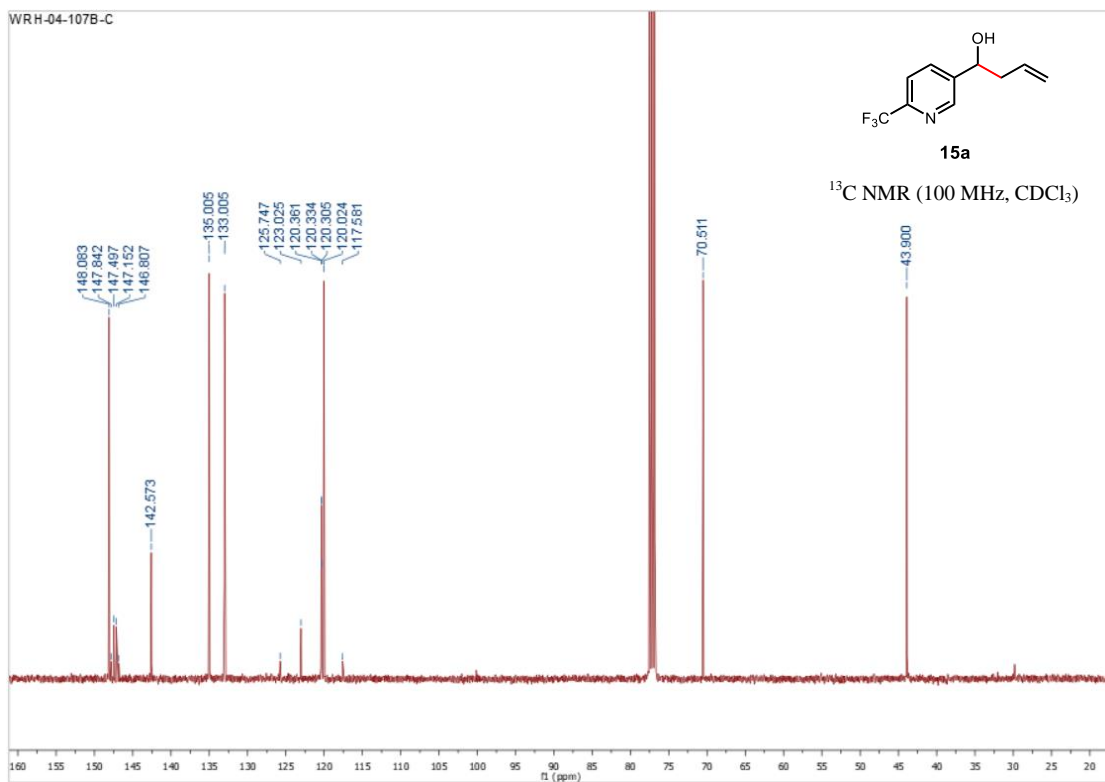



WRH-04-107B-F

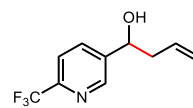

**15a**

<sup>19</sup>F NMR (376 MHz, CDCl<sub>3</sub>)

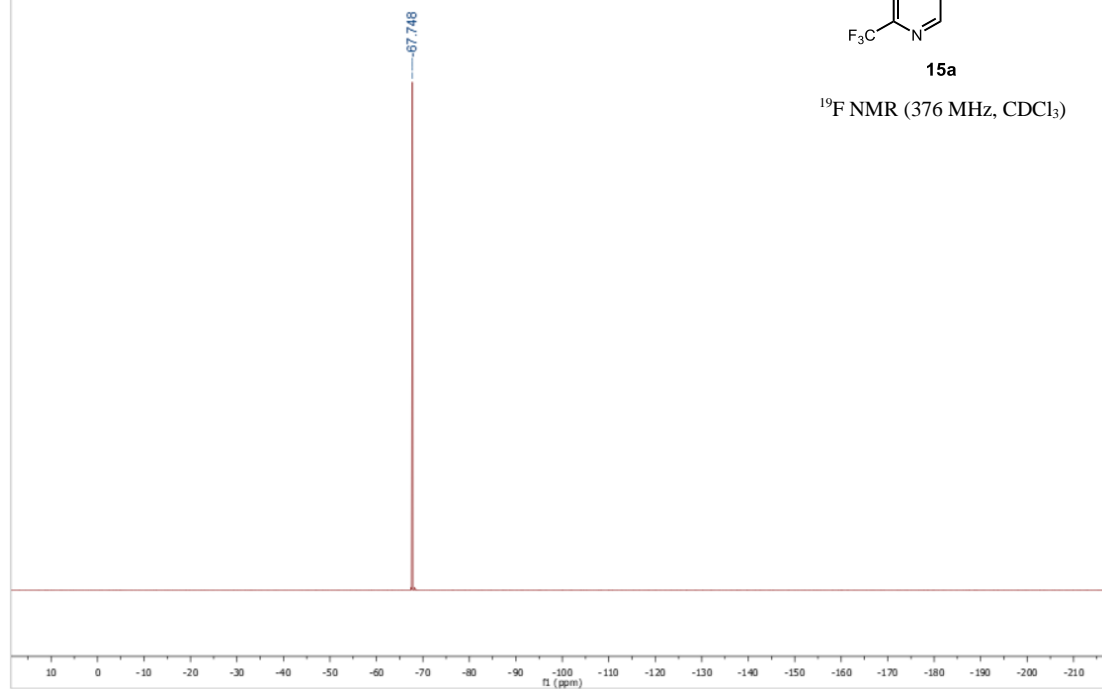

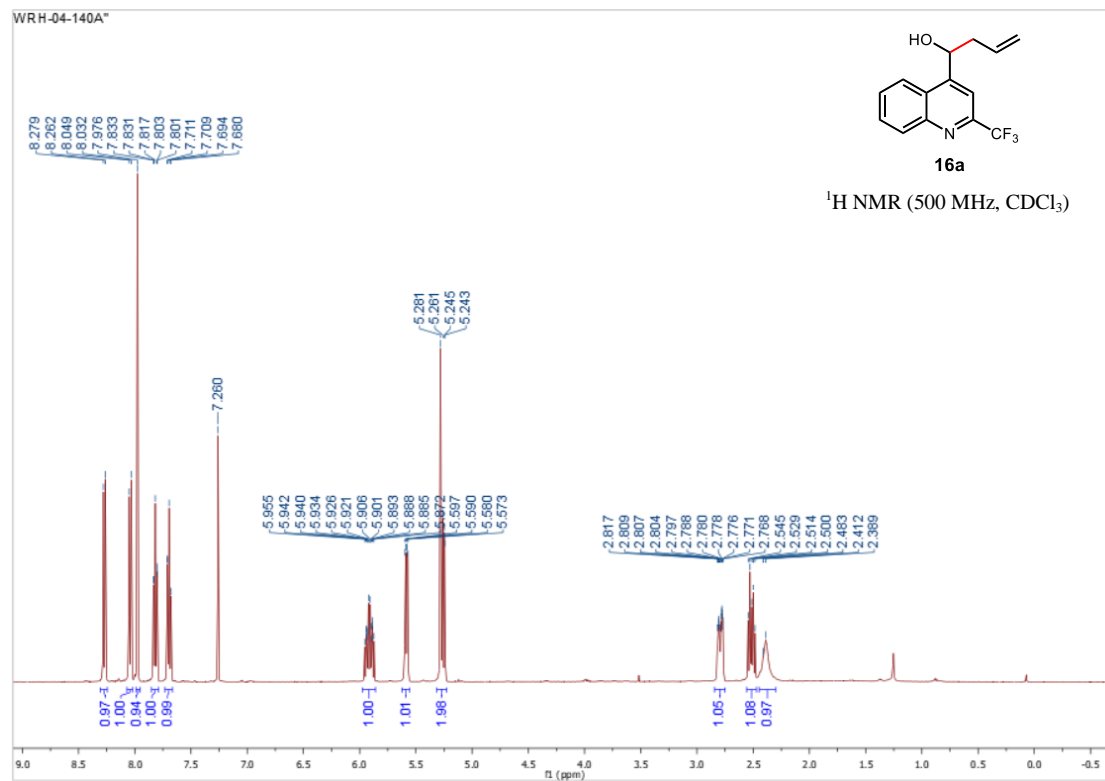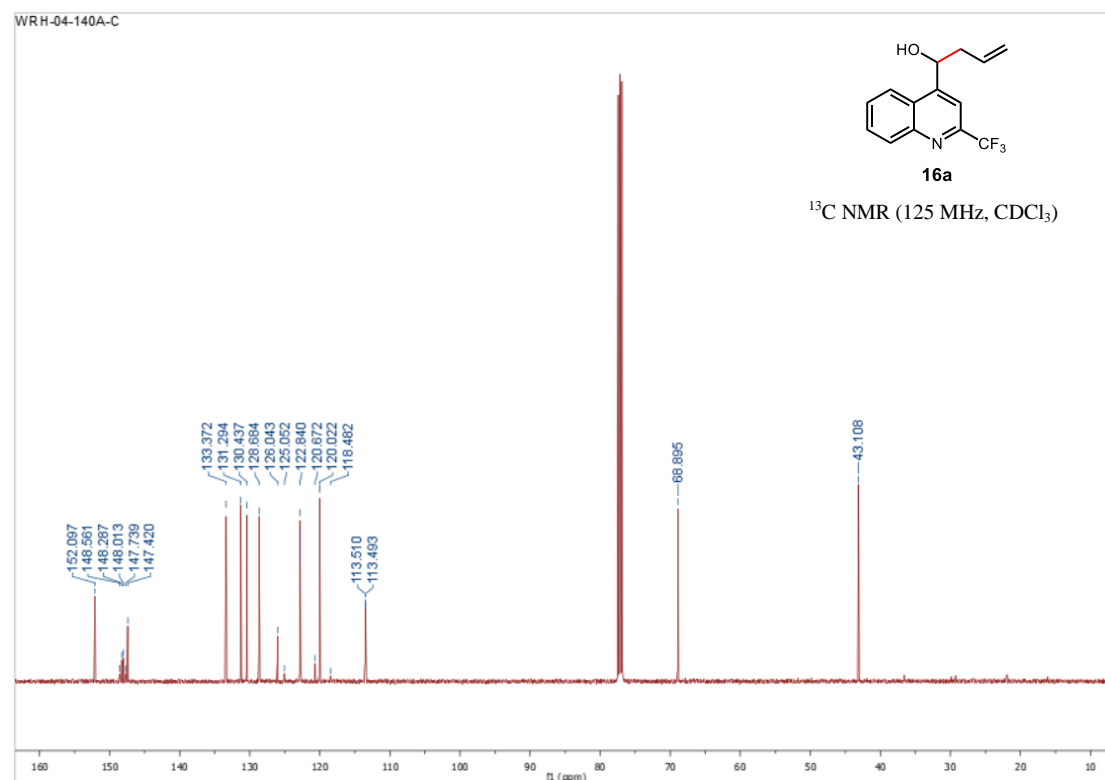

WRH-04-140A-F

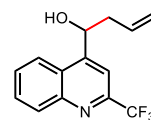

**16a**

<sup>19</sup>F NMR (470 MHz, CDCl<sub>3</sub>)

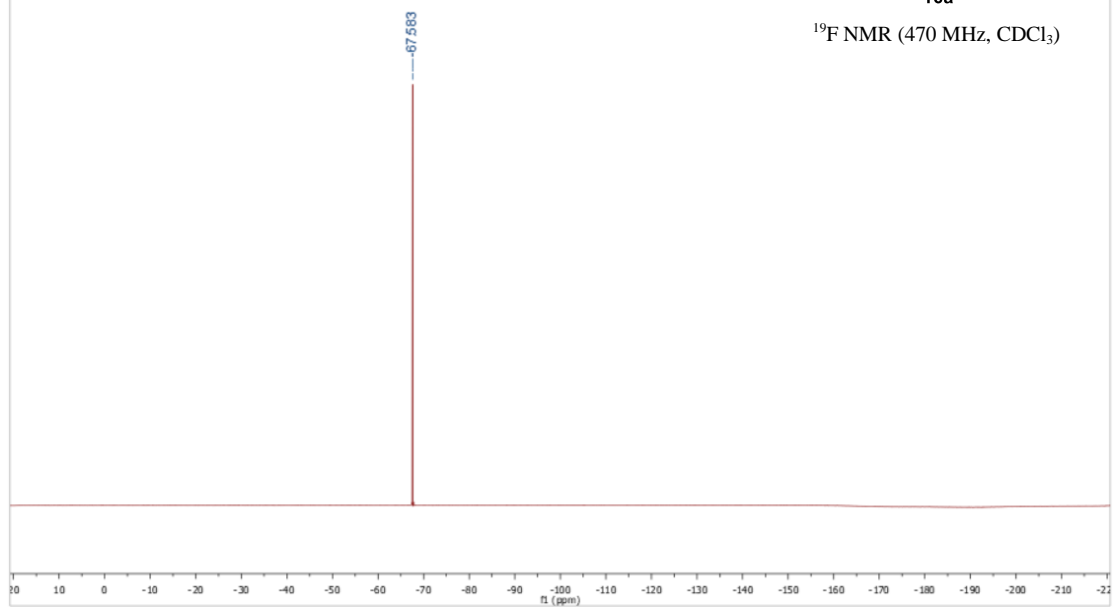

WRH-04-101B

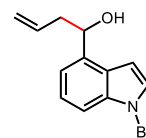

17a

<sup>1</sup>H NMR (400 MHz, CDCl<sub>3</sub>)

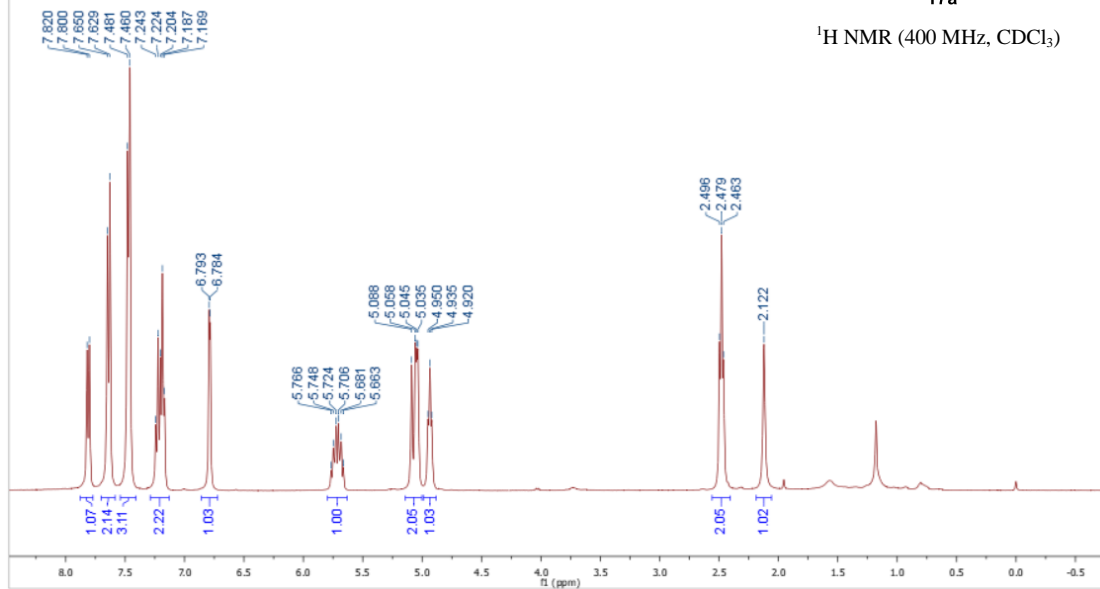

WRH-04-101B-C

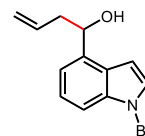

17a

<sup>13</sup>C NMR (100 MHz, CDCl<sub>3</sub>)

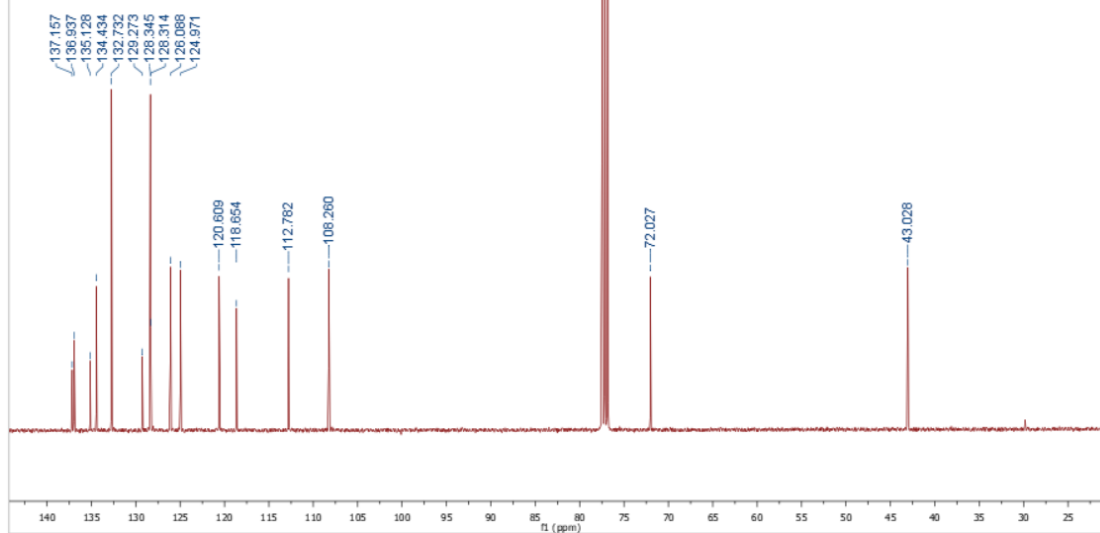

WRH-04-159A

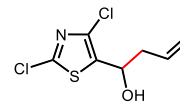

**18a**

$^1\text{H}$  NMR (500 MHz,  $\text{CDCl}_3$ )

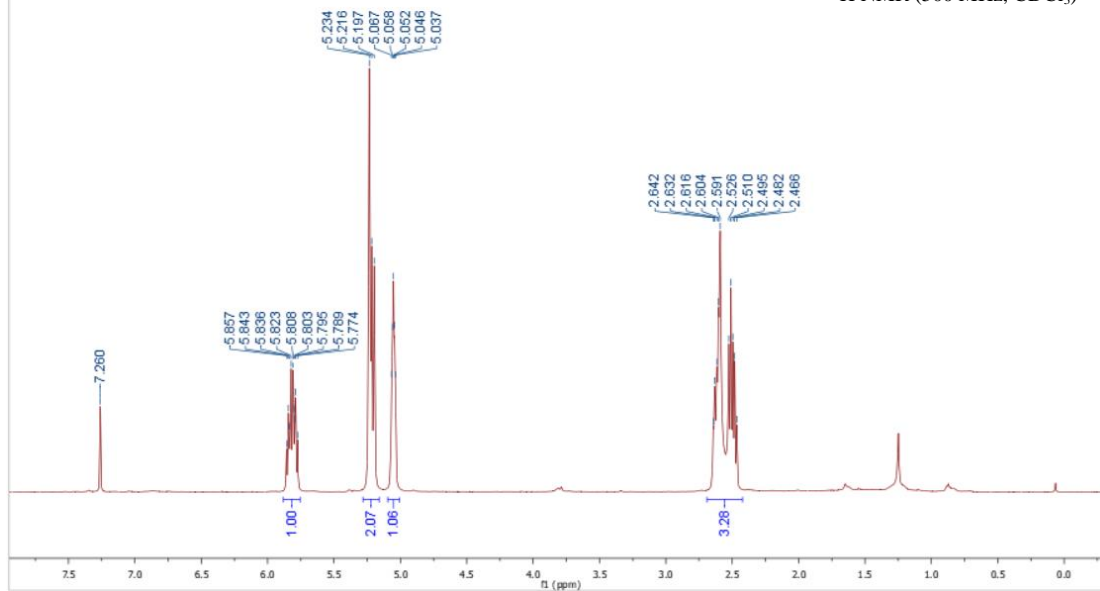

WRH-04-159A-C

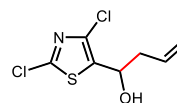

**18a**

$^{13}\text{C}$  NMR (125 MHz,  $\text{CDCl}_3$ )

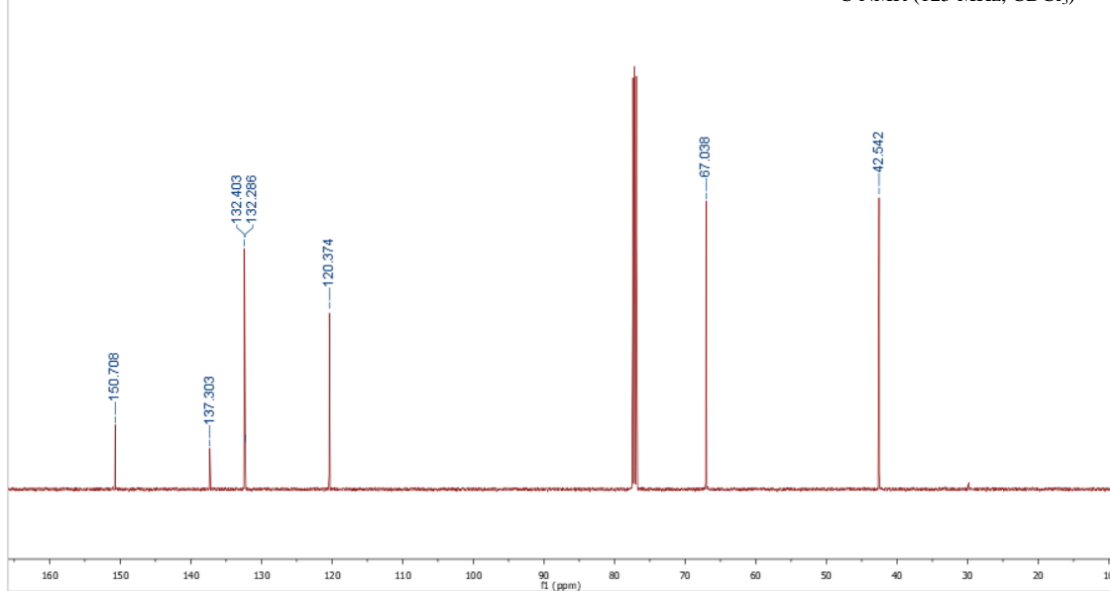

WRH-04-154B

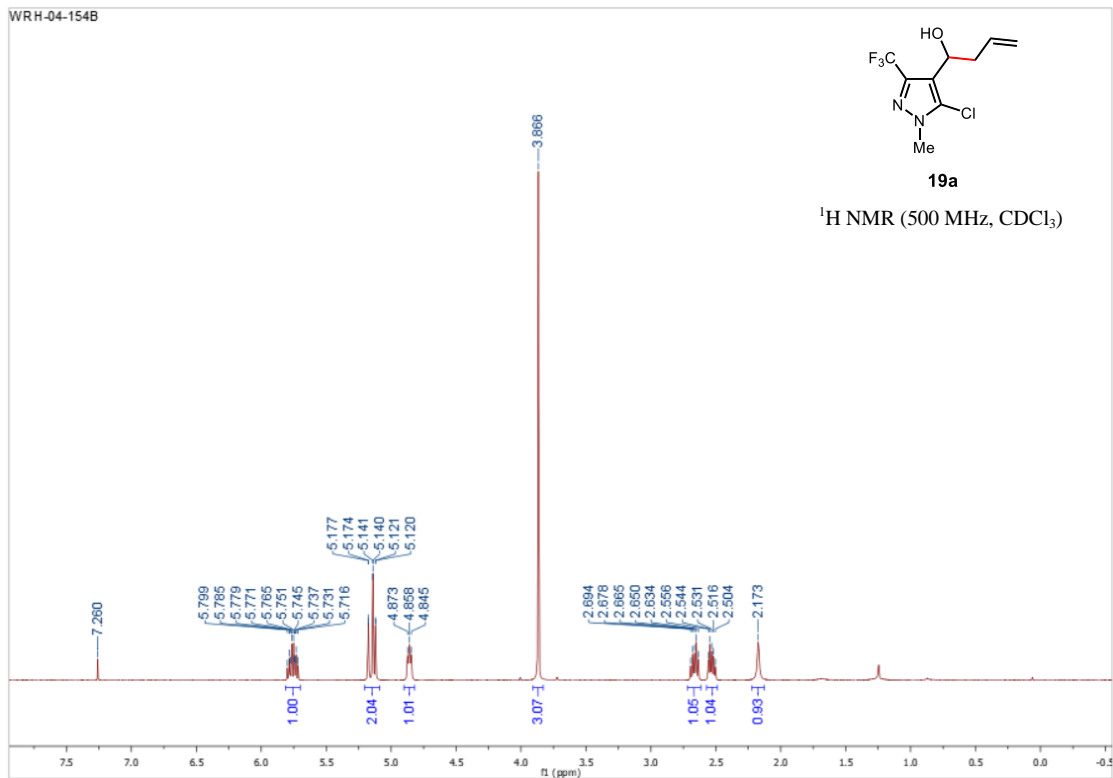

WRH-04-154B-C

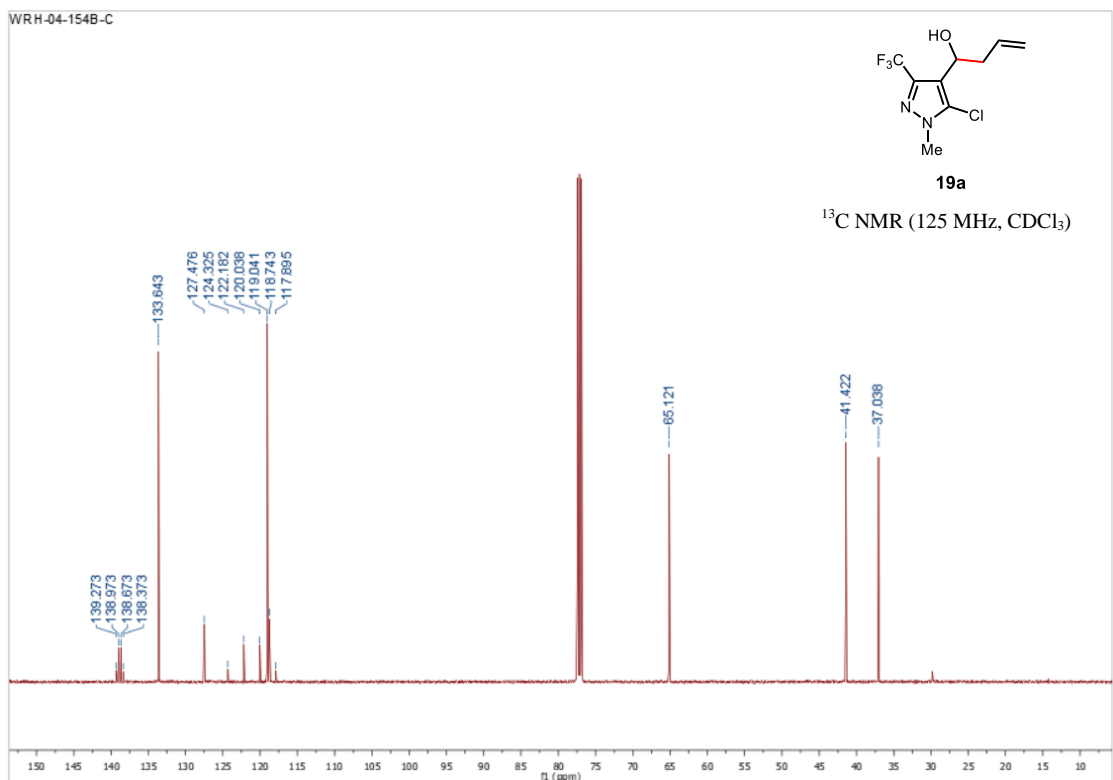

WRH-04-154B-F

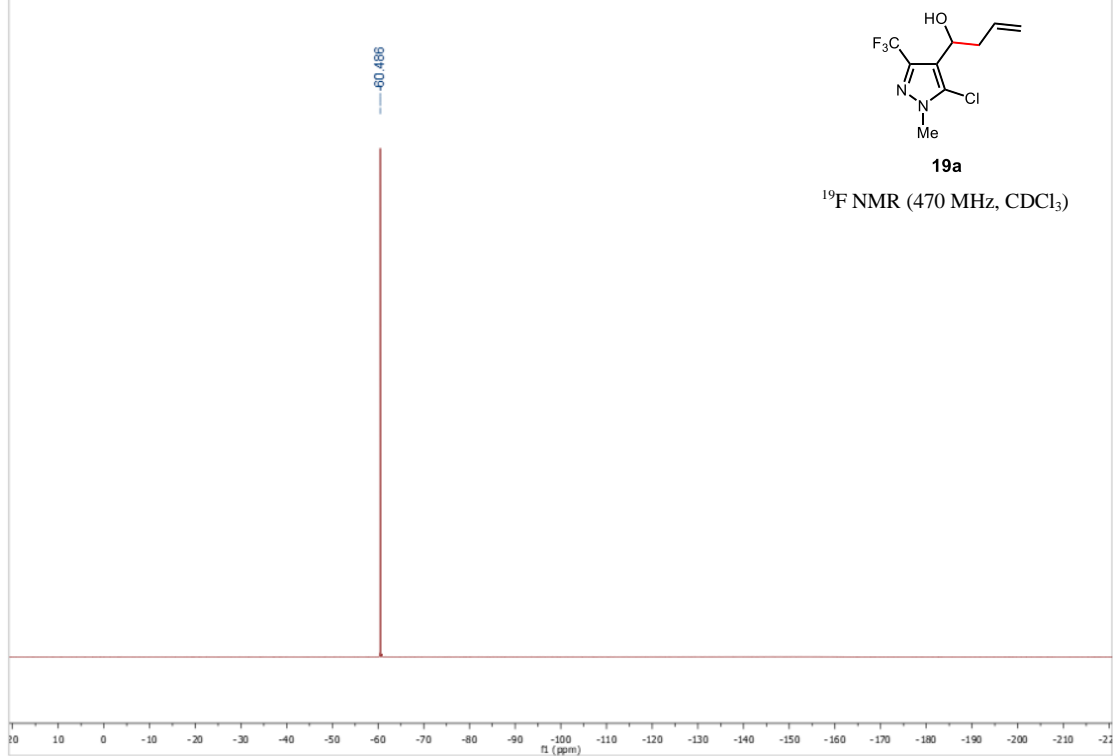

WRH-04-107A

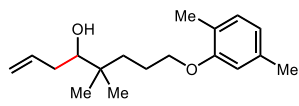

**20a**

$^1\text{H NMR}$  (400 MHz,  $\text{CDCl}_3$ )

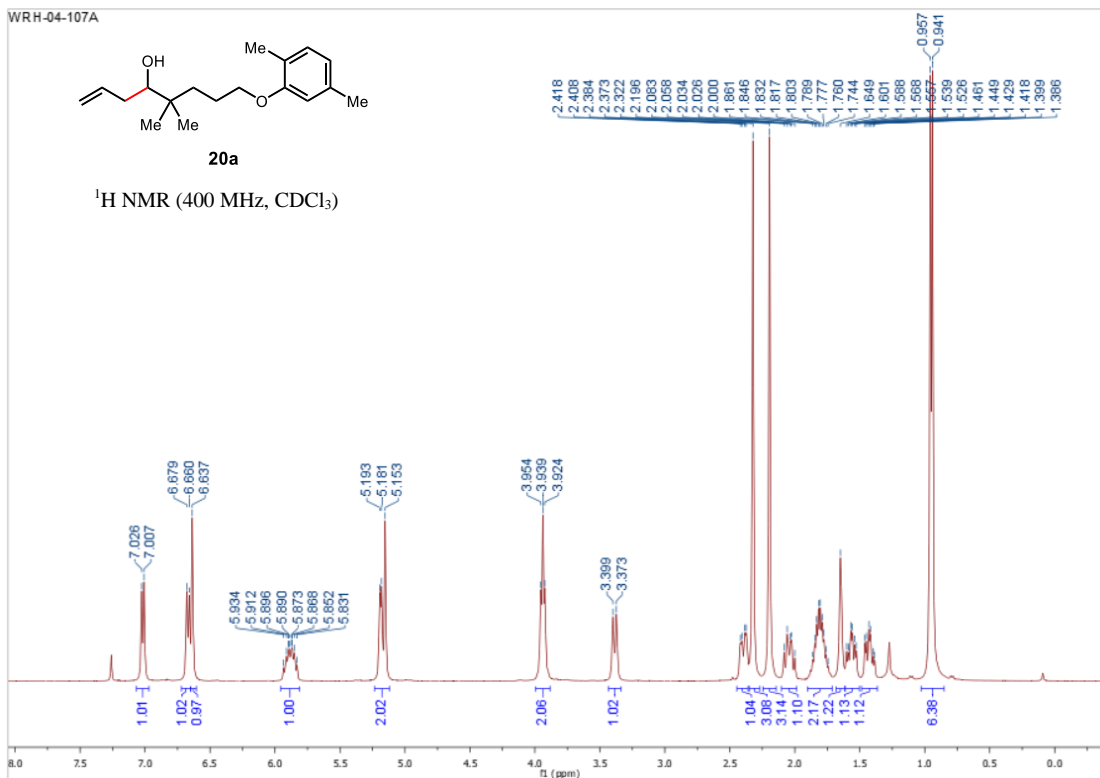

WRH-04-107A-C

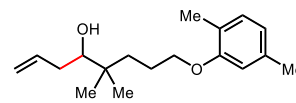

**20a**

$^{13}\text{C NMR}$  (100 MHz,  $\text{CDCl}_3$ )

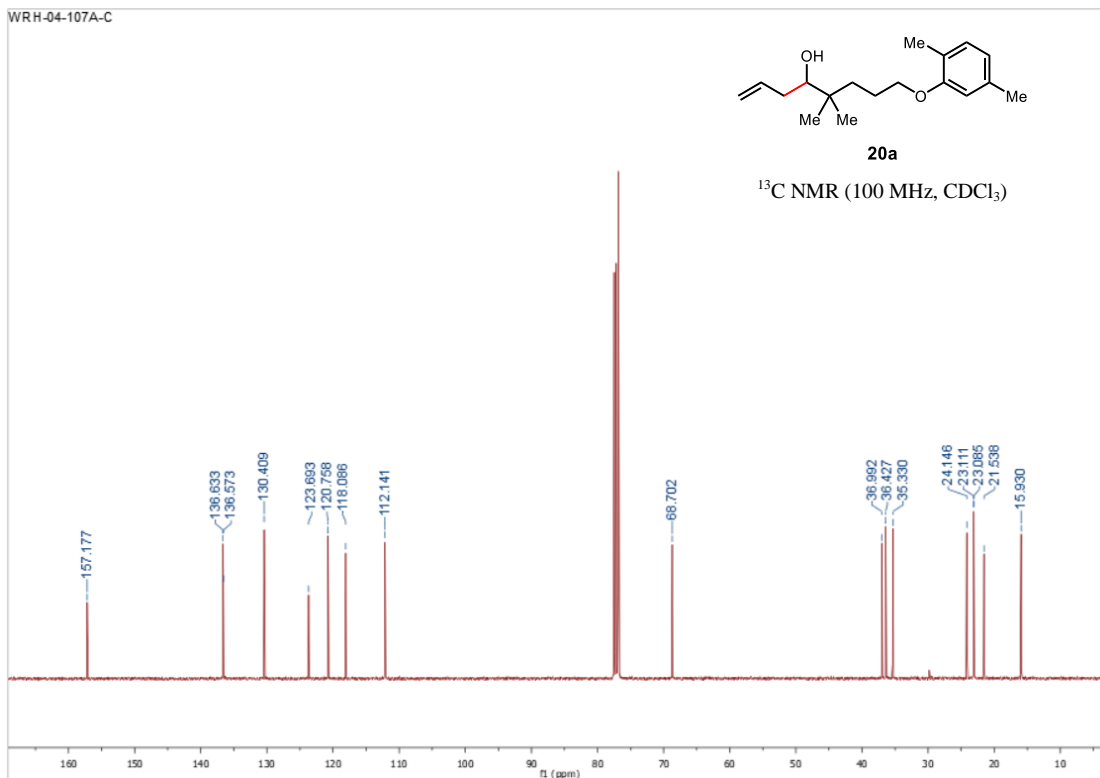



WRH-04-125A

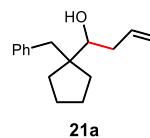

$^1\text{H NMR}$  (500 MHz,  $\text{CDCl}_3$ )

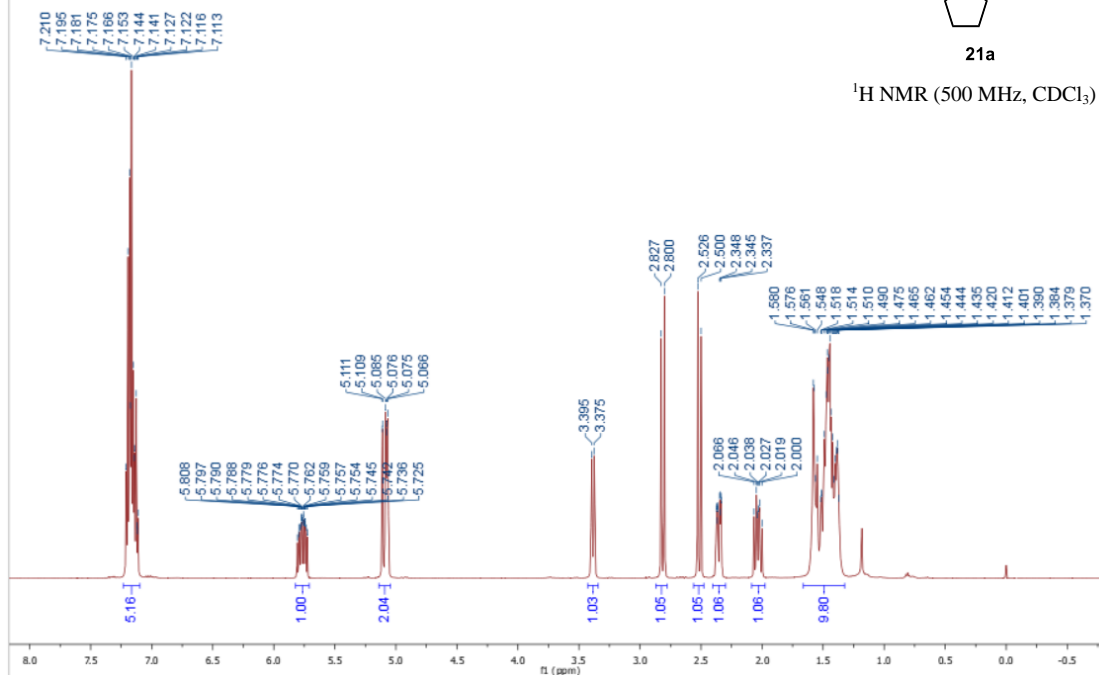

WRH-04-125A-C

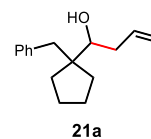

$^{13}\text{C NMR}$  (125 MHz,  $\text{CDCl}_3$ )

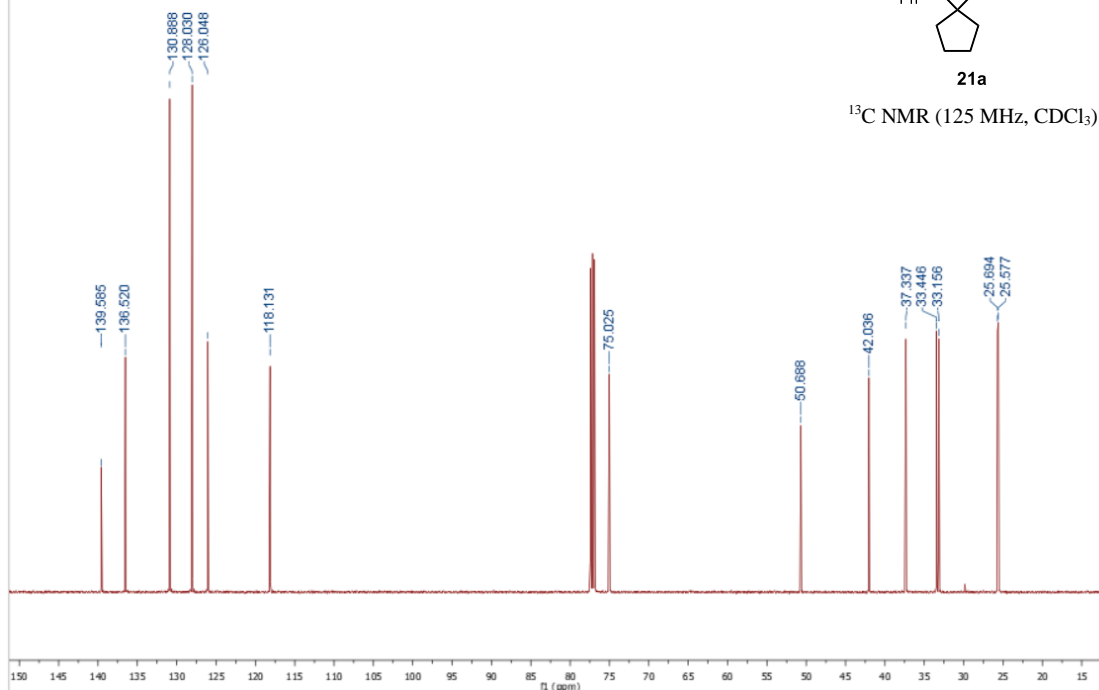

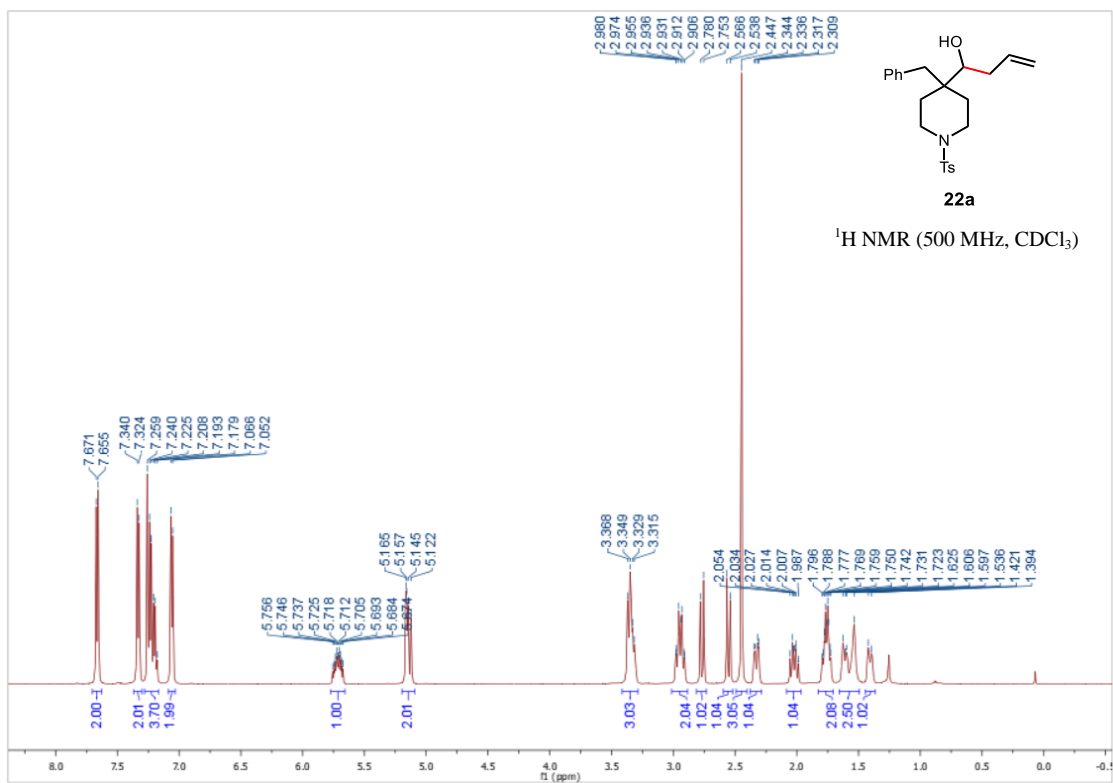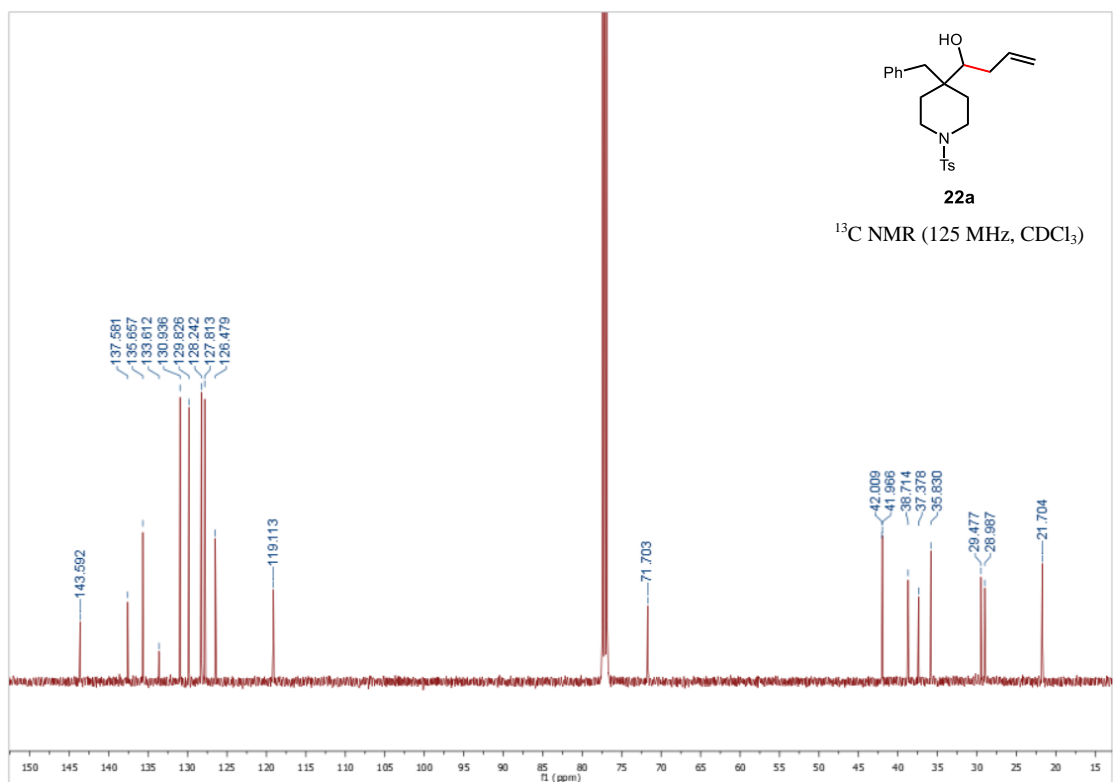

WRH-04-156B

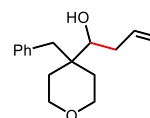

**23a**

$^1\text{H NMR}$  (500 MHz,  $\text{CDCl}_3$ )

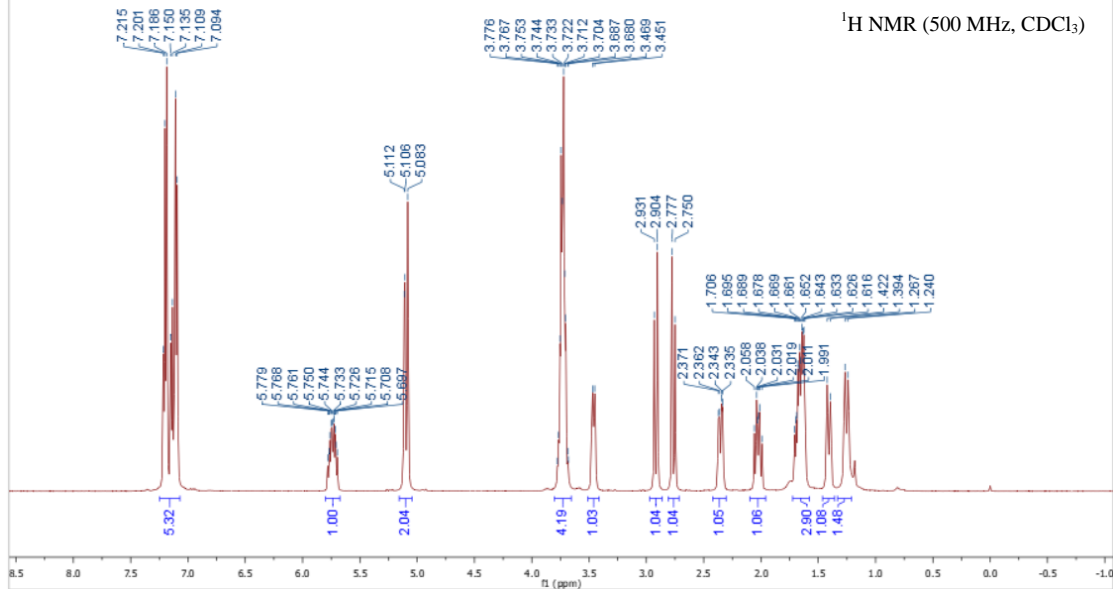

WRH-04-184A-C  
WRH-04-184A

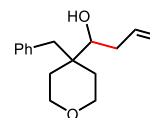

**23a**

$^{13}\text{C NMR}$  (100 MHz,  $\text{CDCl}_3$ )

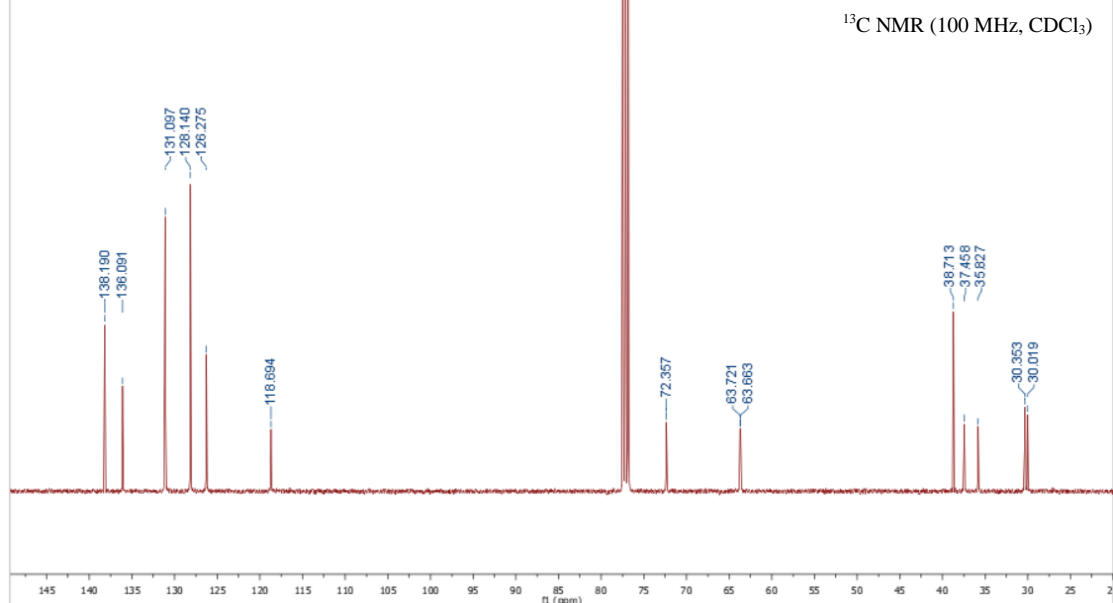

WRH-04-160C

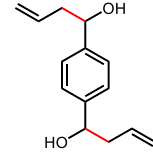

**24a**

<sup>1</sup>H NMR (500 MHz, CDCl<sub>3</sub>)

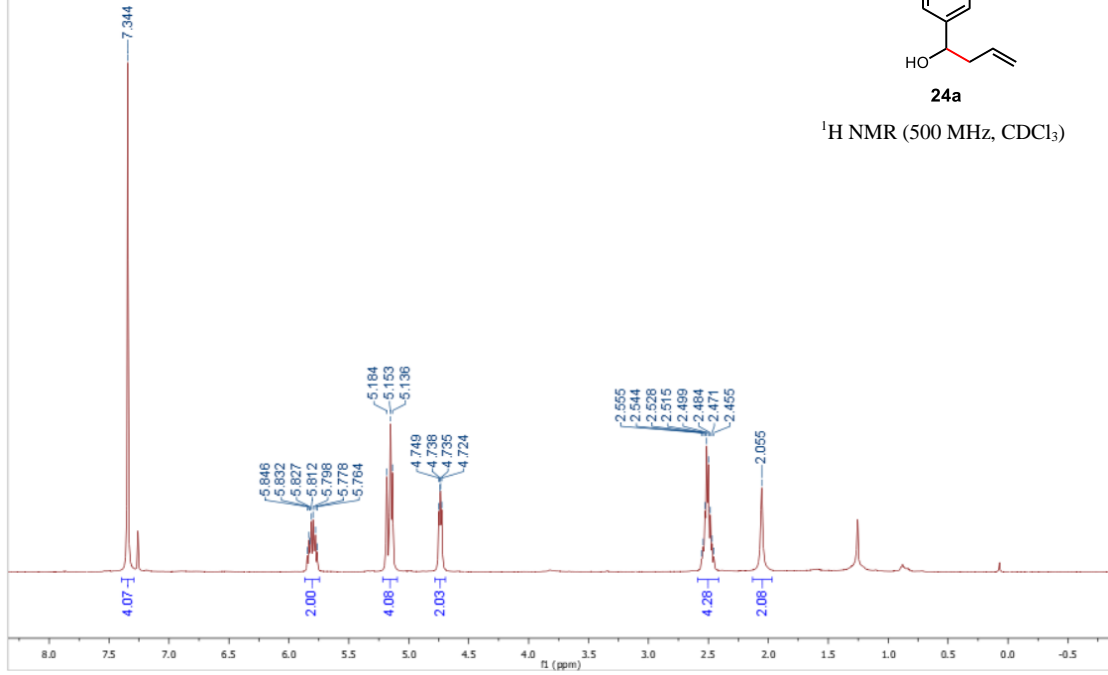

WRH-04-160C-C

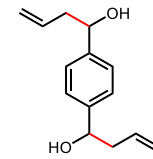

**24a**

<sup>13</sup>C NMR (125 MHz, CDCl<sub>3</sub>)

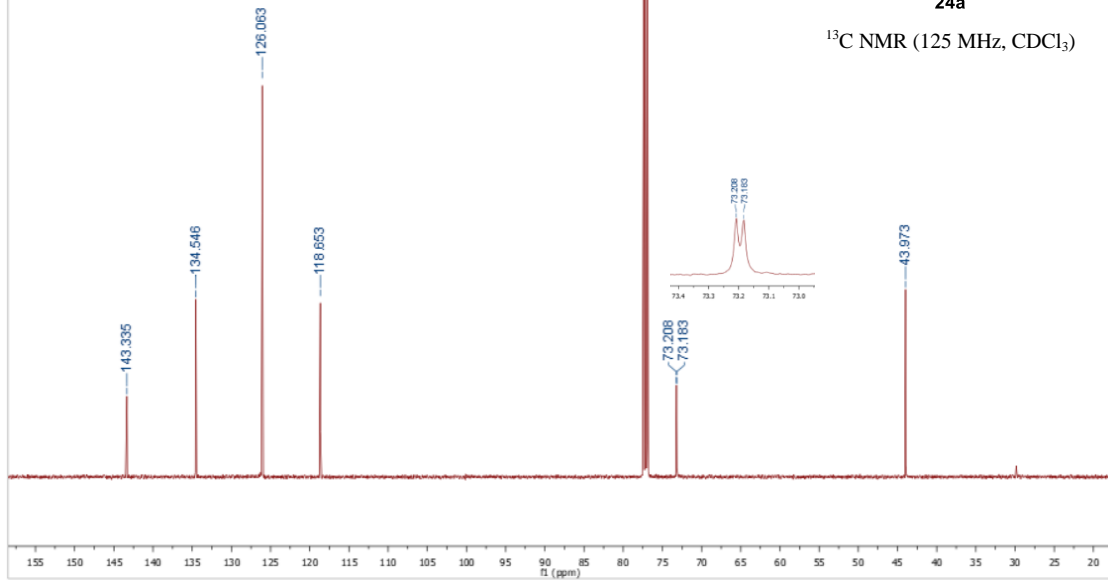

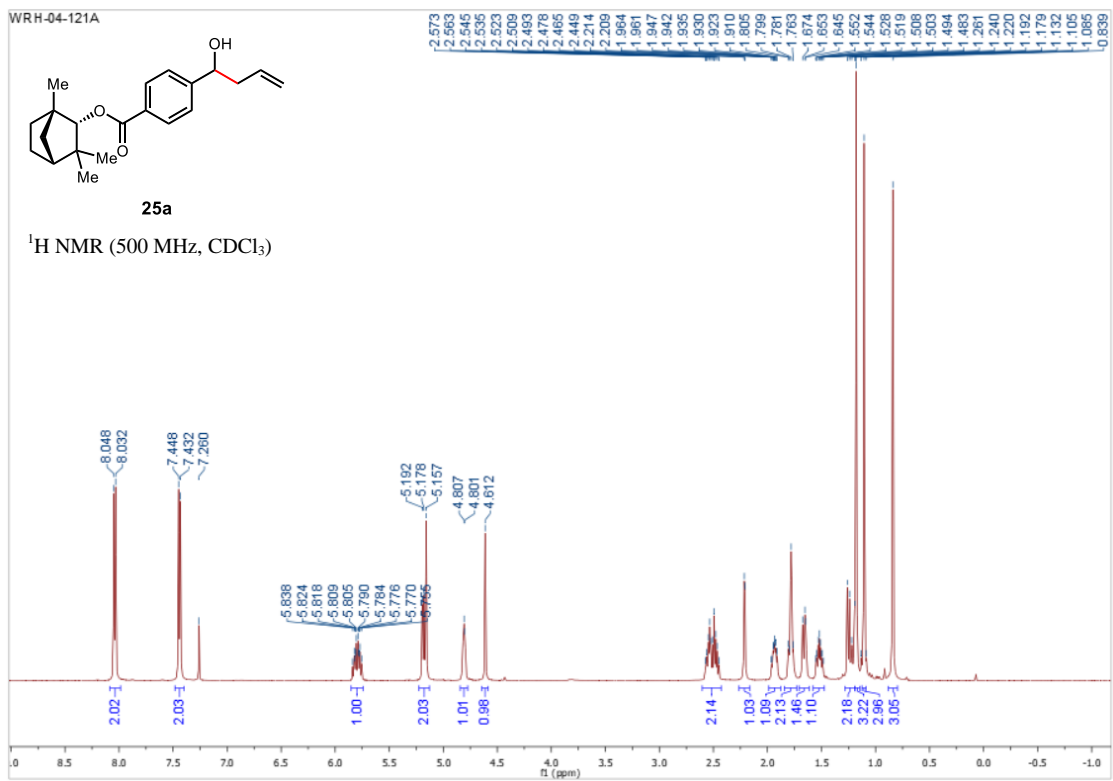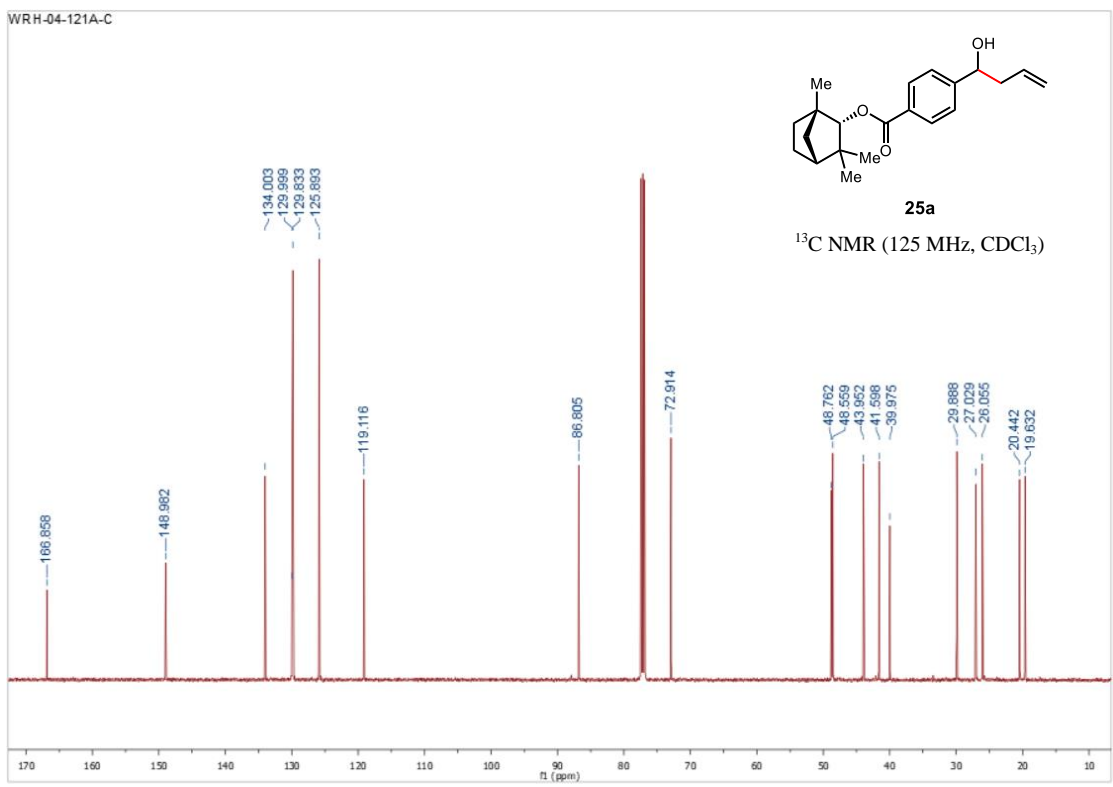

WRH-04-107C

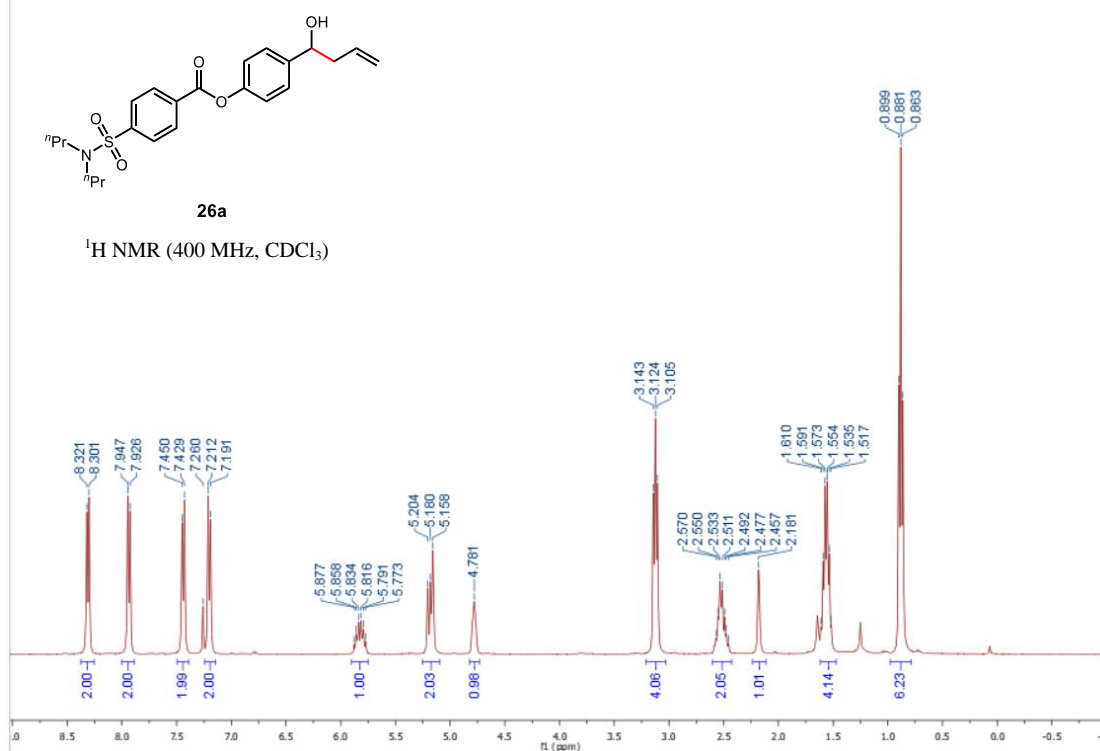

WRH-04-107C-C

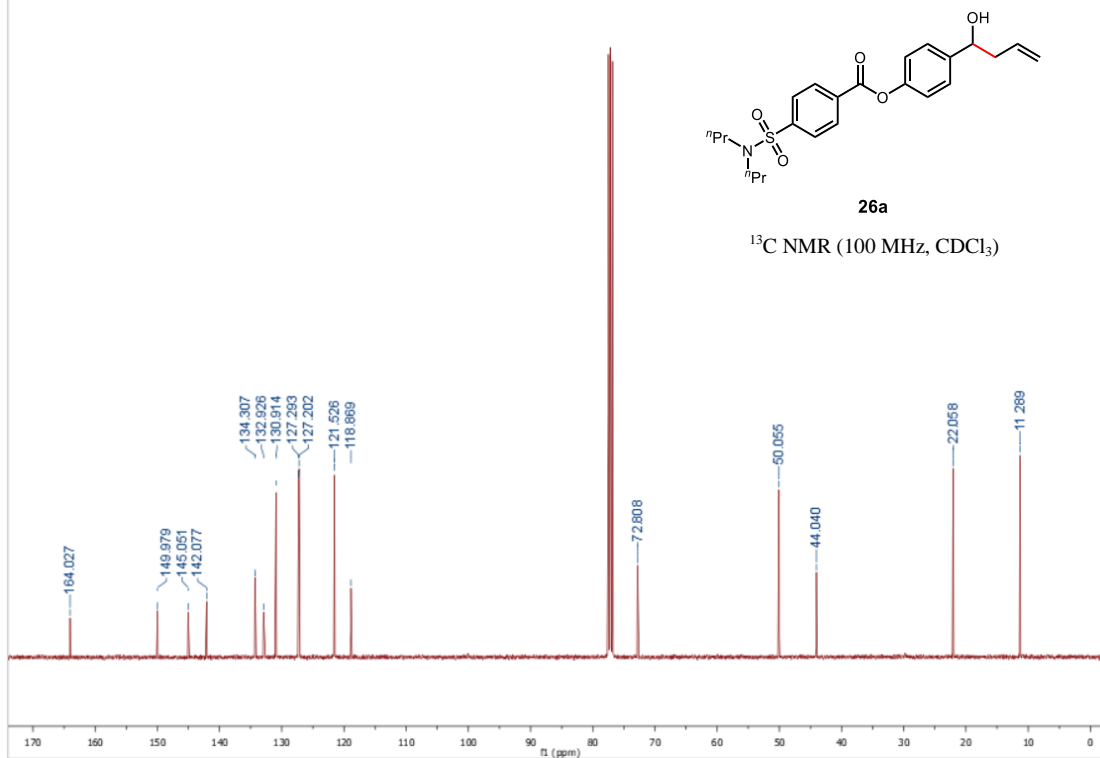

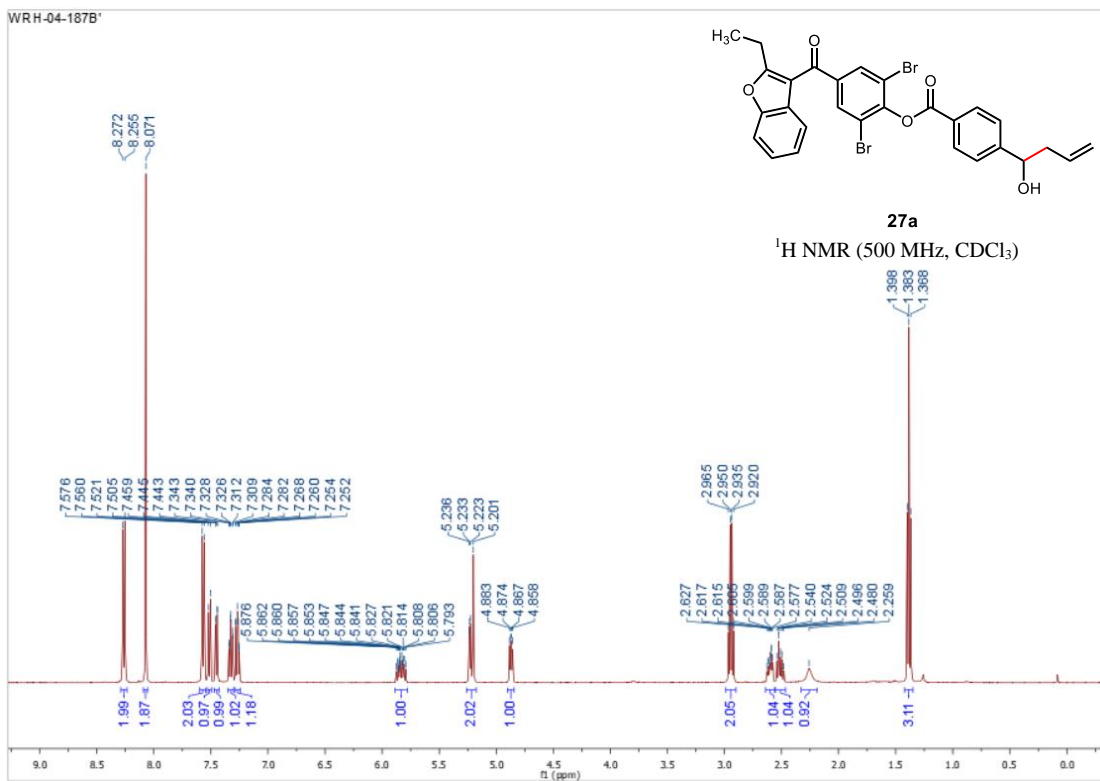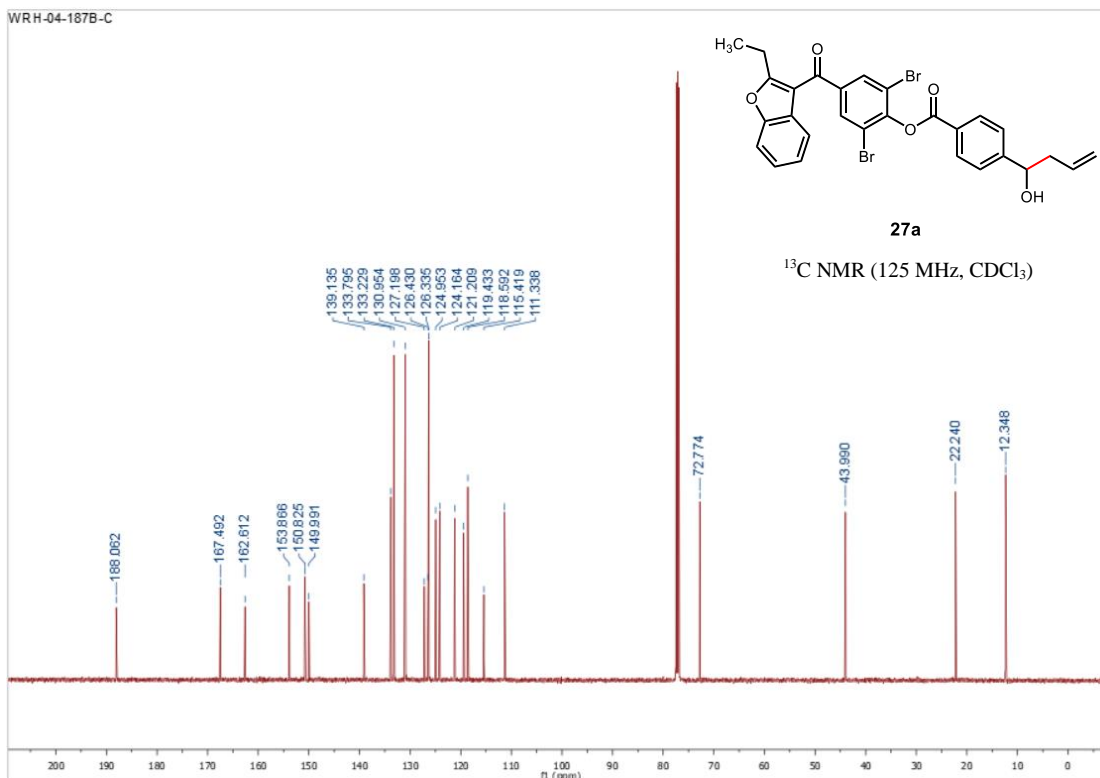

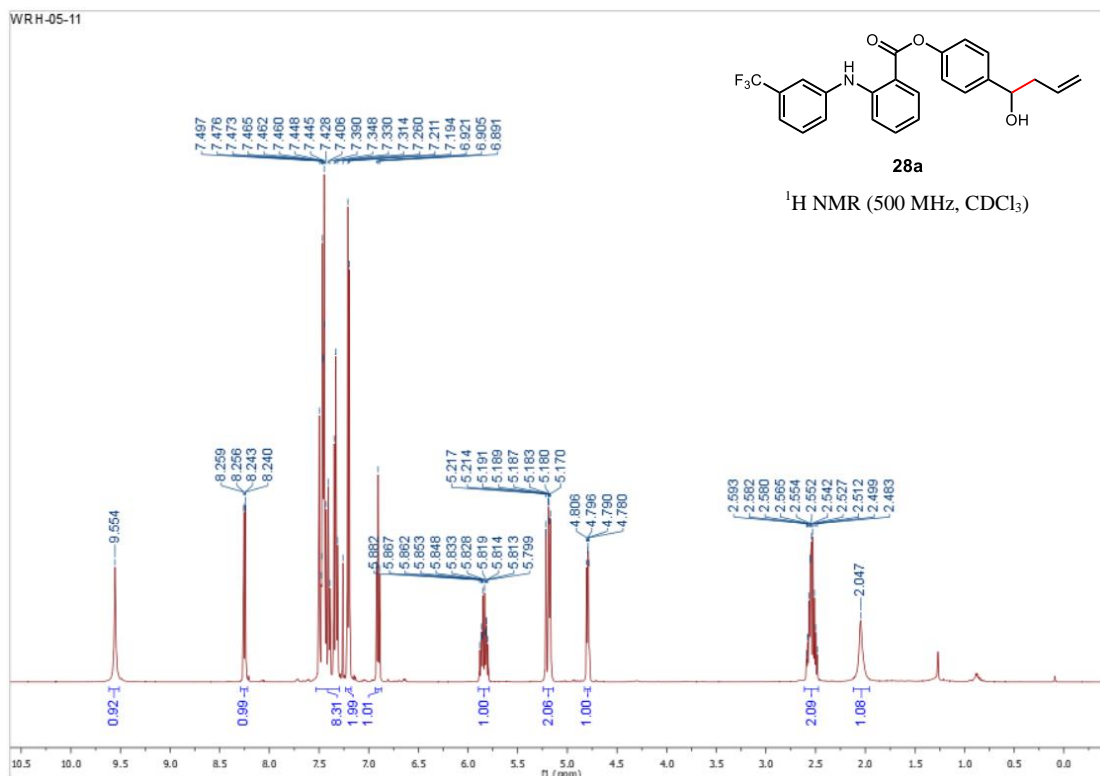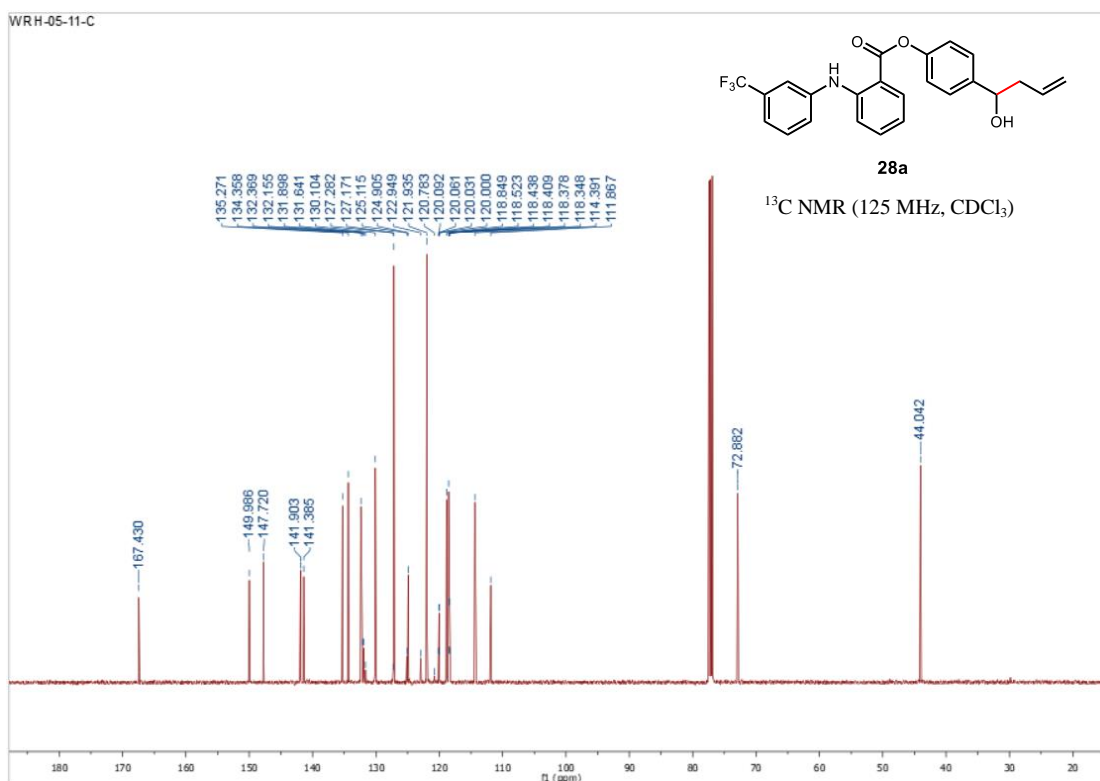



WRH-05-11-F

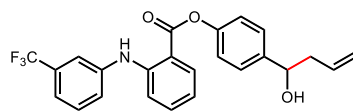

**28a**

$^{19}\text{F}$  NMR (376 MHz,  $\text{CDCl}_3$ )

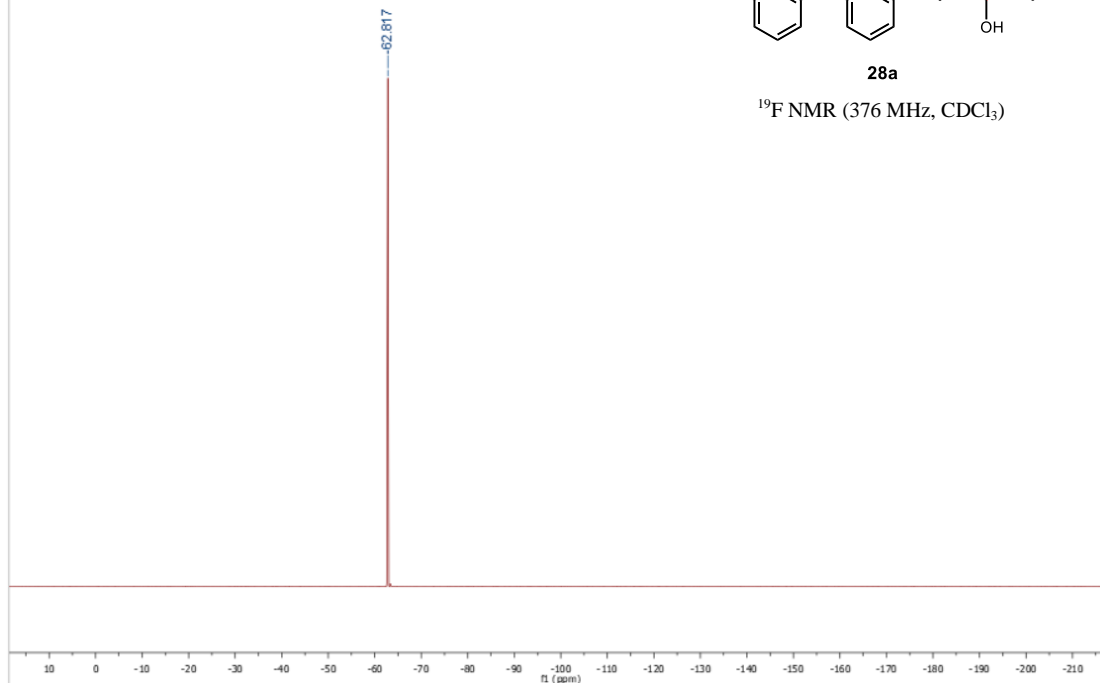

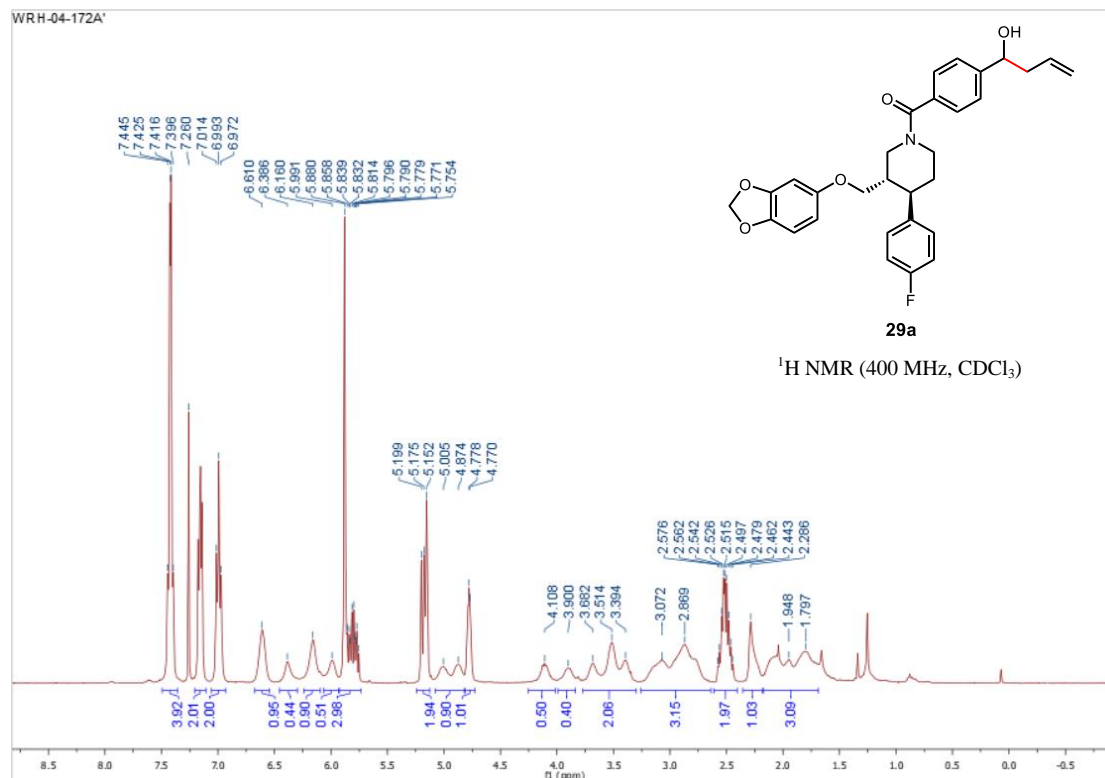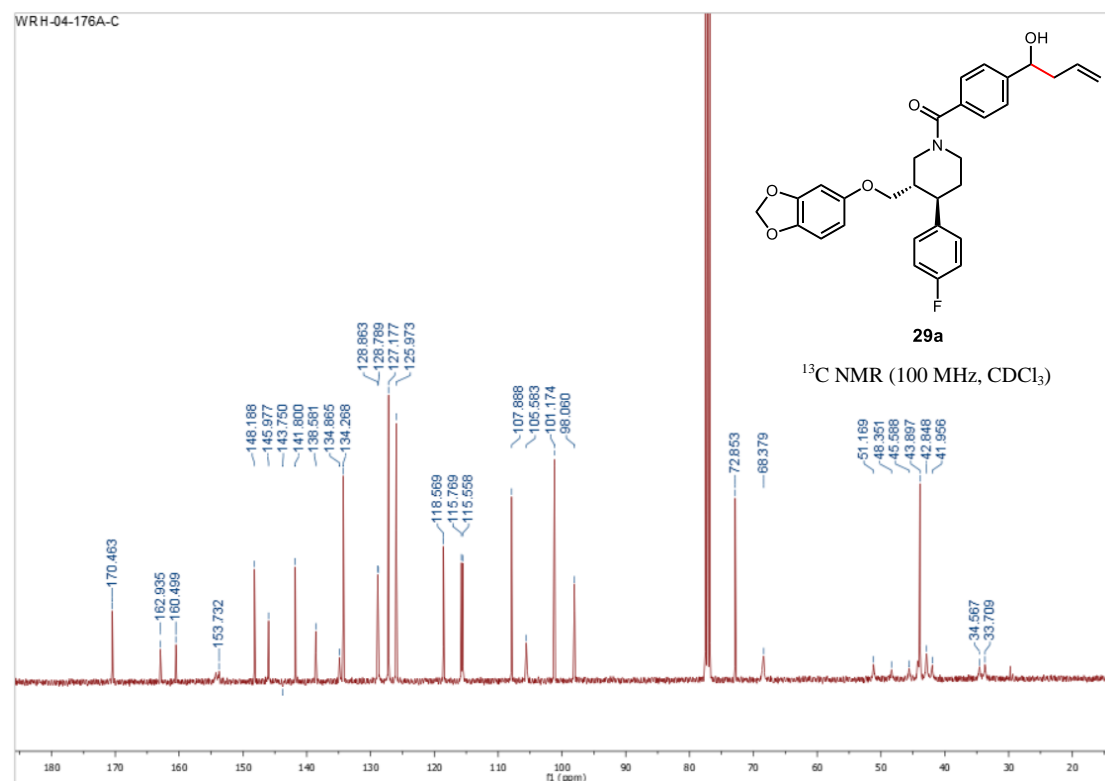

WRH-04-176A-F

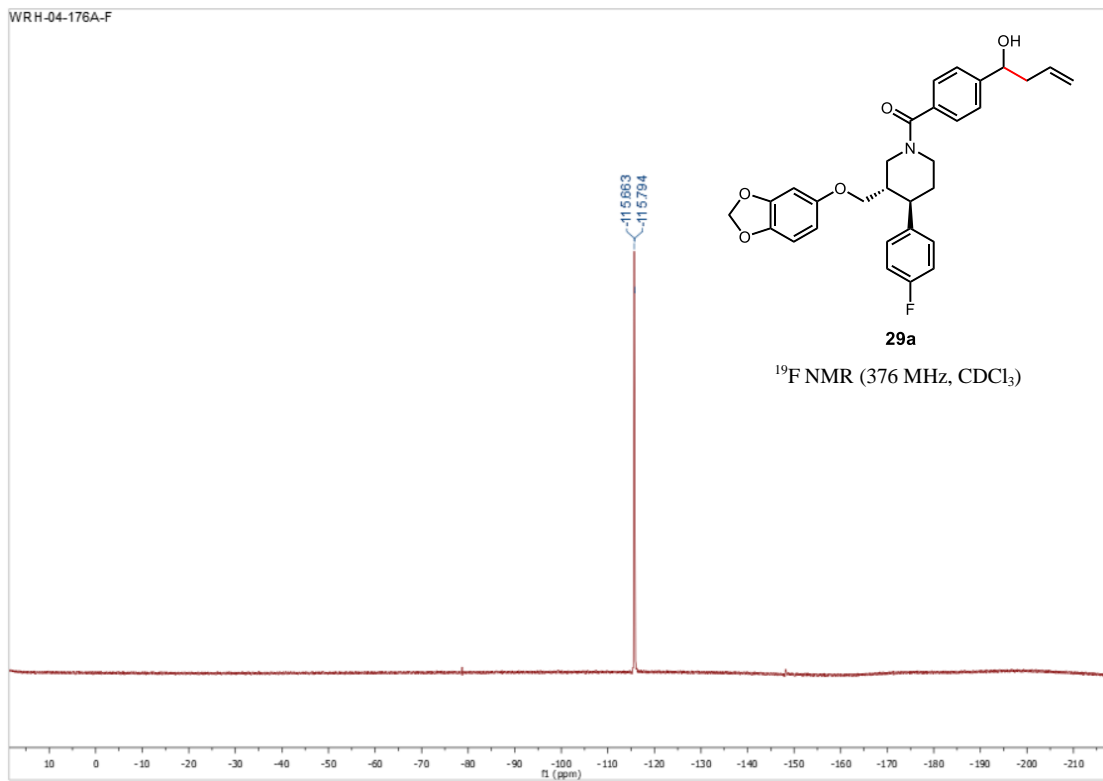

WRH-05-2B

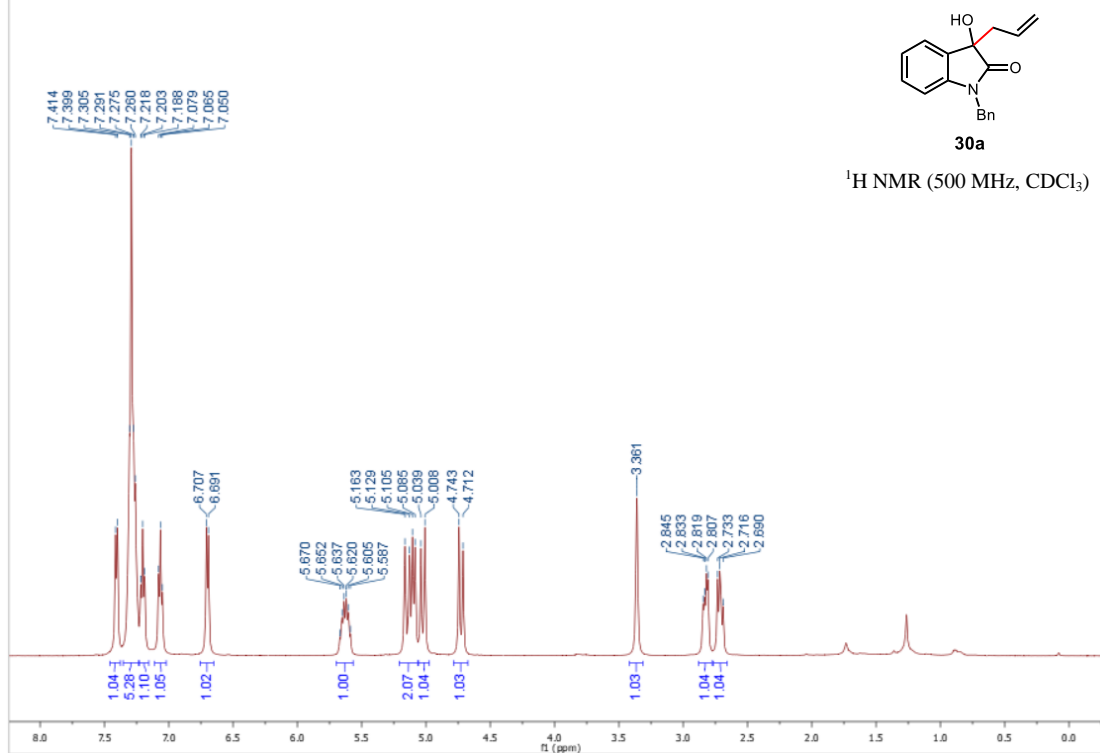

WRH-05-2B-C

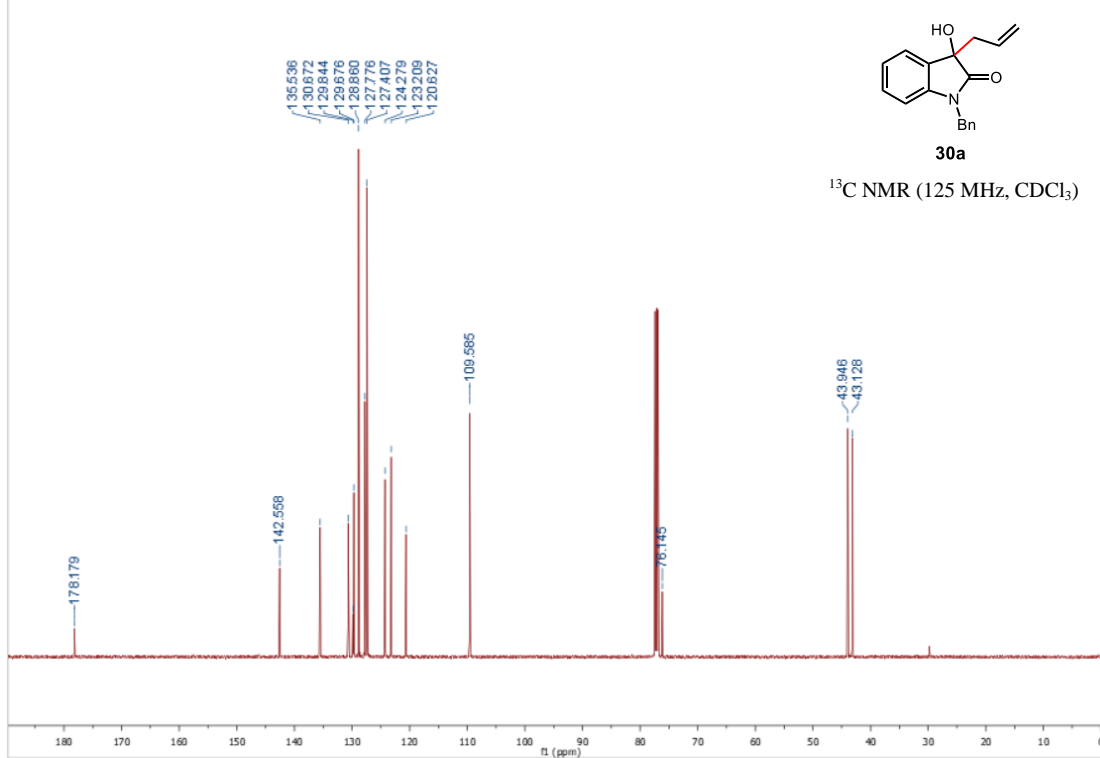

WRH-04-191B

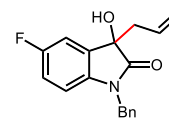

31a

<sup>1</sup>H NMR (500 MHz, CDCl<sub>3</sub>)

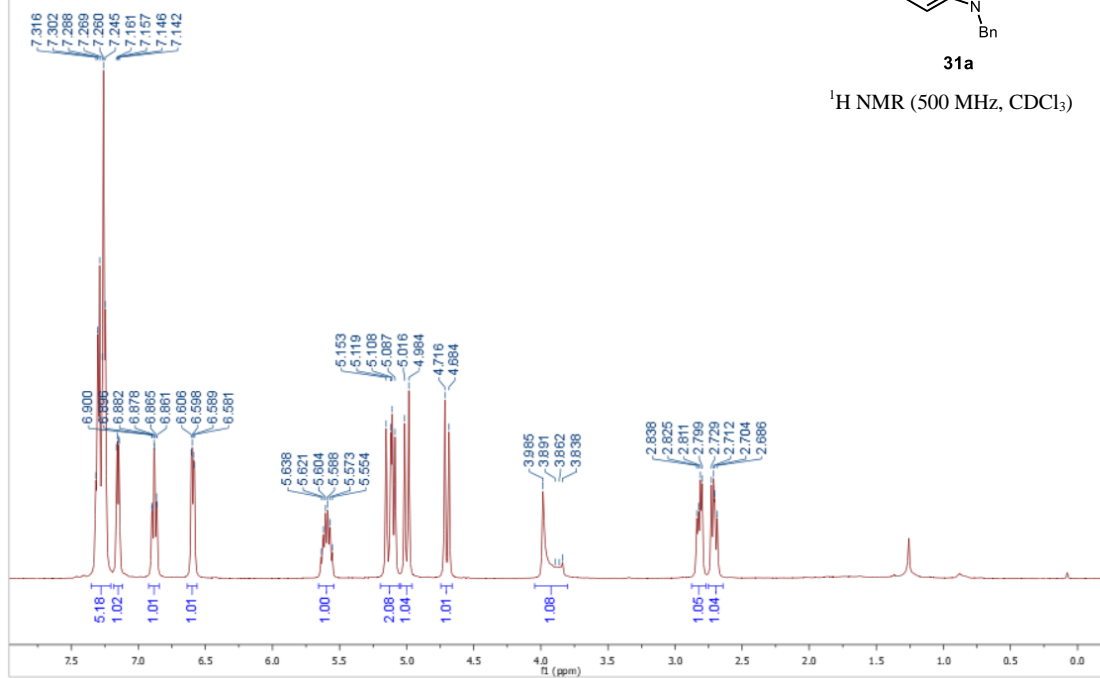

WRH-04-191B-C

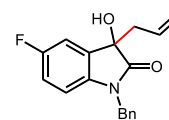

31a

<sup>13</sup>C NMR (125 MHz, CDCl<sub>3</sub>)

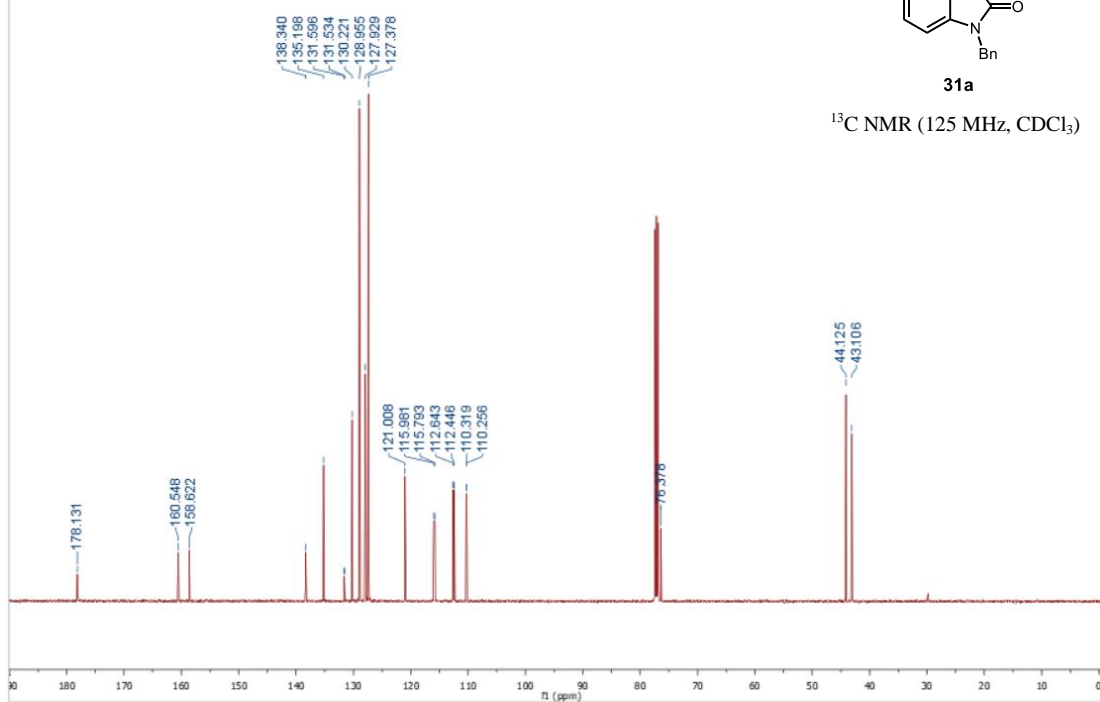

WRH-04-191B-F

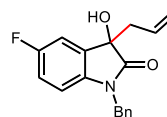

**31a**

$^{19}\text{F}$  NMR (470 MHz,  $\text{CDCl}_3$ )

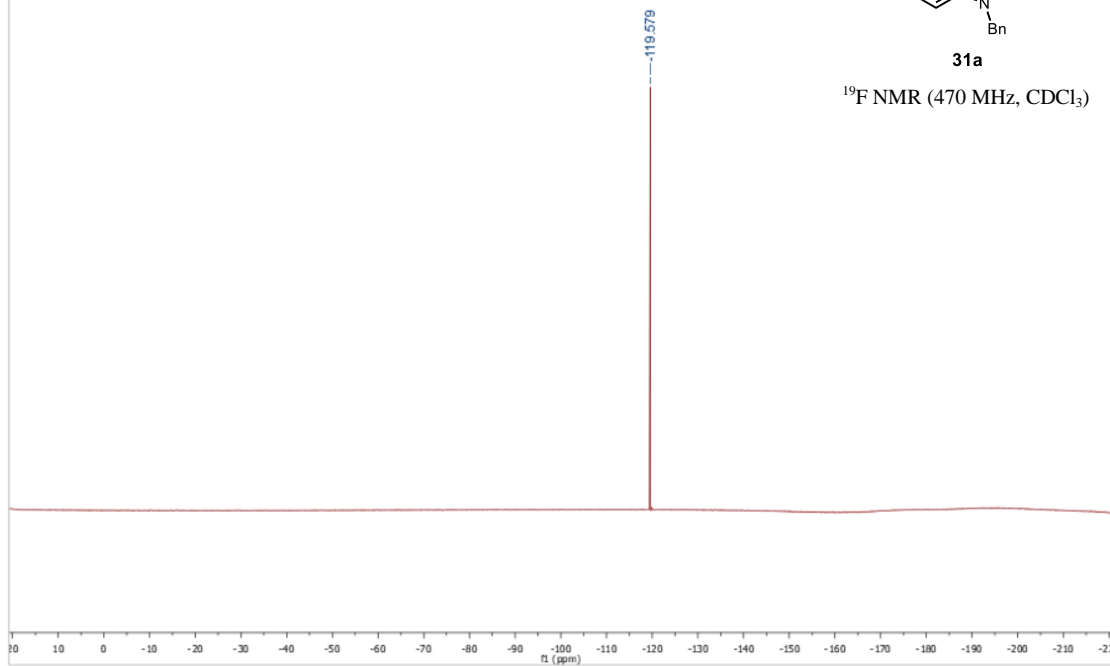

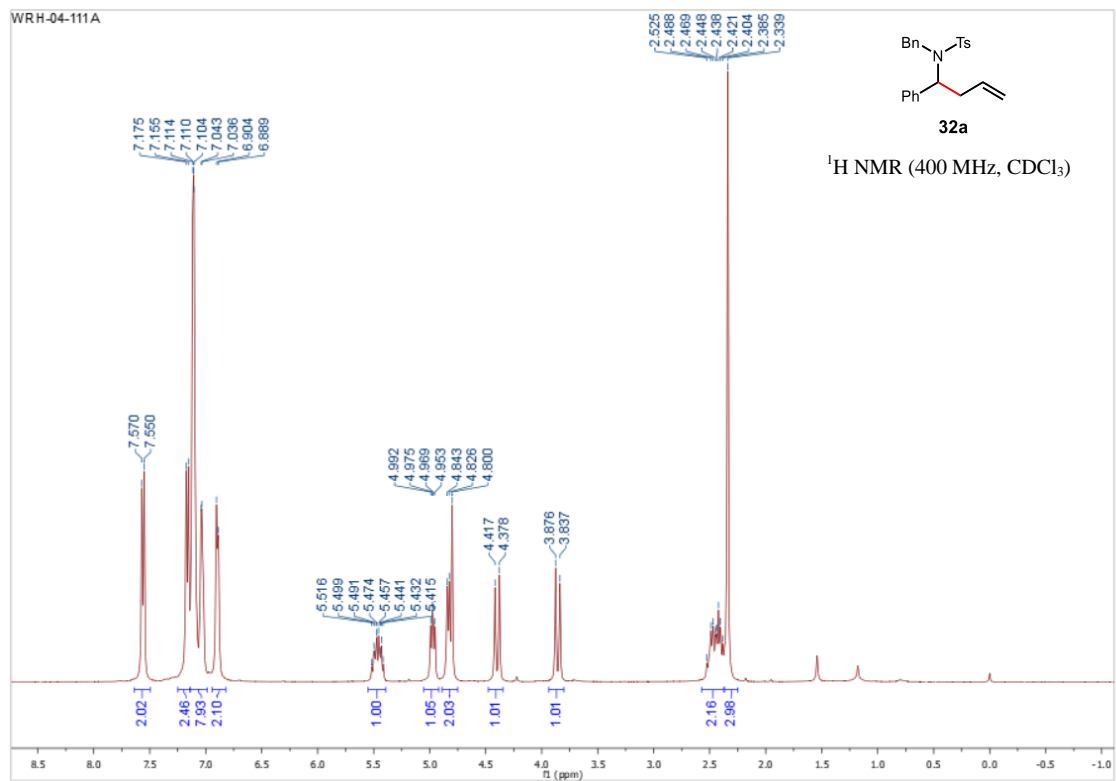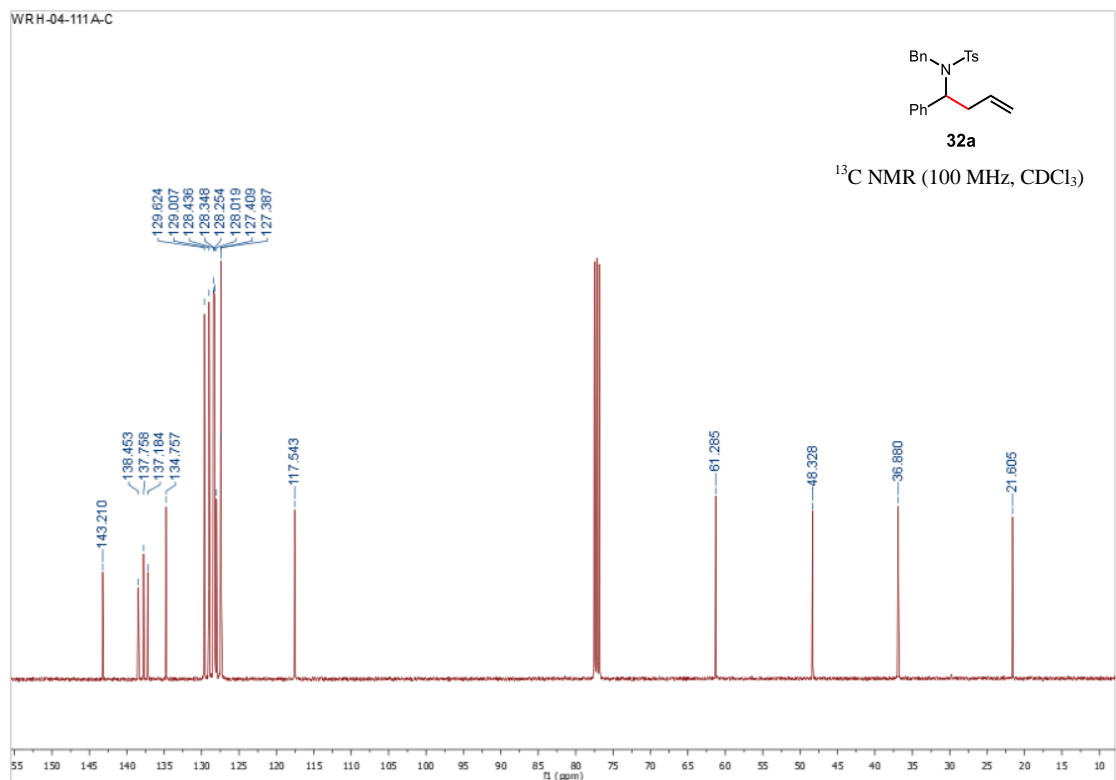

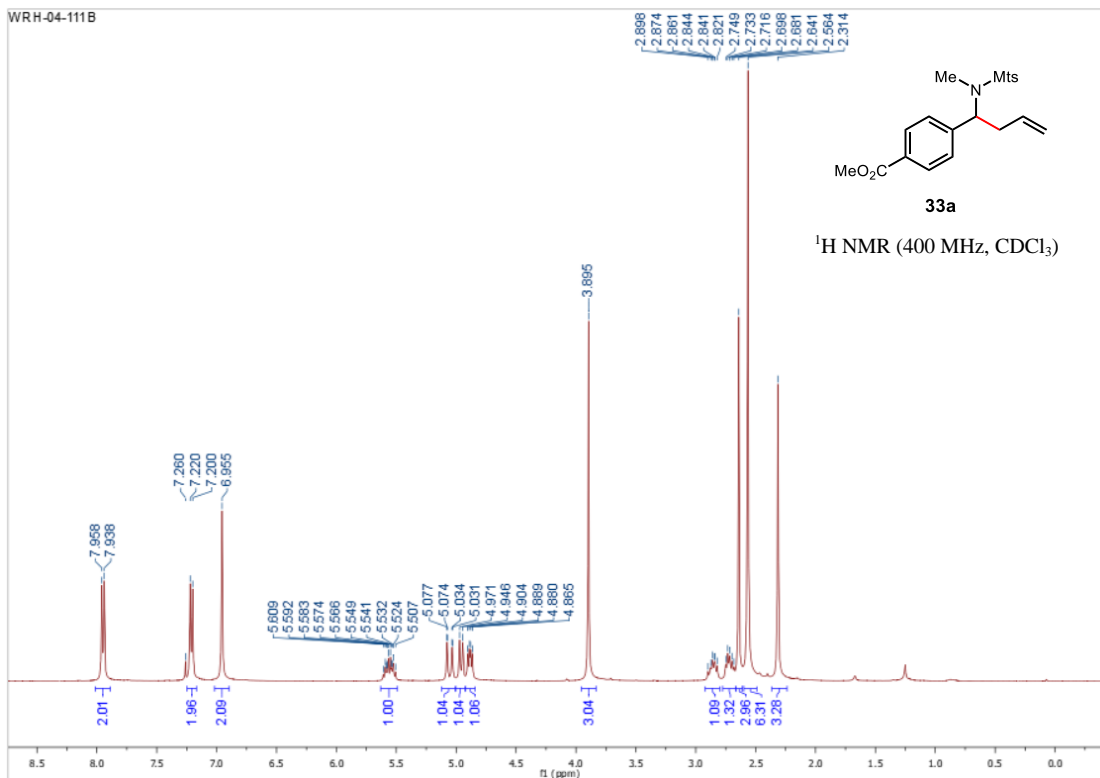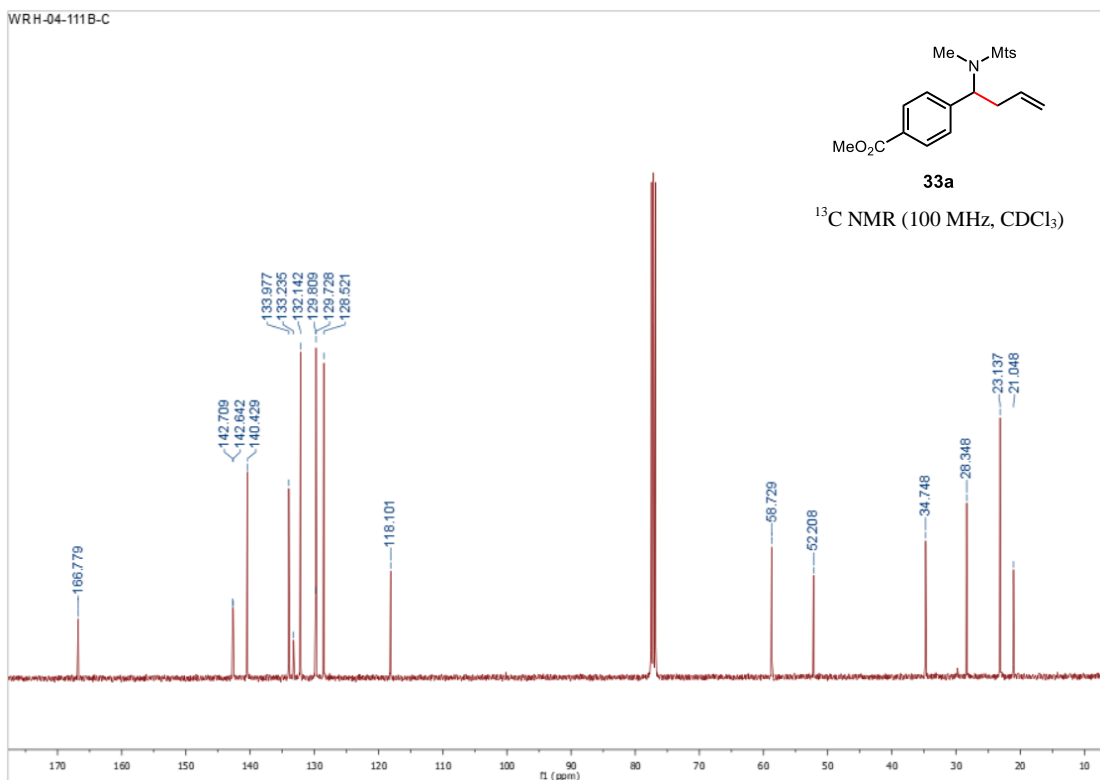



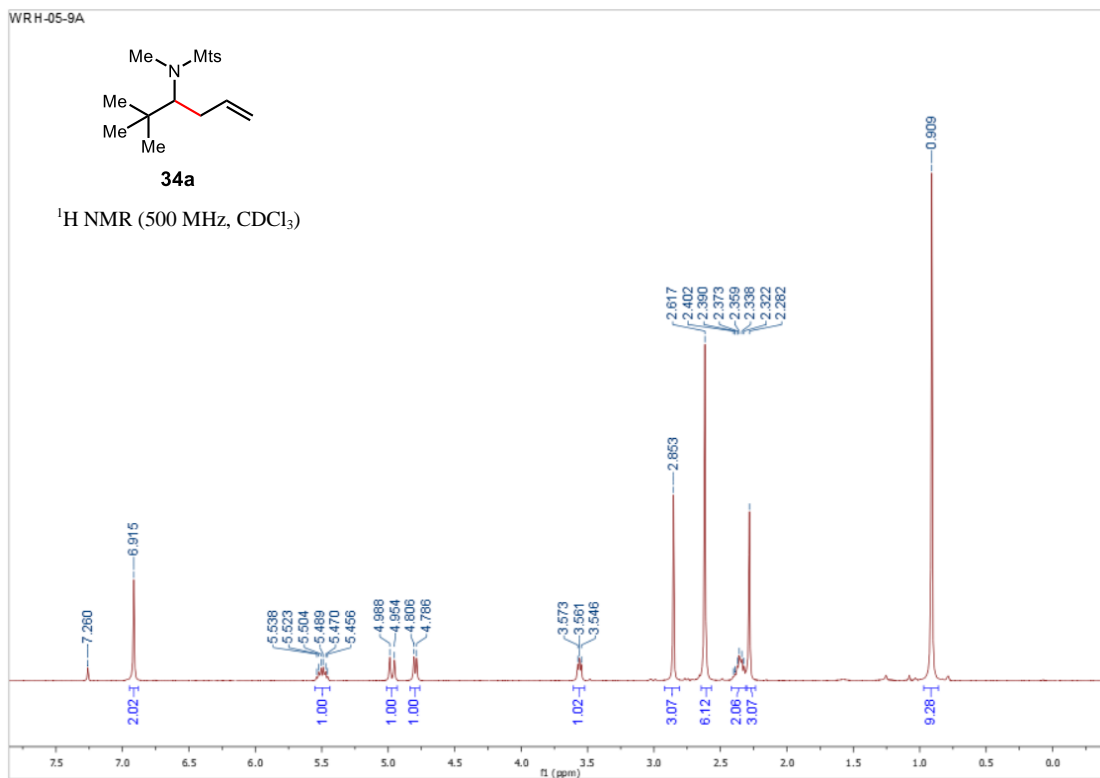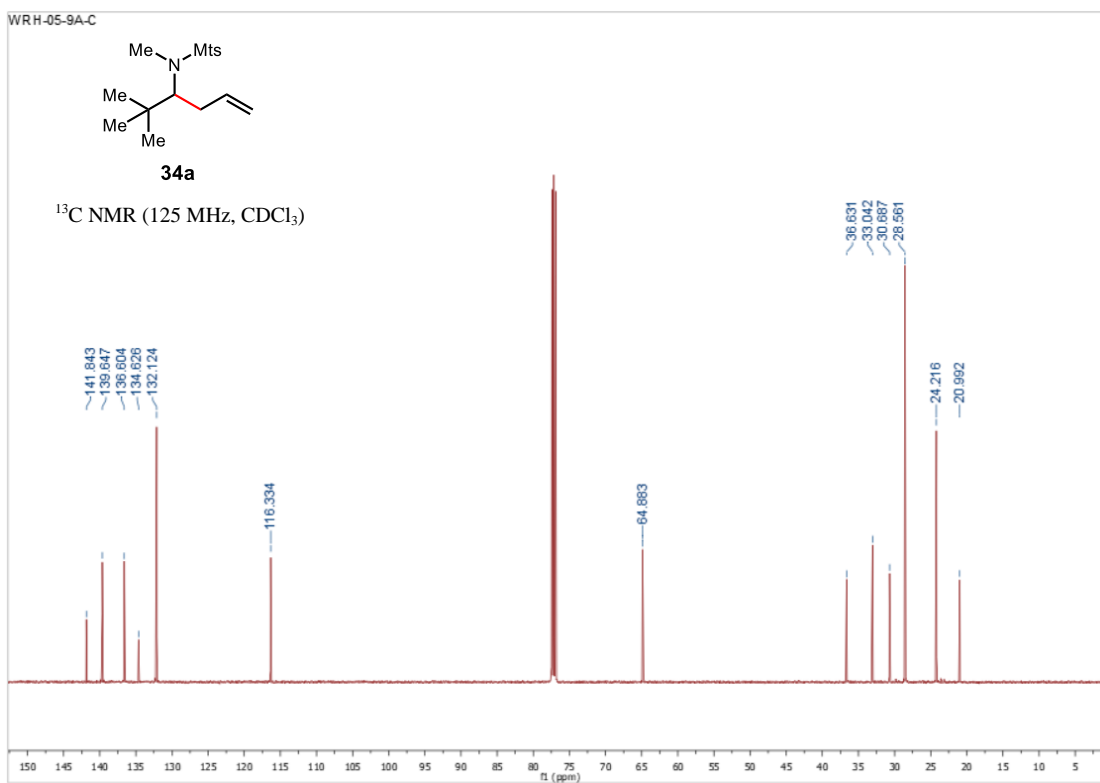

WRH-05-123A-1

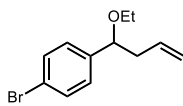

**35a**

$^1\text{H NMR}$  (500 MHz,  $\text{CDCl}_3$ )

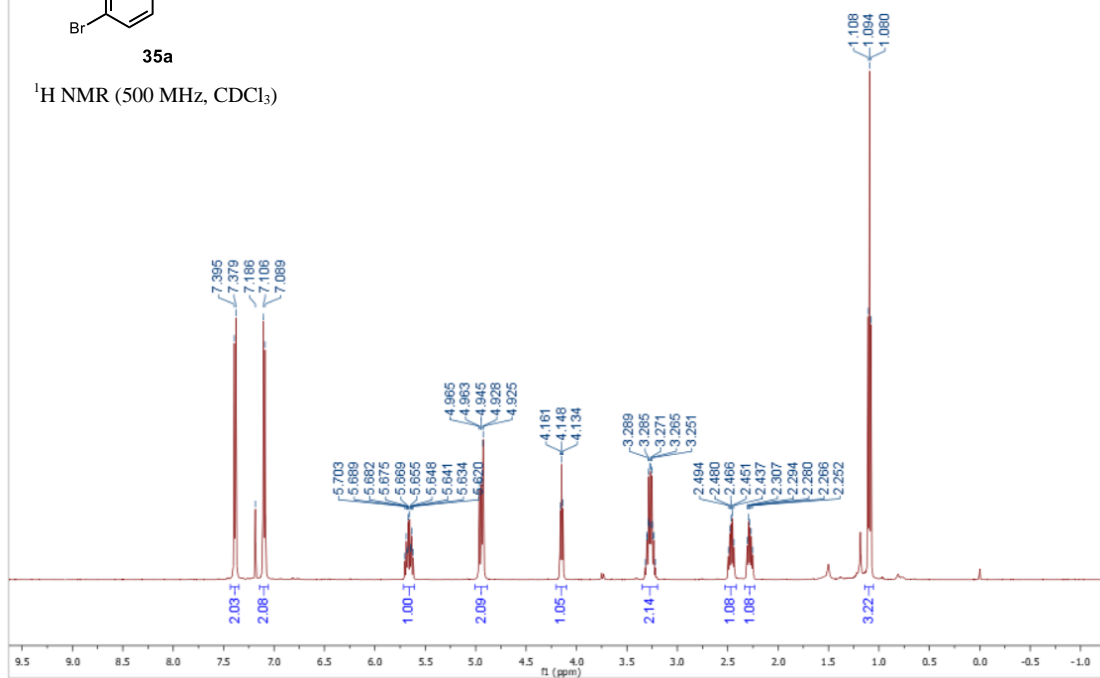

WRH-05-123A-C

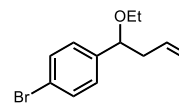

**35a**

$^{13}\text{C NMR}$  (125 MHz,  $\text{CDCl}_3$ )

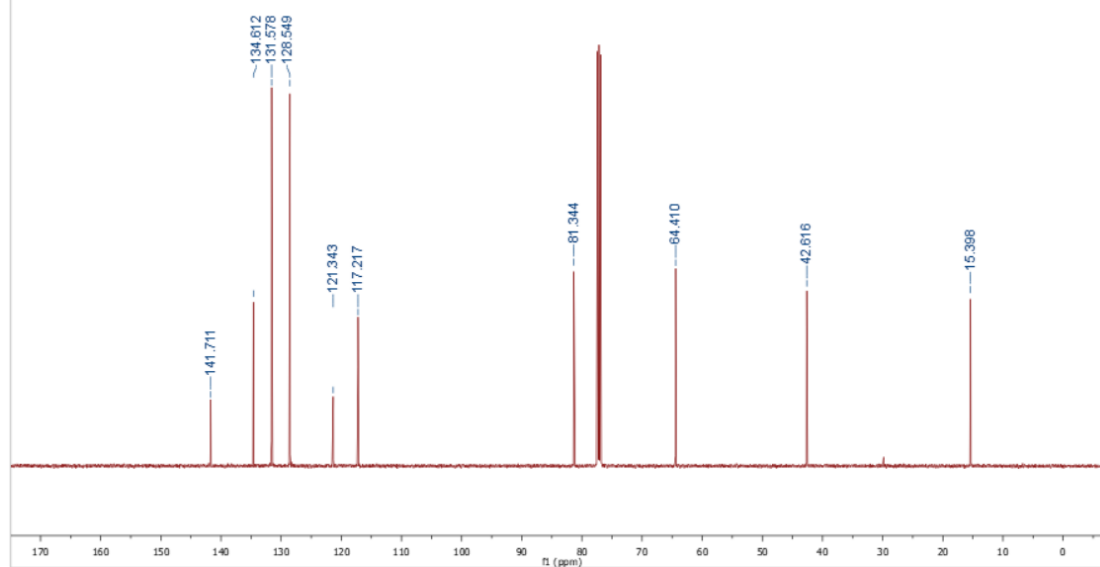

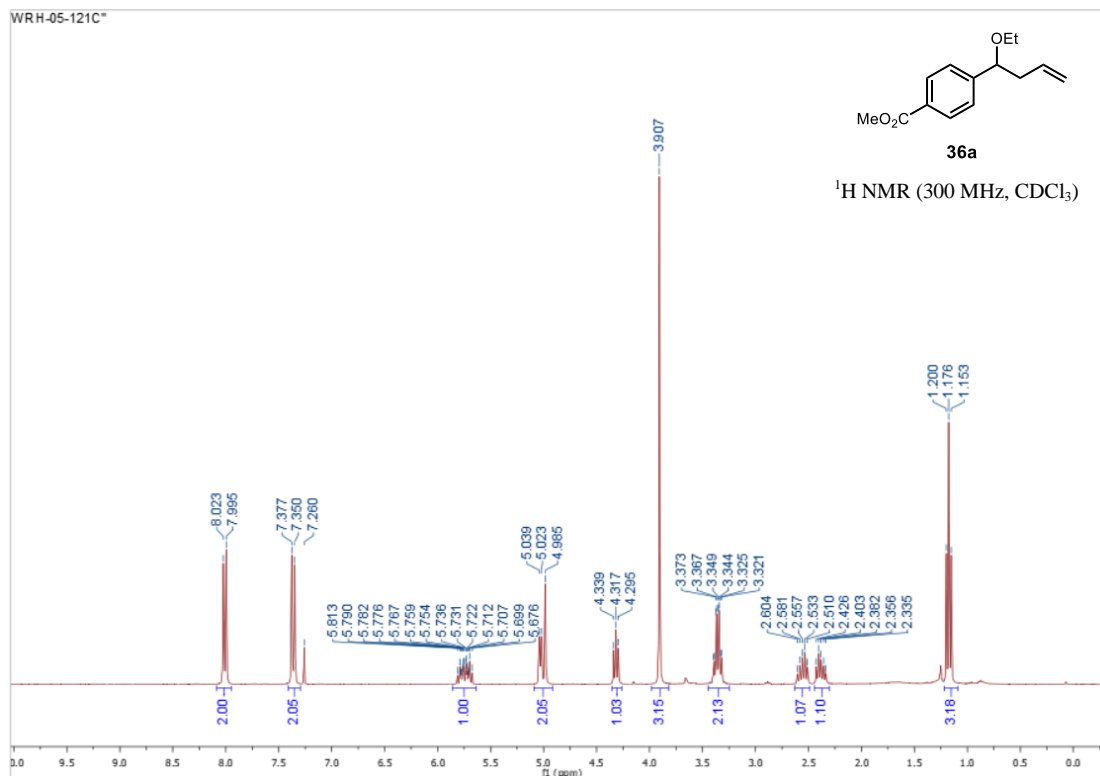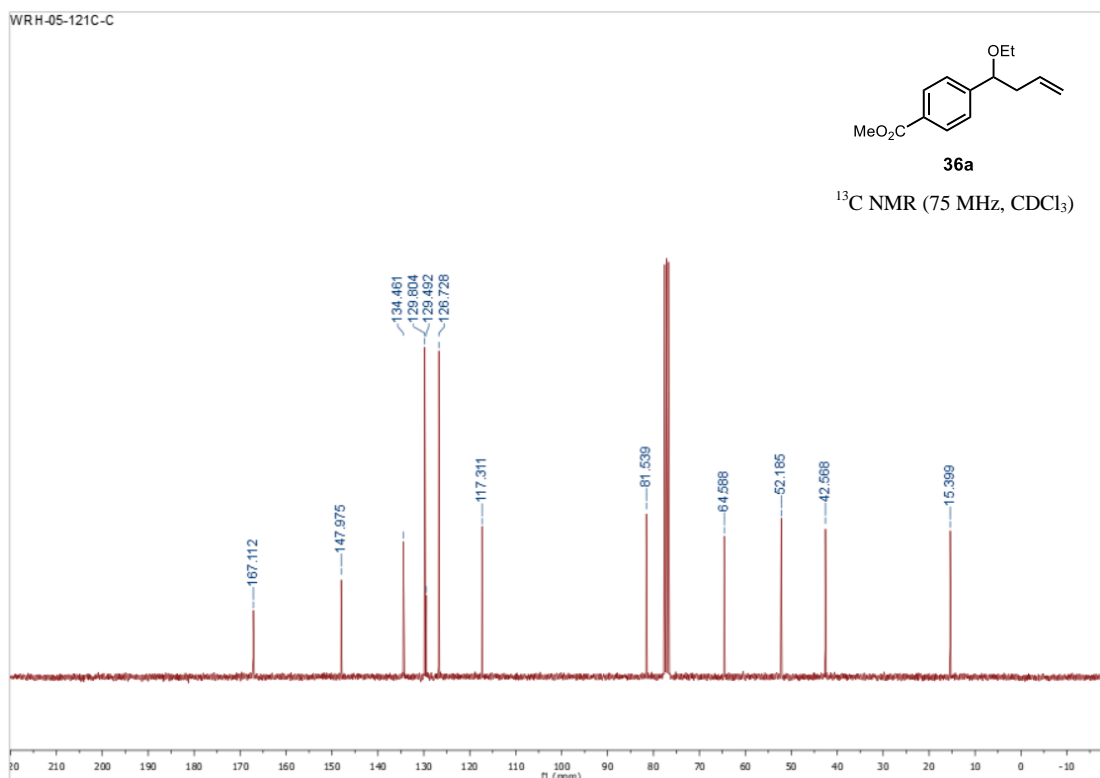

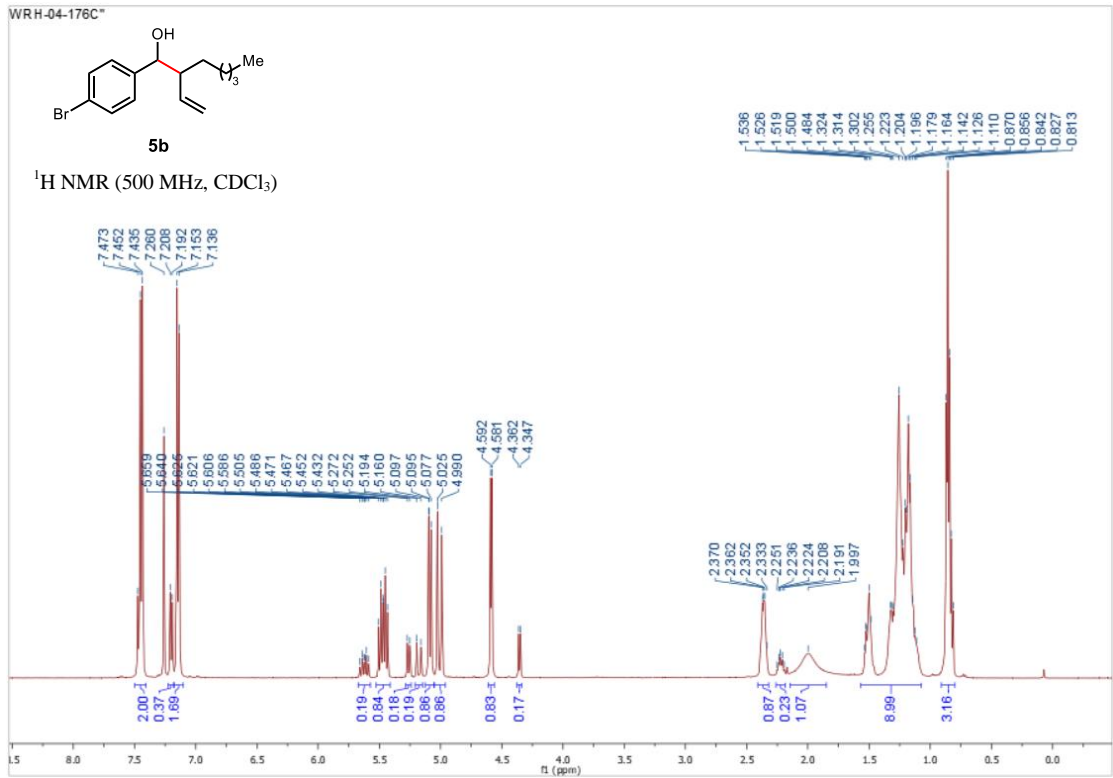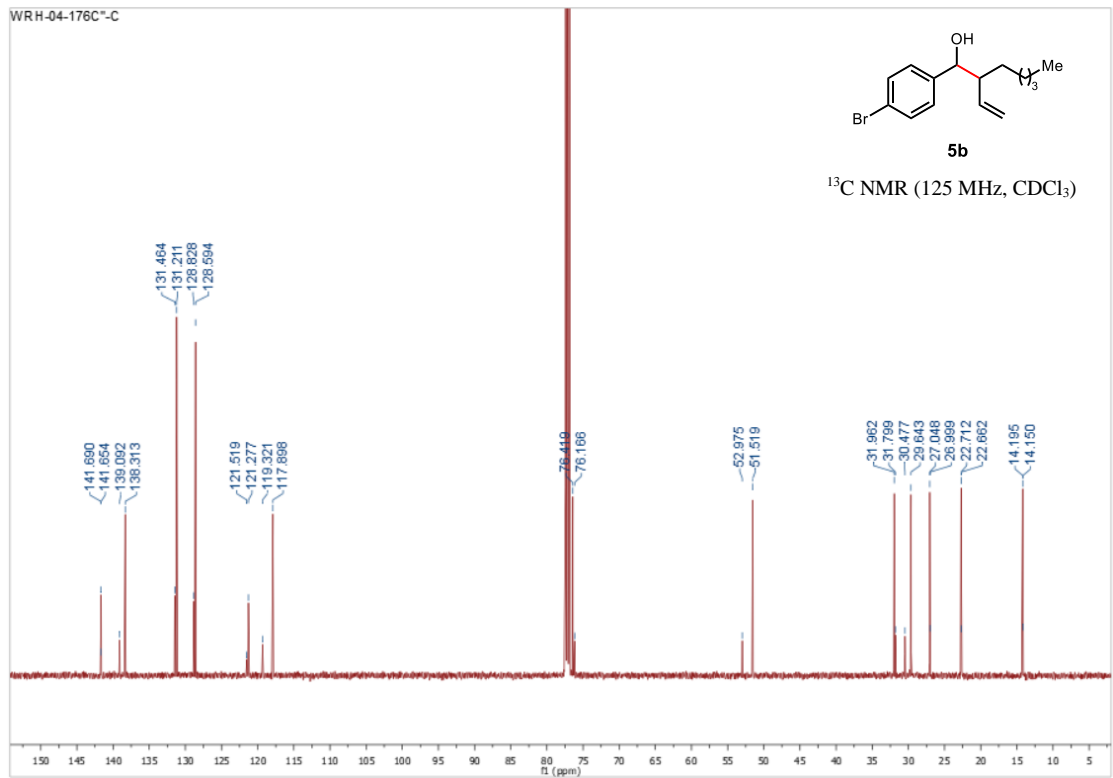

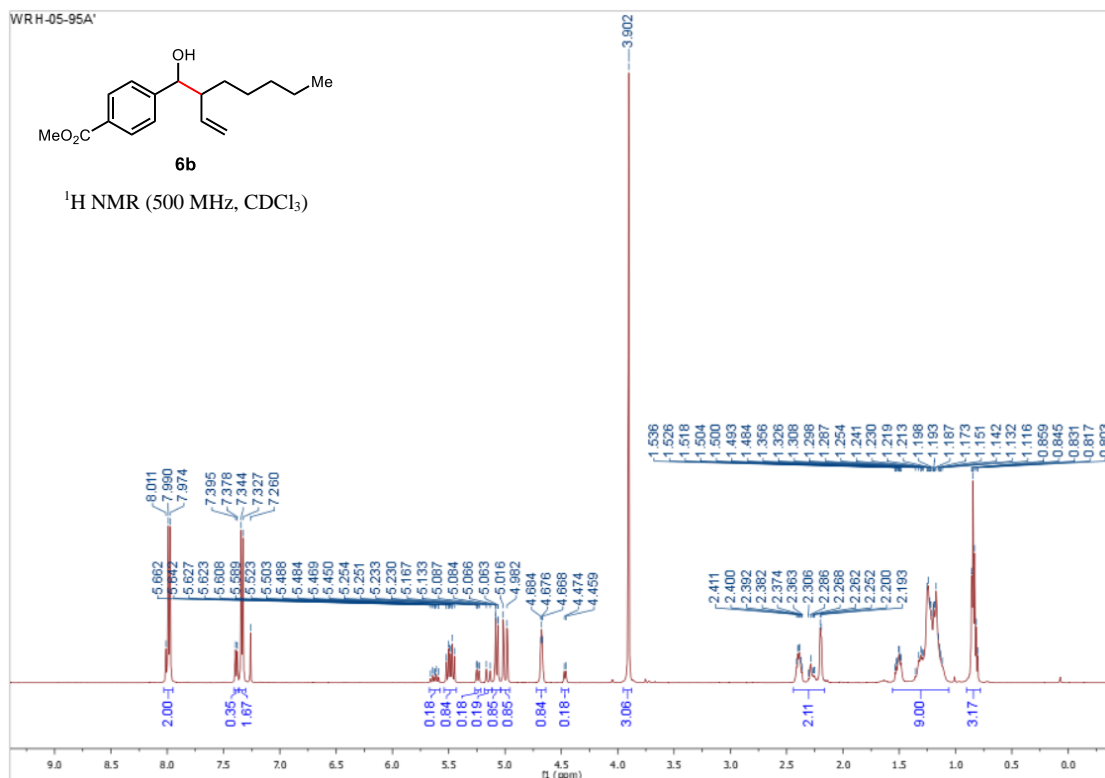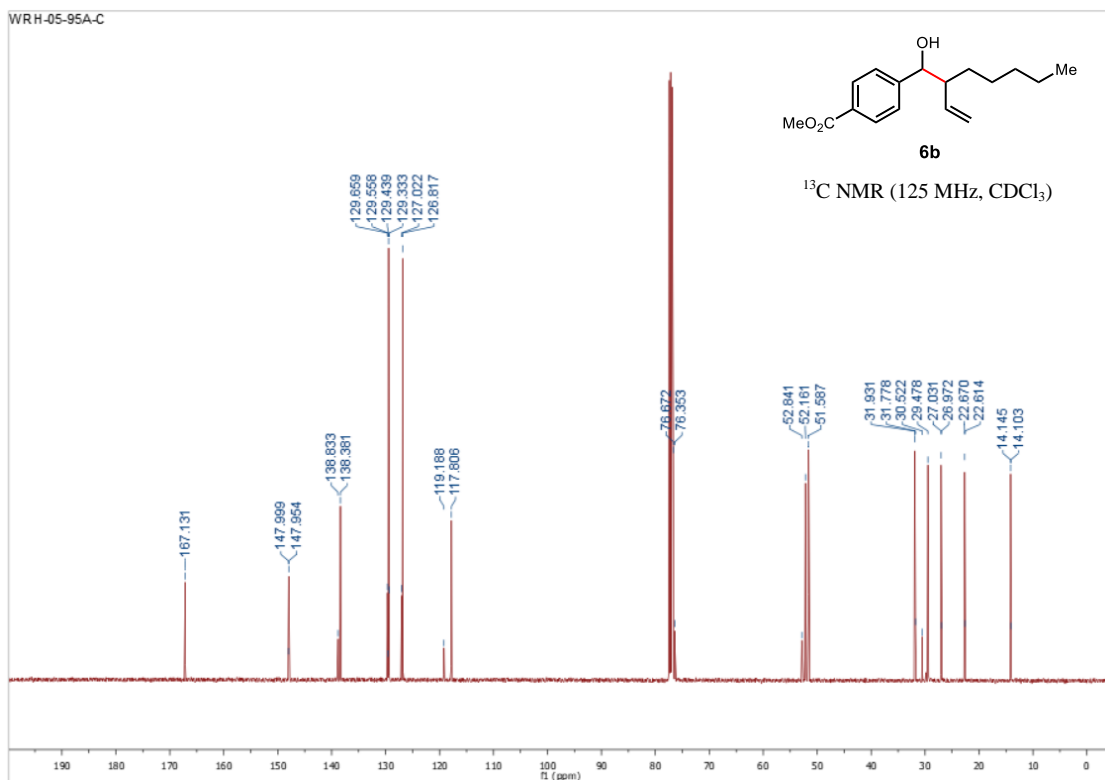

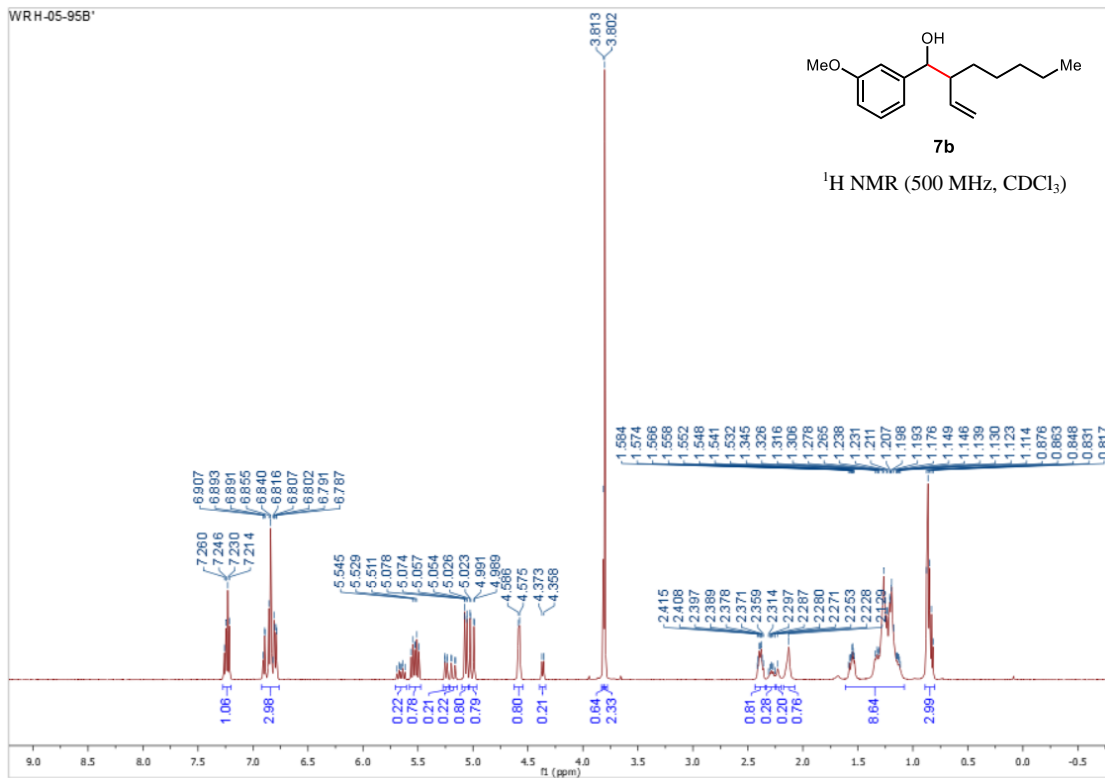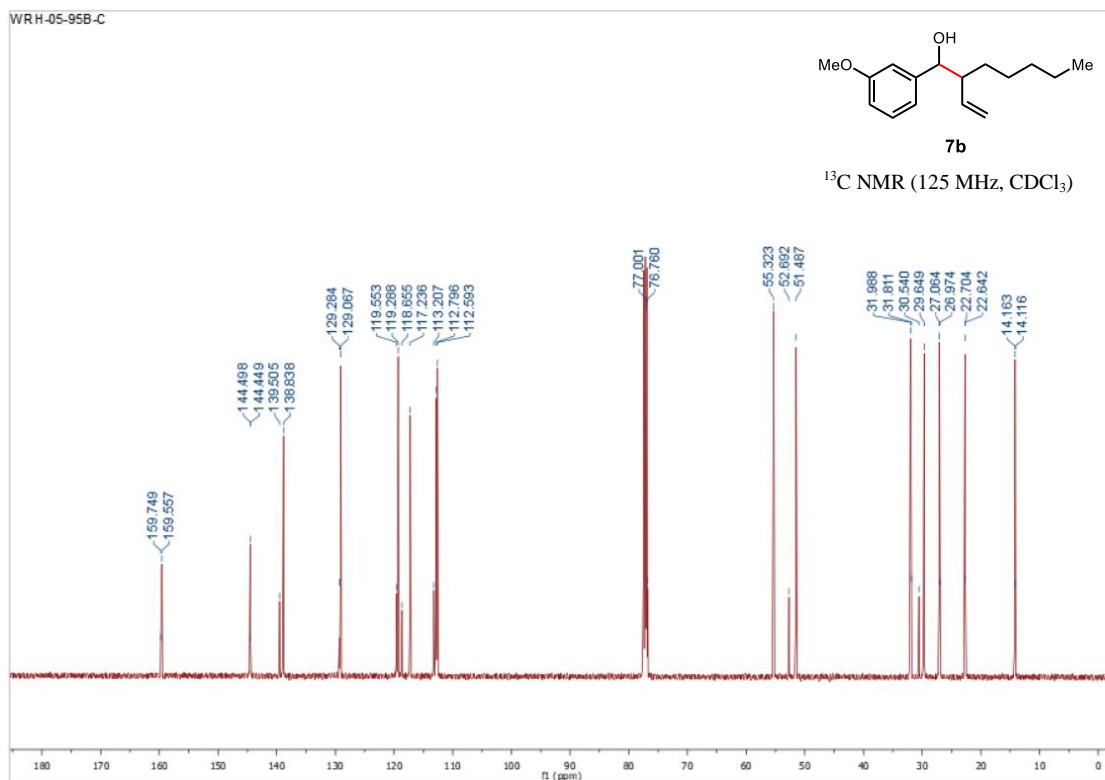

wyd-6-170 H 500  
wyd-6-170 H 500

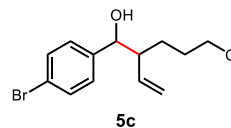

<sup>1</sup>H NMR (500 MHz, CDCl<sub>3</sub>)

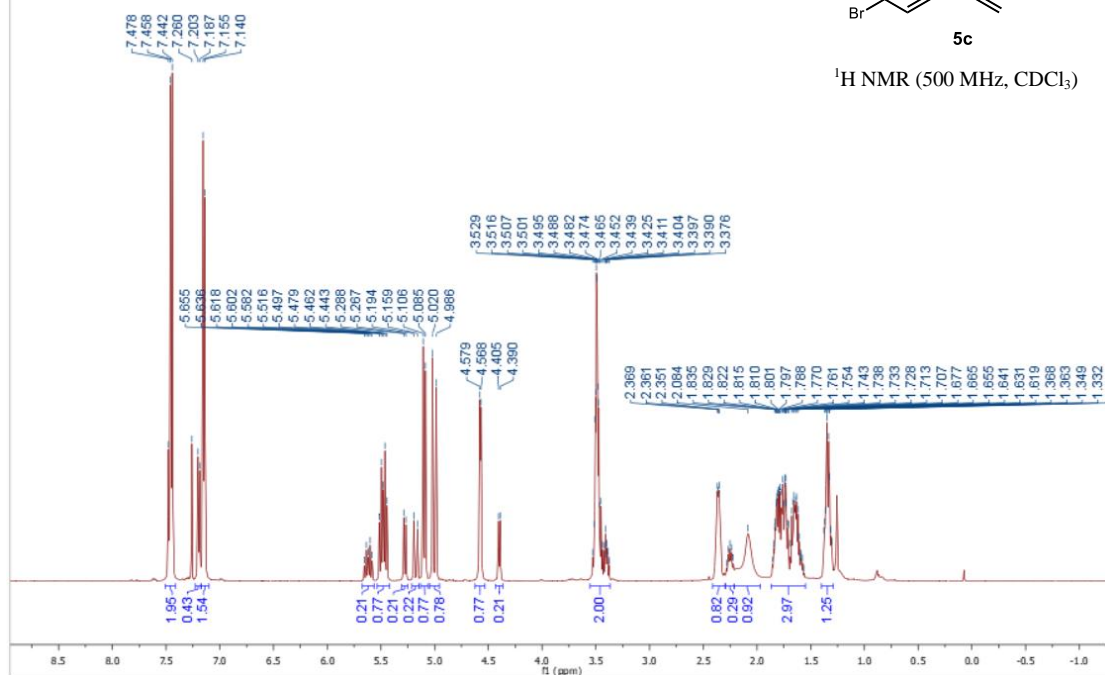

wyd-6-170 C 500  
wyd-6-170 C 500

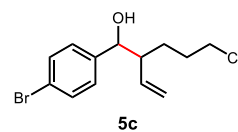

<sup>13</sup>C NMR (125 MHz, CDCl<sub>3</sub>)

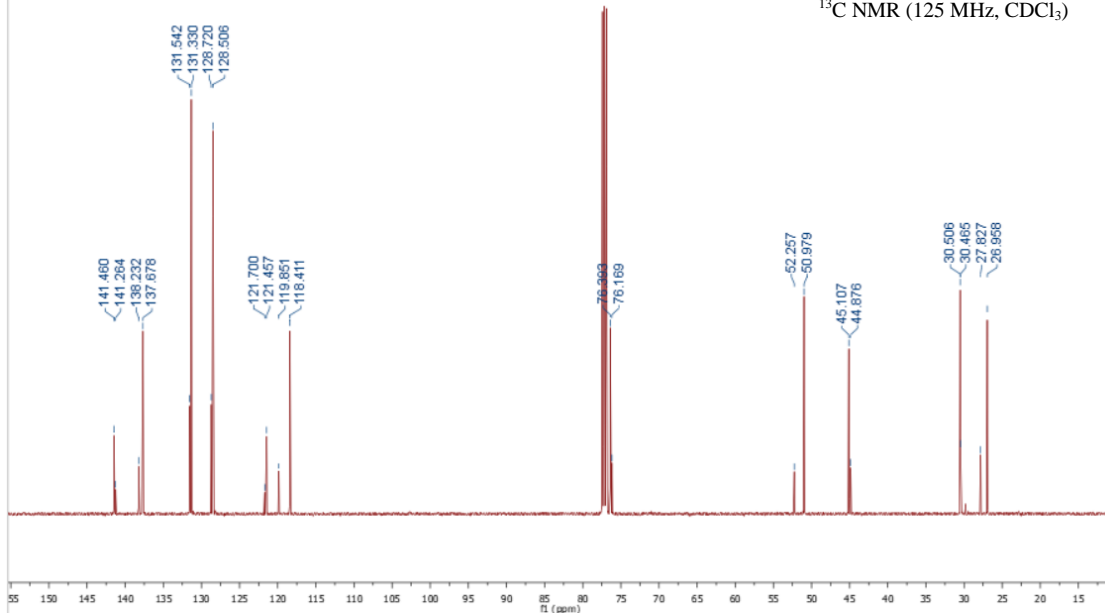

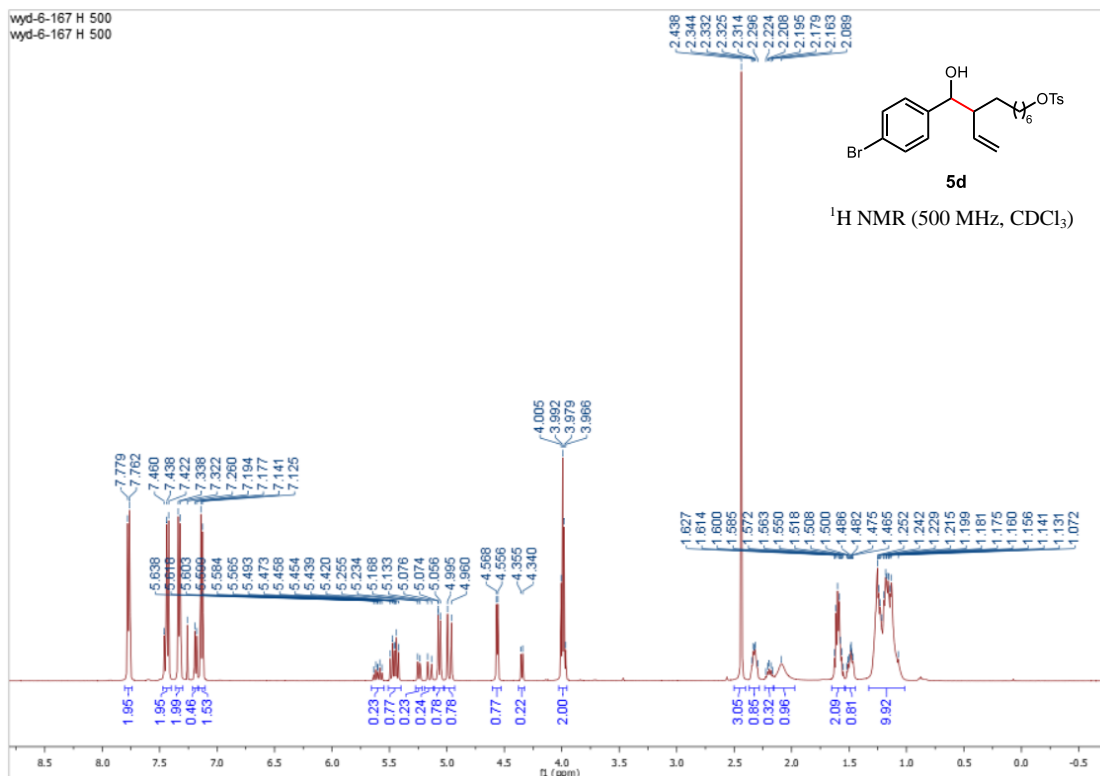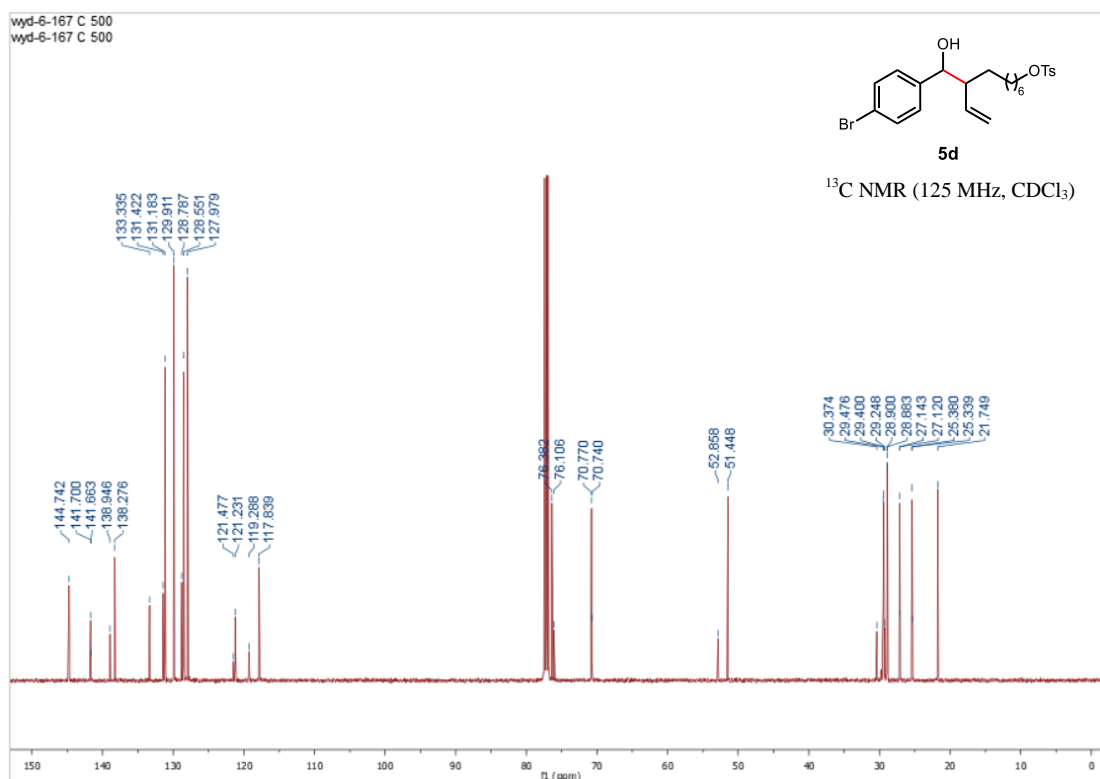



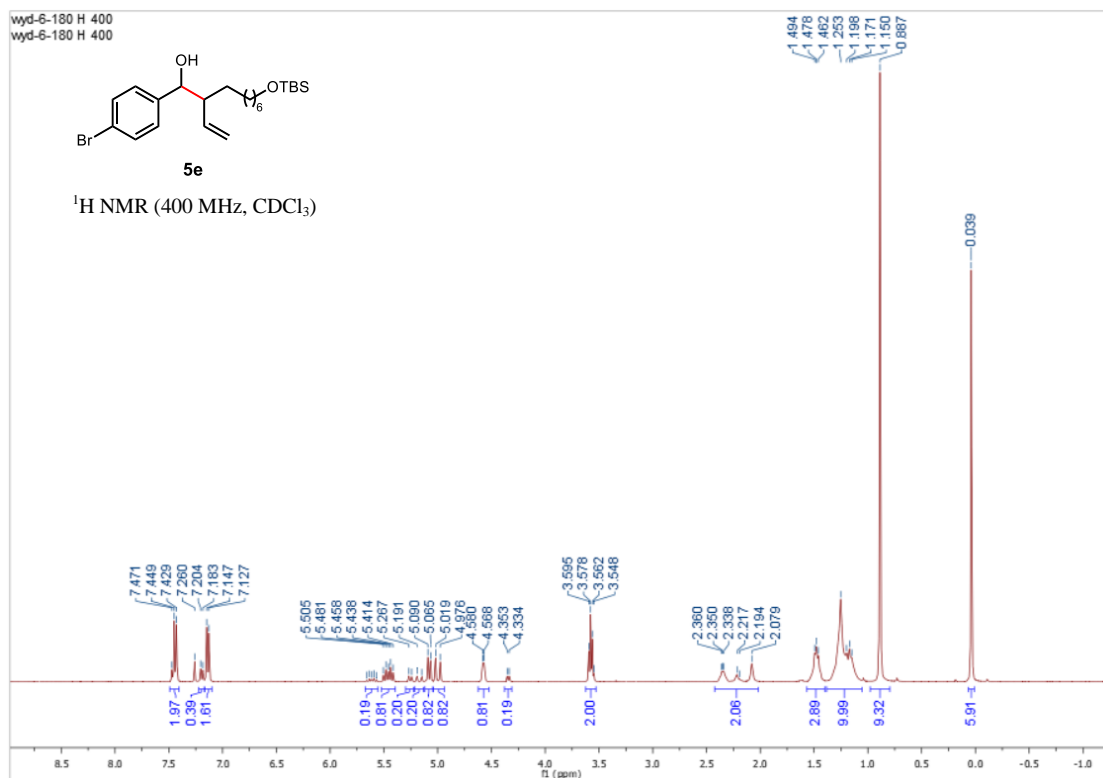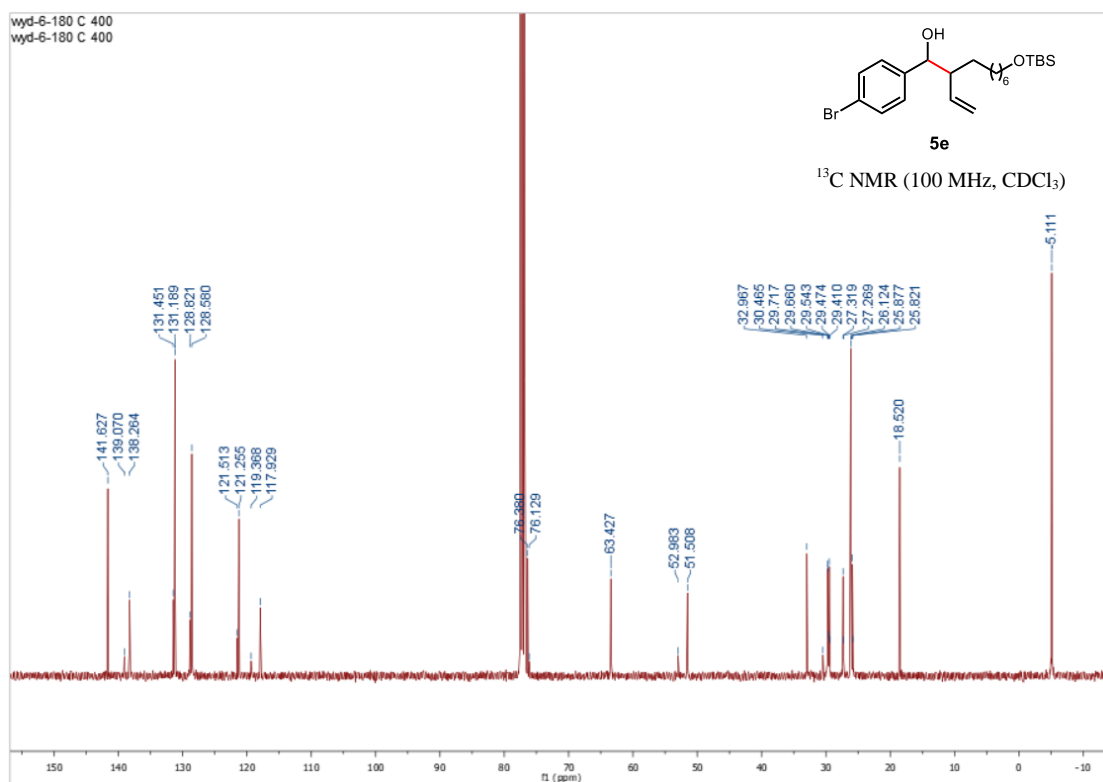

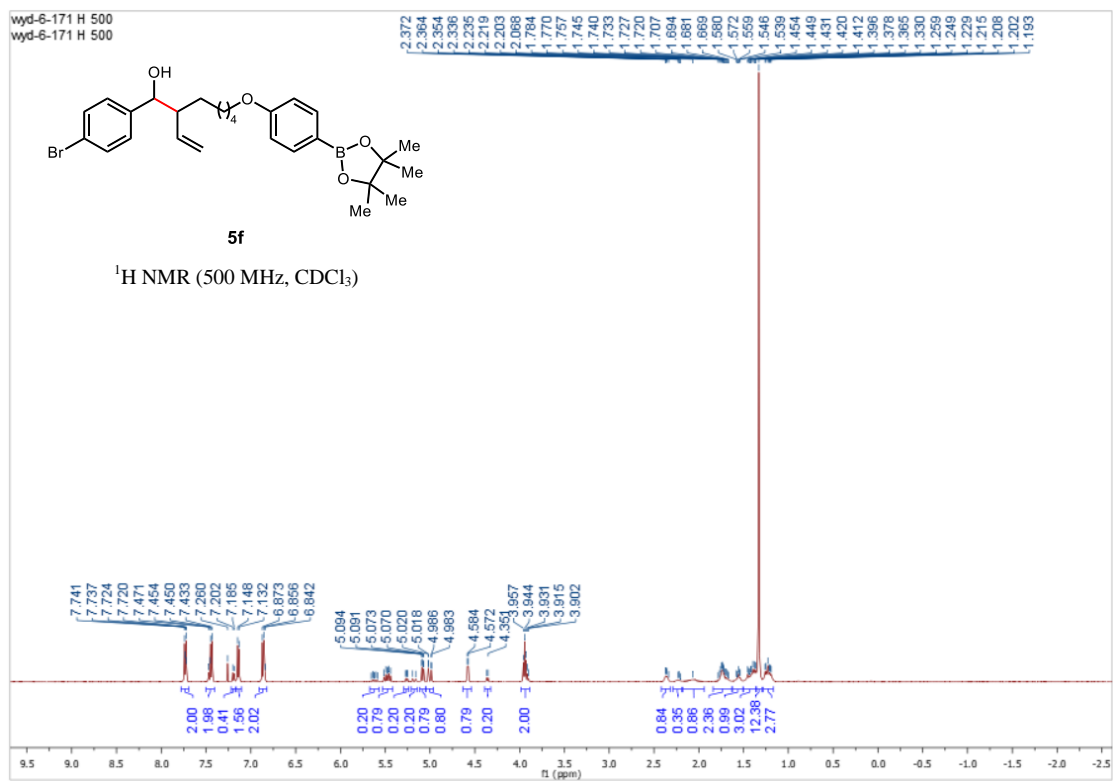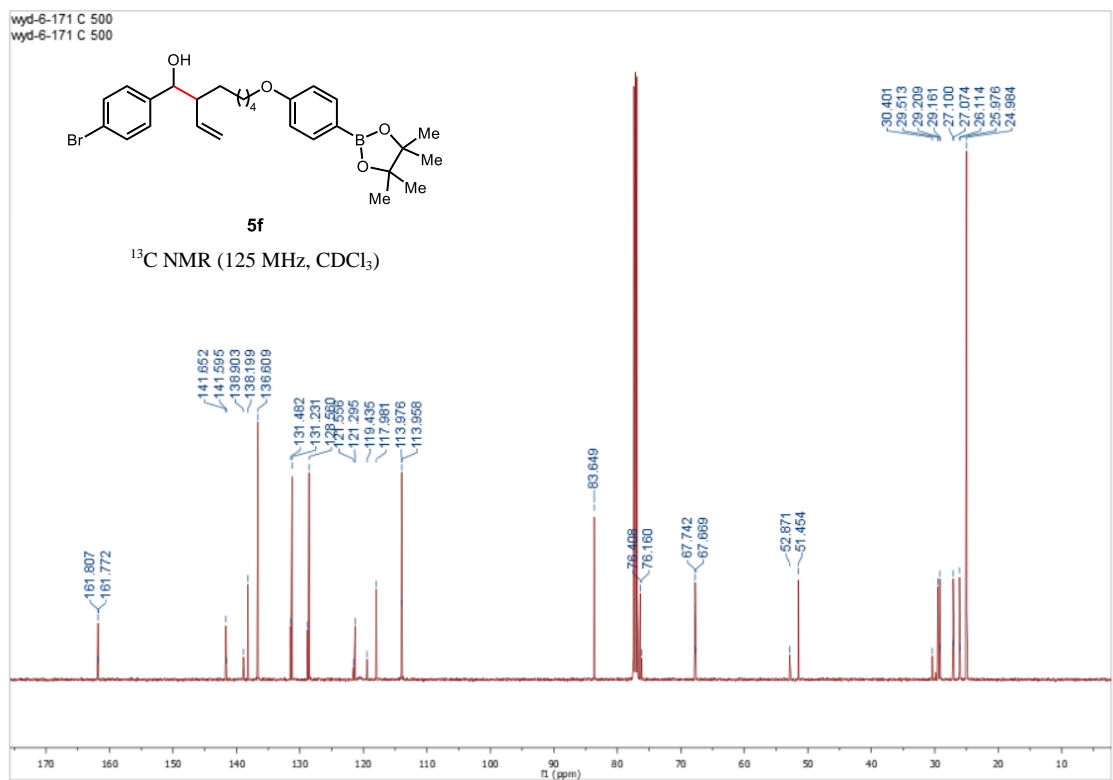

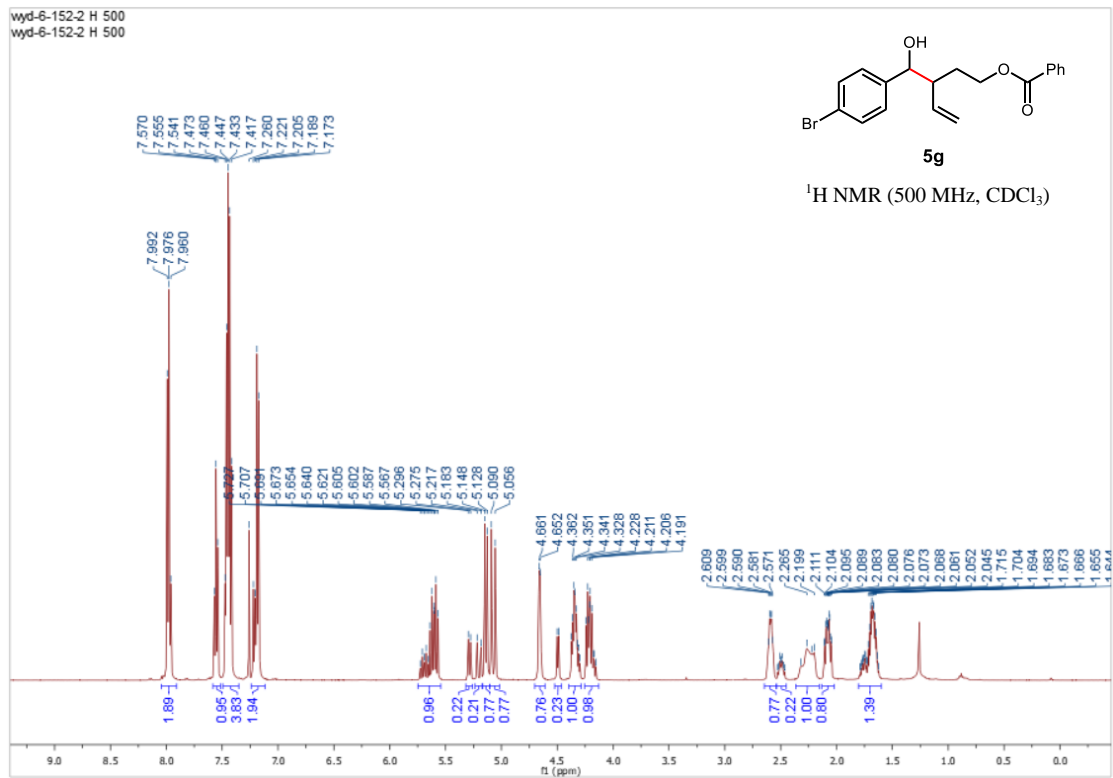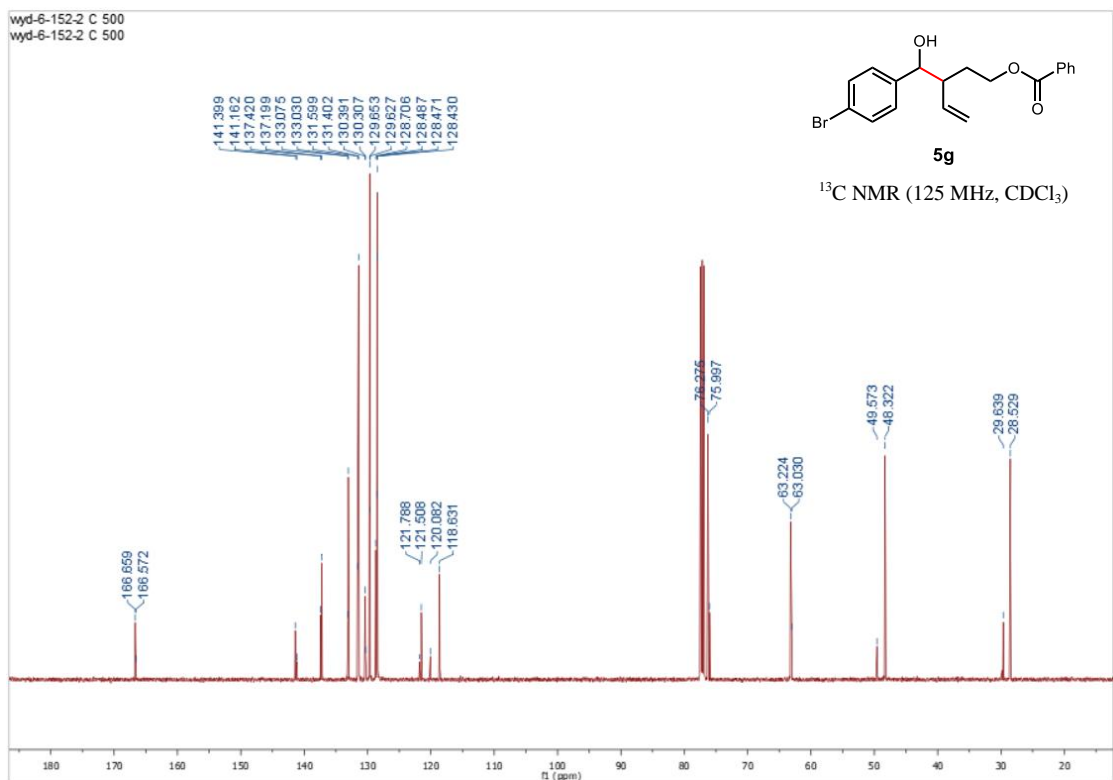

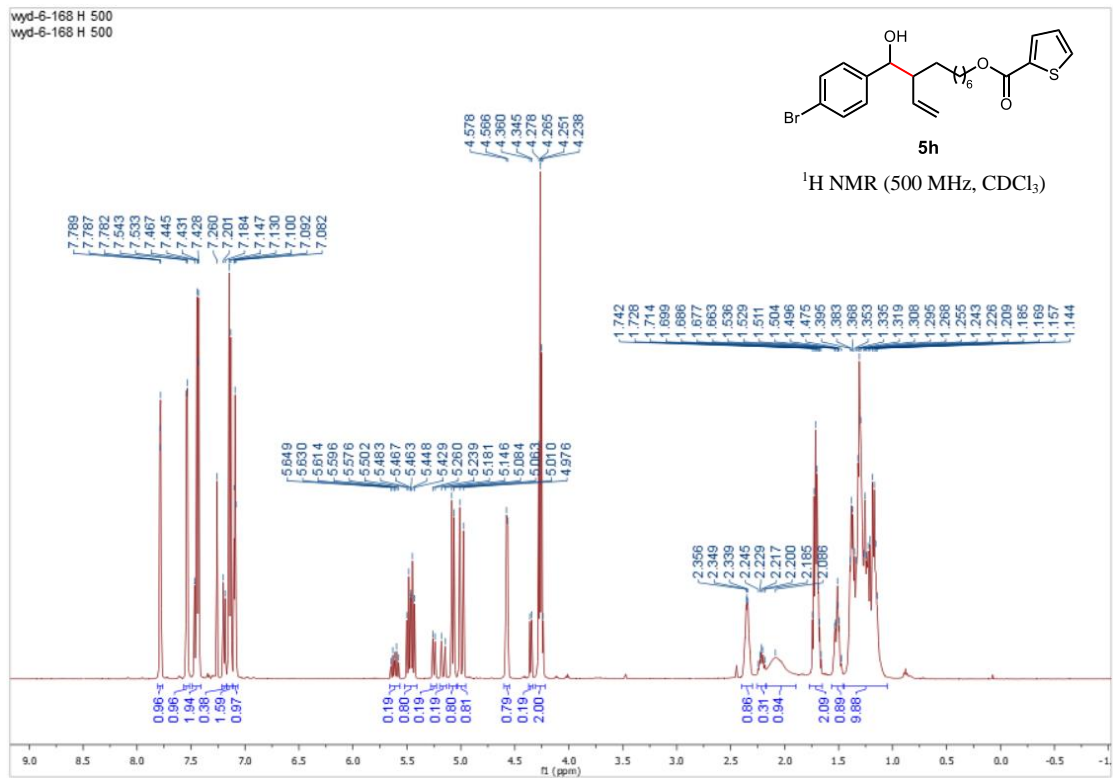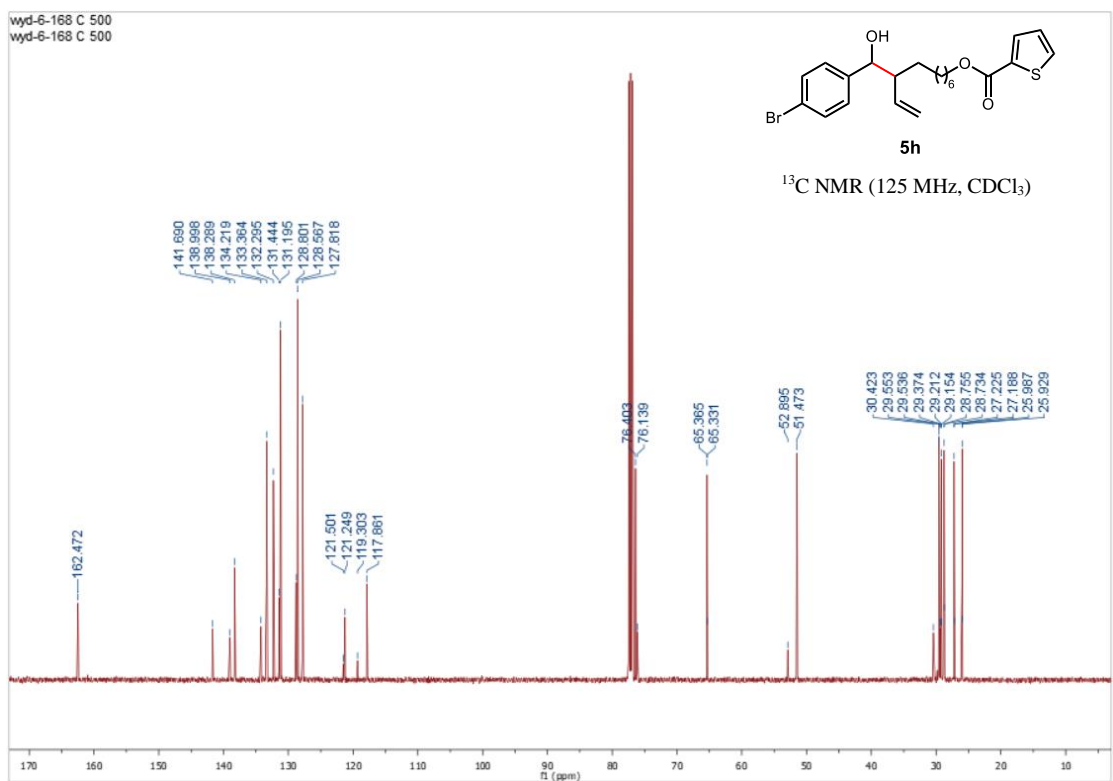

wyd-6-178 H 500  
wzd-6-178 H 500

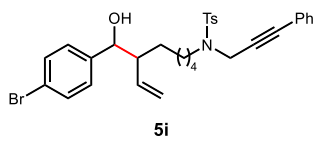

<sup>1</sup>H NMR (500 MHz, CDCl<sub>3</sub>)

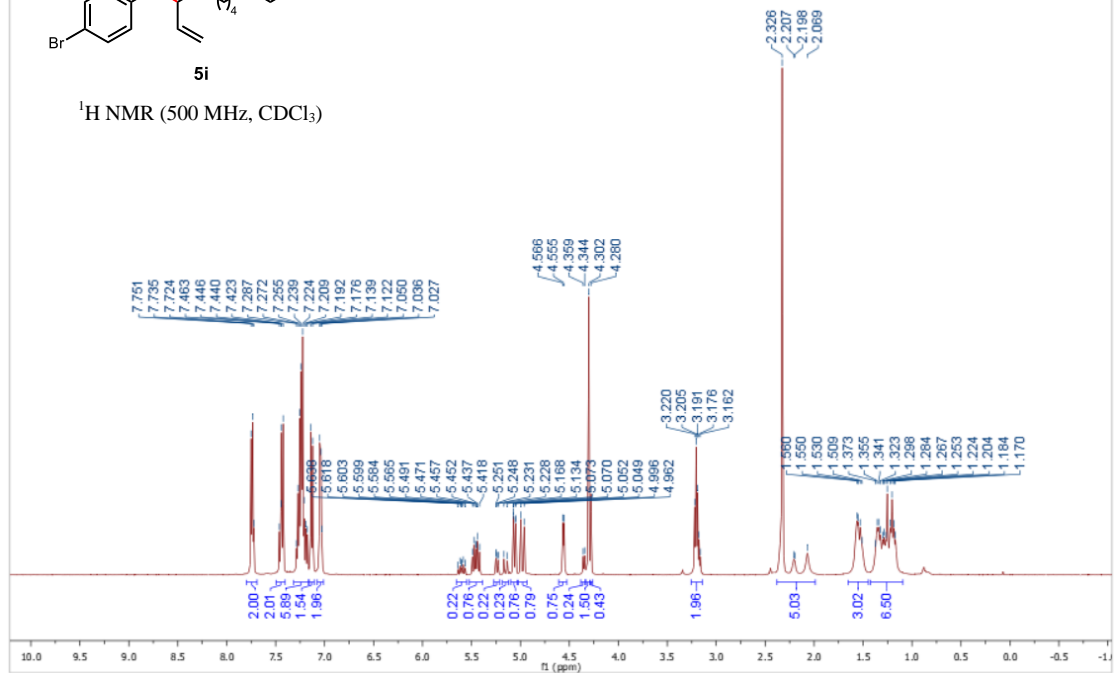

wyd-6-178 C 500  
wzd-6-178 C 500

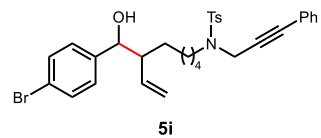

<sup>13</sup>C NMR (125 MHz, CDCl<sub>3</sub>)

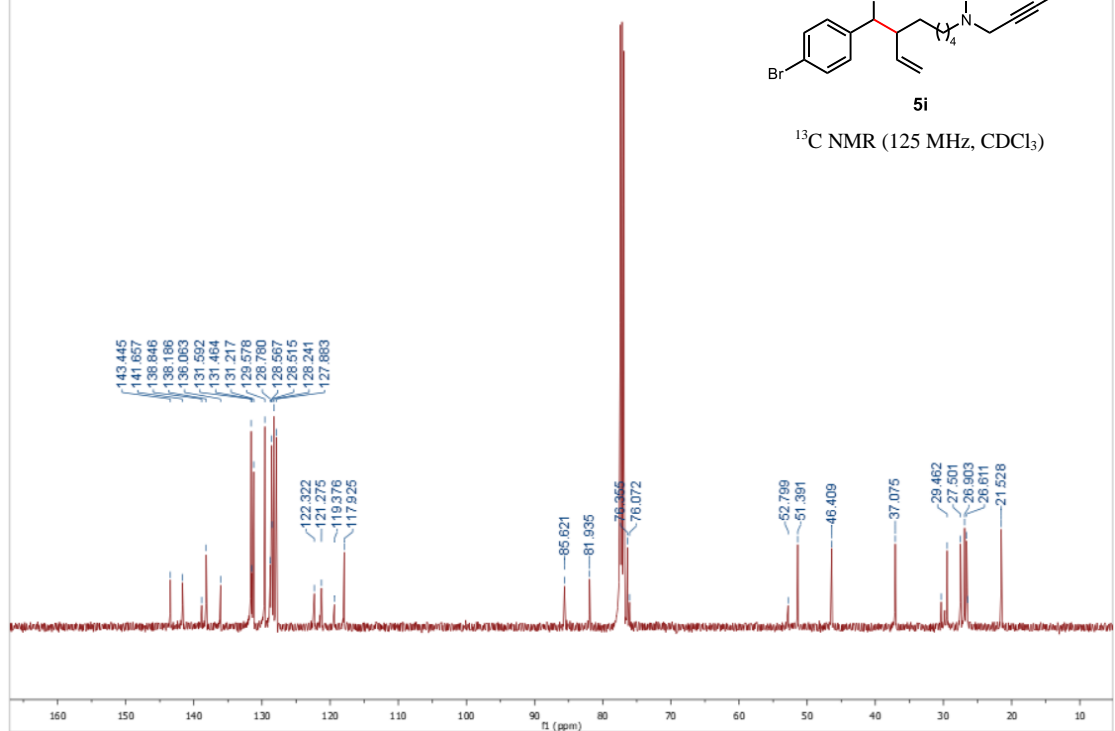

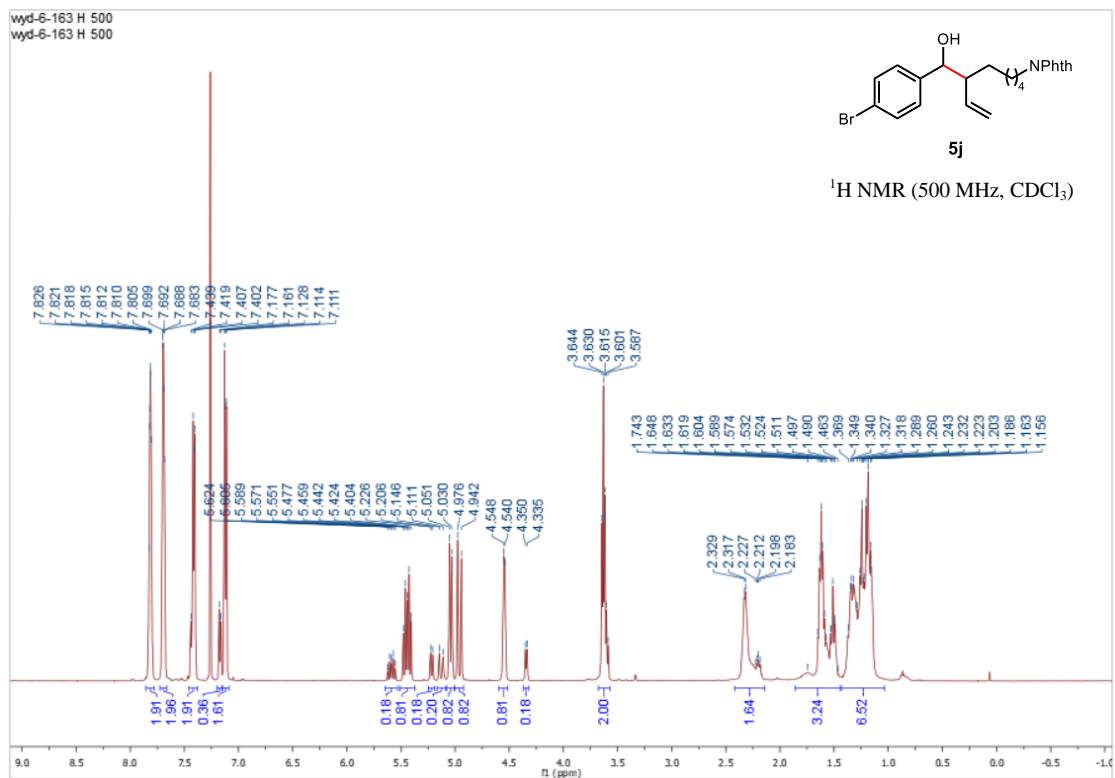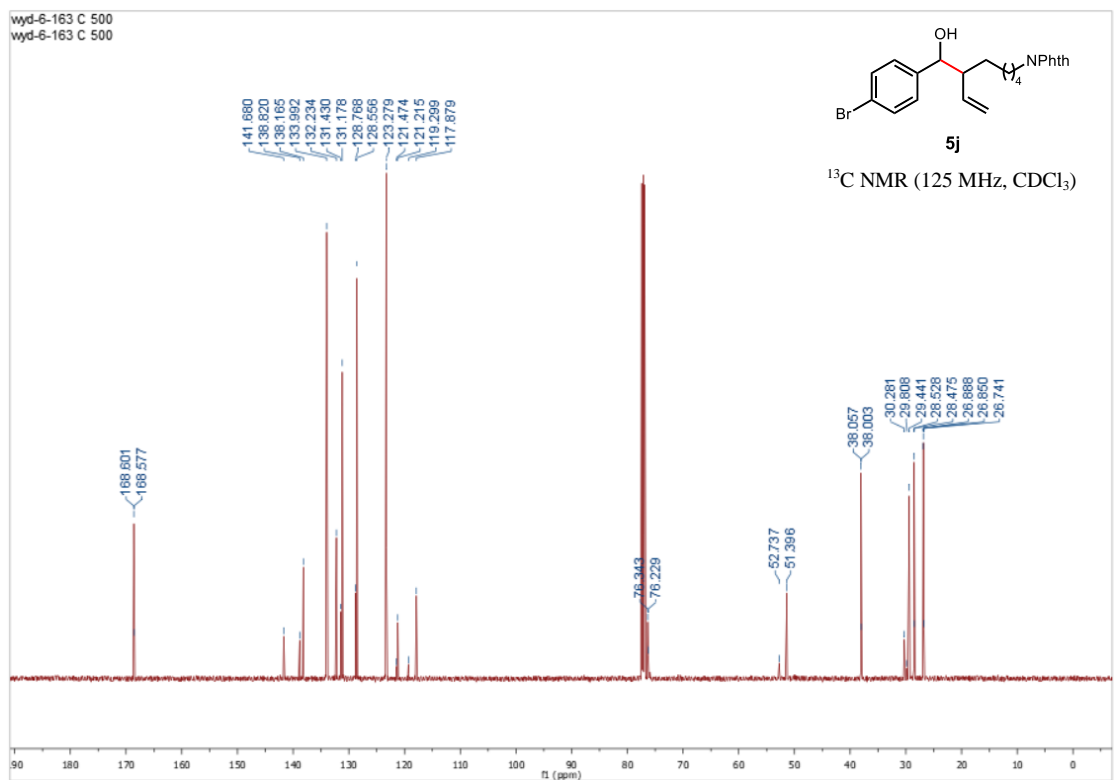

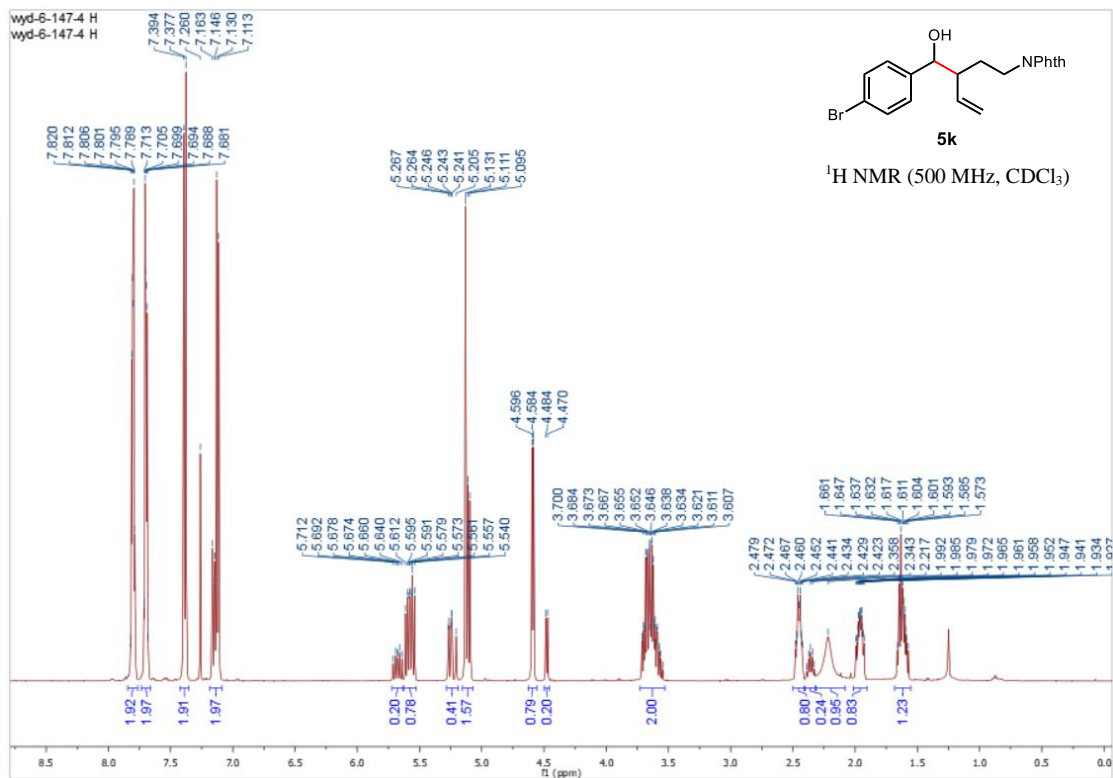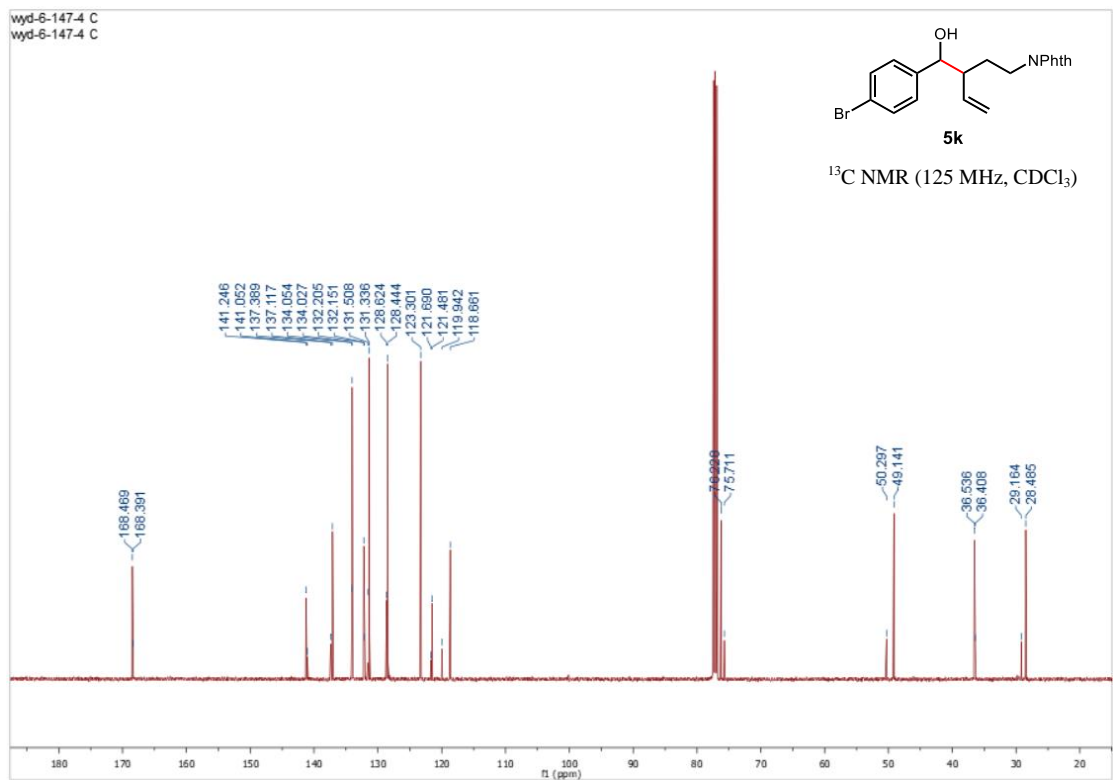

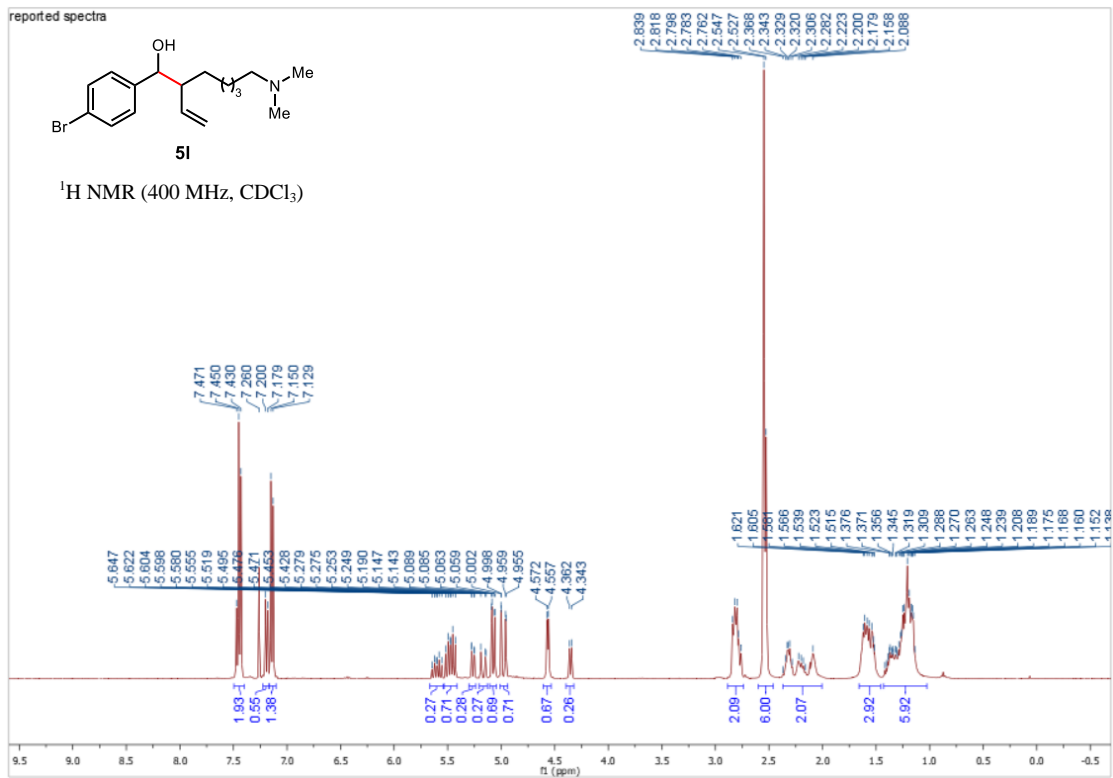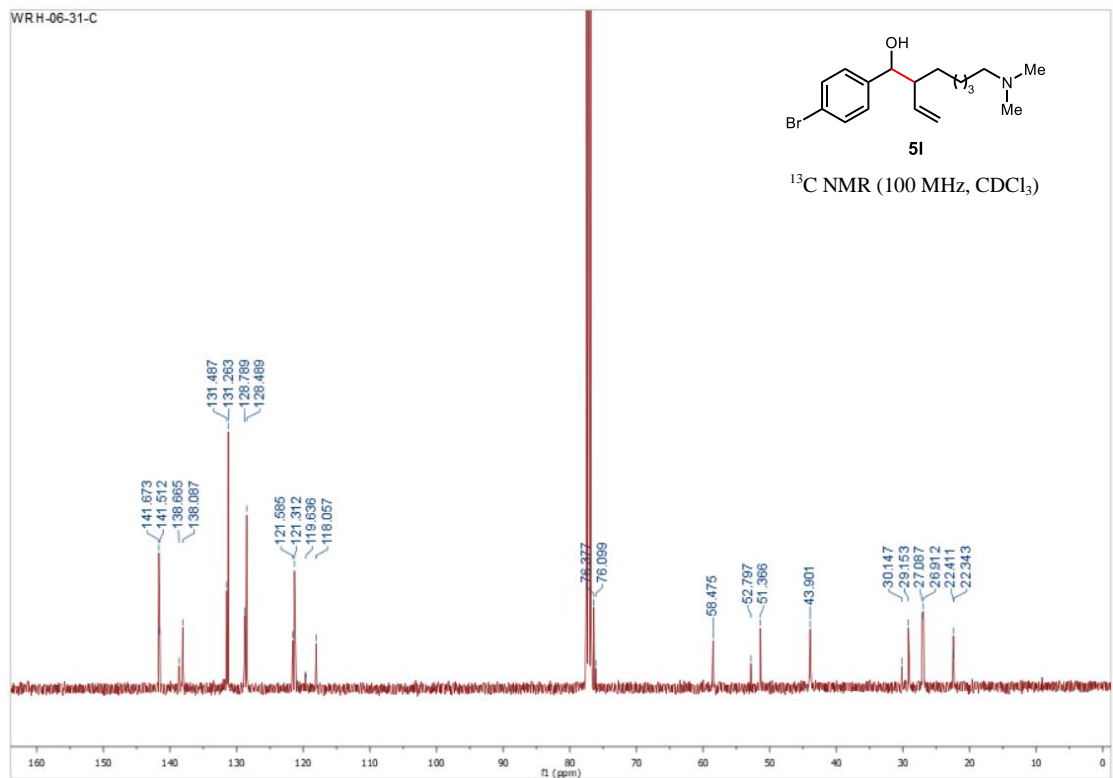



WRH-06-46B\*  
WRH-06-46B\*

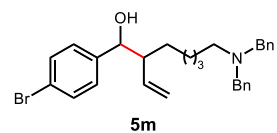

<sup>1</sup>H NMR (400 MHz, CDCl<sub>3</sub>)

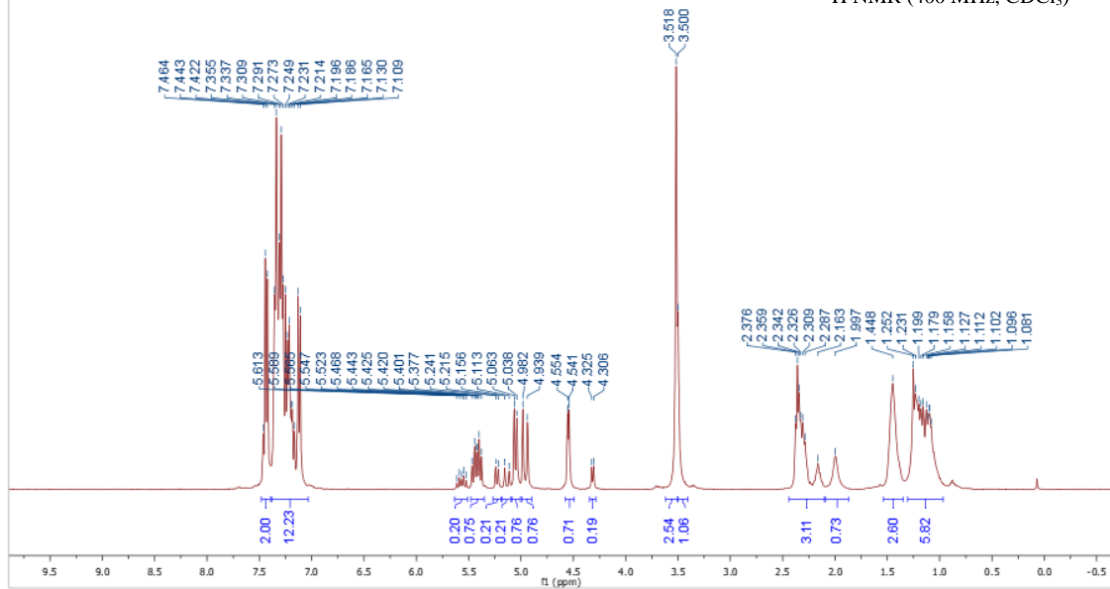

WRH-06-44A-C

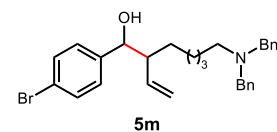

<sup>13</sup>C NMR (100 MHz, CDCl<sub>3</sub>)

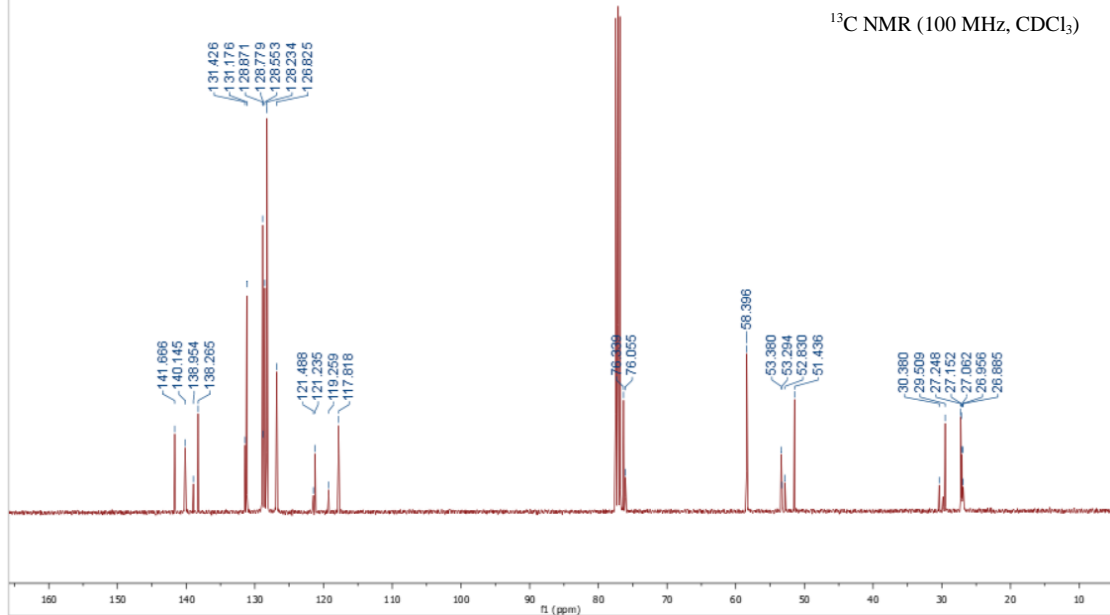

WRH-06-47A-2

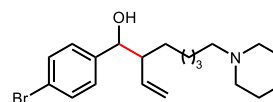

**5n**

<sup>1</sup>H NMR (400 MHz, CDCl<sub>3</sub>)

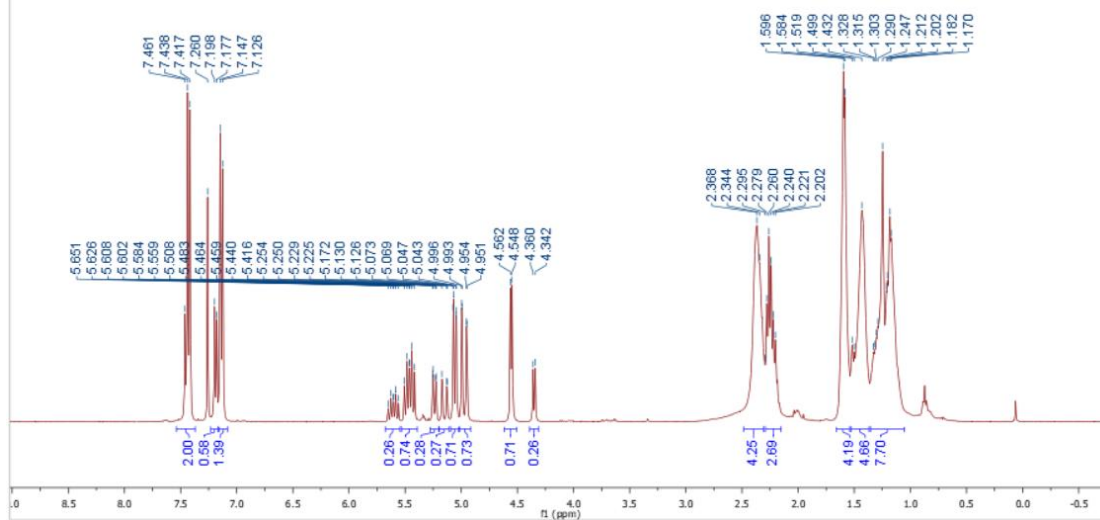

WRH-06-47-C

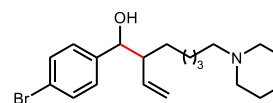

**5n**

<sup>13</sup>C NMR (100 MHz, CDCl<sub>3</sub>)

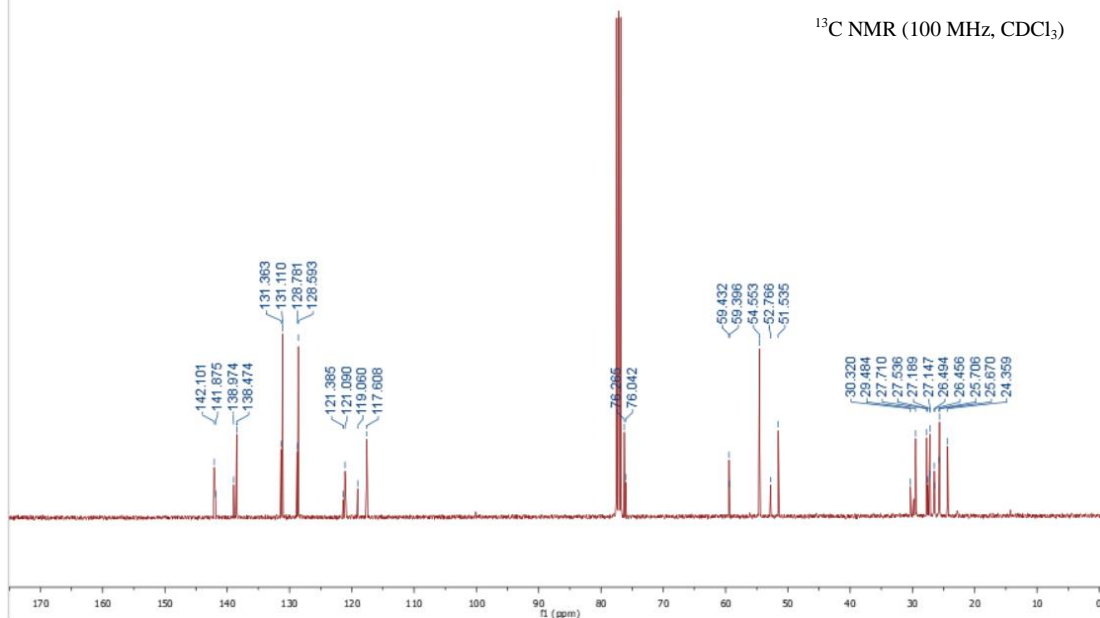

WRH-06-50B-H

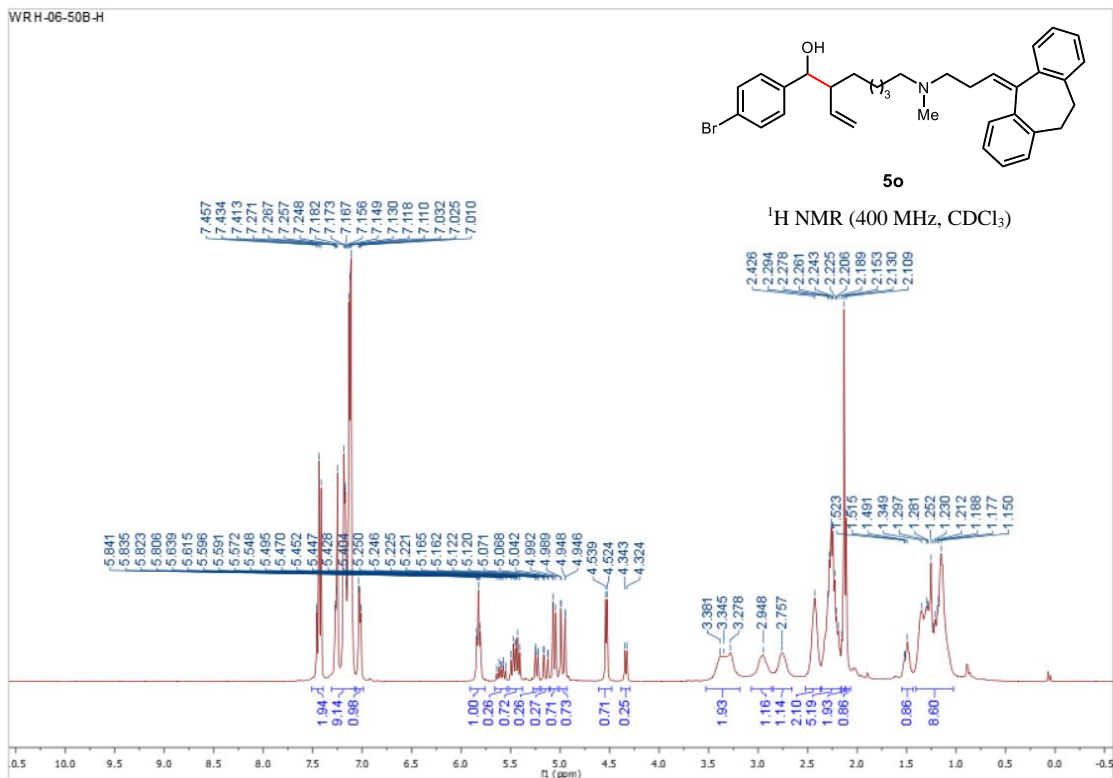

WRH-06-50B-C

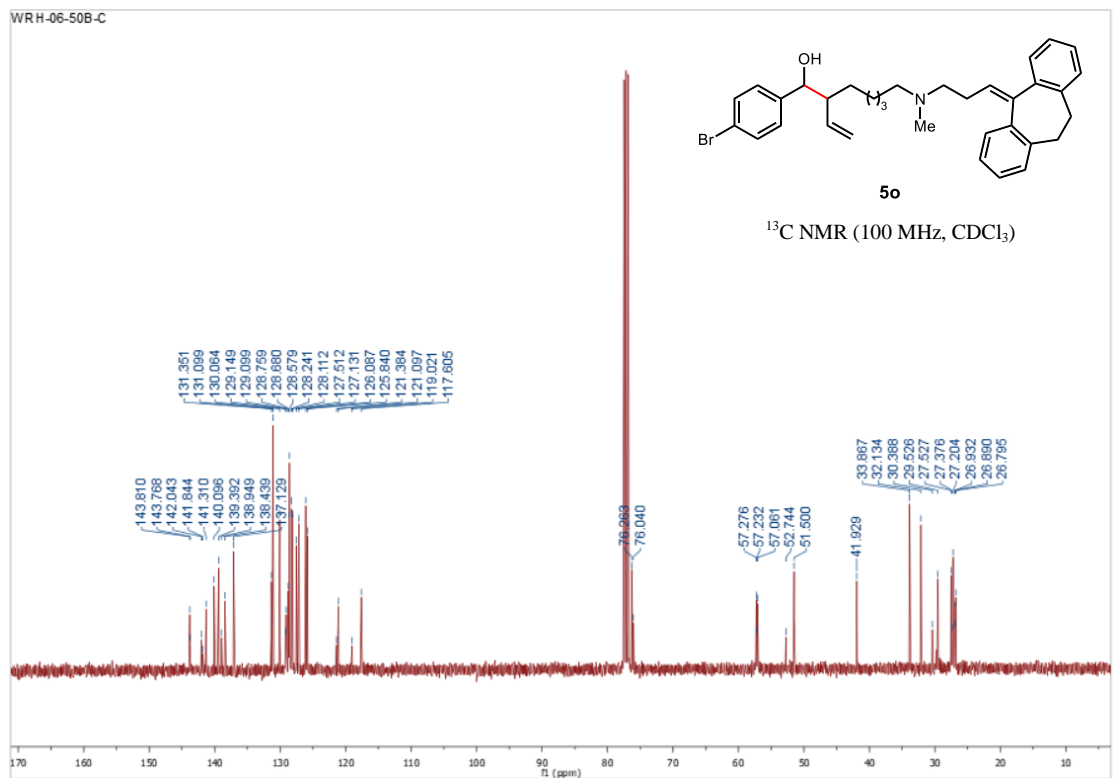

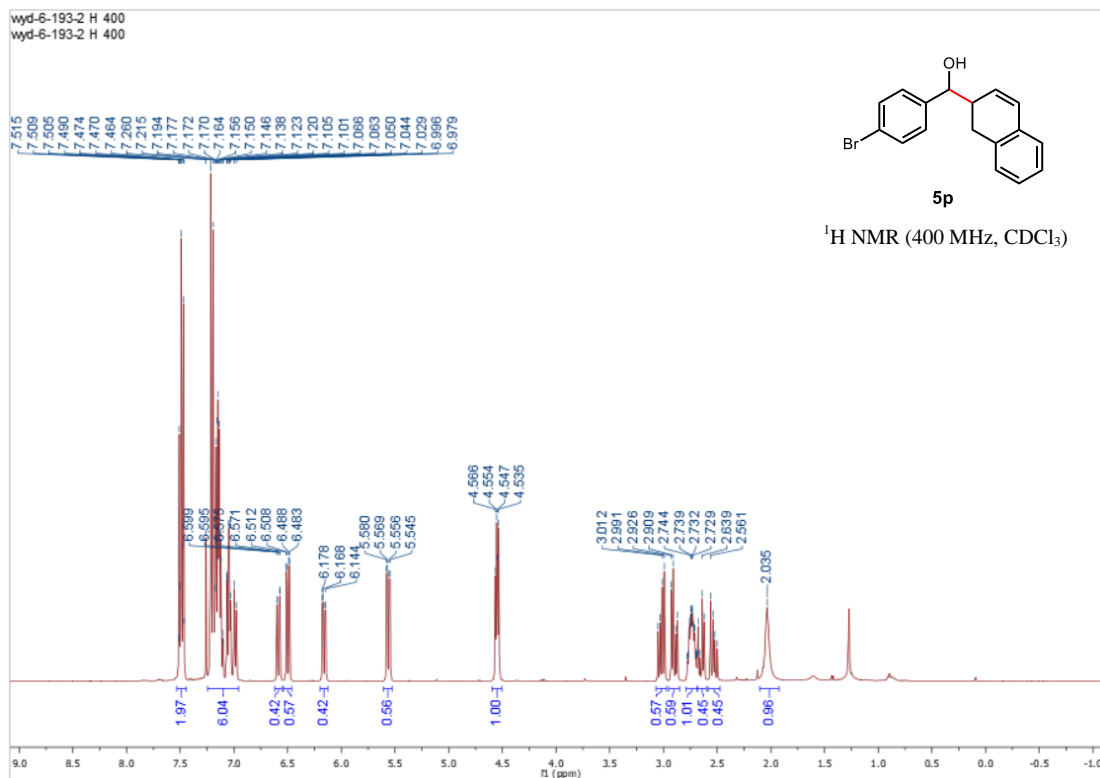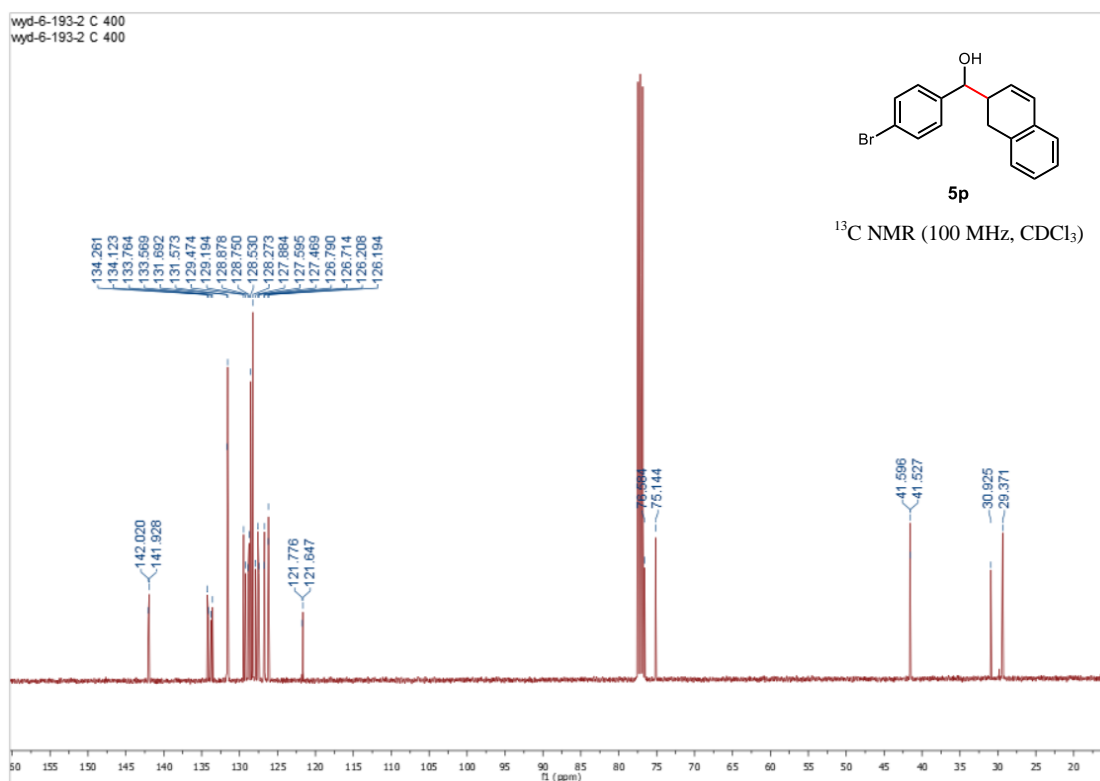

wyd-6-193-1 H 400  
wzd-6-193-1 H 400

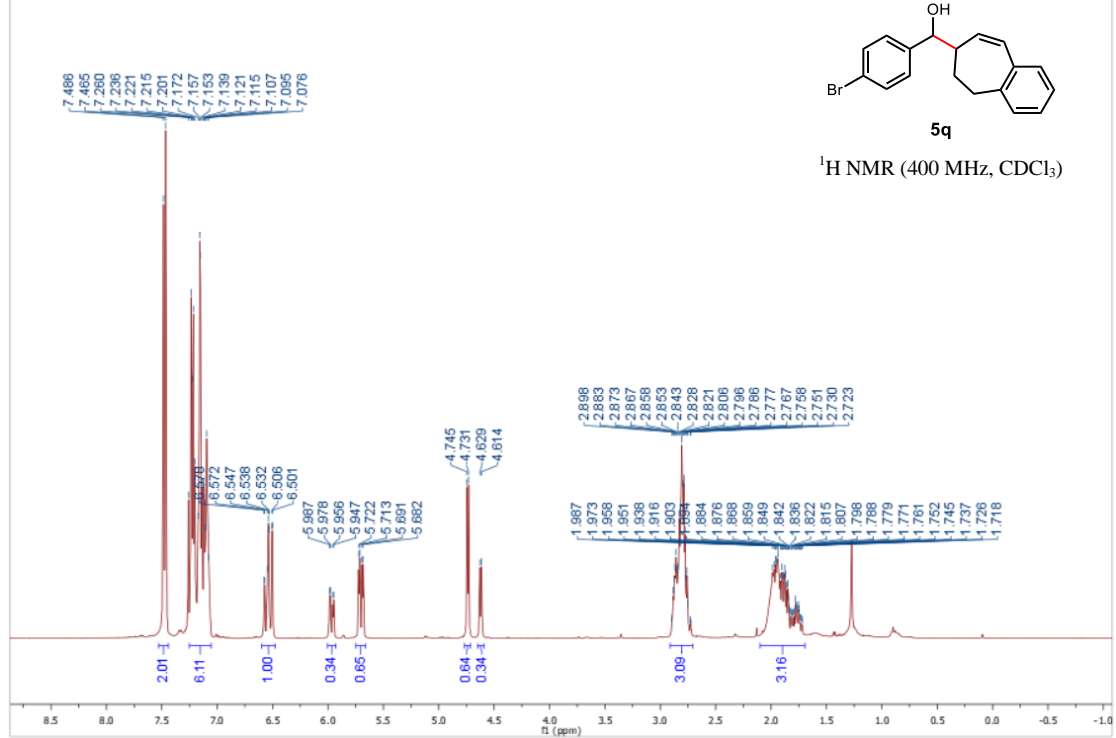

wyd-6-193-1 C 400  
wzd-6-193-1 C 400

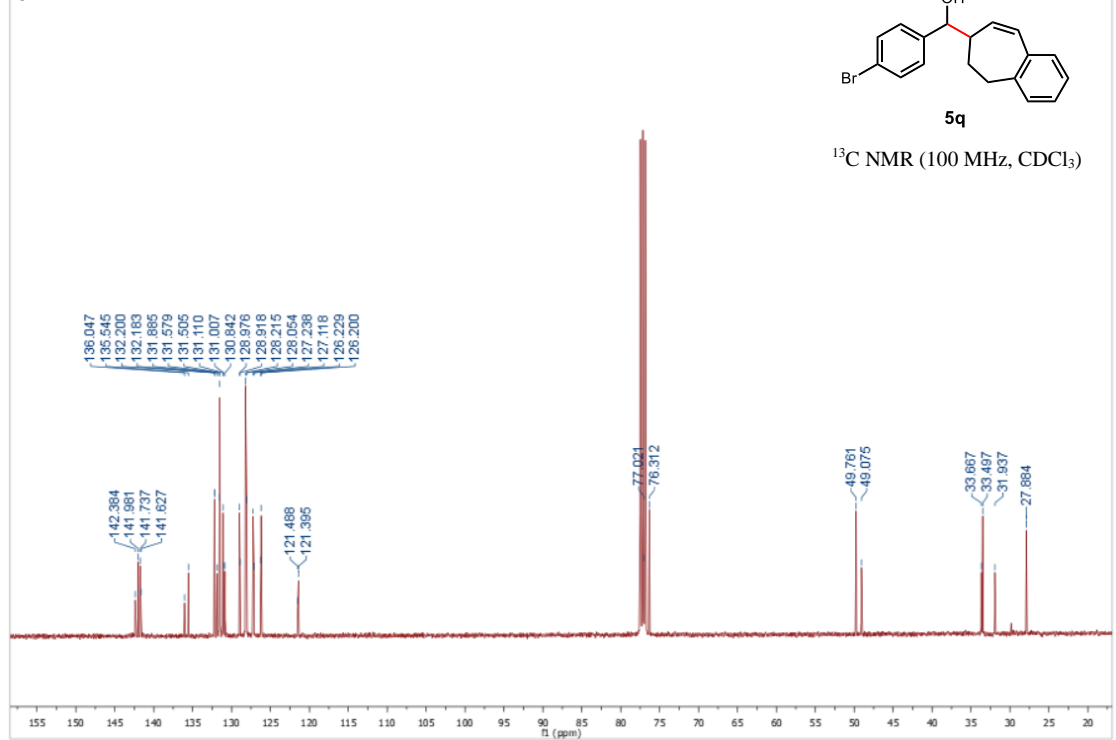

wyd-6-197-2 H 400  
wyd-6-197-2 H 400

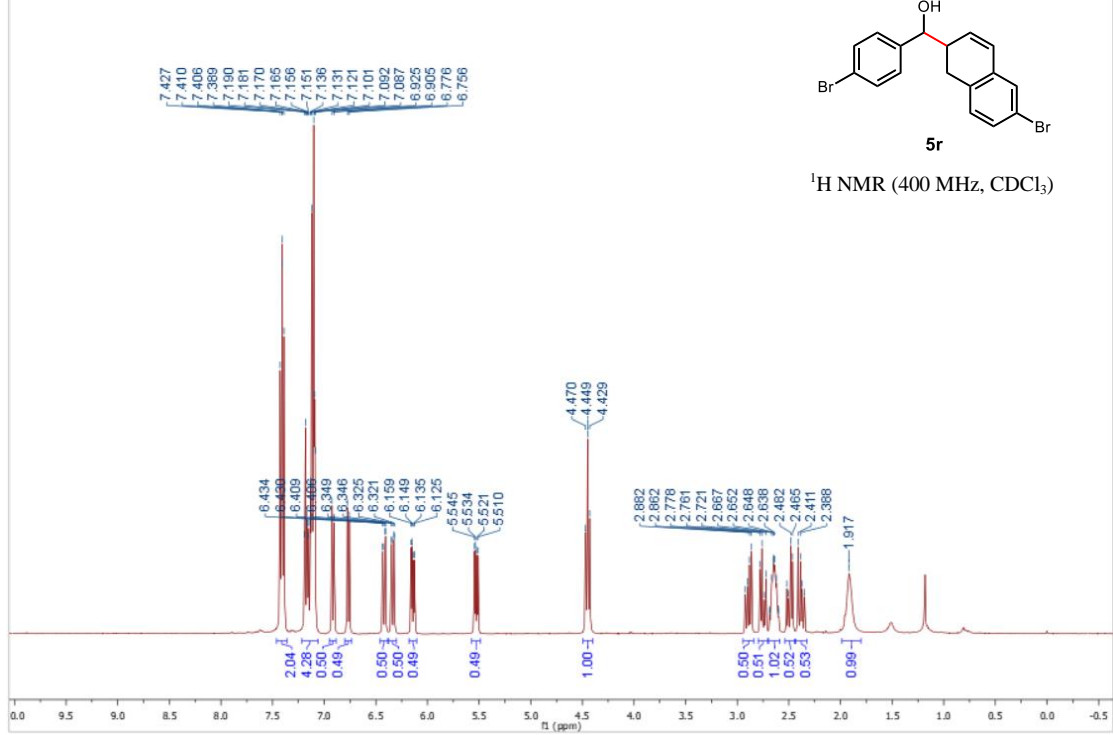

wyd-6-197-2 C 400  
wyd-6-197-2 C 400

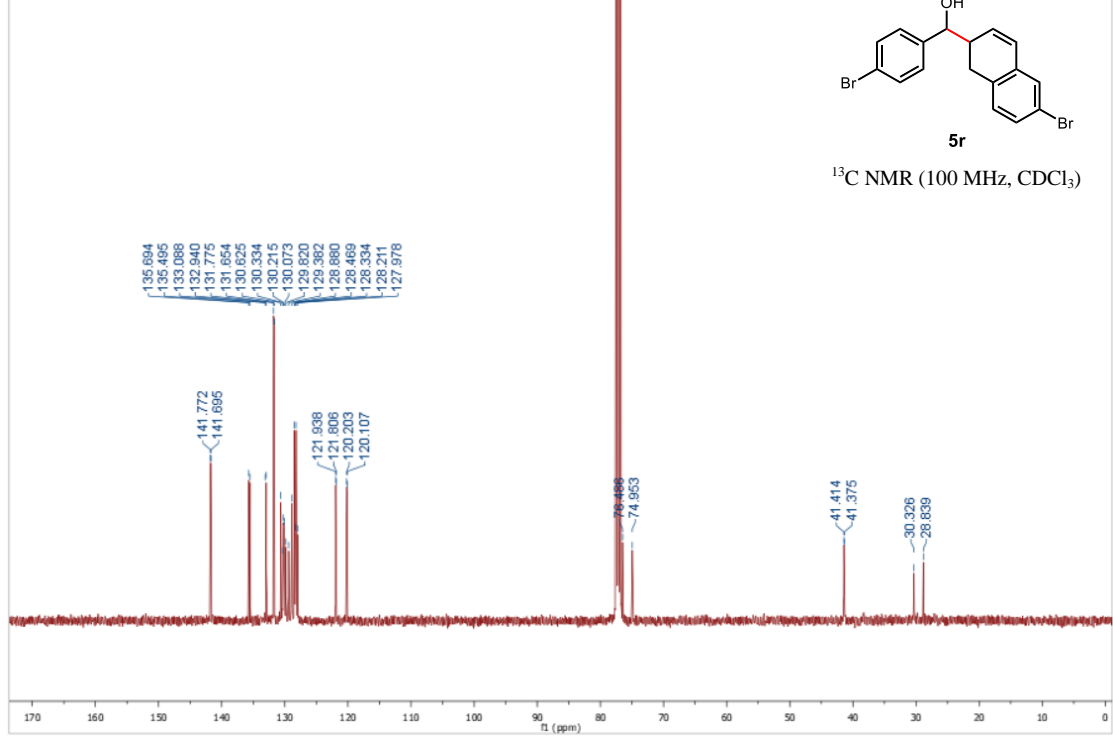

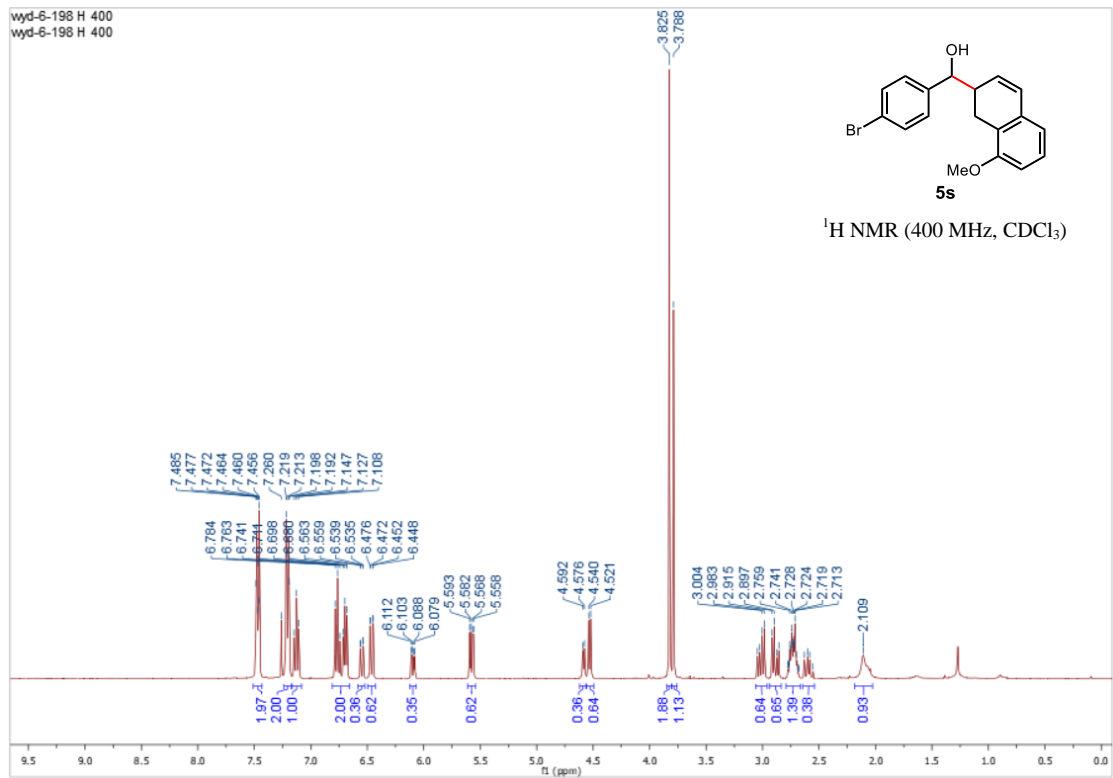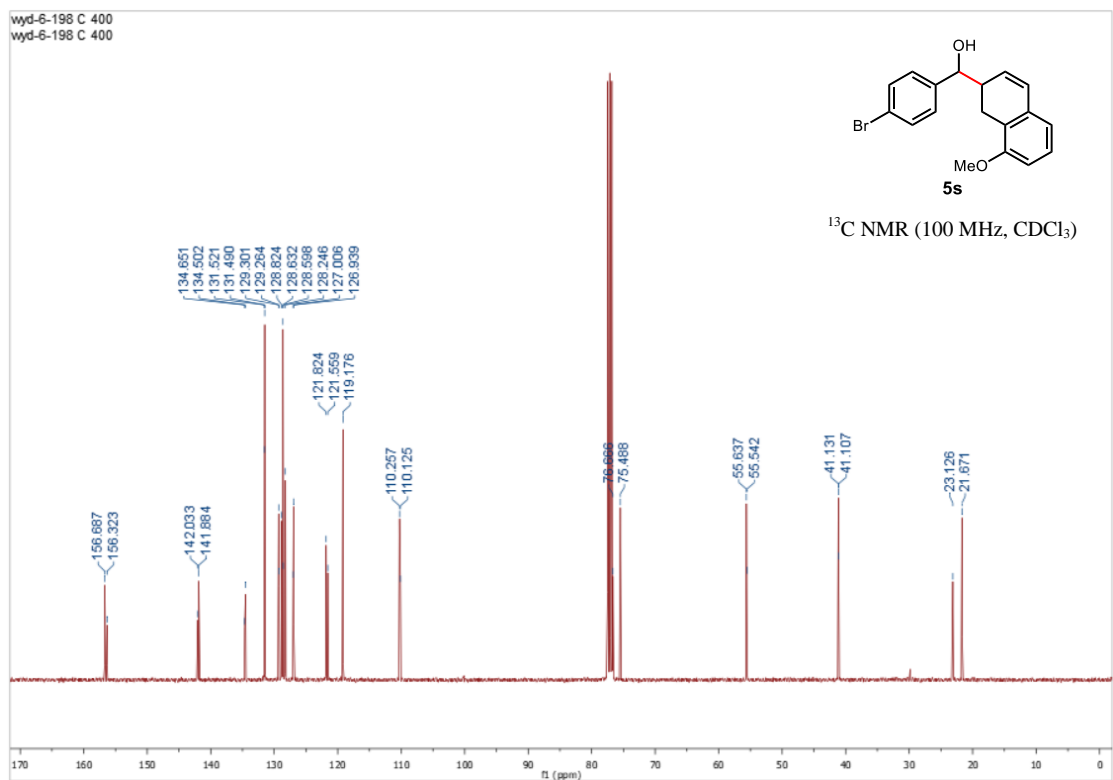

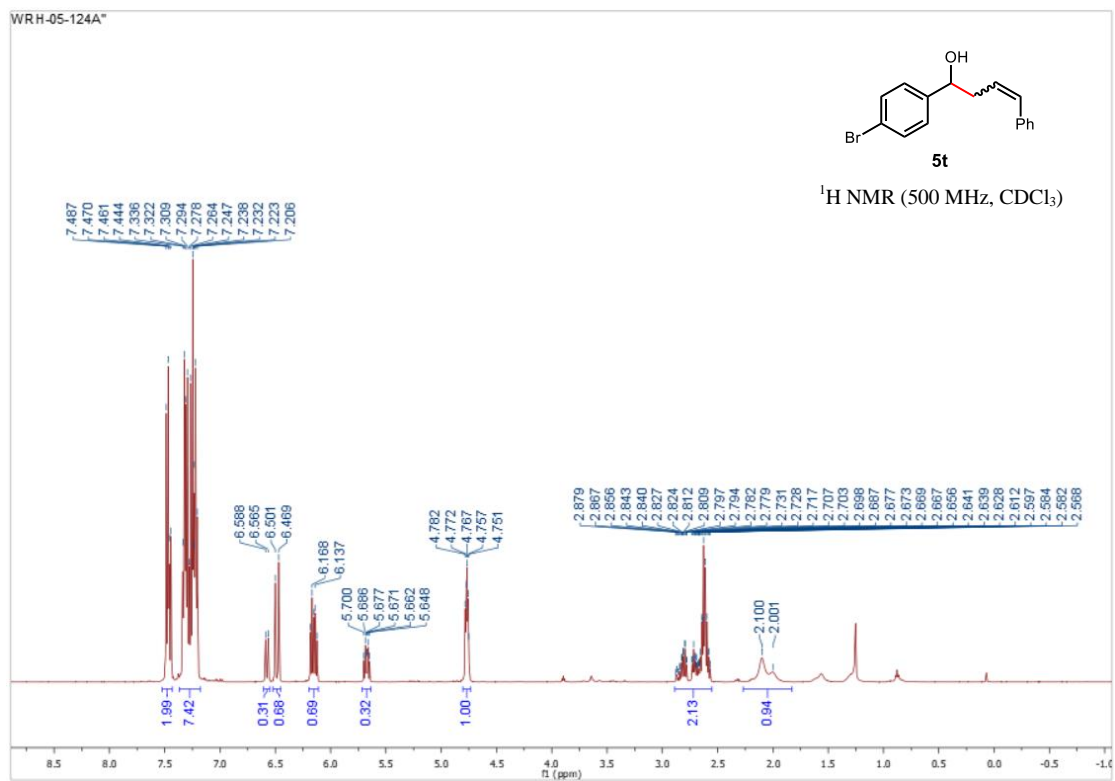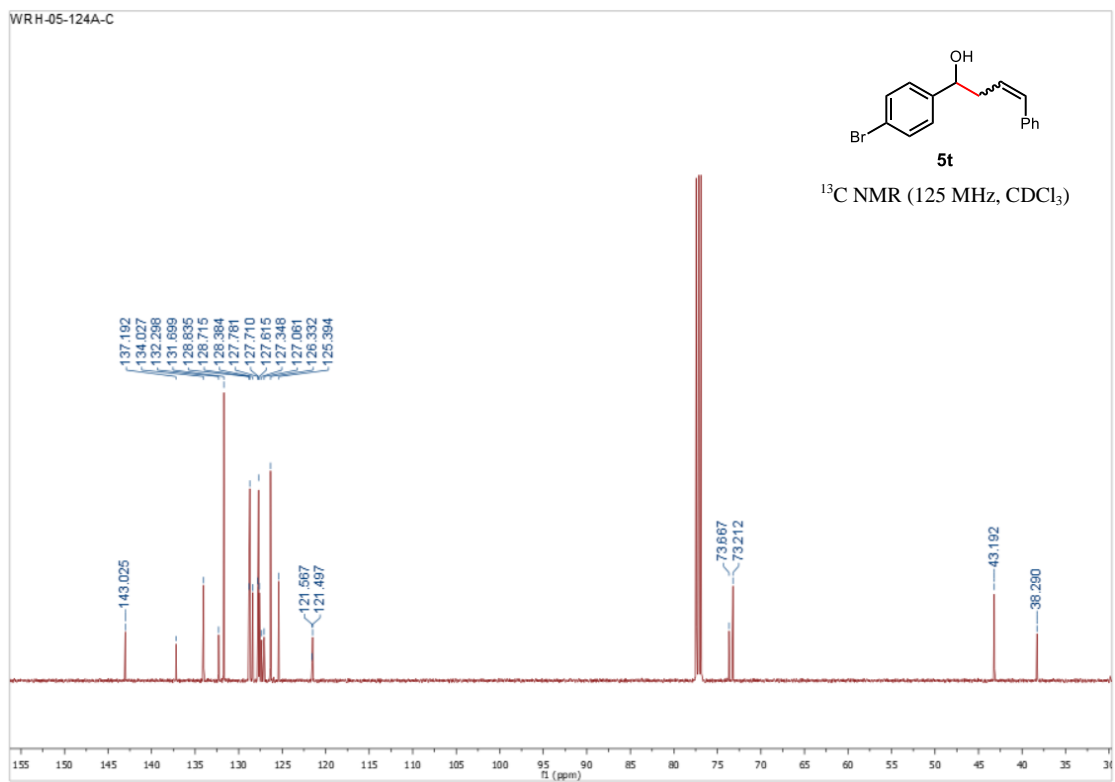



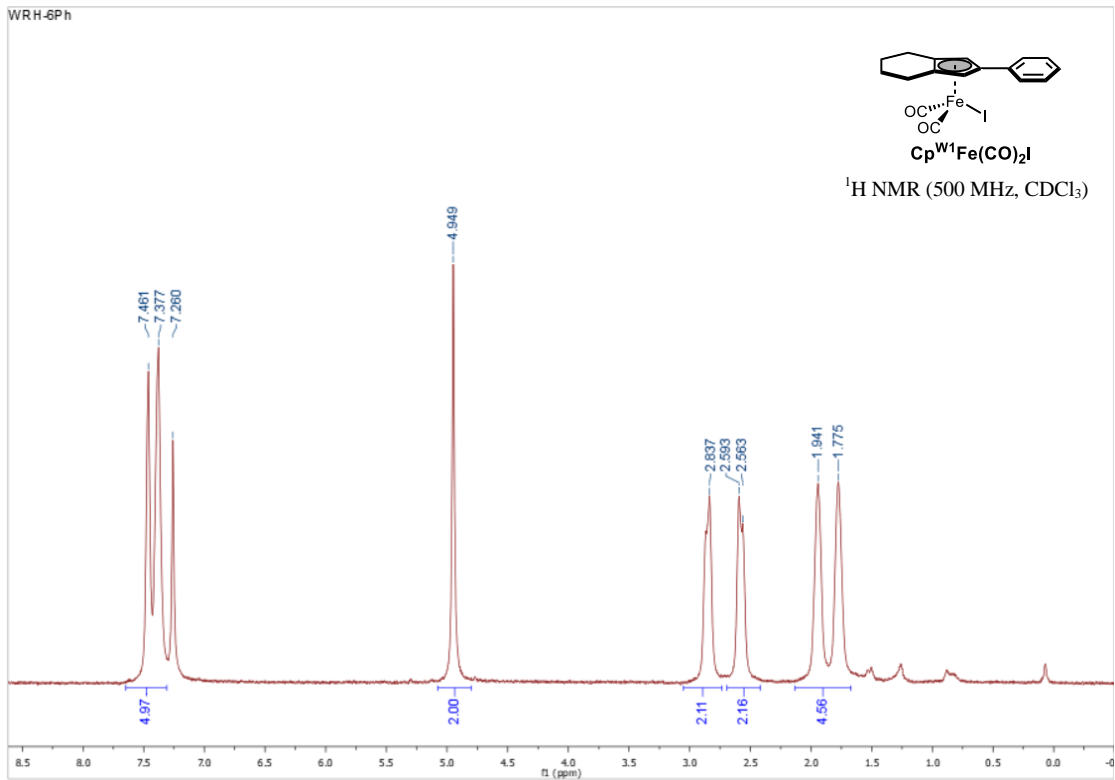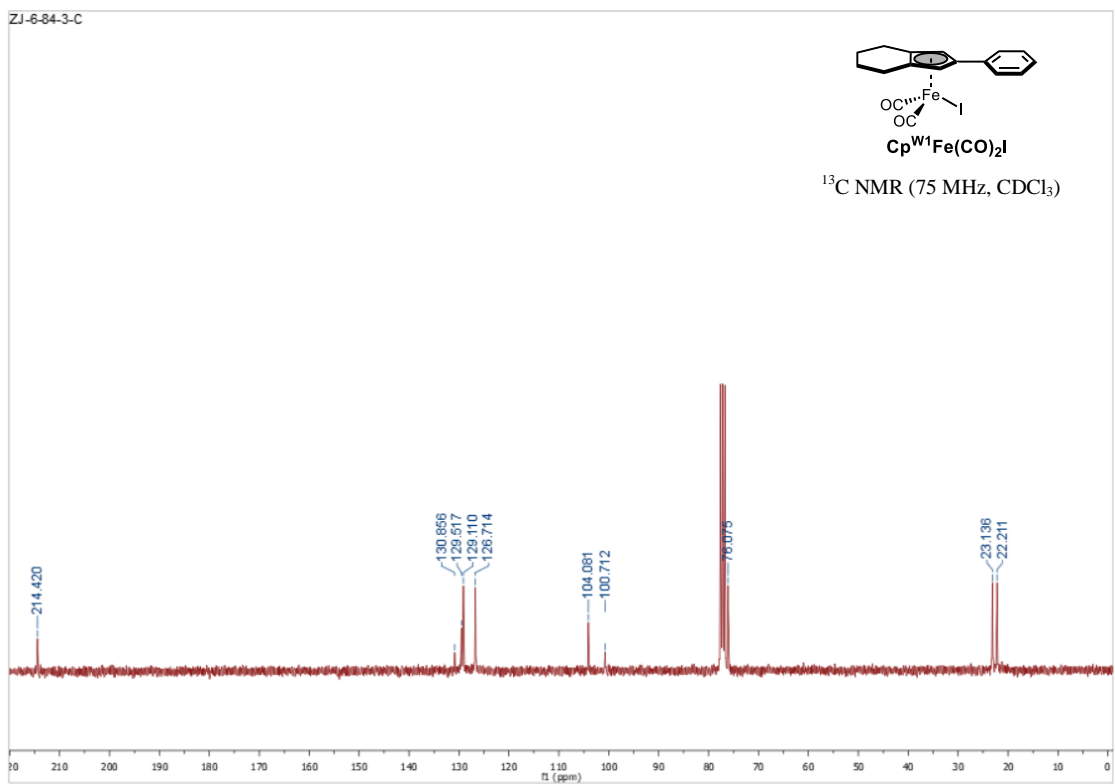

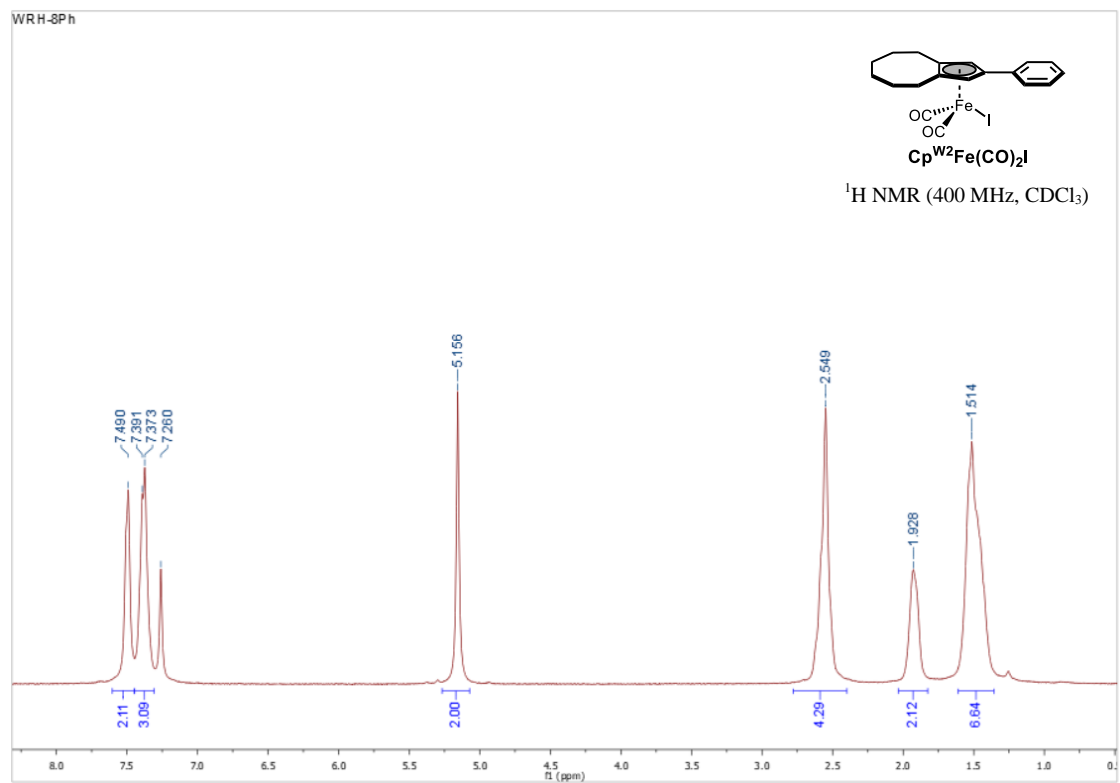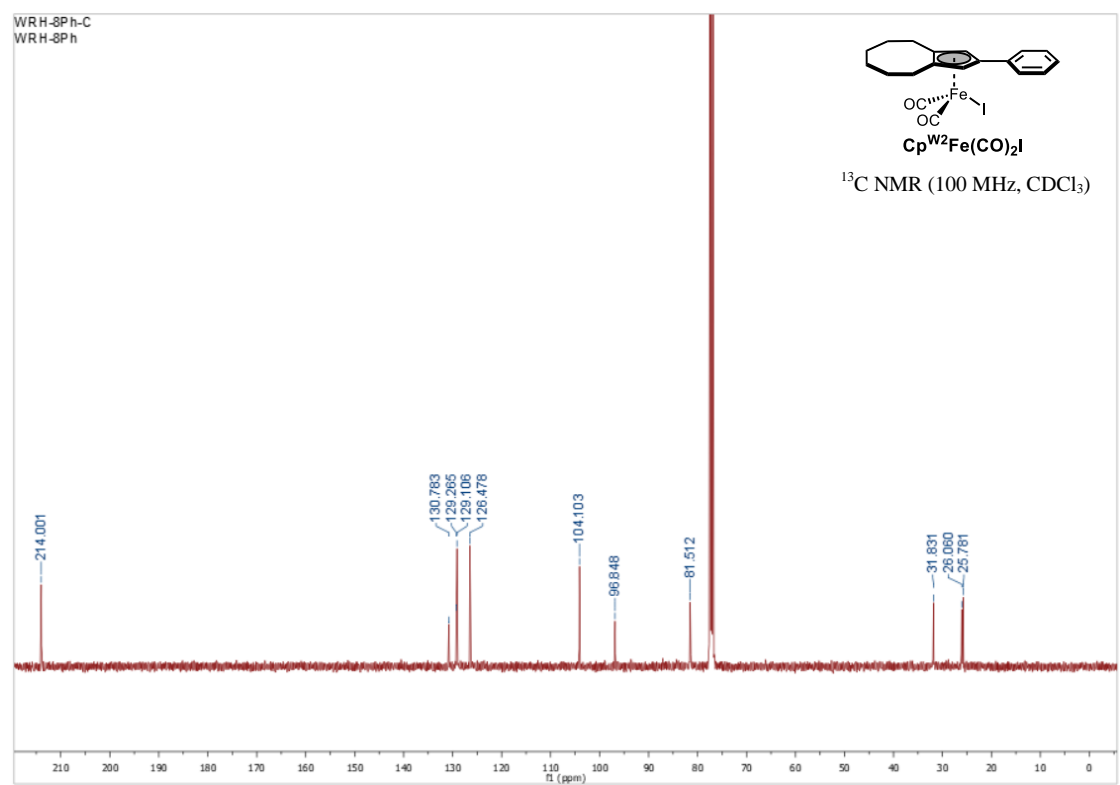

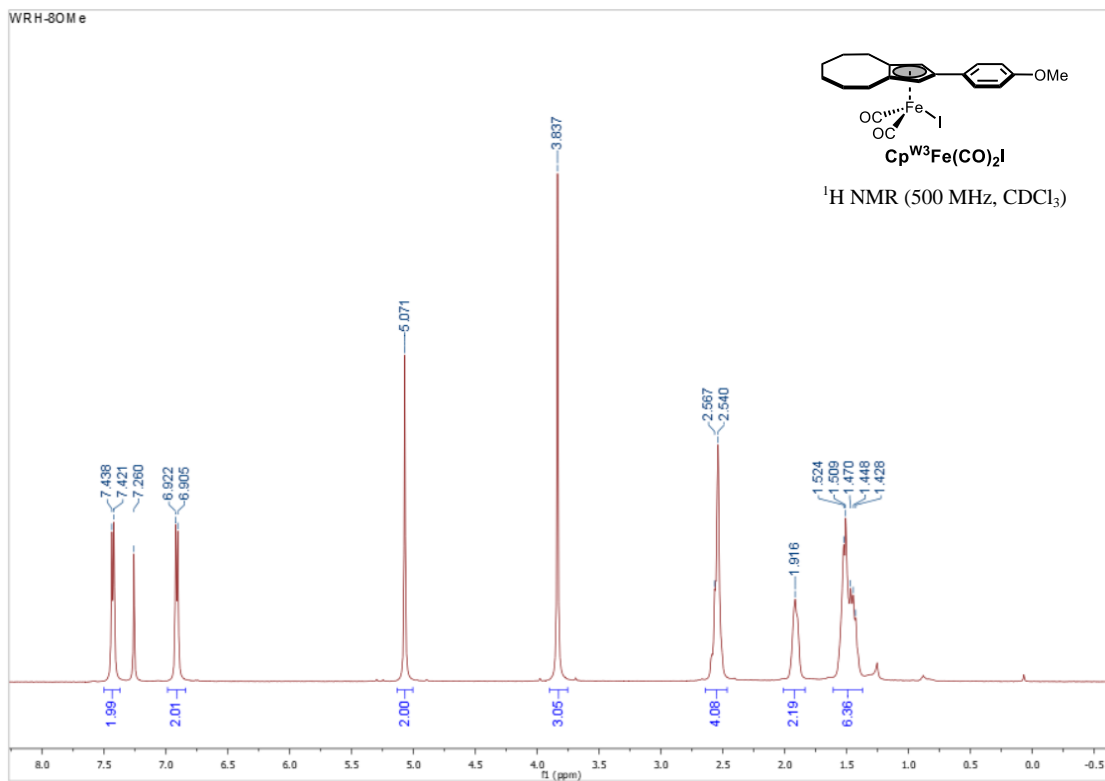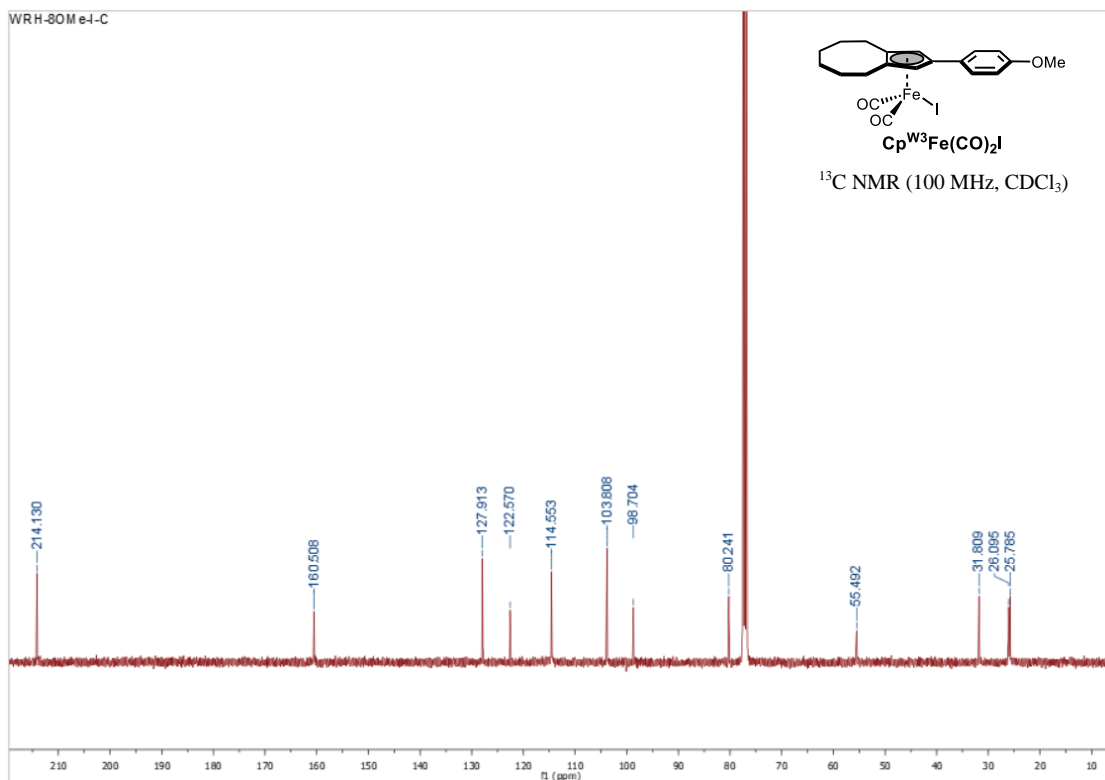

WRH-05-3A

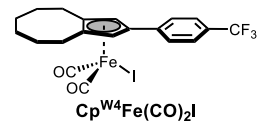

$^1\text{H NMR}$  (300 MHz,  $\text{CDCl}_3$ )

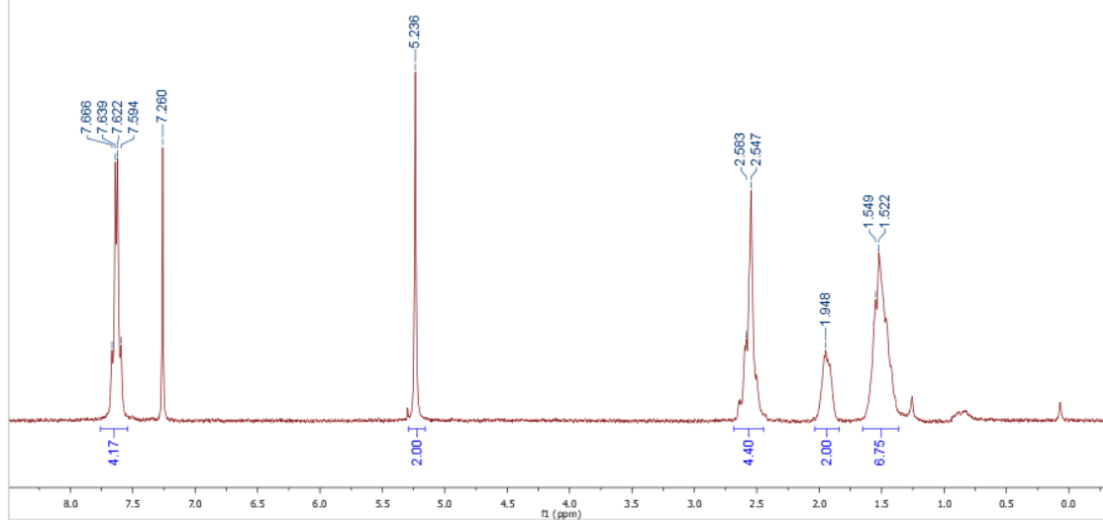

WRH-05-7-C

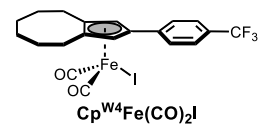

$^{13}\text{C NMR}$  (100 MHz,  $\text{CDCl}_3$ )

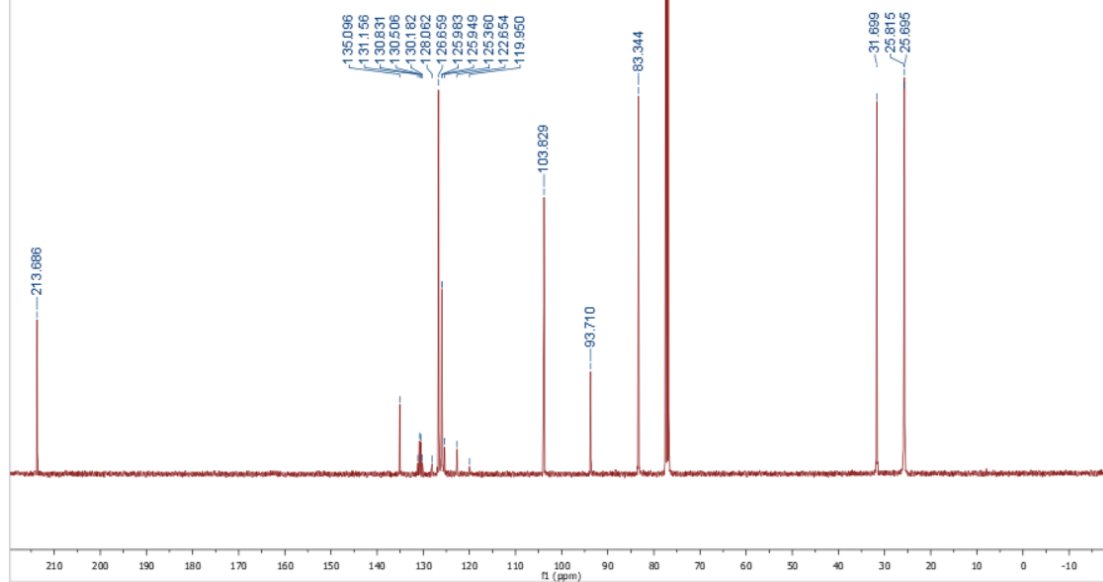

WRH-05-3A-F

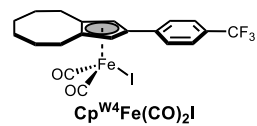

<sup>19</sup>F NMR (282 MHz, CDCl<sub>3</sub>)

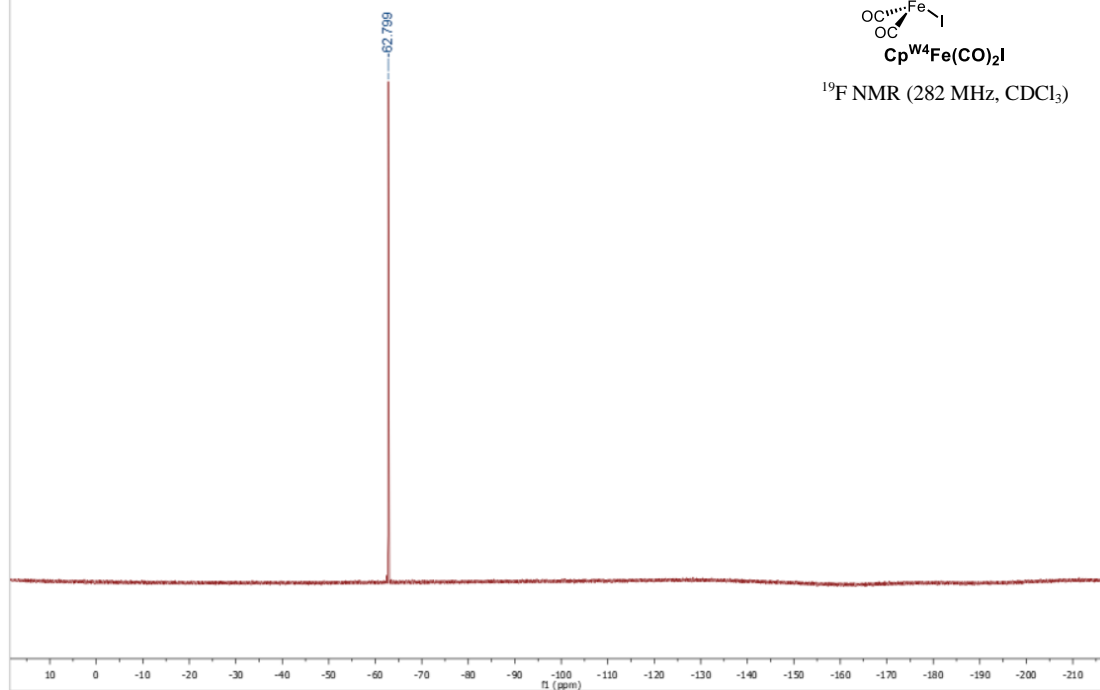

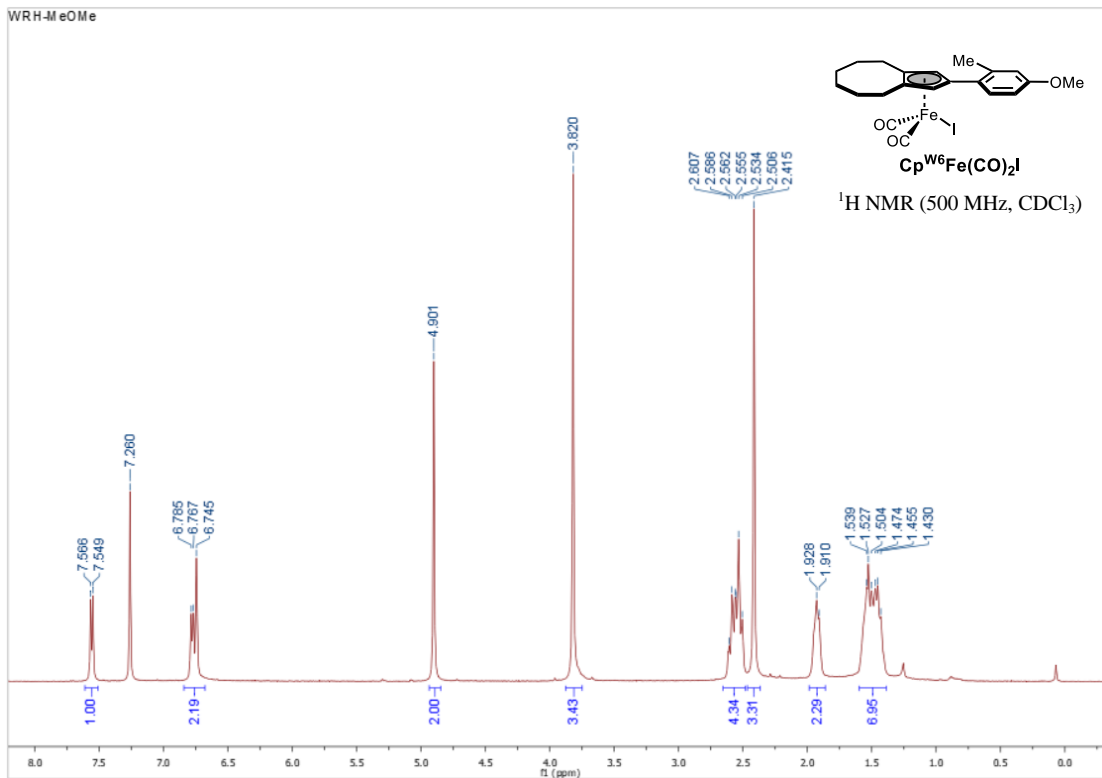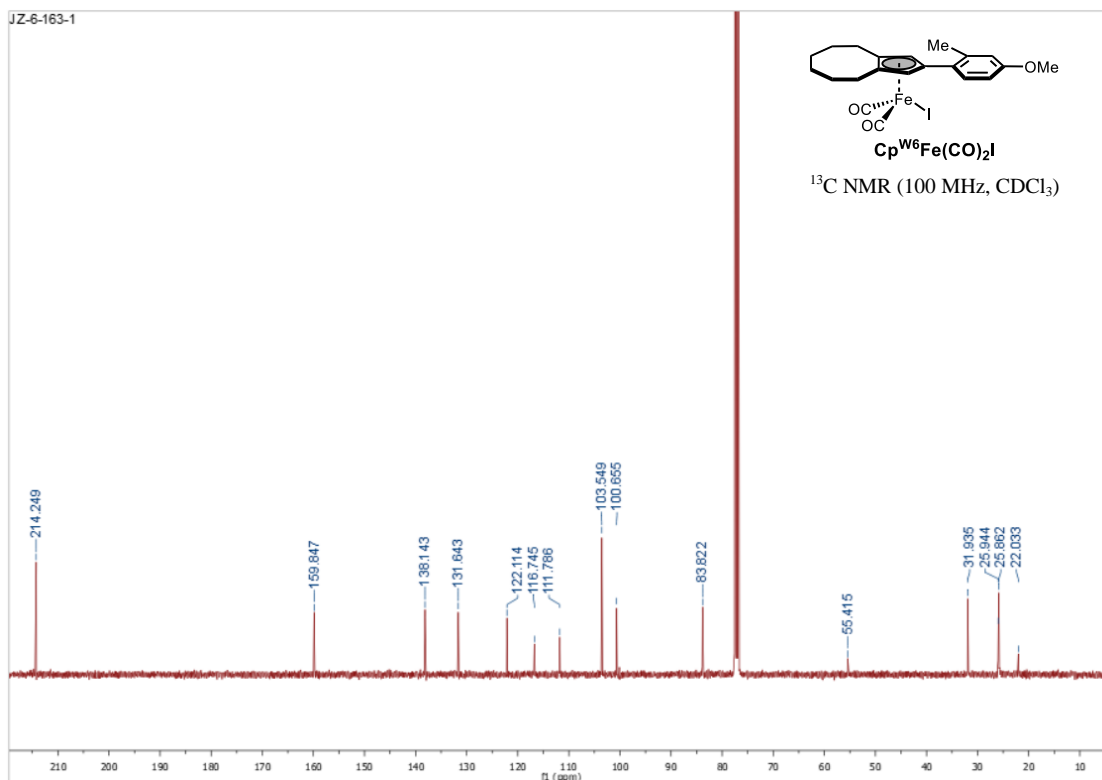

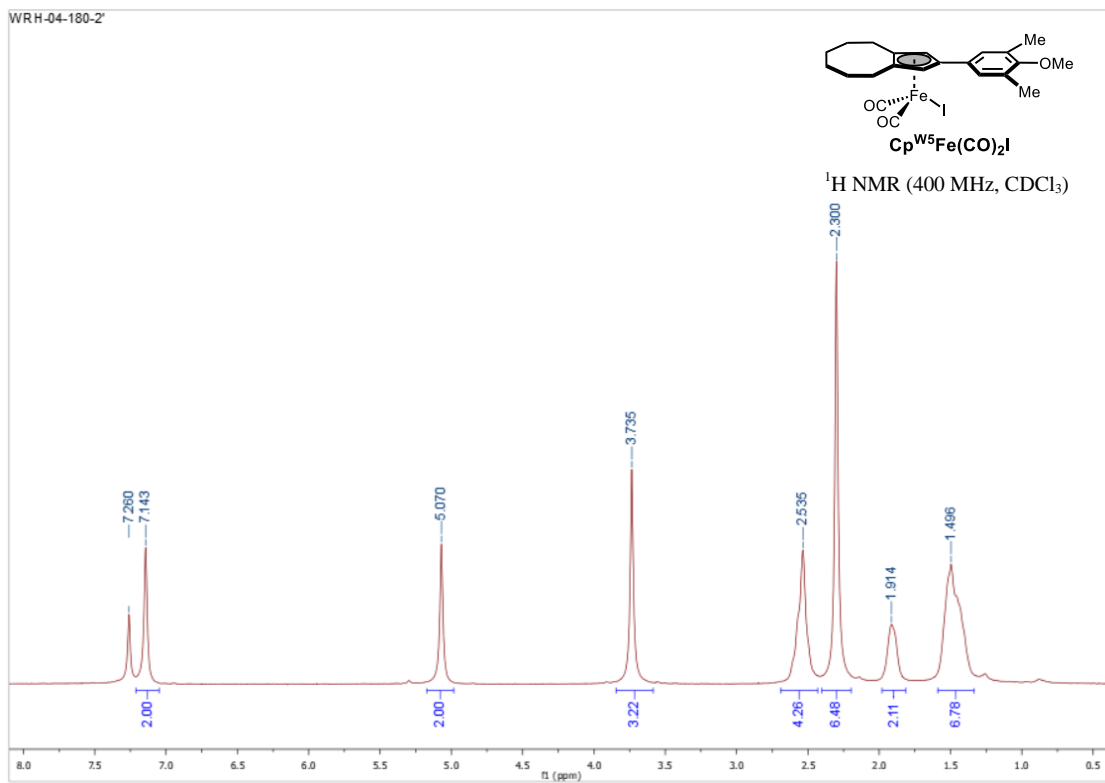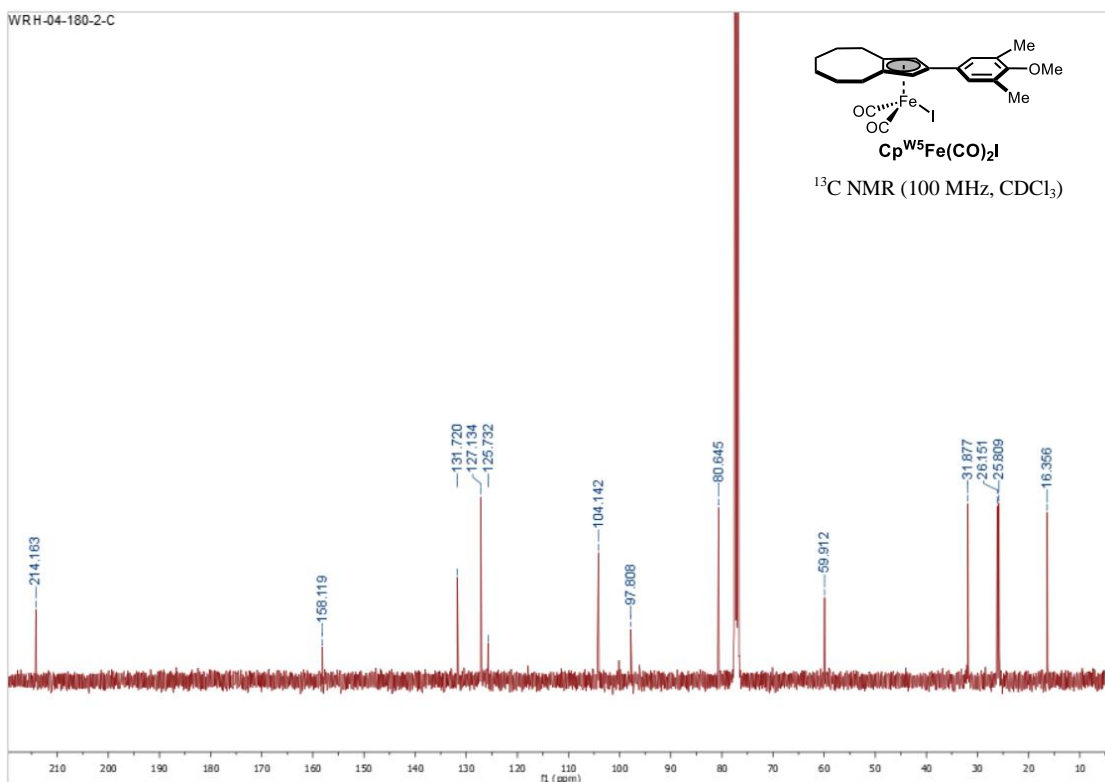

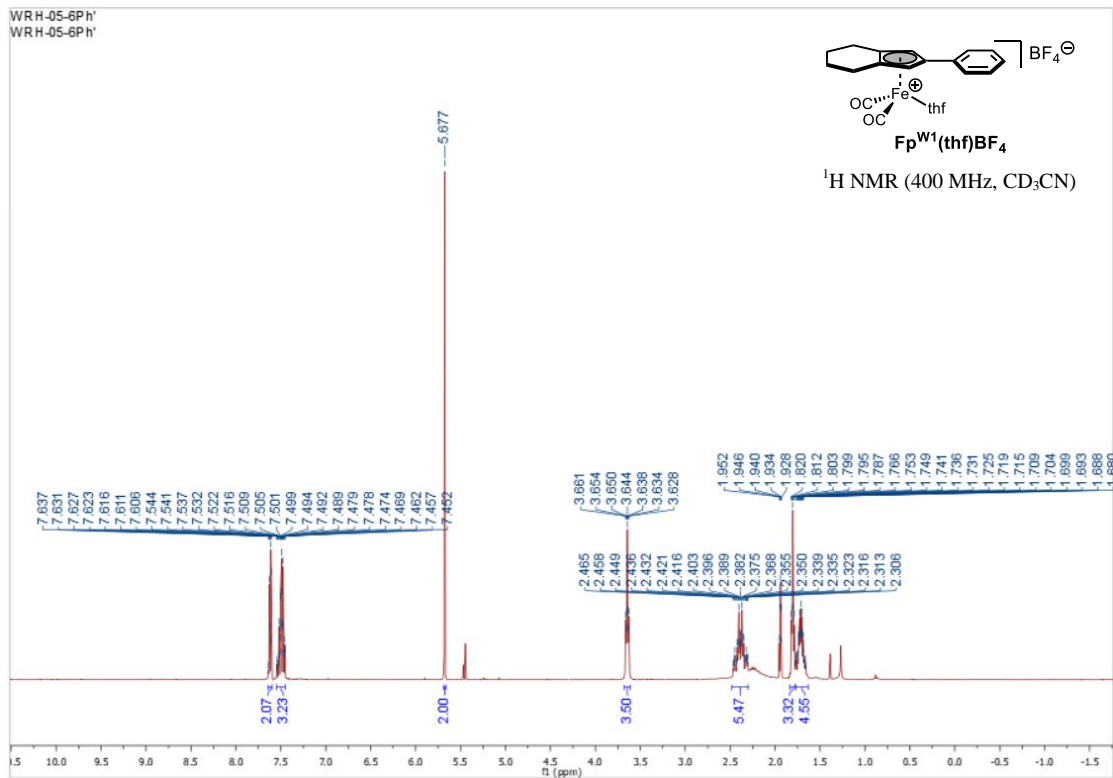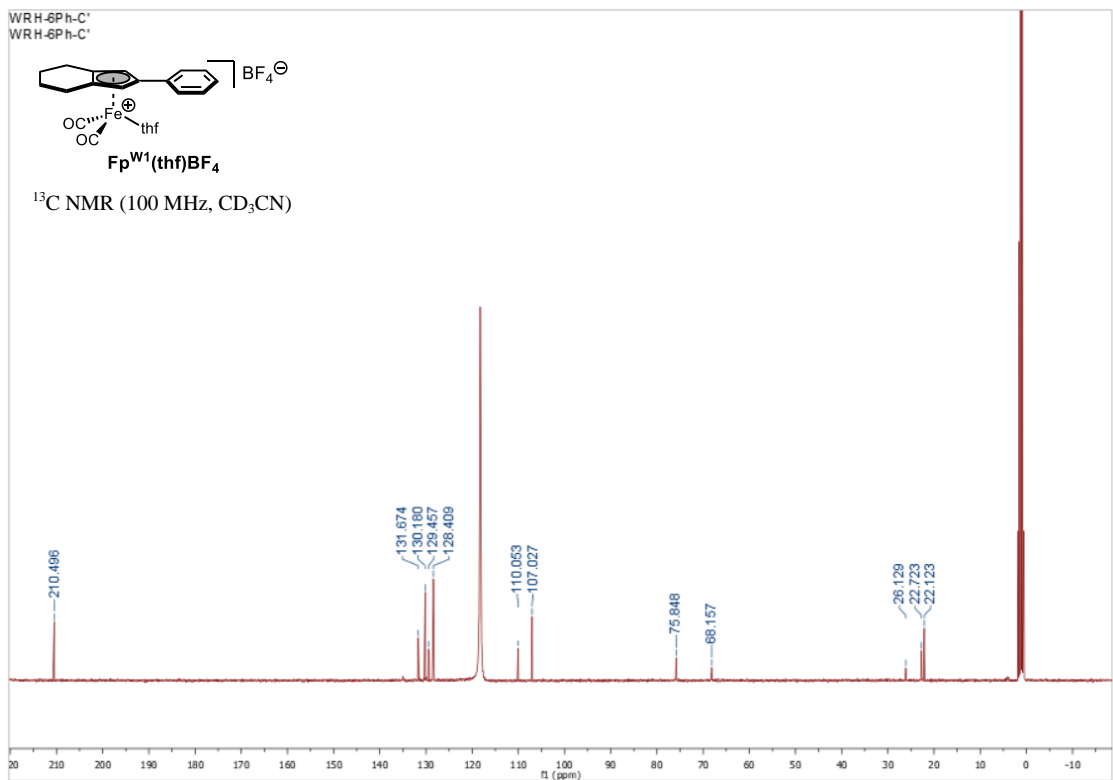



WRH-05-6Ph-F

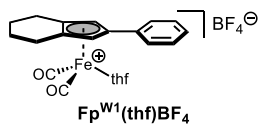

<sup>19</sup>F NMR (376 MHz, CD<sub>3</sub>CN)

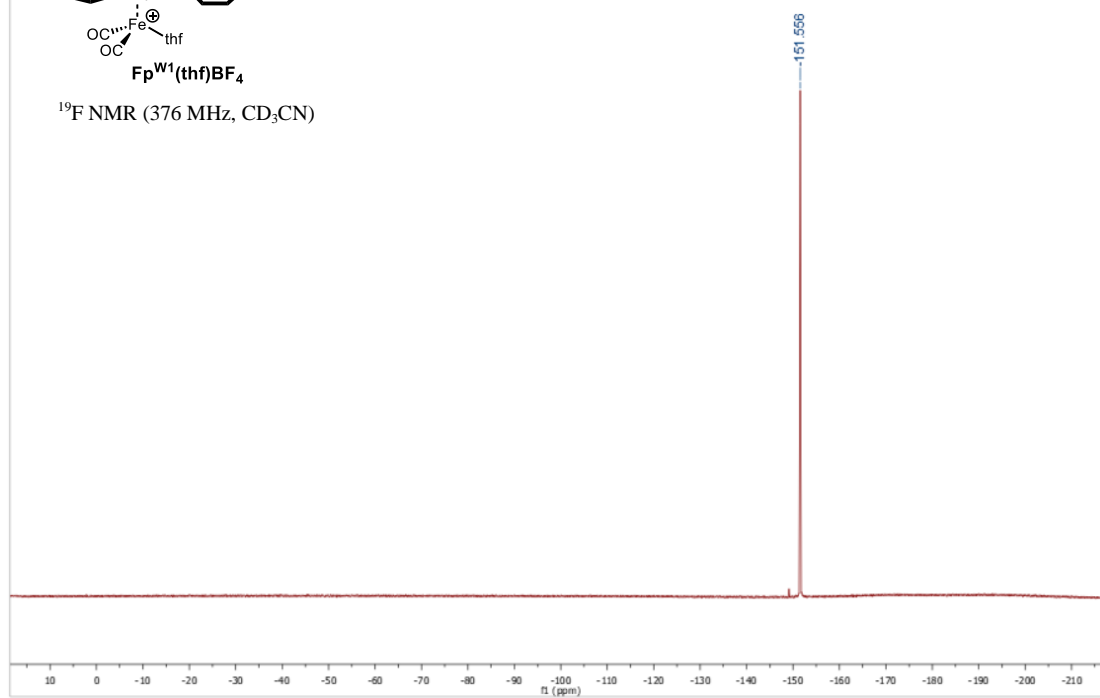

WRH-05-Ph-CD3CN  
WRH-05-Ph-CD3CN

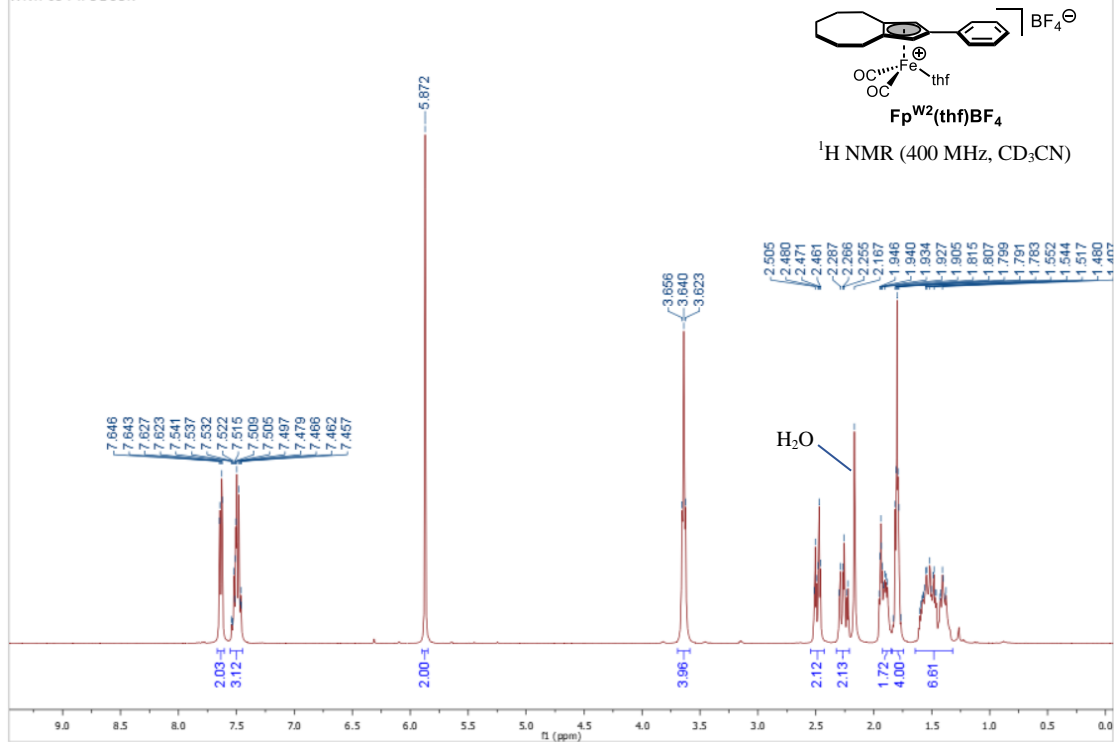

WRH-05-Ph-C

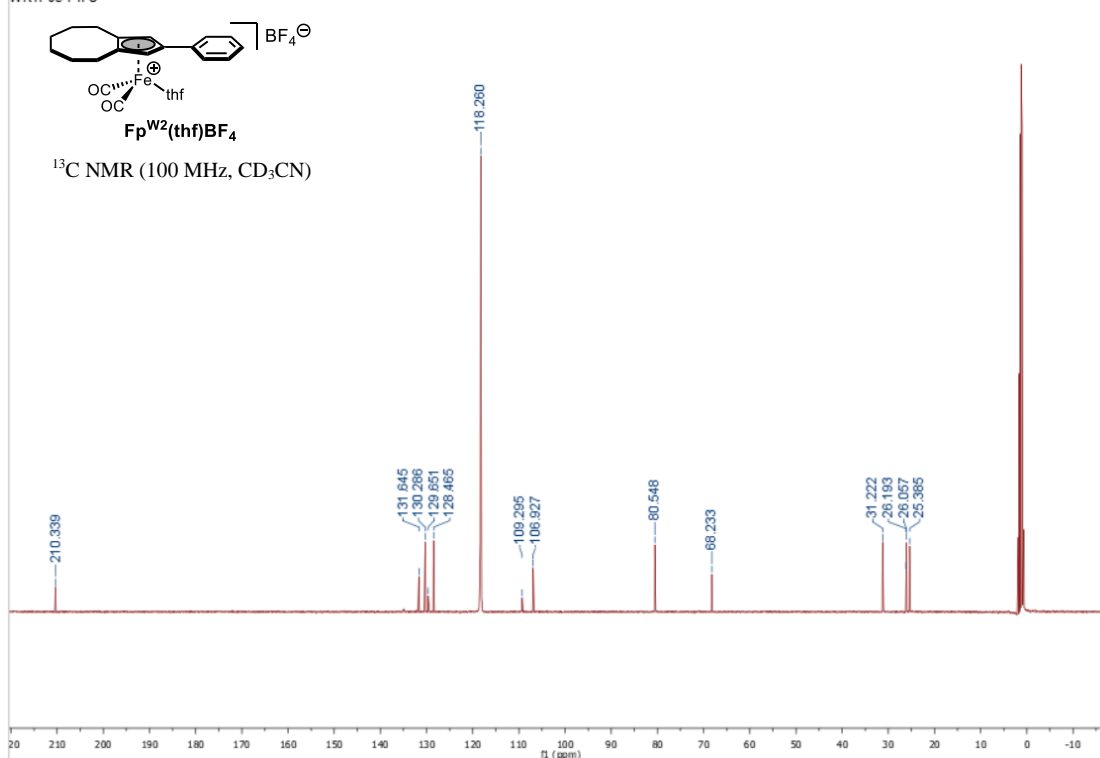

WRH-05-Ph-F

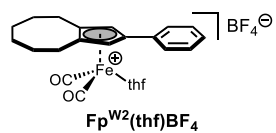

<sup>19</sup>F NMR (376 MHz, CD<sub>3</sub>CN)

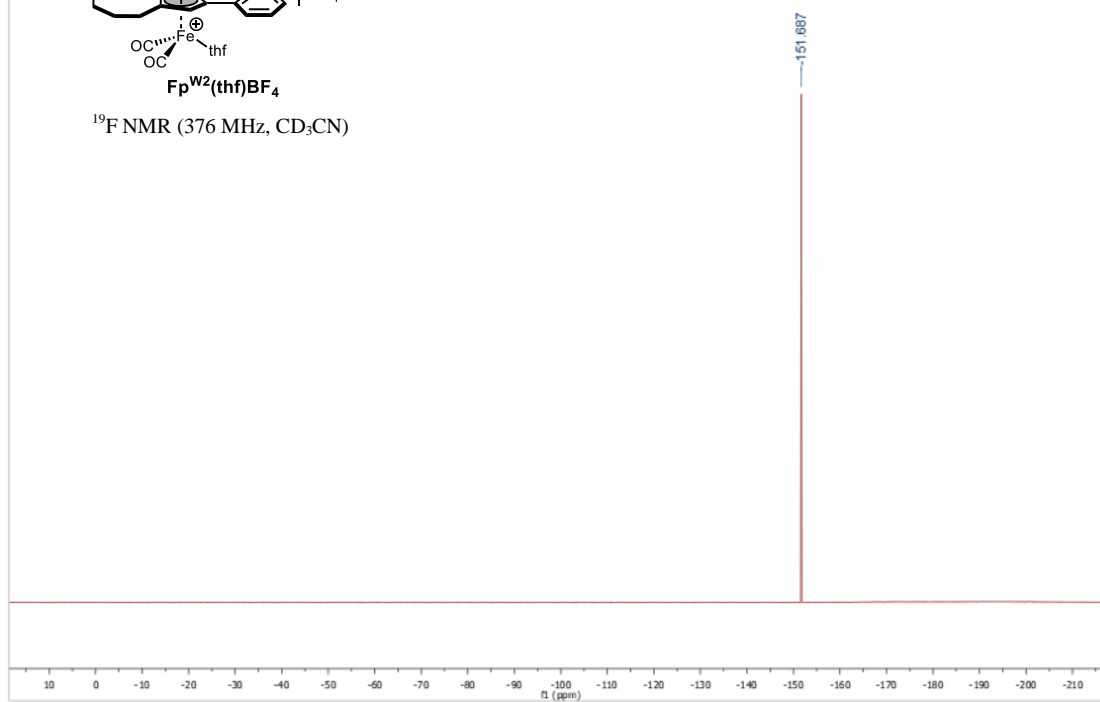

WRH-05-OMe-CD3CN  
WRH-05-OMe

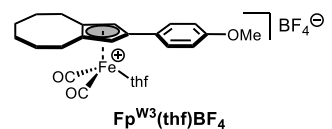

<sup>1</sup>H NMR (400 MHz, CD<sub>3</sub>CN)

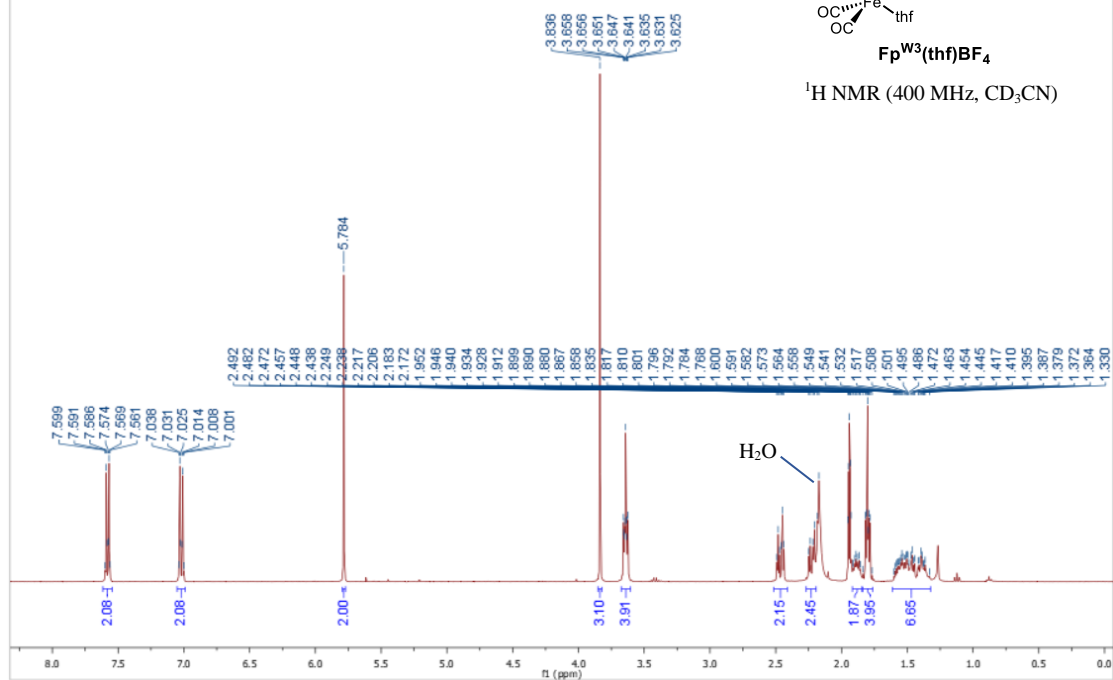

WRH-05-80Me-C

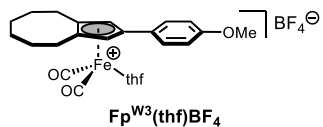

<sup>13</sup>C NMR (100 MHz, CD<sub>3</sub>CN)

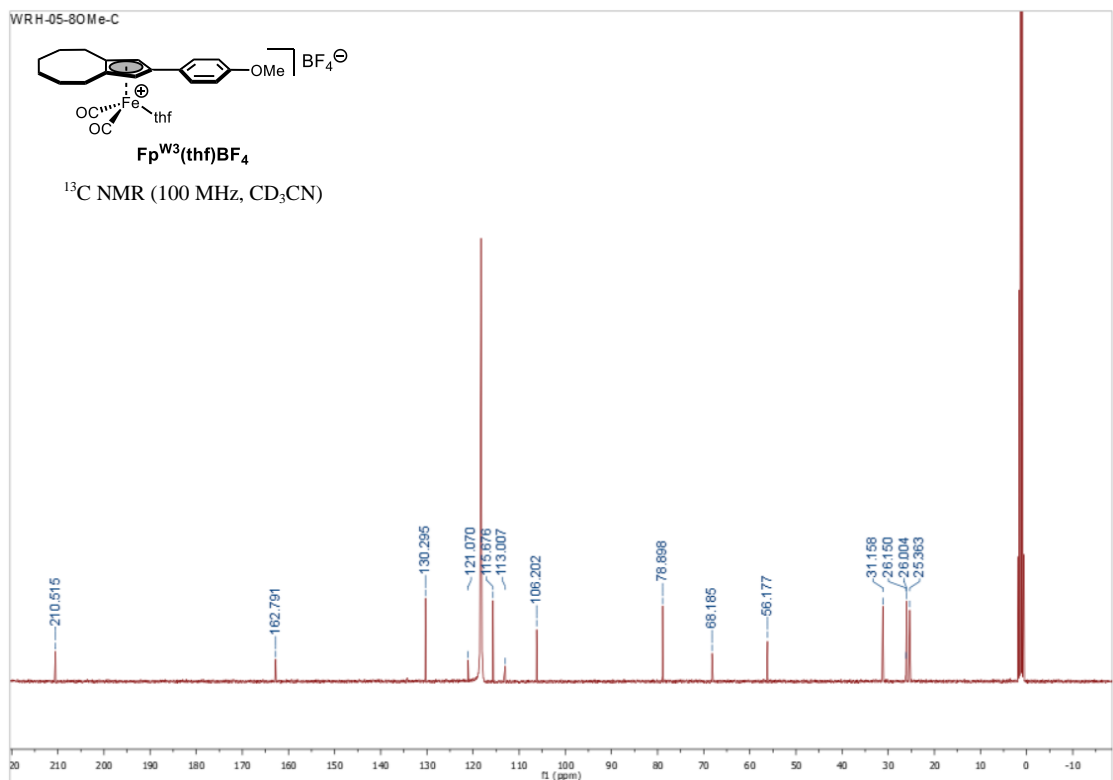

WRH-05-OMe-F

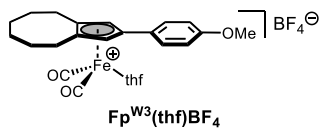

<sup>19</sup>F NMR (376 MHz, CD<sub>3</sub>CN)

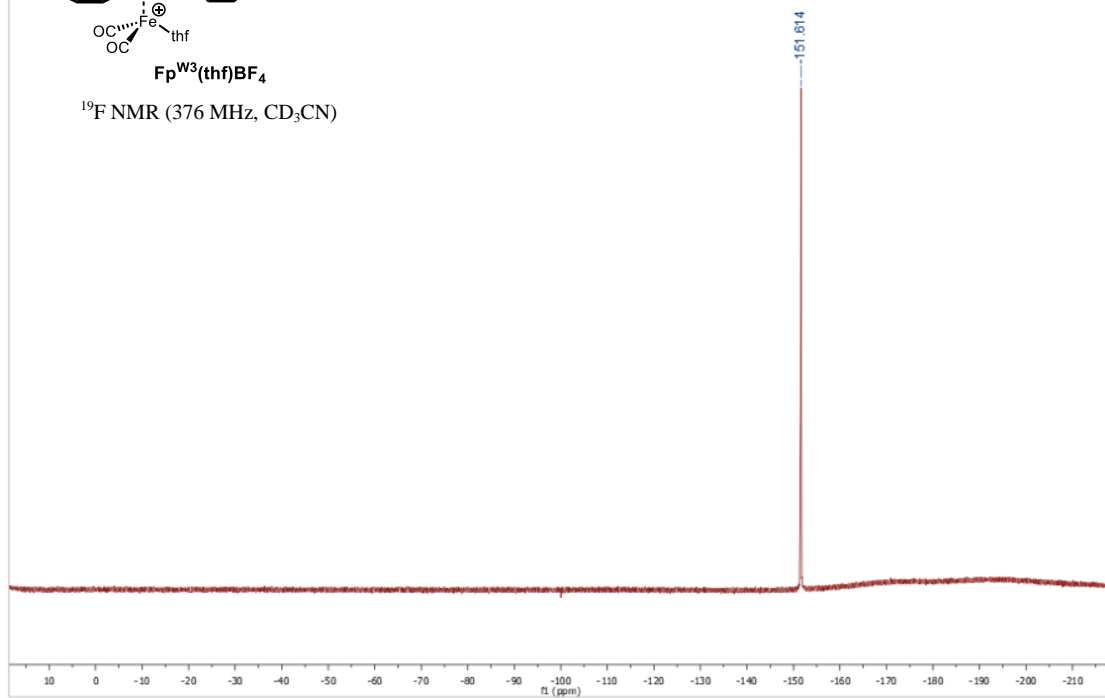

WRH-05-8CF3  
WRH-05-8CF3

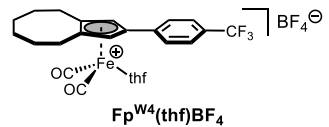

<sup>1</sup>H NMR (400 MHz, CD<sub>3</sub>CN)

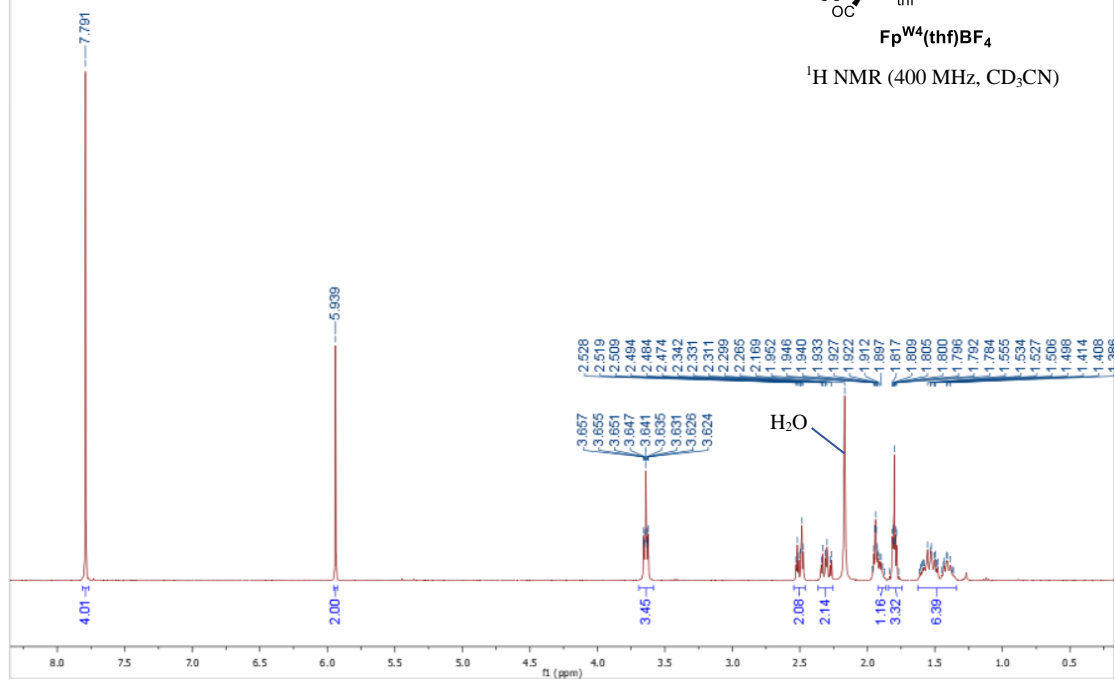

WRH-05-8CF3-C'

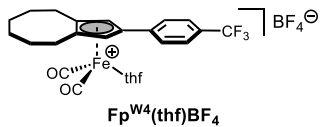

<sup>13</sup>C NMR (100 MHz, CD<sub>3</sub>CN)

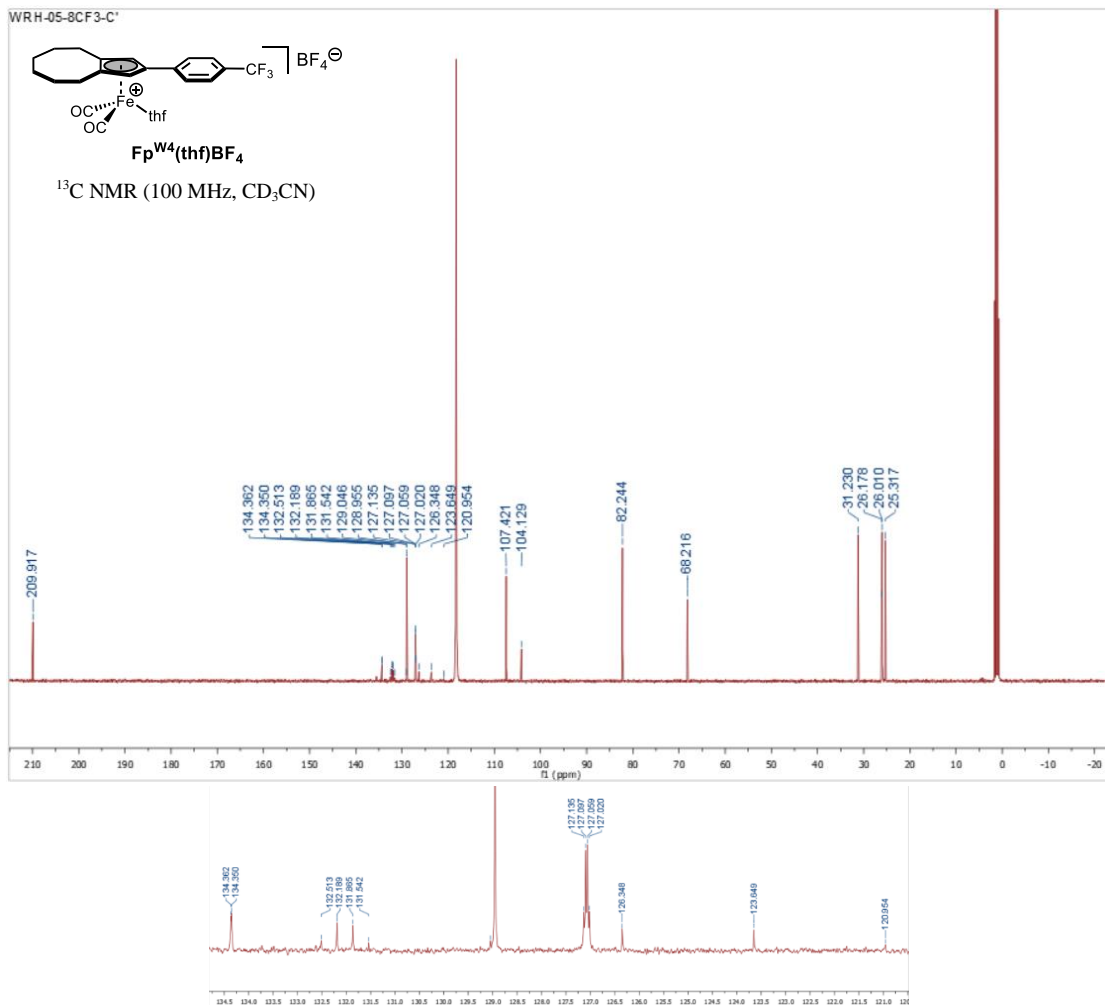

WRH-05-8CF3-F

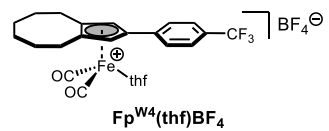

<sup>19</sup>F NMR (376 MHz, CD<sub>3</sub>CN)

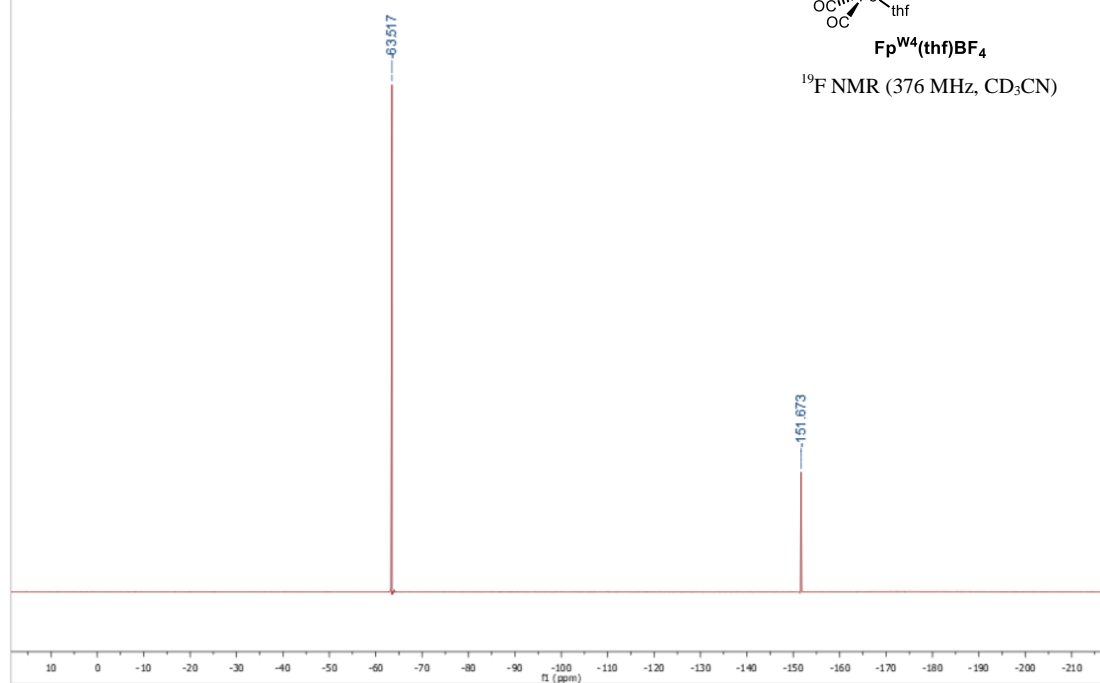

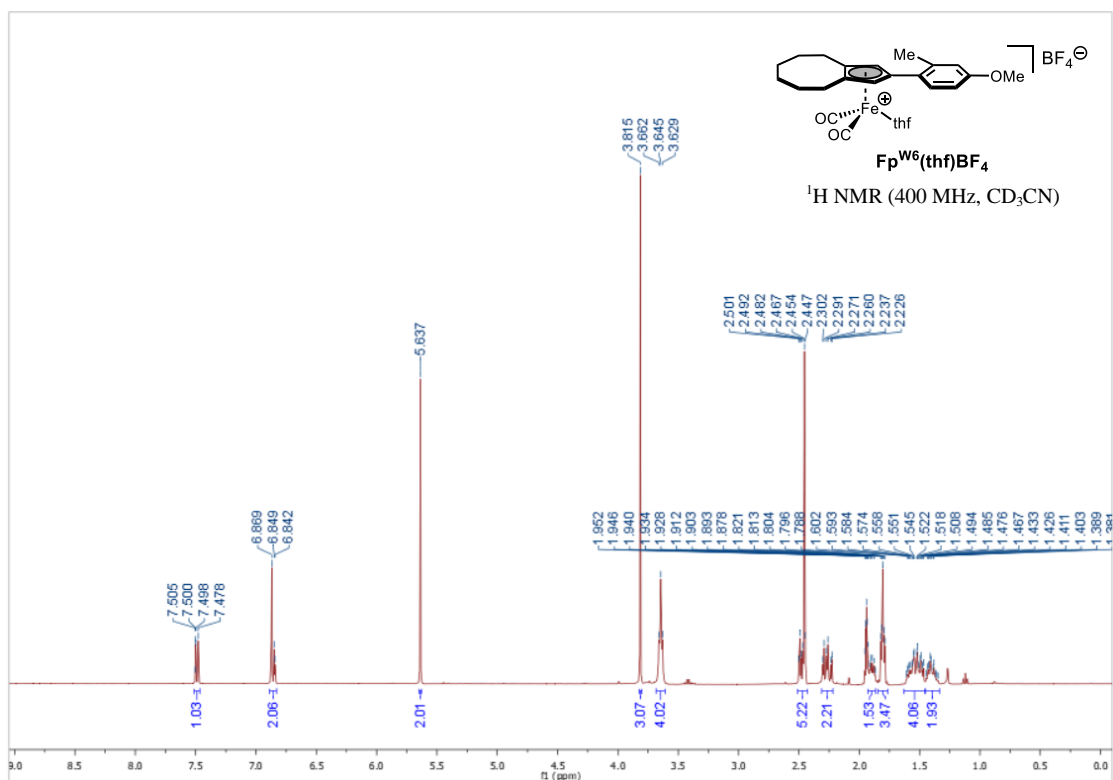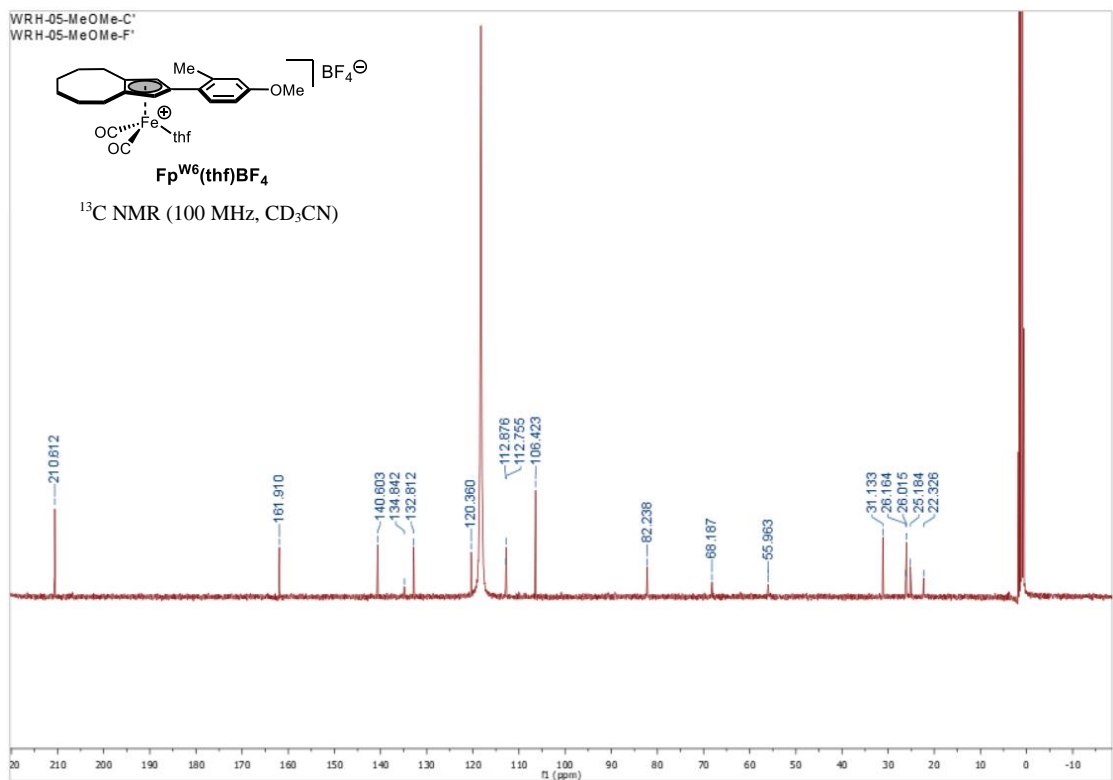



WRH-05-8MeOMe-F

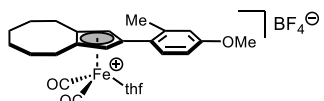

$\text{Fp}^{\text{W6}}(\text{thf})\text{BF}_4$

$^{19}\text{F}$  NMR (376 MHz,  $\text{CD}_3\text{CN}$ )

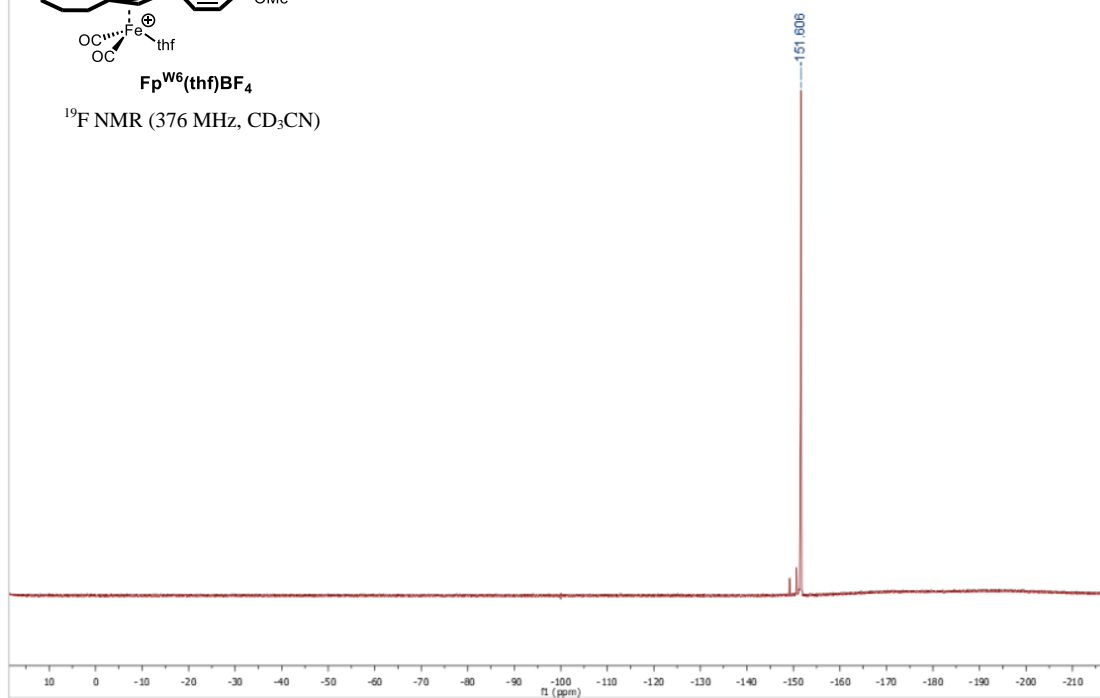

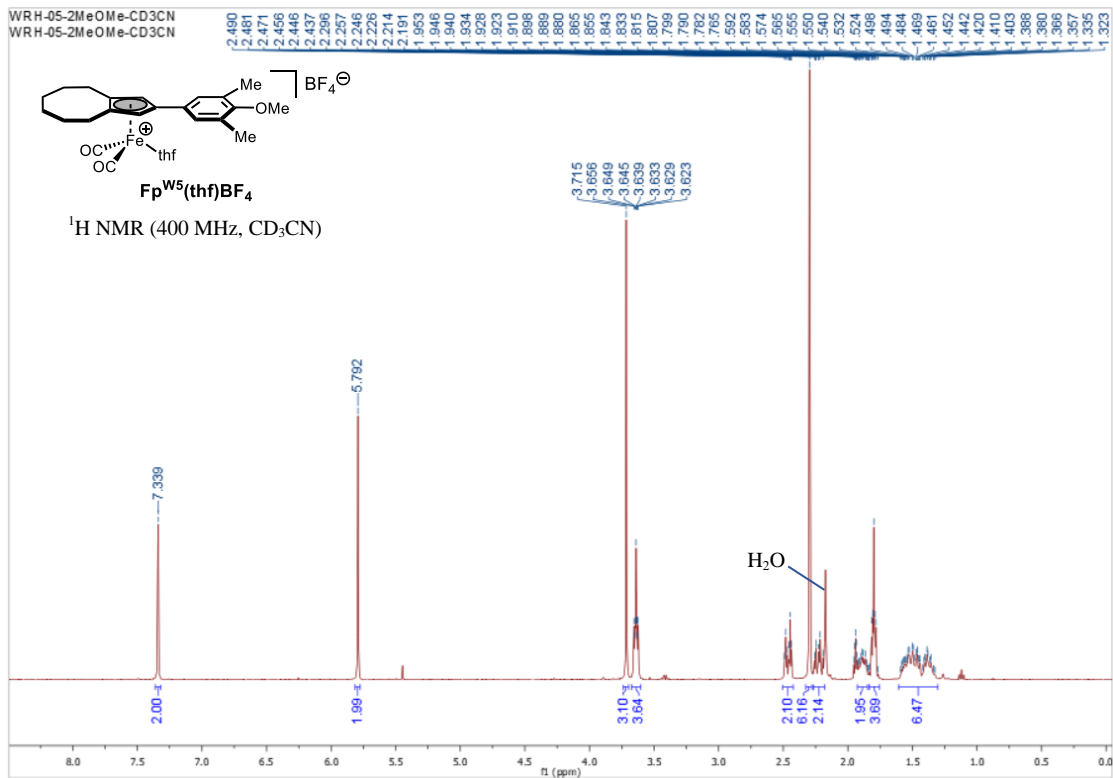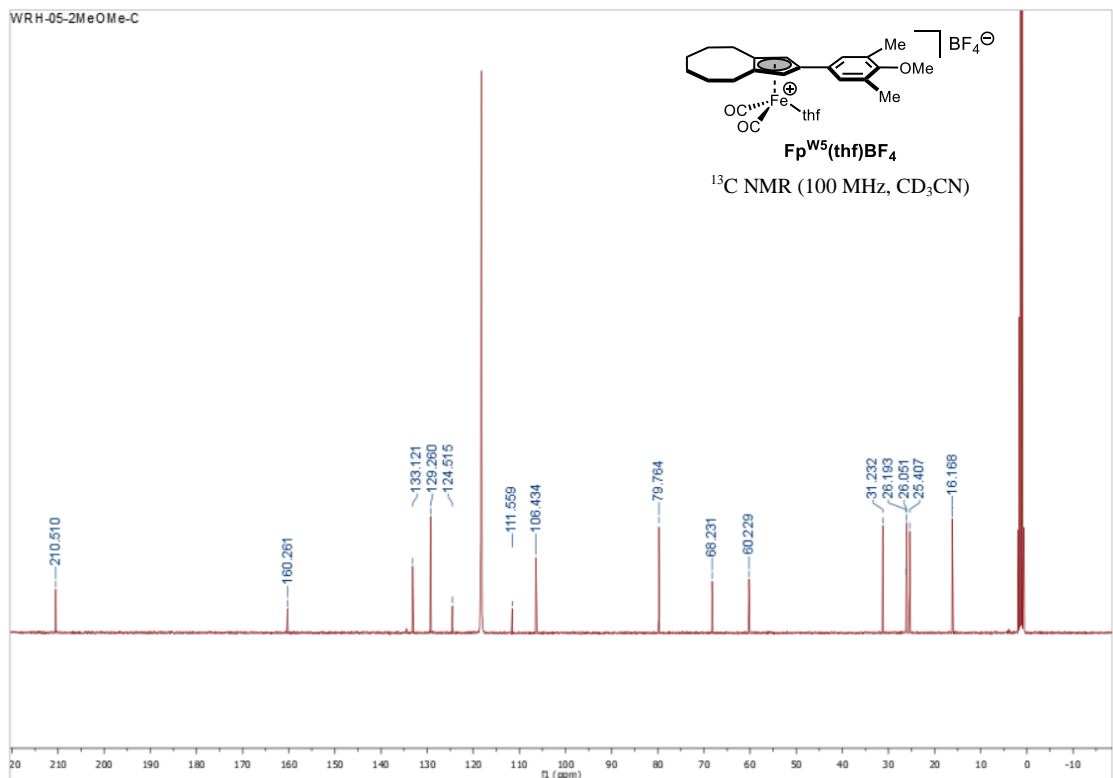

WRH-05-2MeOMe-F

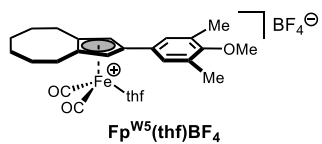

<sup>19</sup>F NMR (376 MHz, CD<sub>3</sub>CN)

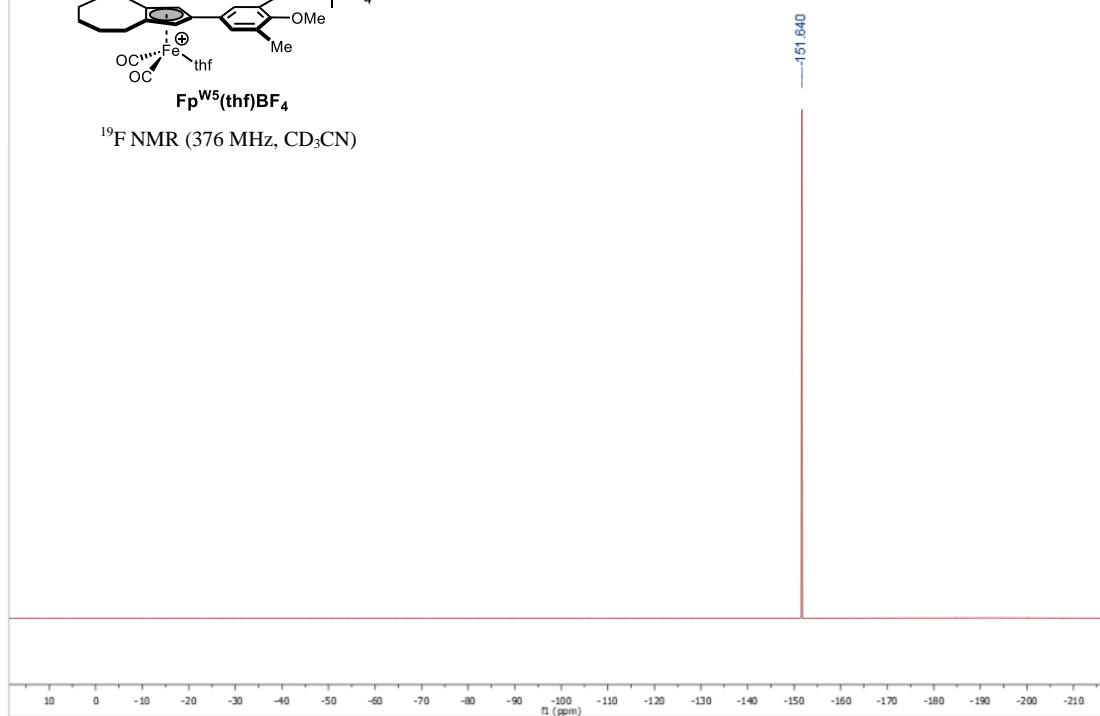

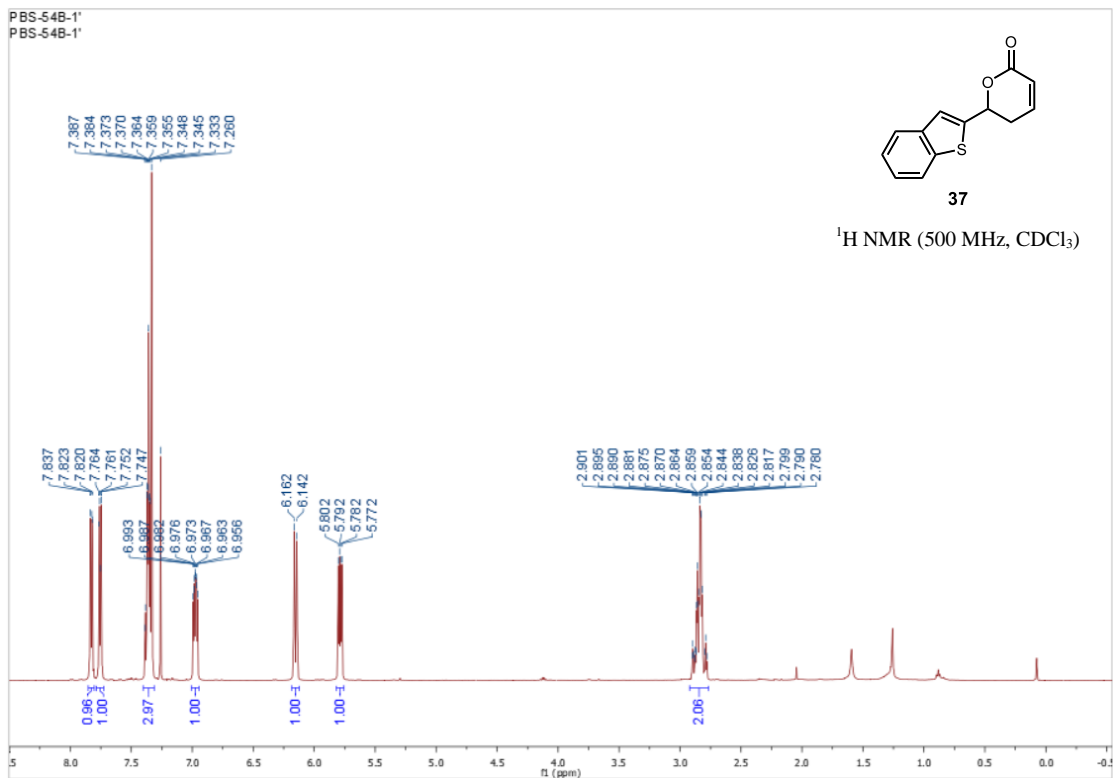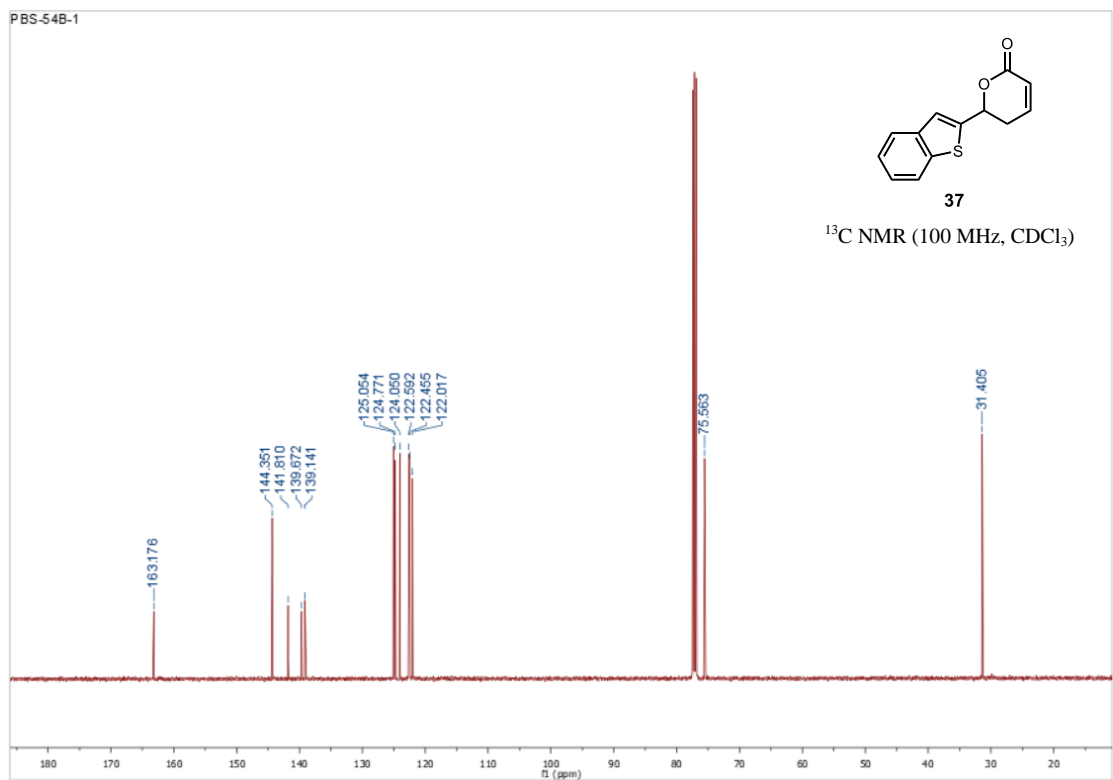

PBS-59A  
PBS-59A

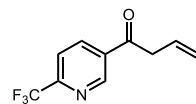

**39-1**

<sup>1</sup>H NMR (500 MHz, CDCl<sub>3</sub>)

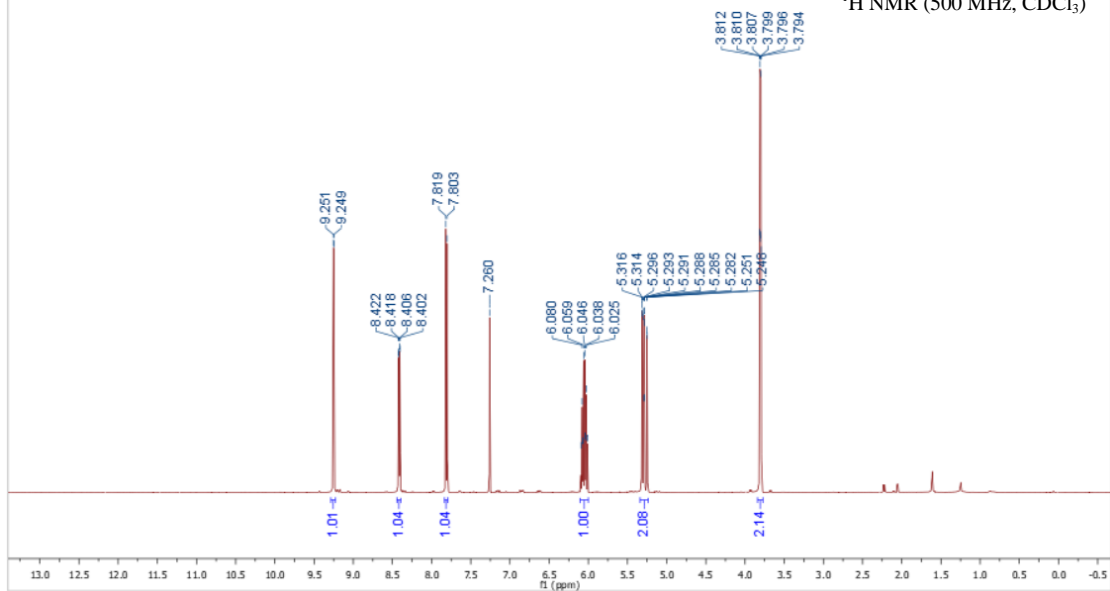

PBS-59A-C

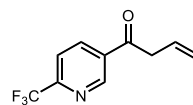

**39-1**

<sup>13</sup>C NMR (125 MHz, CDCl<sub>3</sub>)

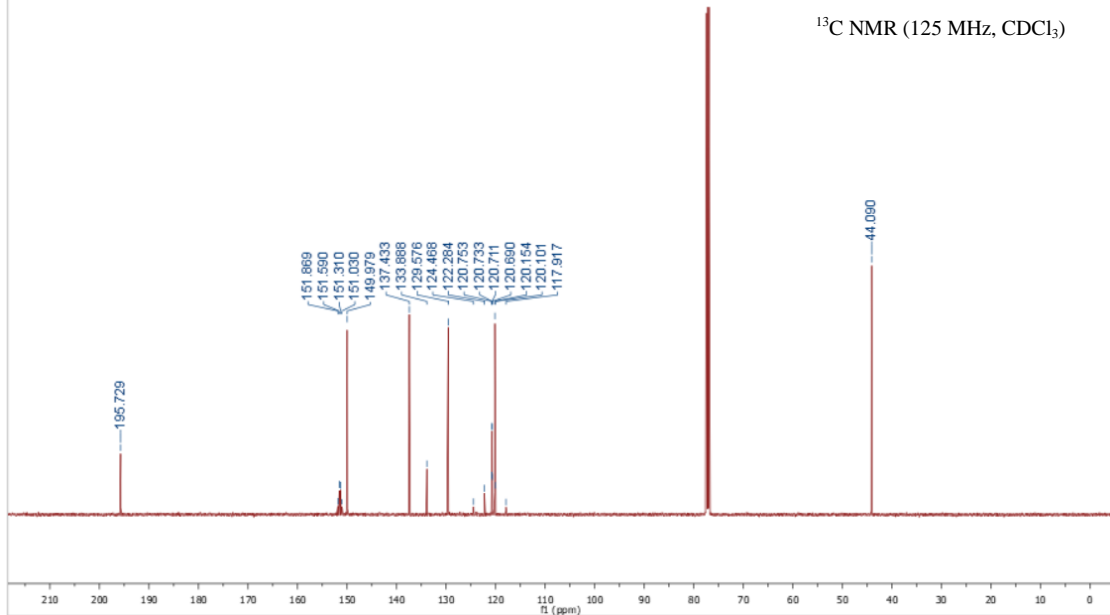

PBS-59A-F

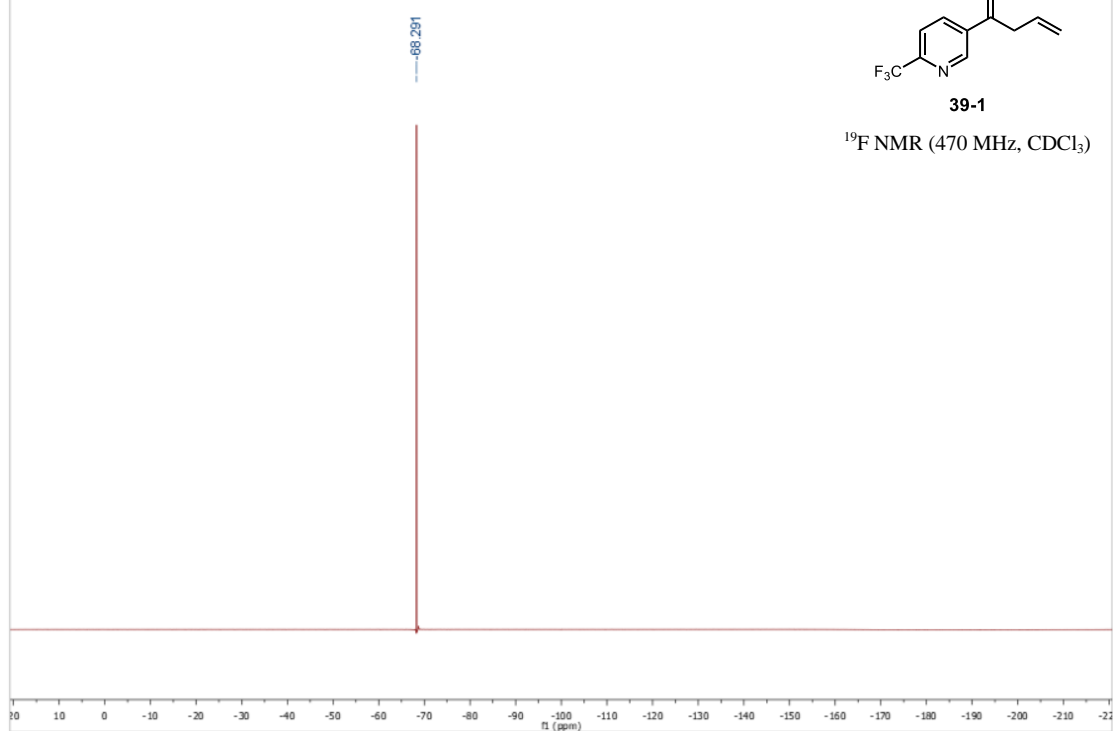

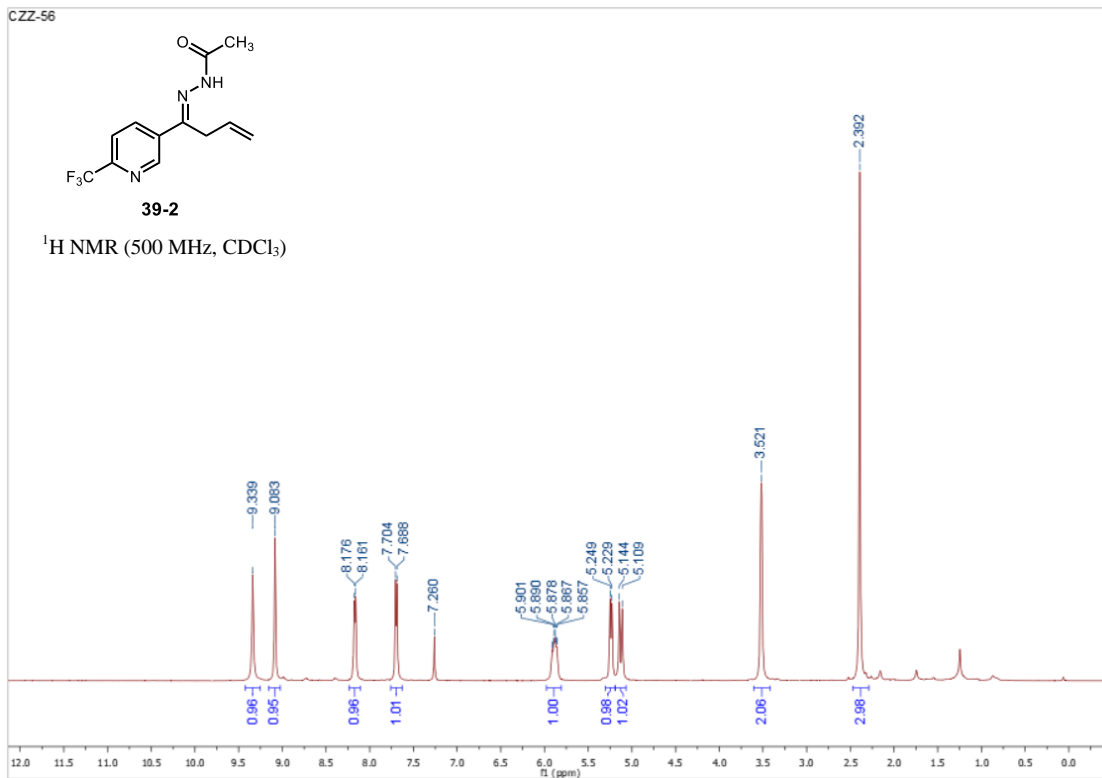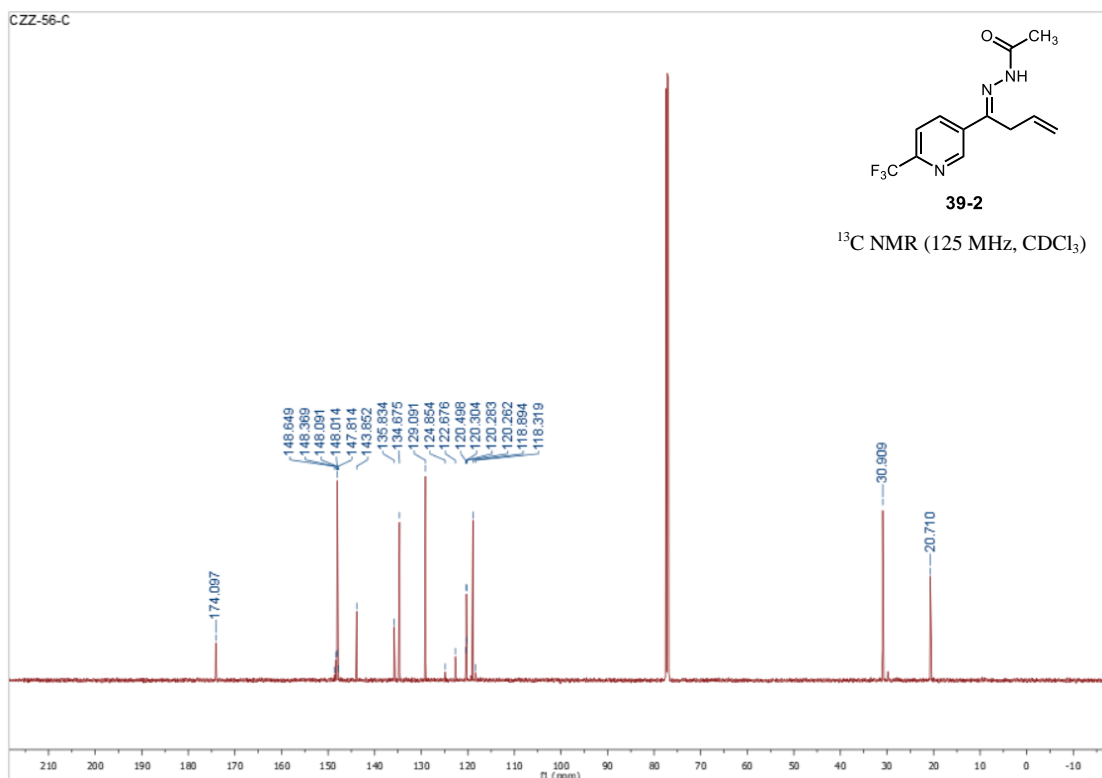

CZZ-56-F

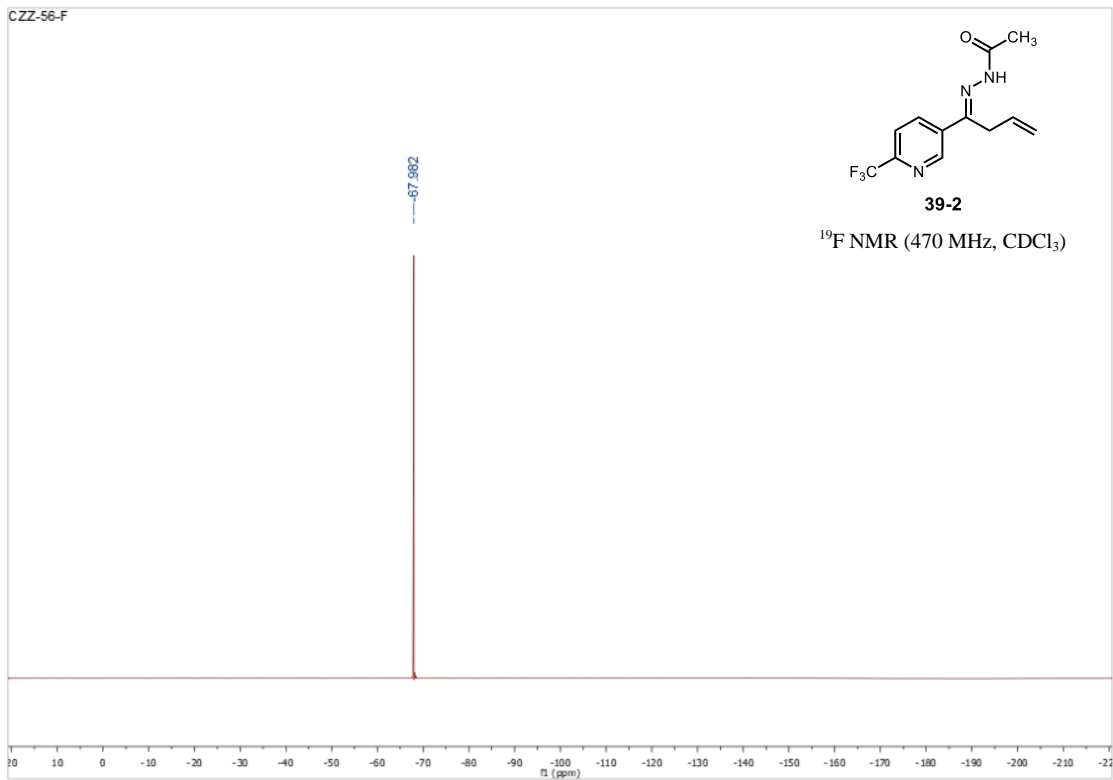



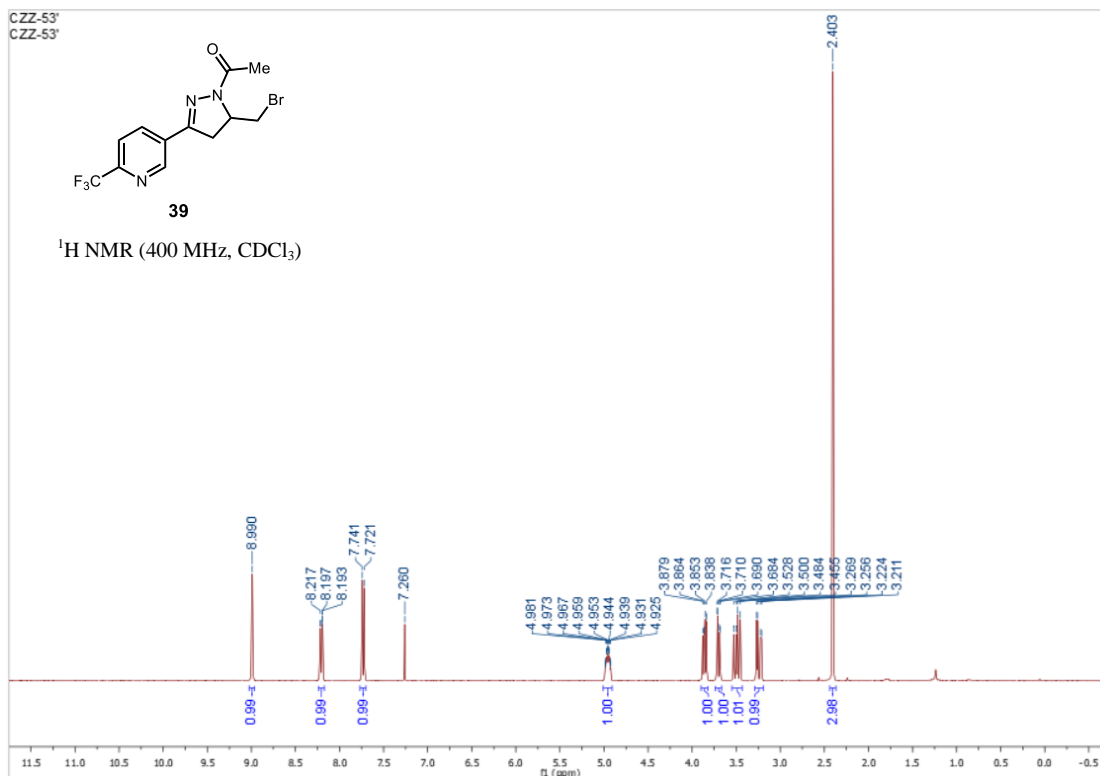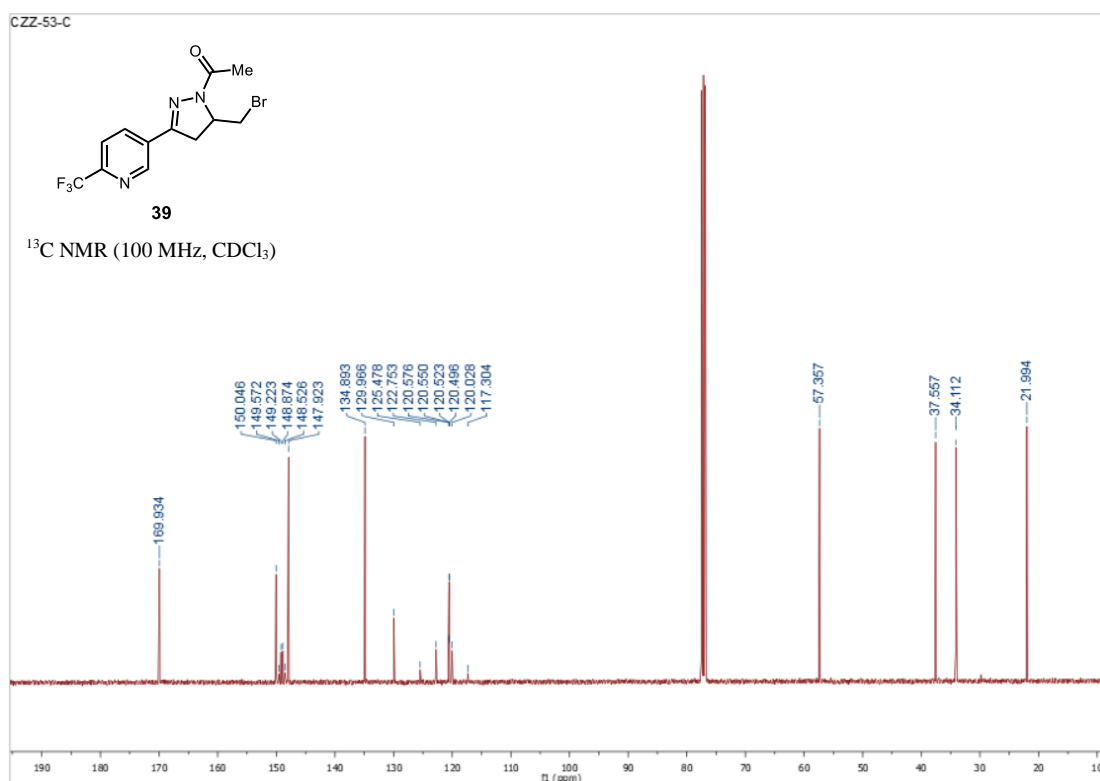

CZZ-53-F\*  
CZZ-53-F\*

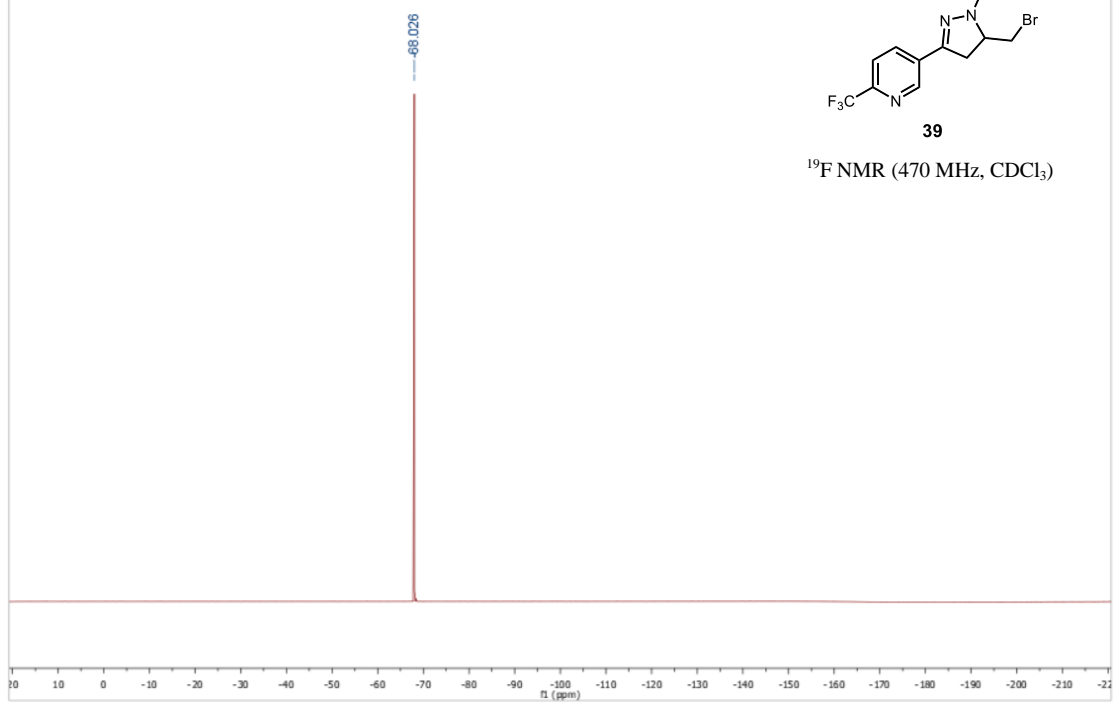

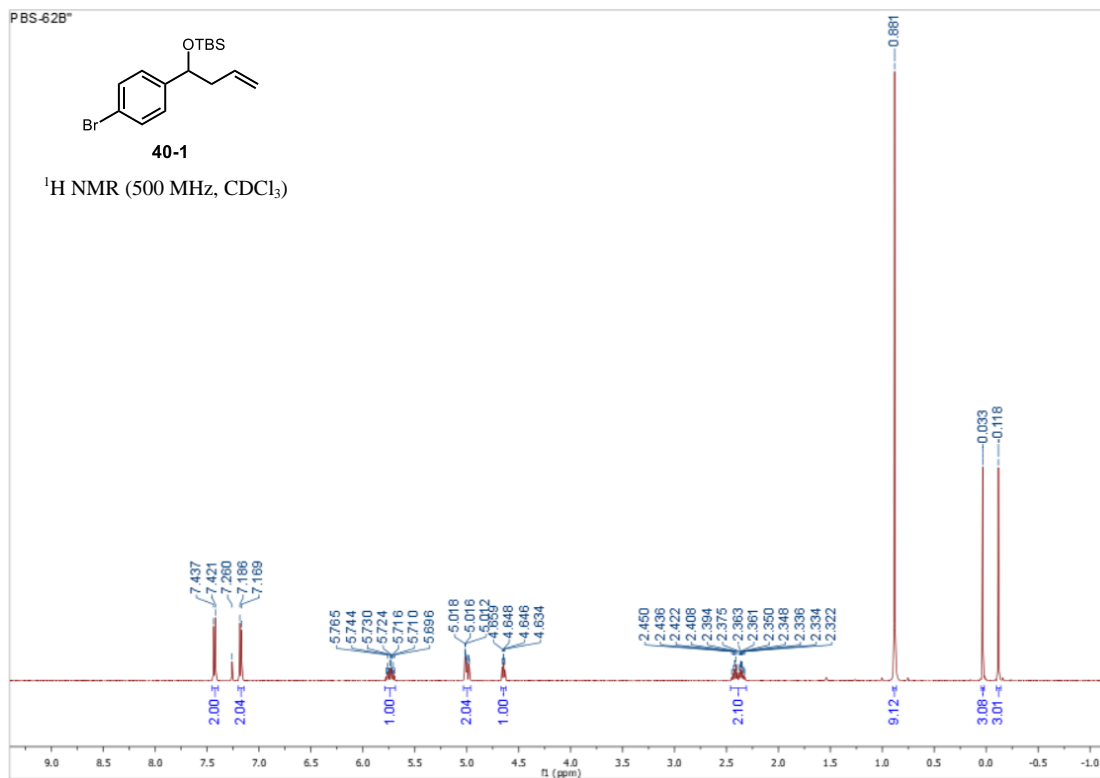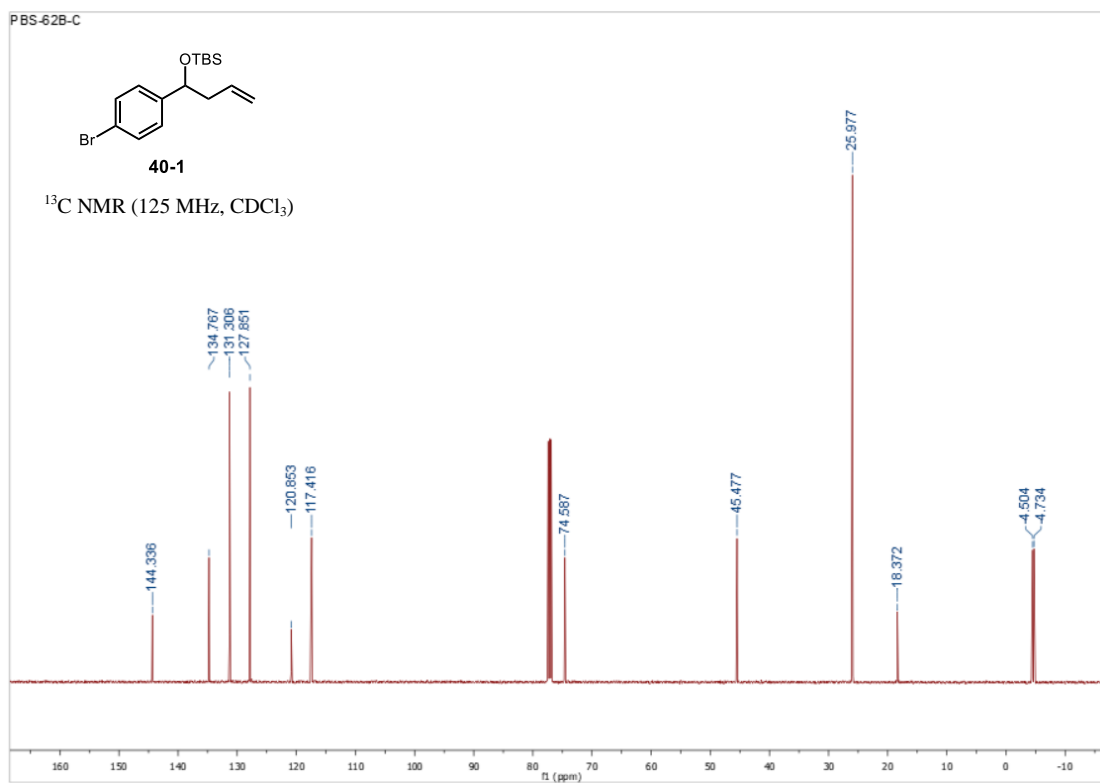

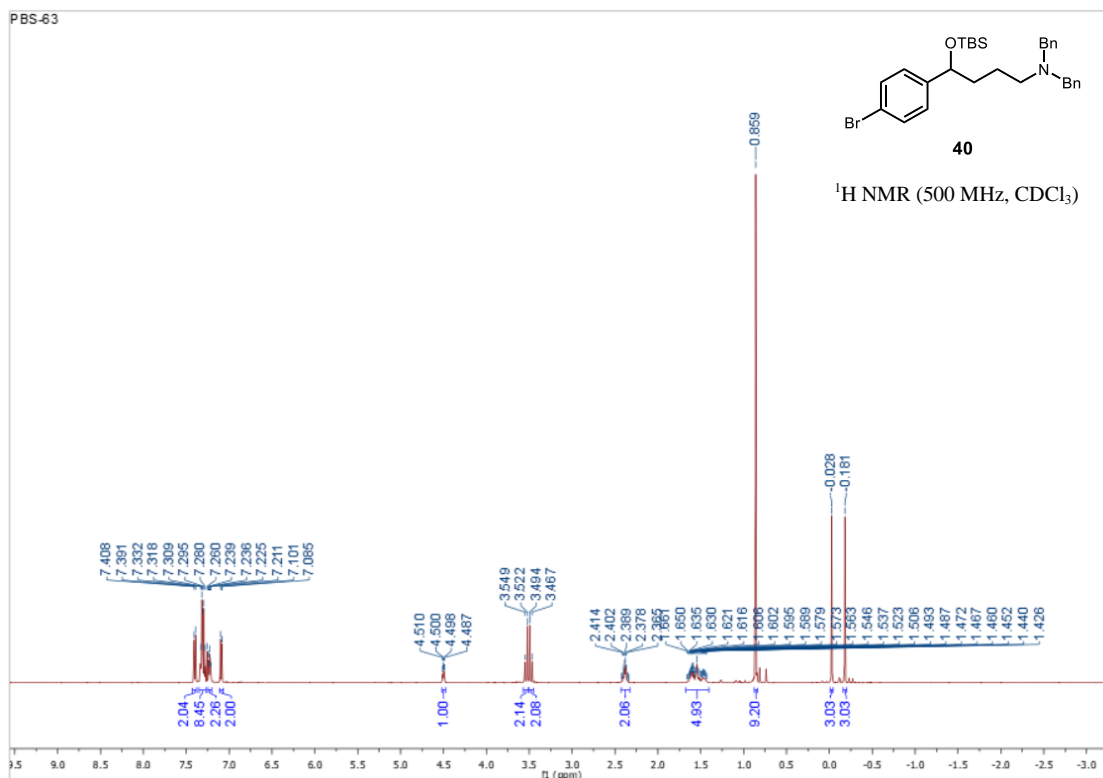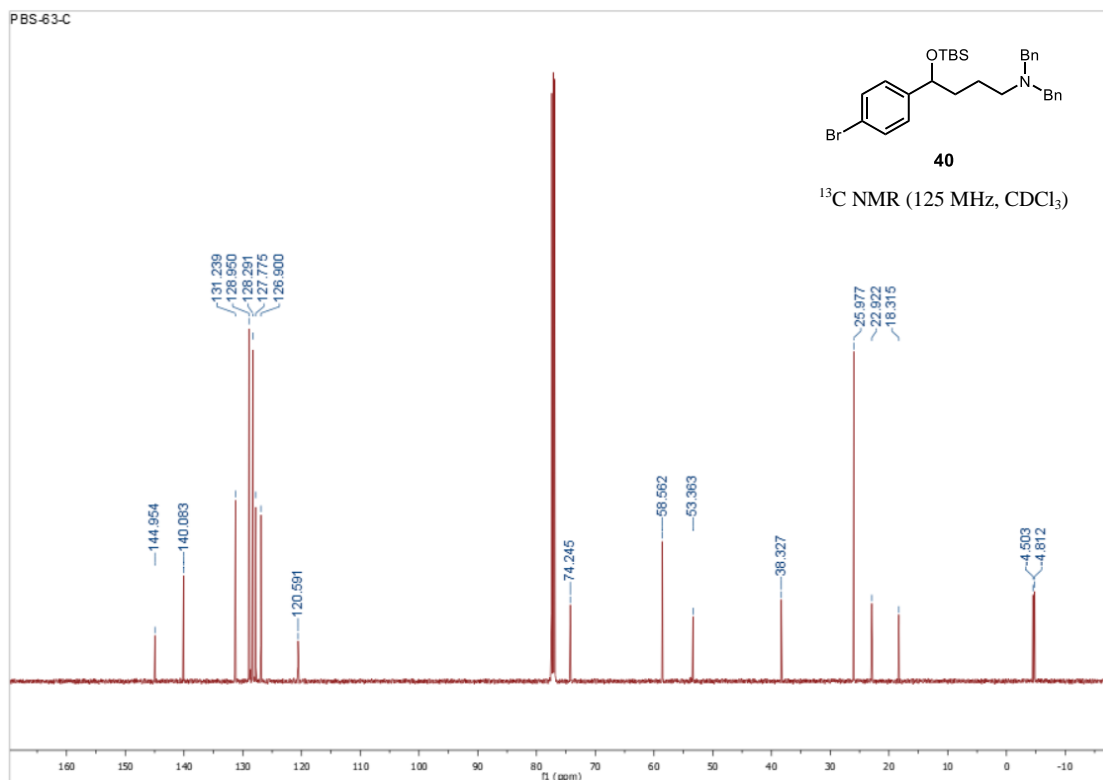

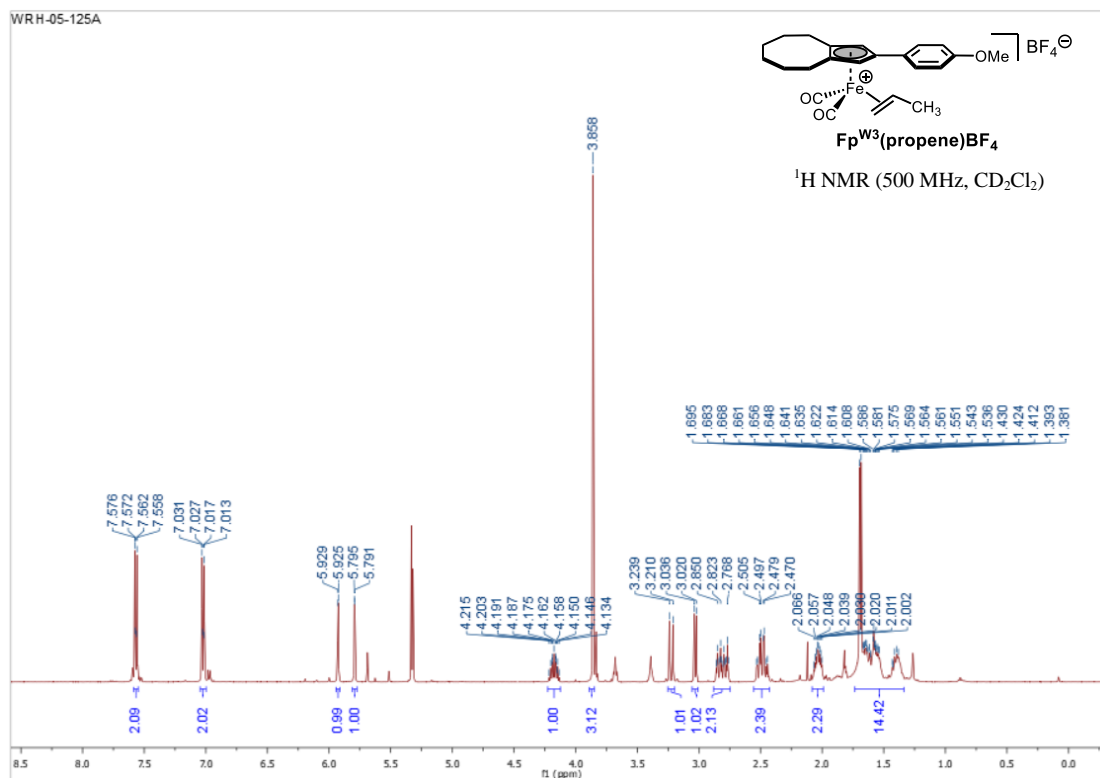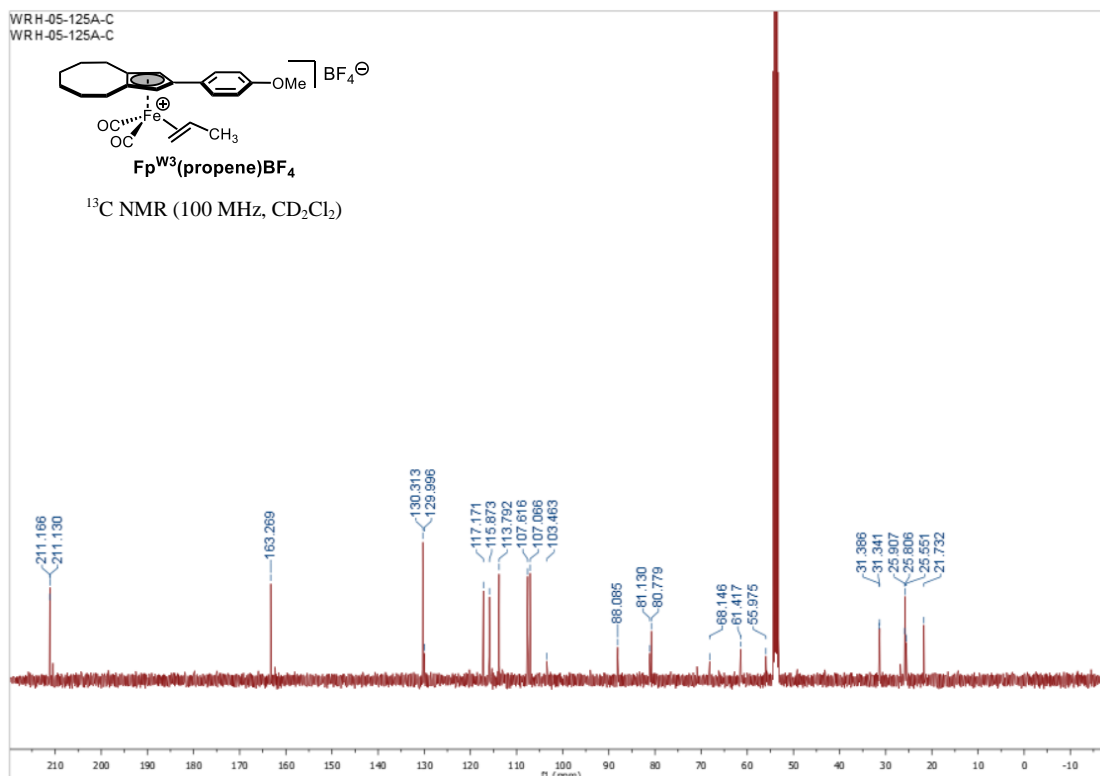

WRH-05-125A-F

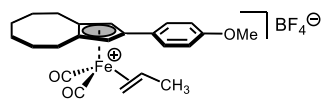

$^{19}\text{F}$  NMR (470 MHz,  $\text{CD}_2\text{Cl}_2$ )

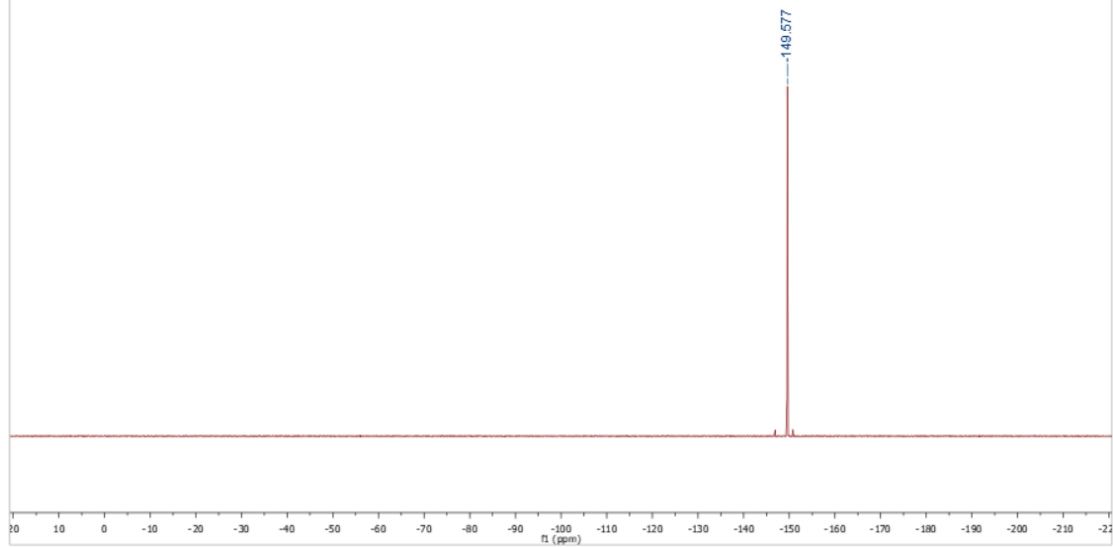

WRH-05-70-1

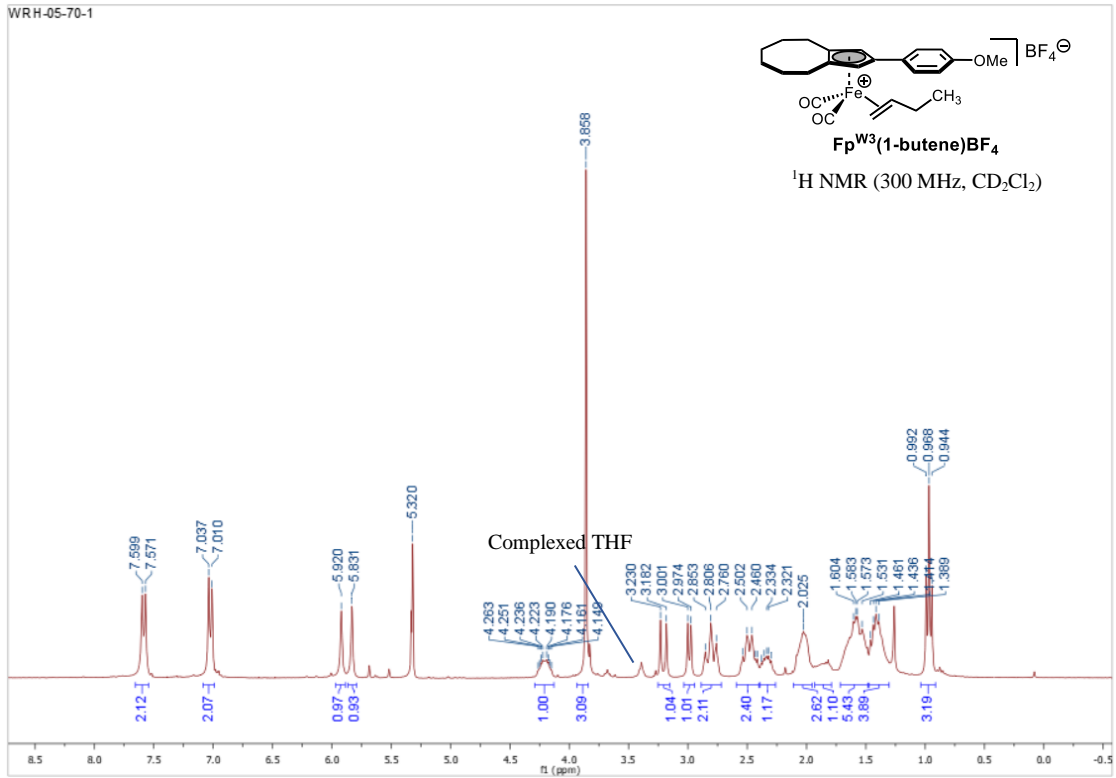

WRH-05-125B-C  
WRH-05-125B-C

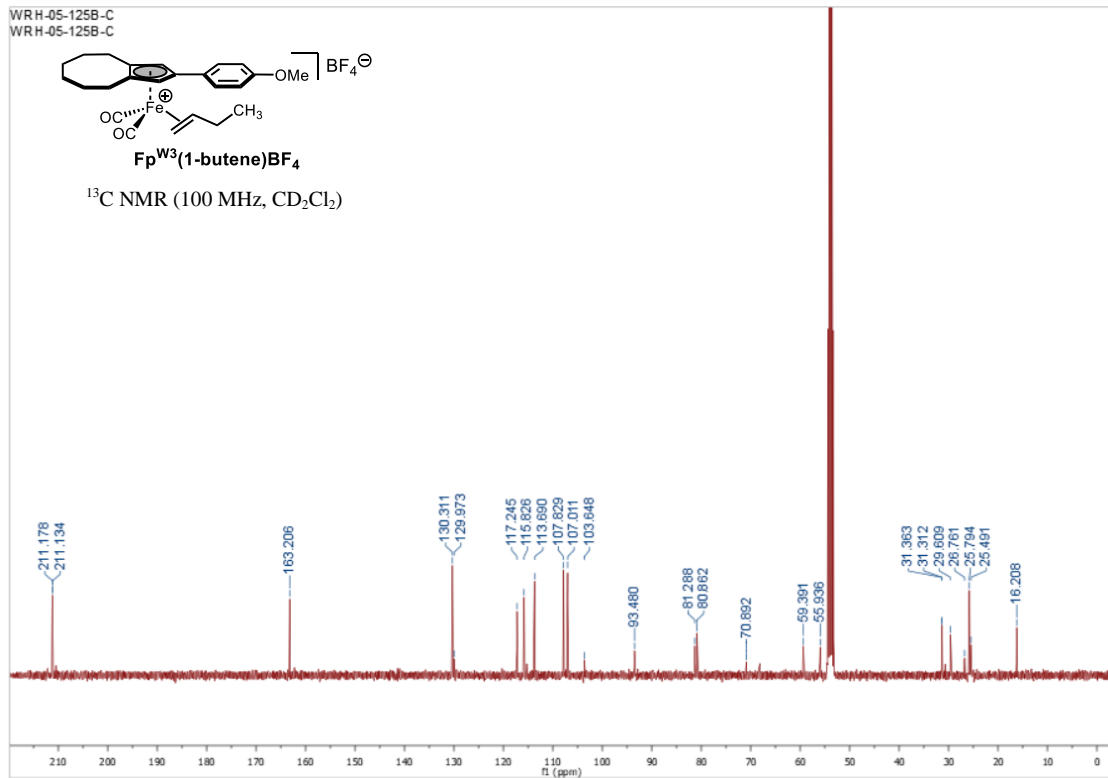

WRH-05-70-1-F

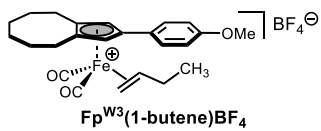

<sup>19</sup>F NMR (282 MHz, CD<sub>2</sub>Cl<sub>2</sub>)

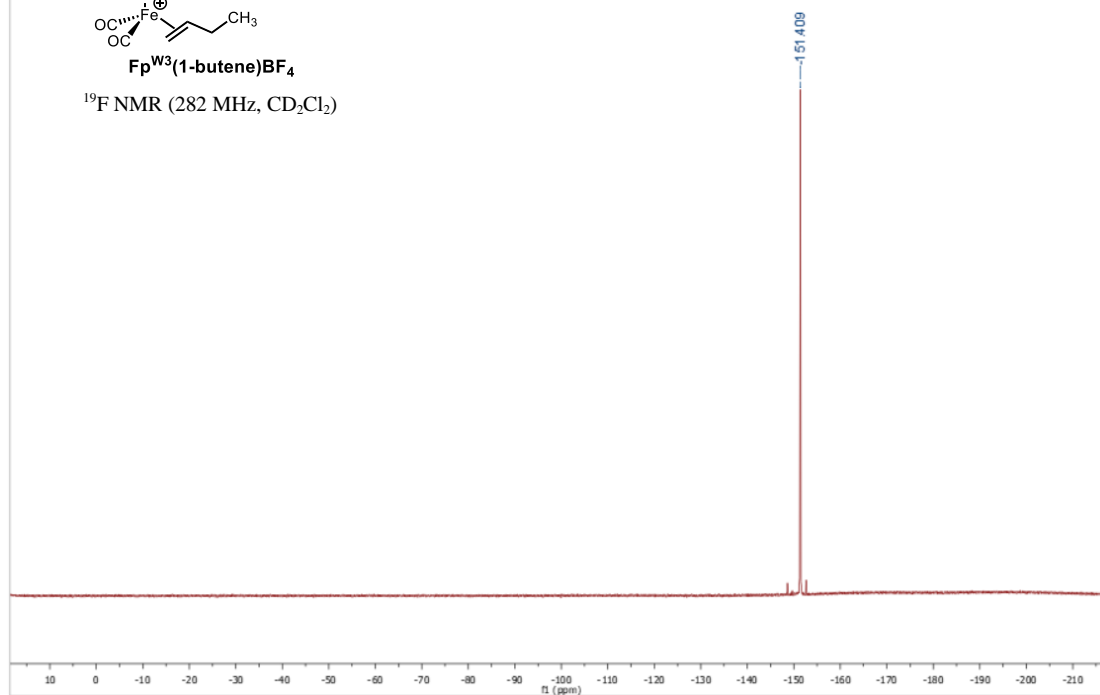



WRH-05-125C

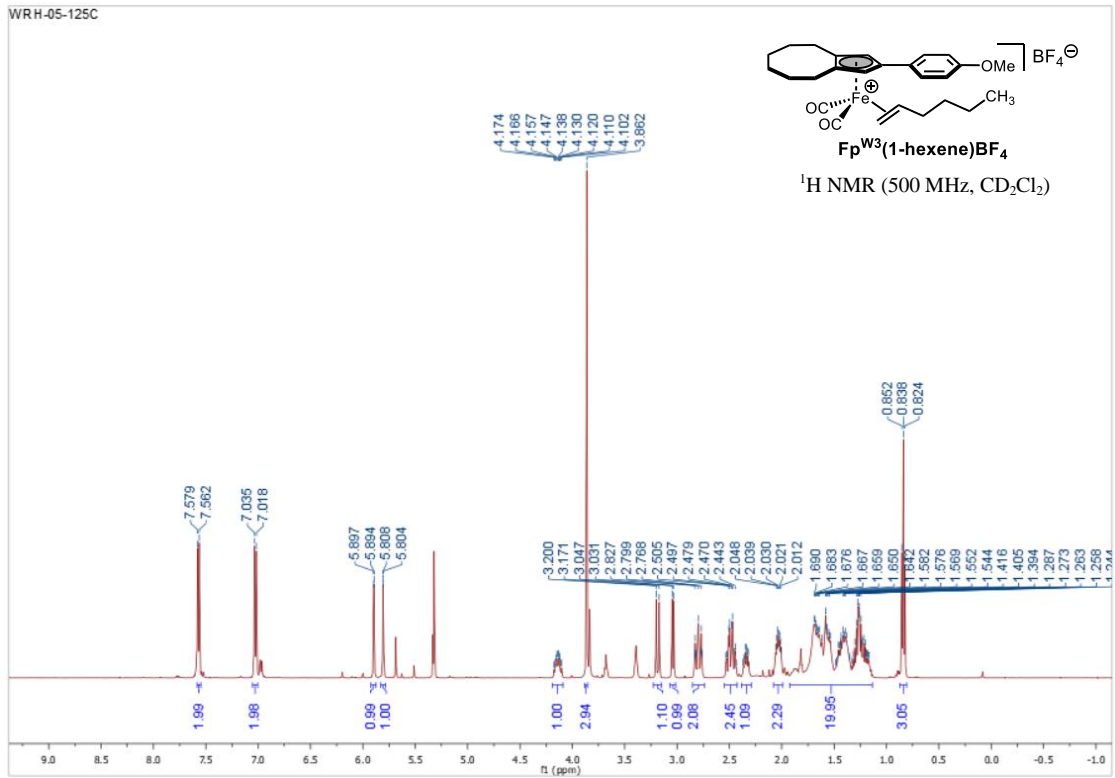

WRH-05-125C-C  
WRH-05-125C-C

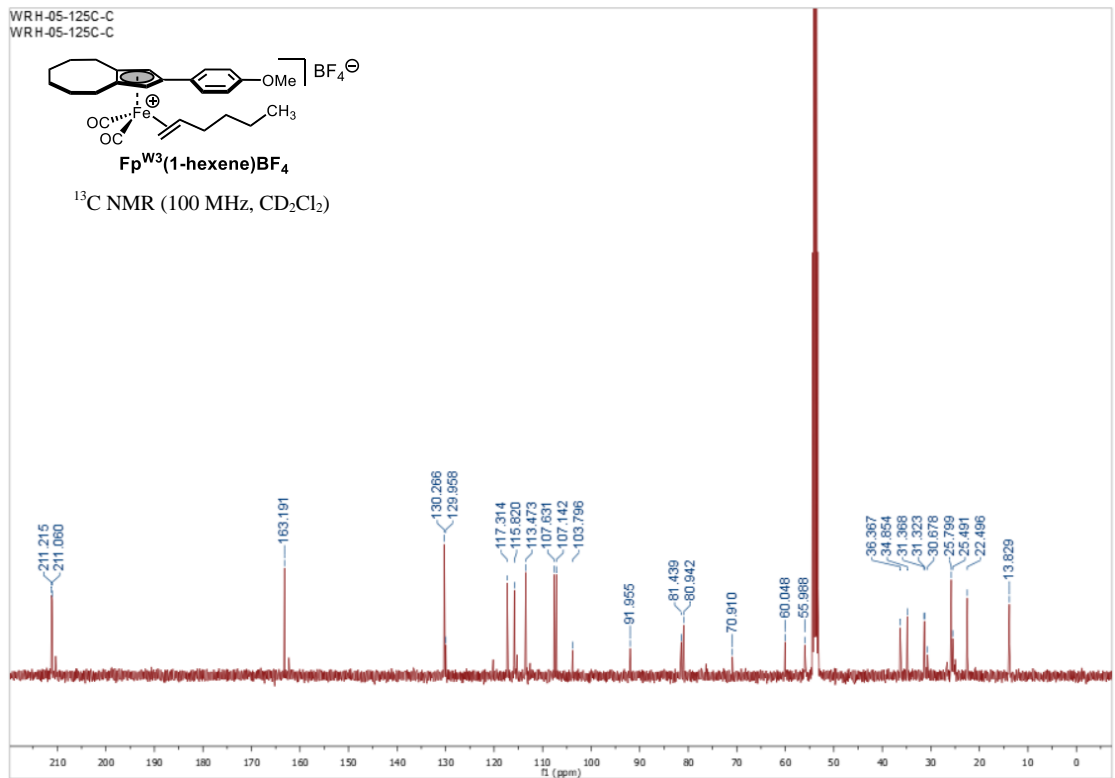

WRH-05-125C-F

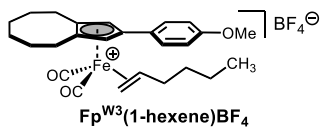

<sup>19</sup>F NMR (470 MHz, CD<sub>2</sub>Cl<sub>2</sub>)

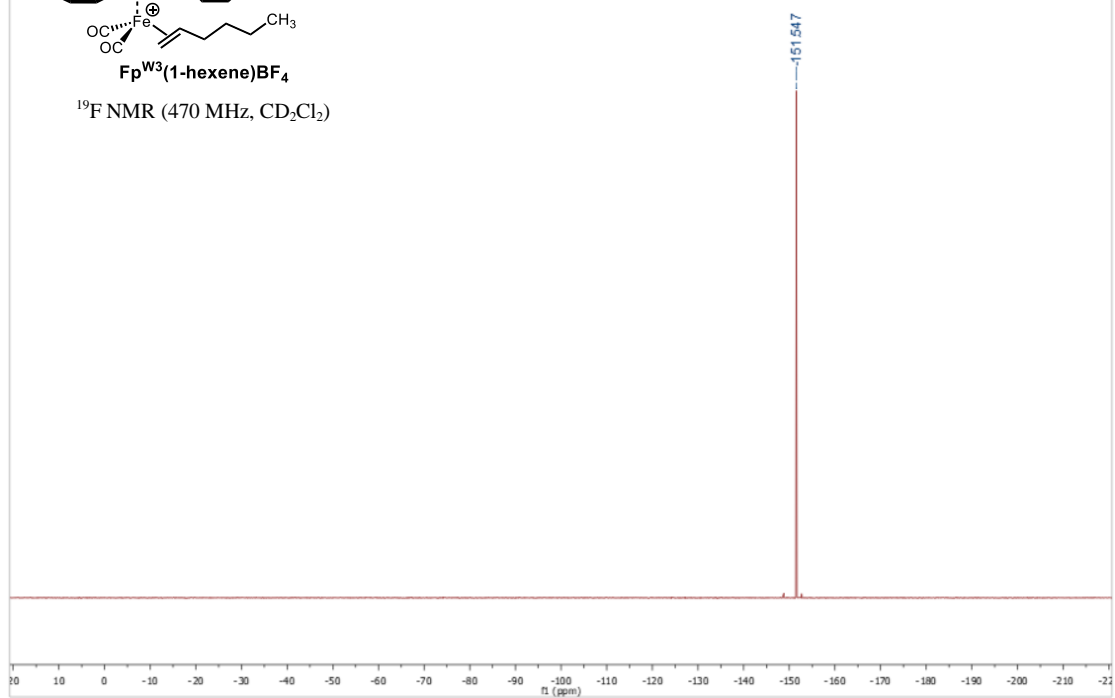

WRH-05-125D

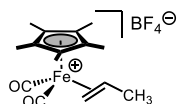

$^1\text{H}$  NMR (500 MHz,  $\text{CD}_2\text{Cl}_2$ )

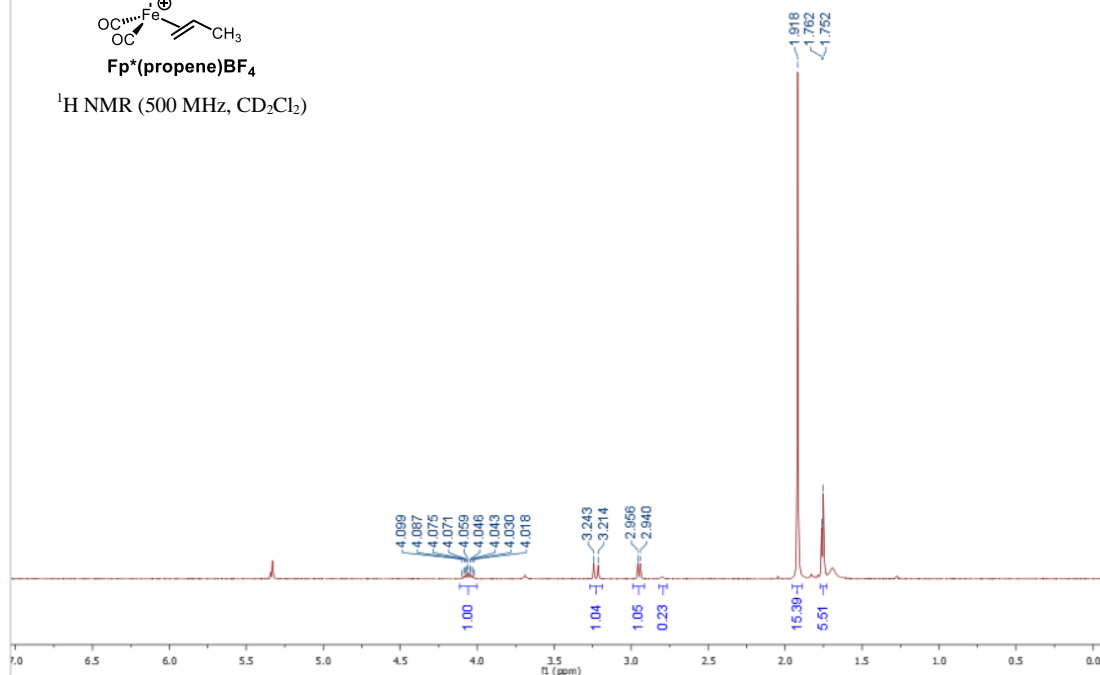

WRH-05-125D-C  
WRH-05-125D-C

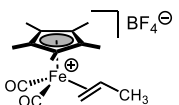

$^{13}\text{C}$  NMR (100 MHz,  $\text{CD}_2\text{Cl}_2$ )

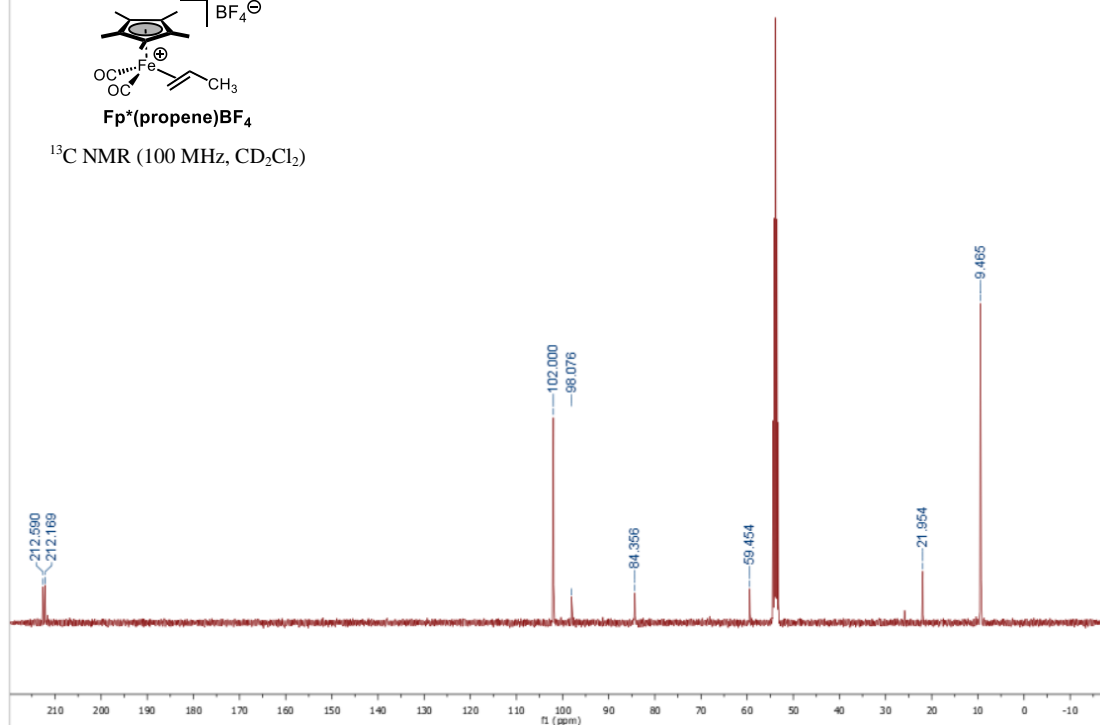

WRH-05-125D-F

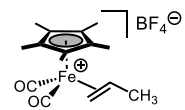

<sup>19</sup>F NMR (470 MHz, CD<sub>2</sub>Cl<sub>2</sub>)

-152.417

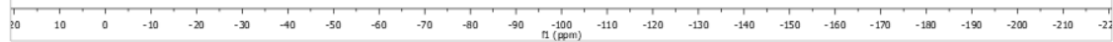

WRH-05-73-2B

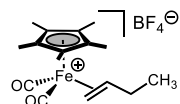

**Fp\*(1-butene)BF<sub>4</sub>**

<sup>1</sup>H NMR (500 MHz, CD<sub>2</sub>Cl<sub>2</sub>)

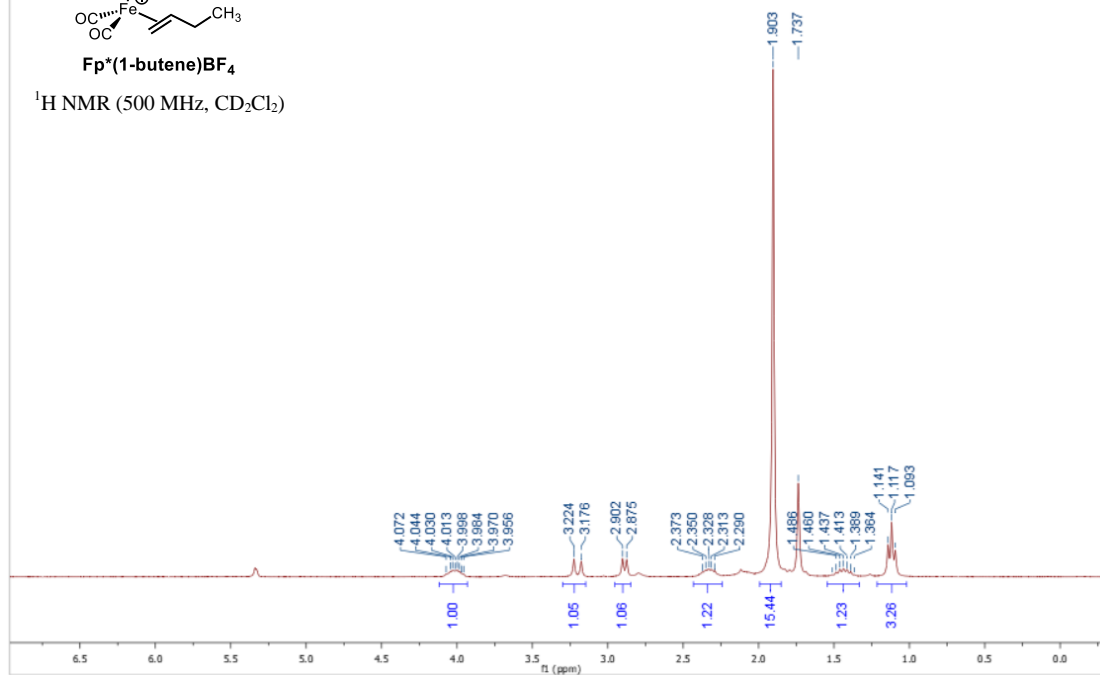

WRH-05-73-2B-C  
WRH-05-73-2B-C

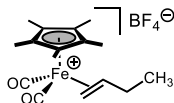

**Fp\*(1-butene)BF<sub>4</sub>**

<sup>13</sup>C NMR (100 MHz, CD<sub>2</sub>Cl<sub>2</sub>)

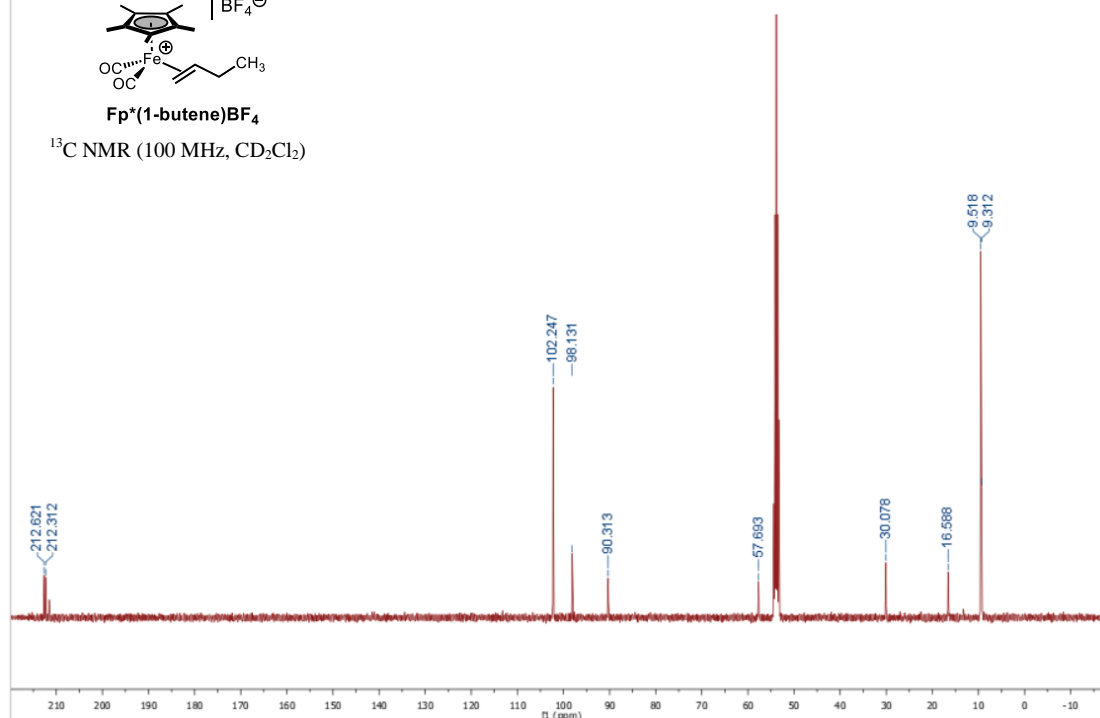

WRH-05-73-2B-F

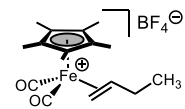

**Fp\*(1-butene)BF<sub>4</sub>**

<sup>19</sup>F NMR (282 MHz, CD<sub>2</sub>Cl<sub>2</sub>)

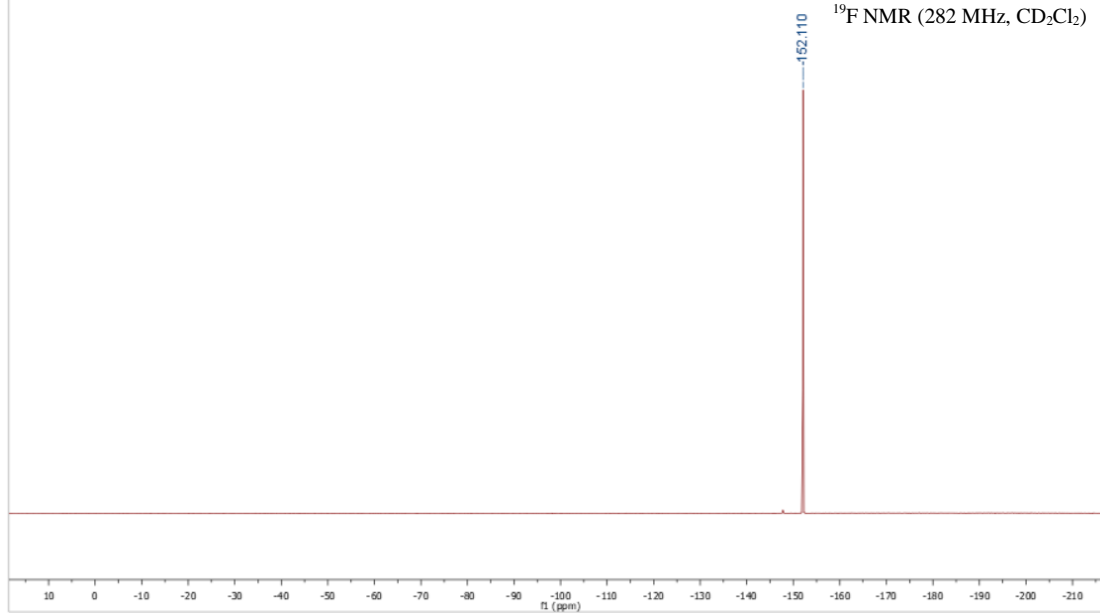

WRH-05-125E

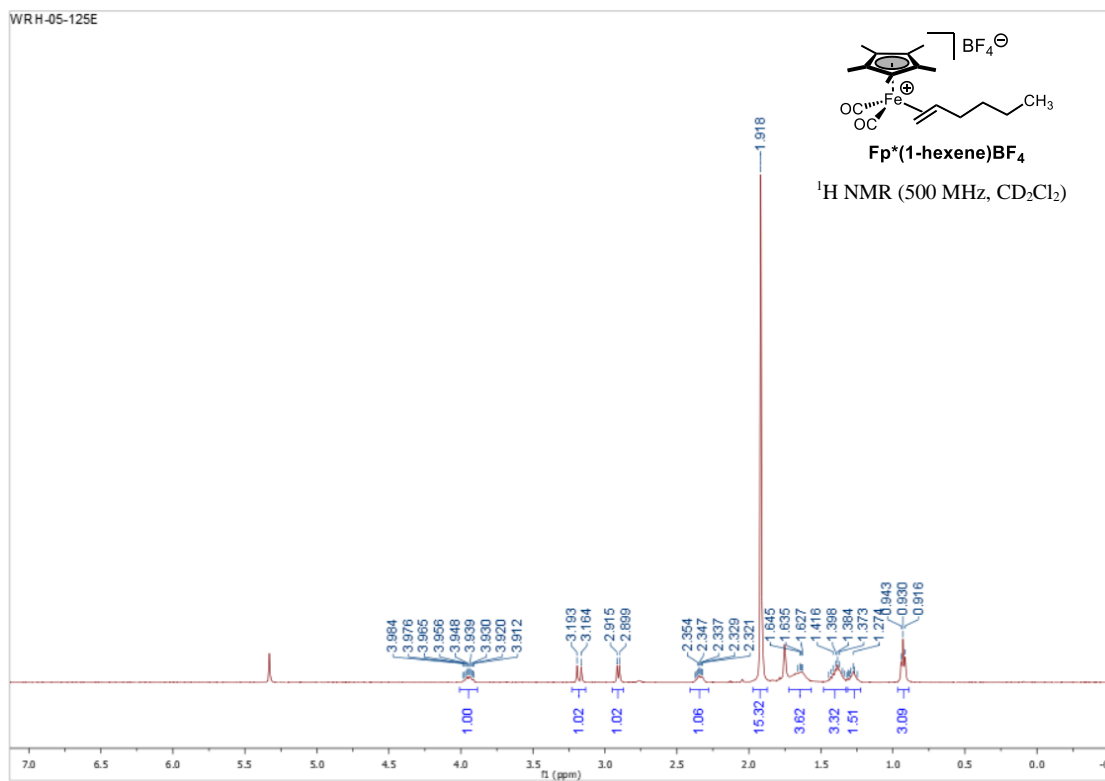

WRH-05-125E-C  
WRH-05-125E-C

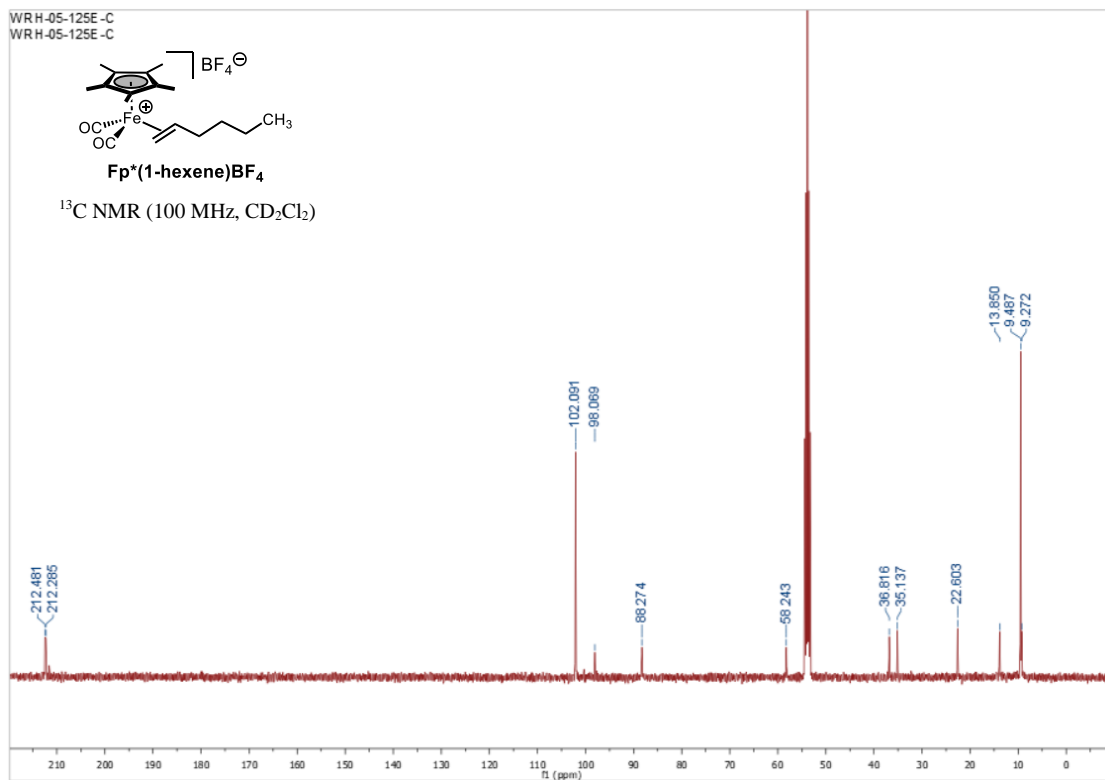

WRH-05-125E-F

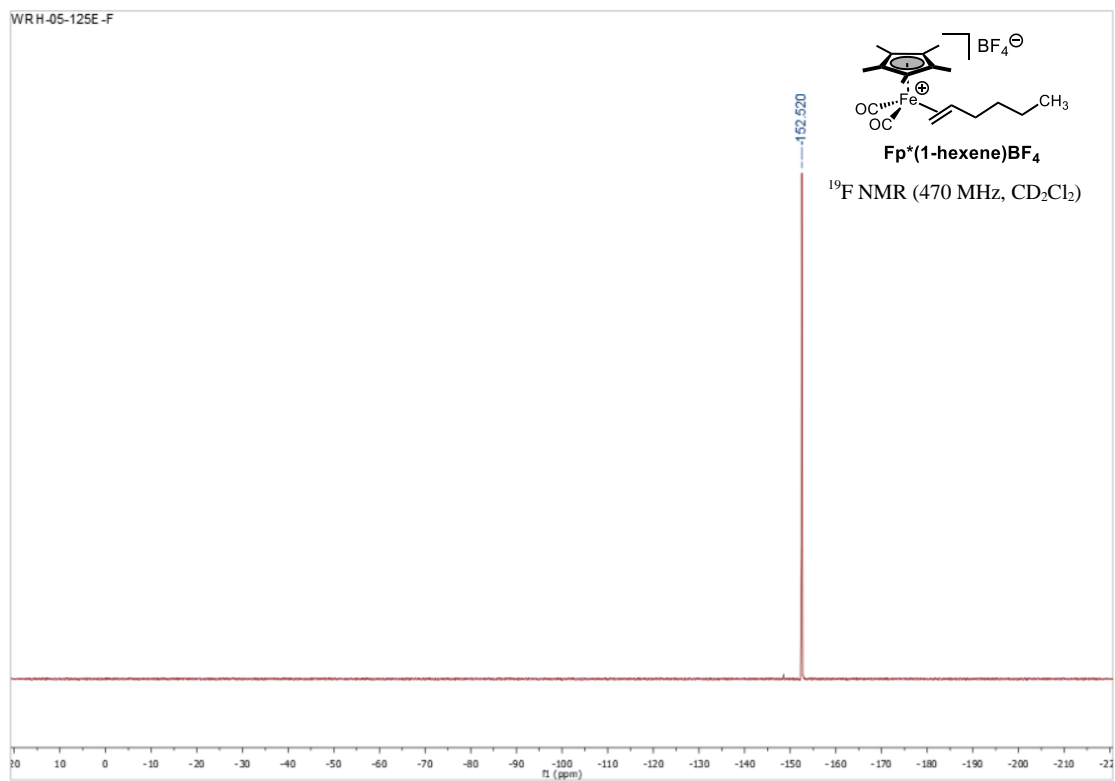



PBS-23-2

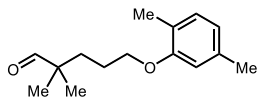

**20**

$^1\text{H NMR}$  (500 MHz,  $\text{CDCl}_3$ )

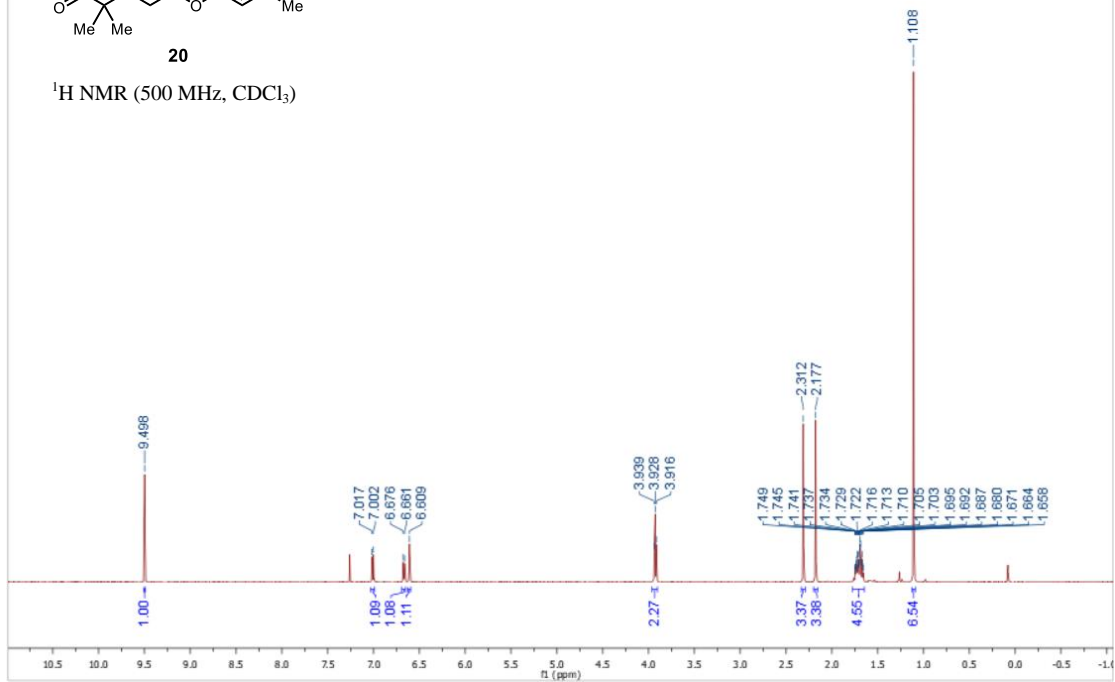

PBS-23-2-C

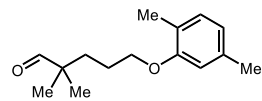

**20**

$^{13}\text{C NMR}$  (125 MHz,  $\text{CDCl}_3$ )

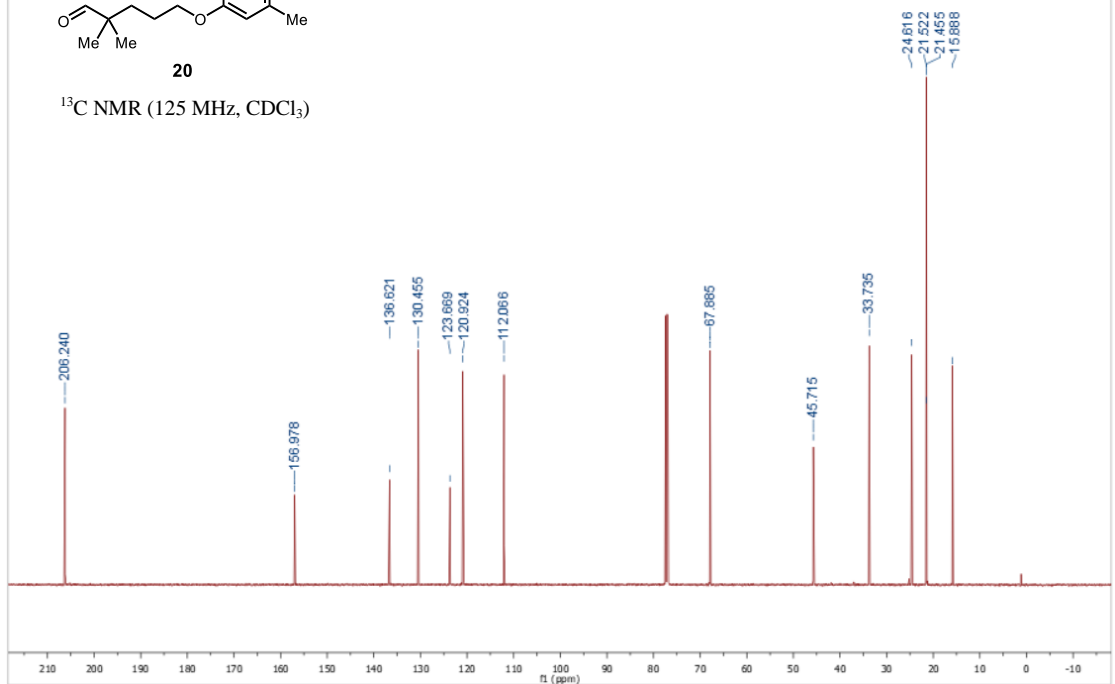

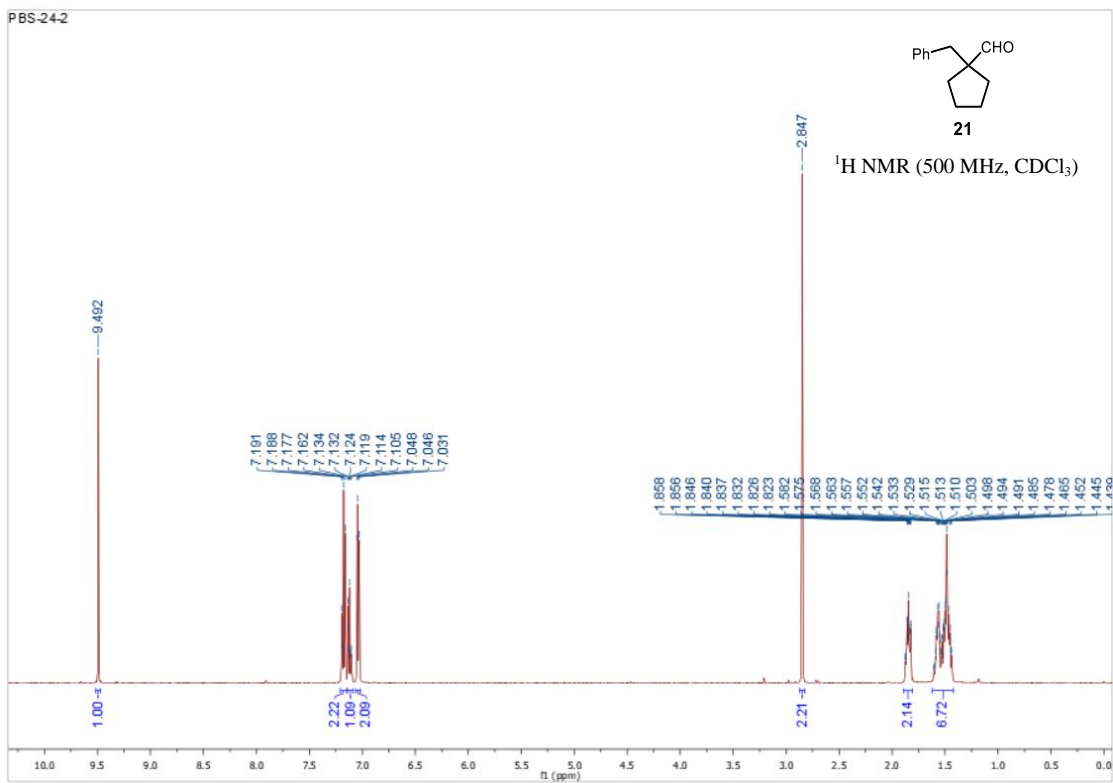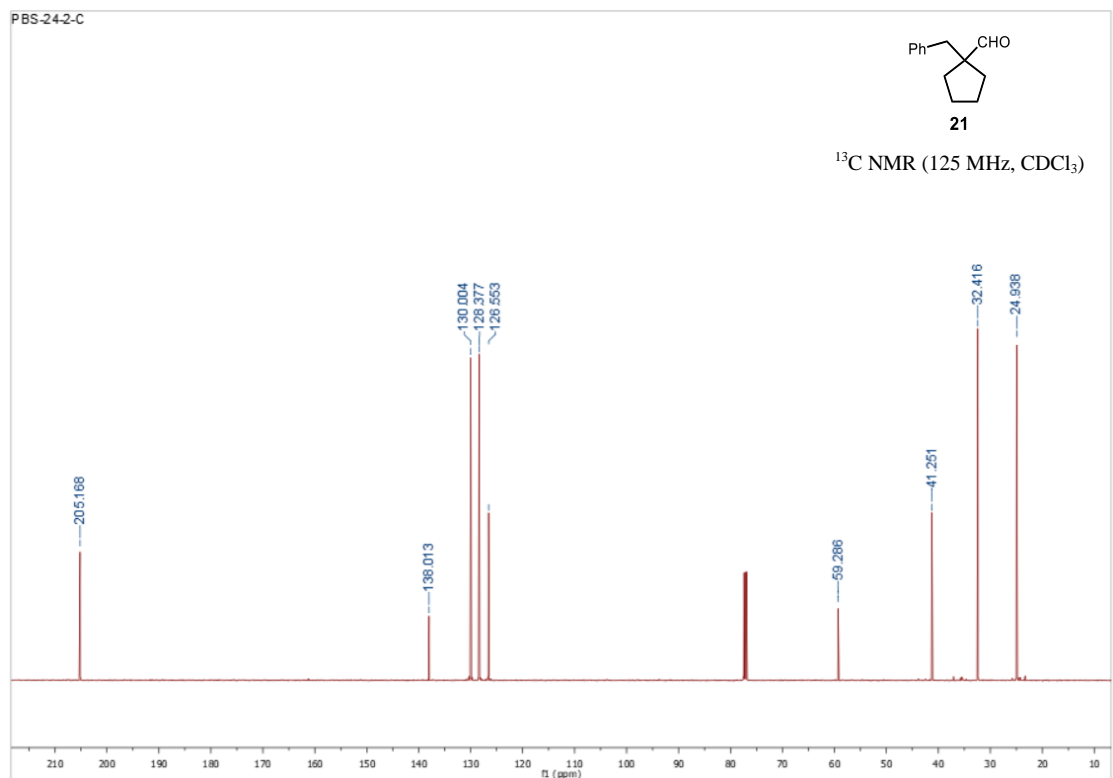

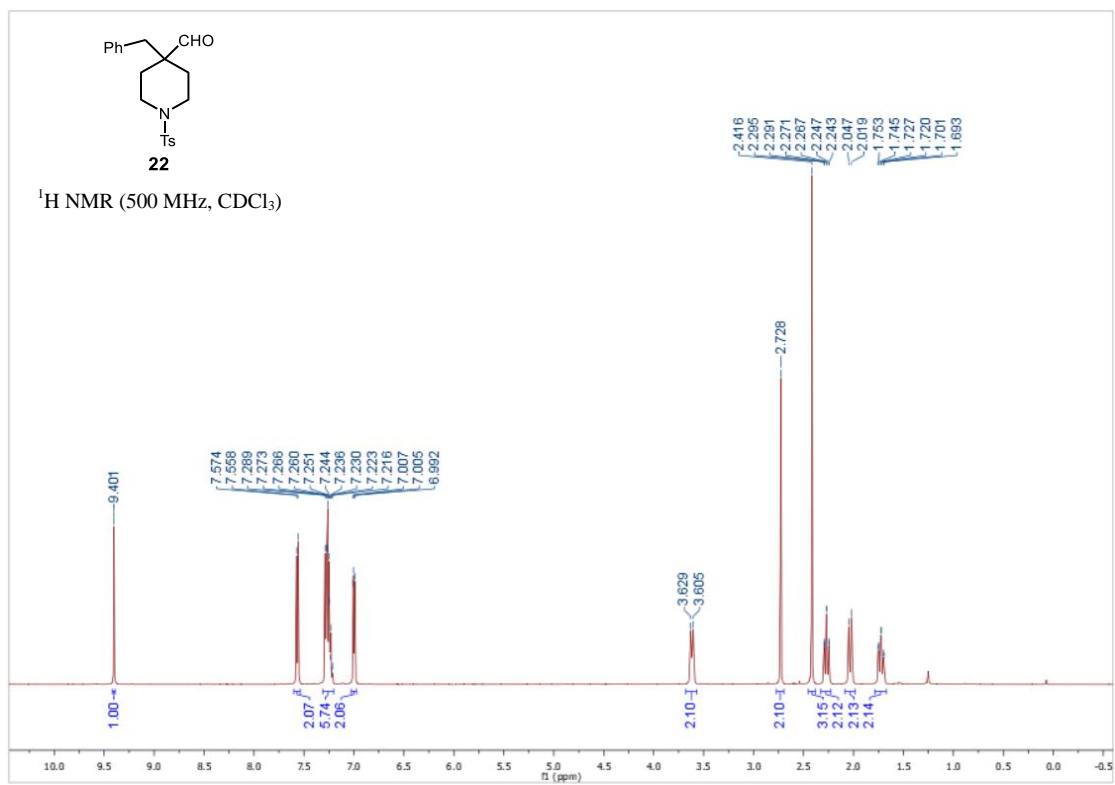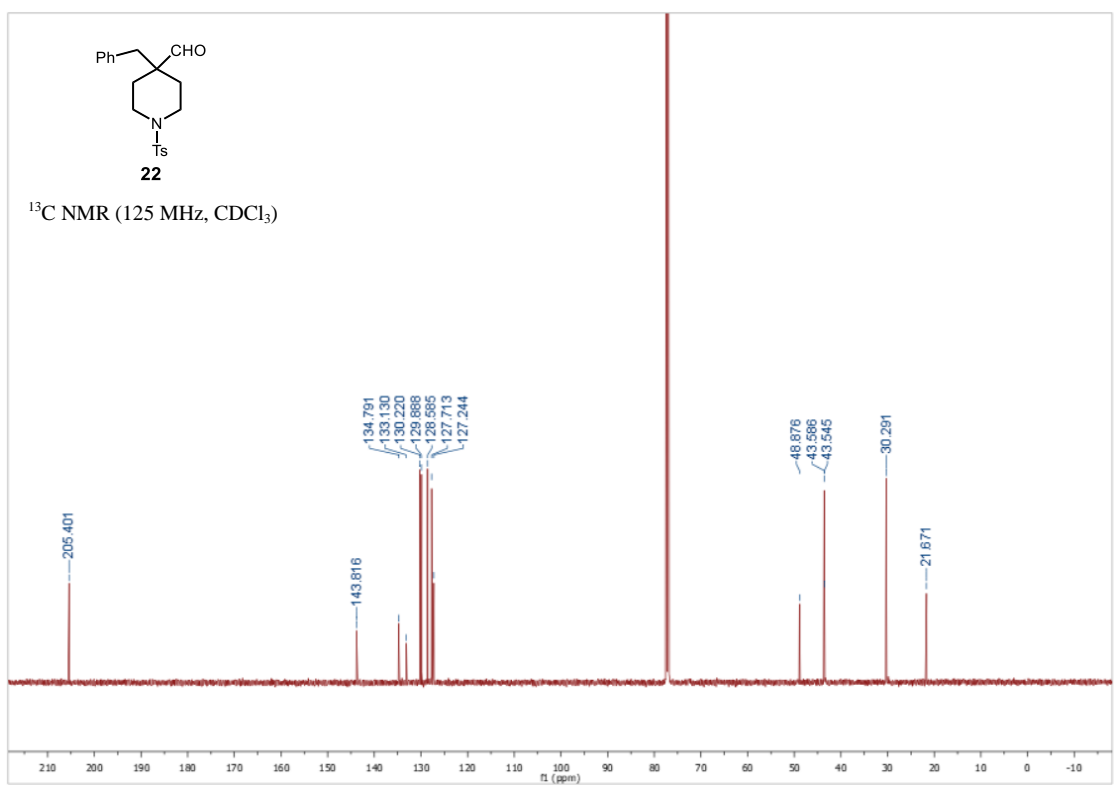

WRH-04-135-2

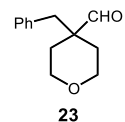

<sup>1</sup>H NMR (400 MHz, CDCl<sub>3</sub>)

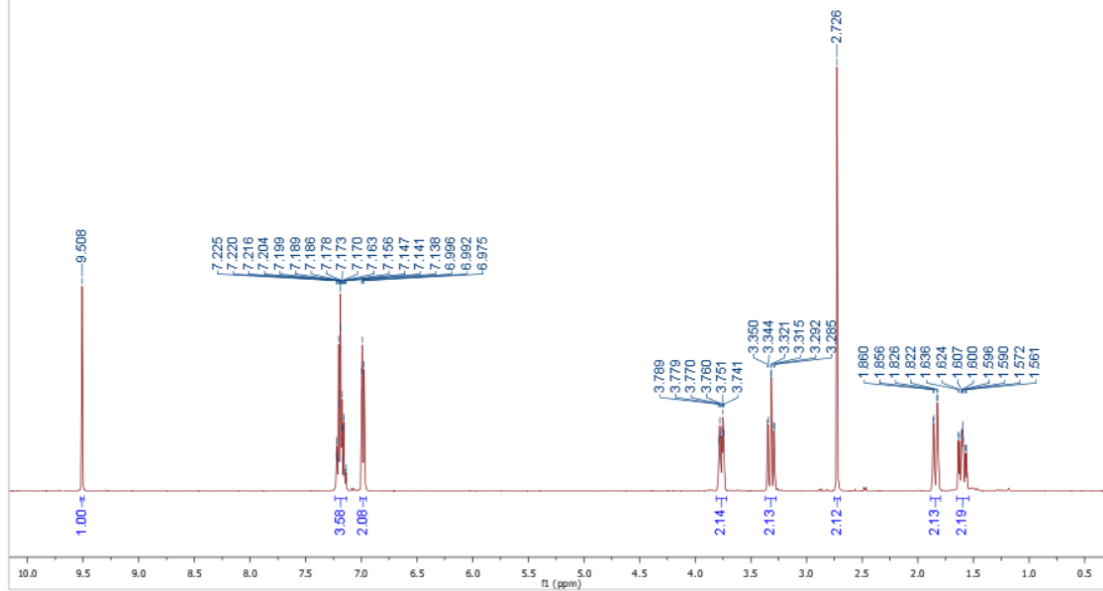

WRH-04-135-2-C

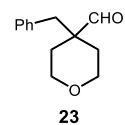

<sup>13</sup>C NMR (100 MHz, CDCl<sub>3</sub>)

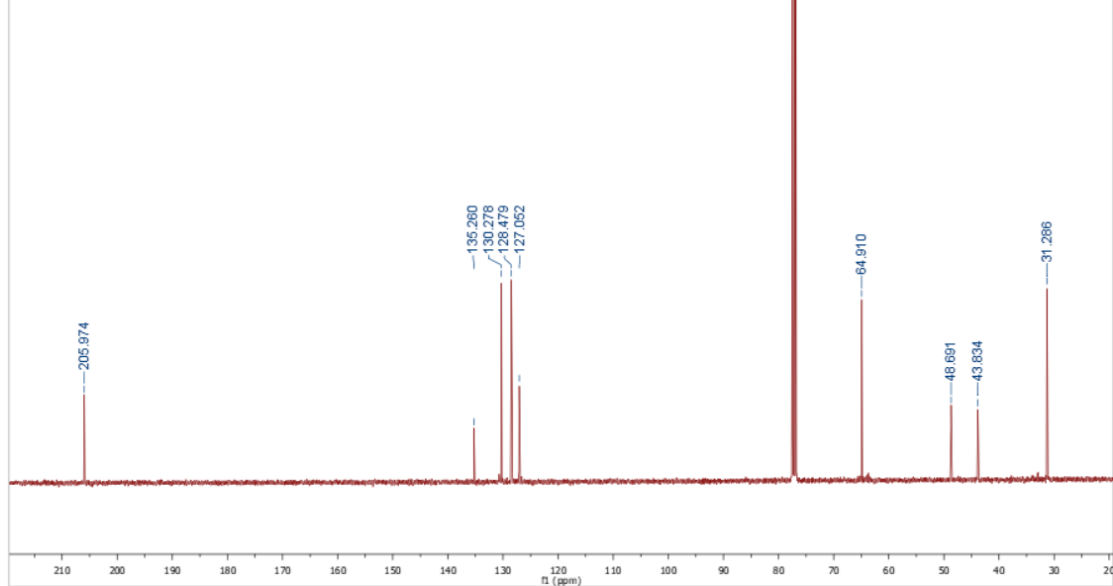

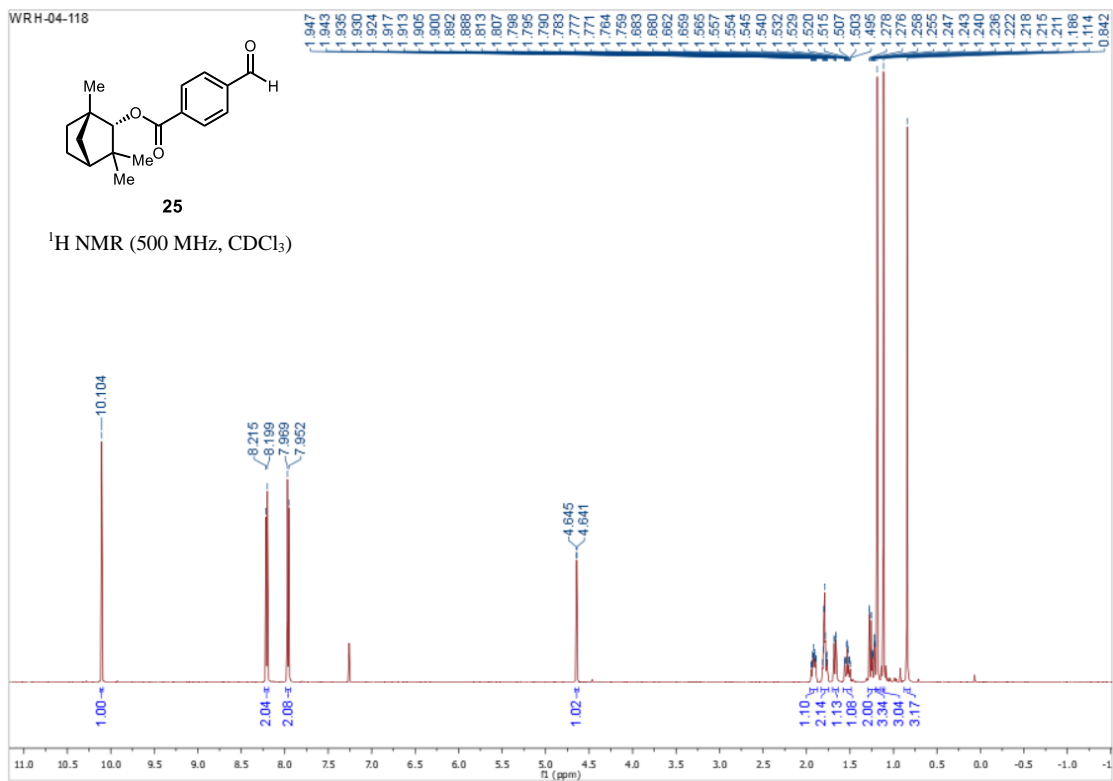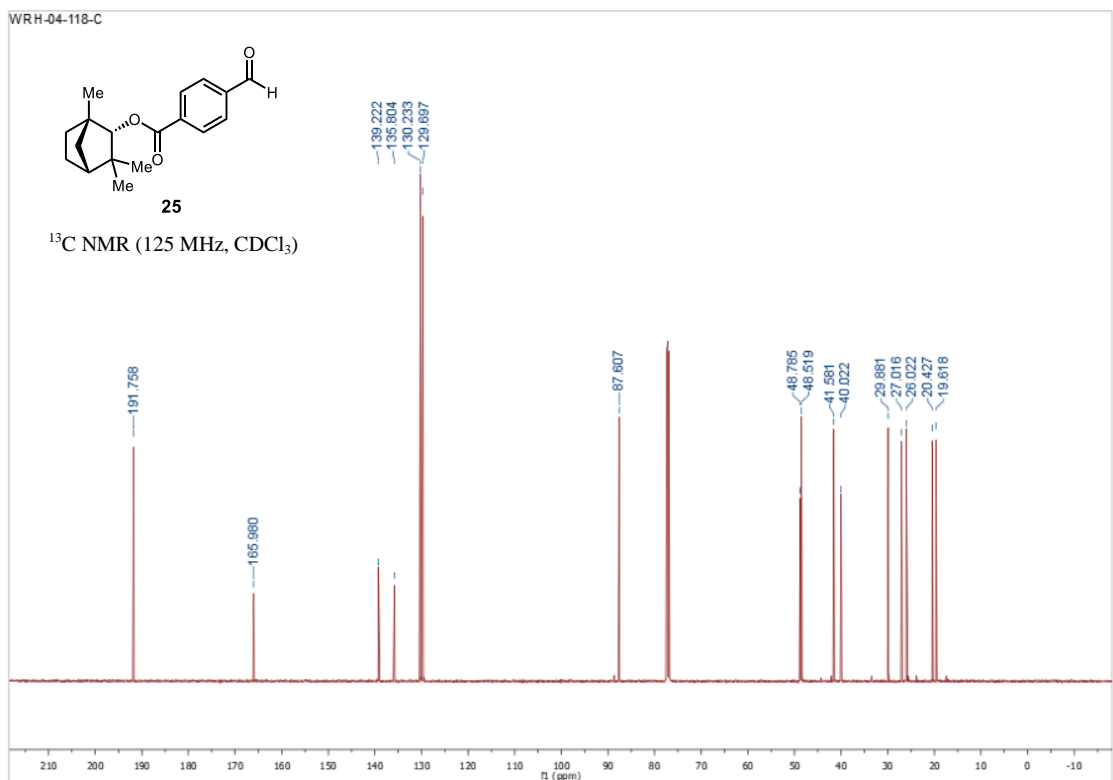

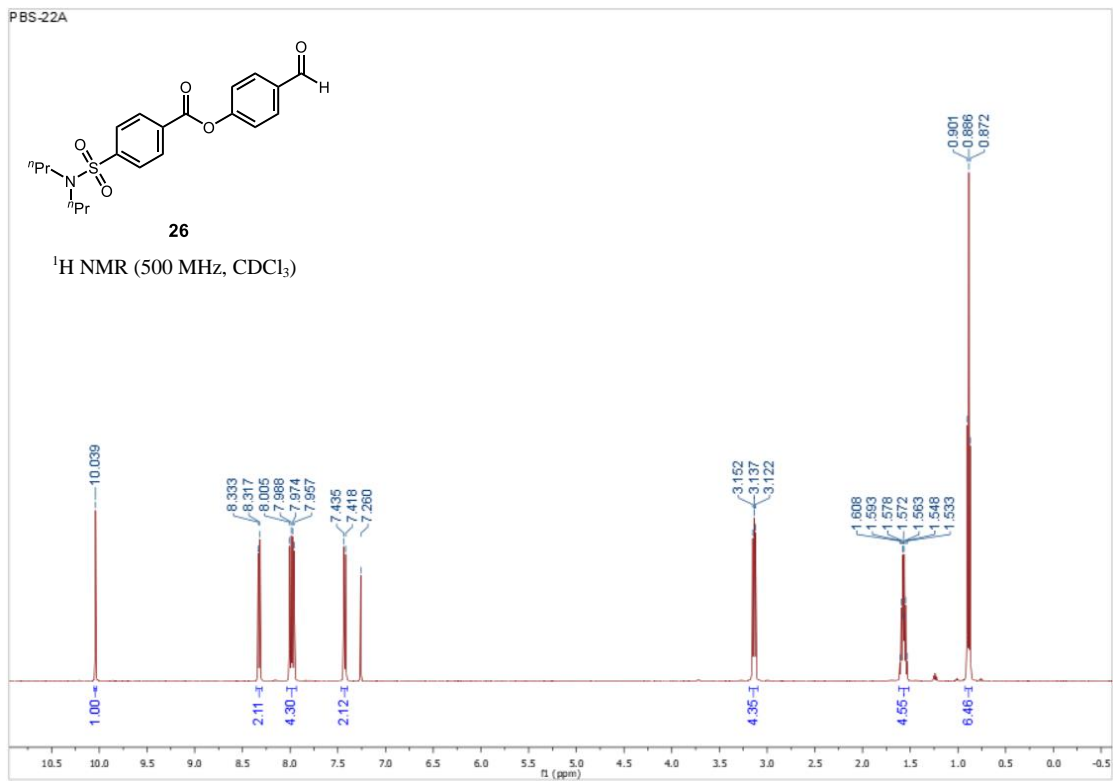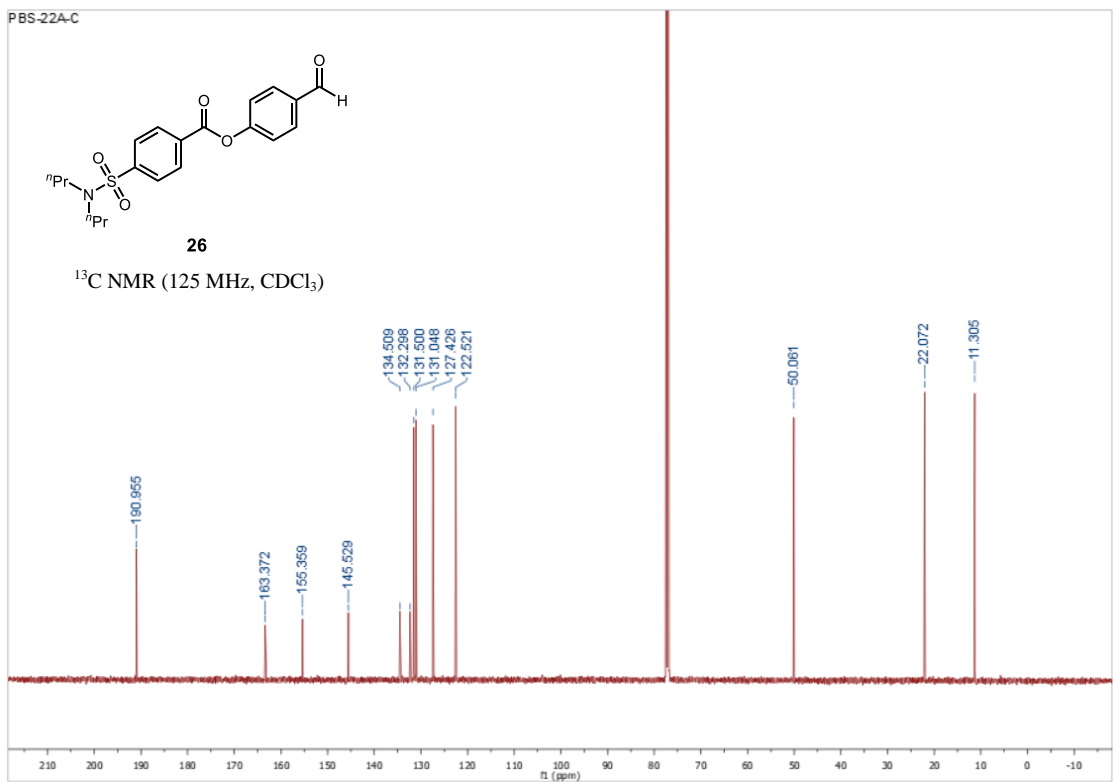

WRH-04-165A

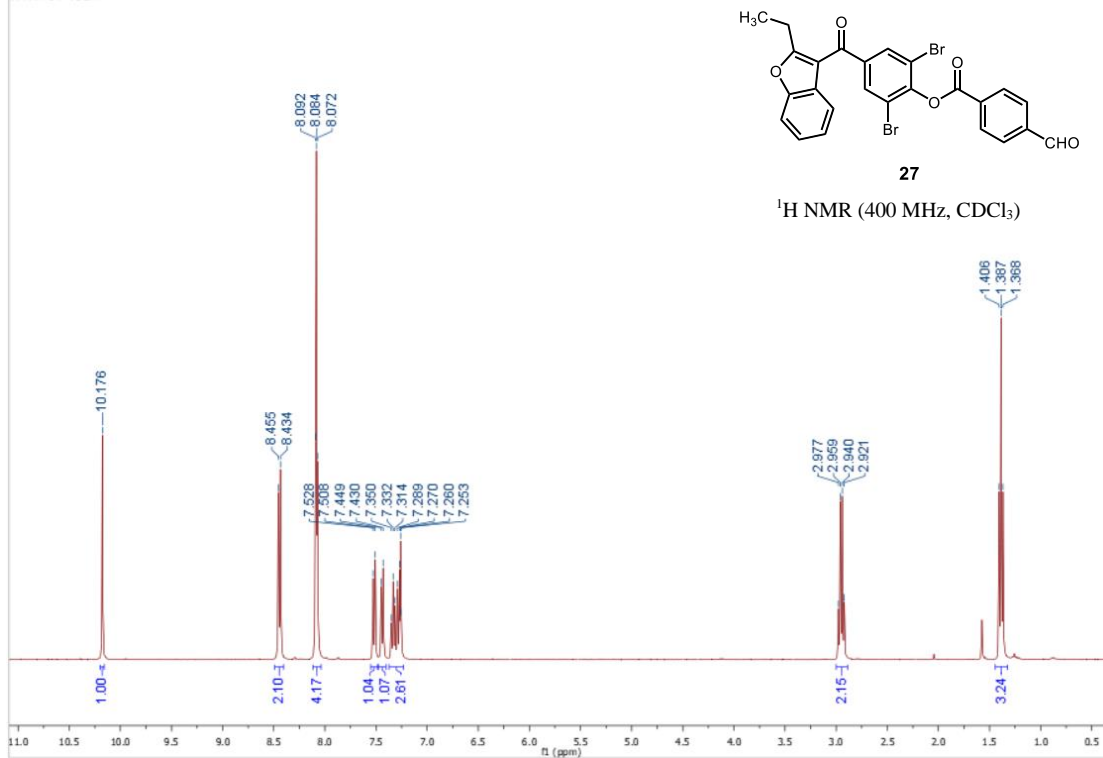

WRH-04-165A-C

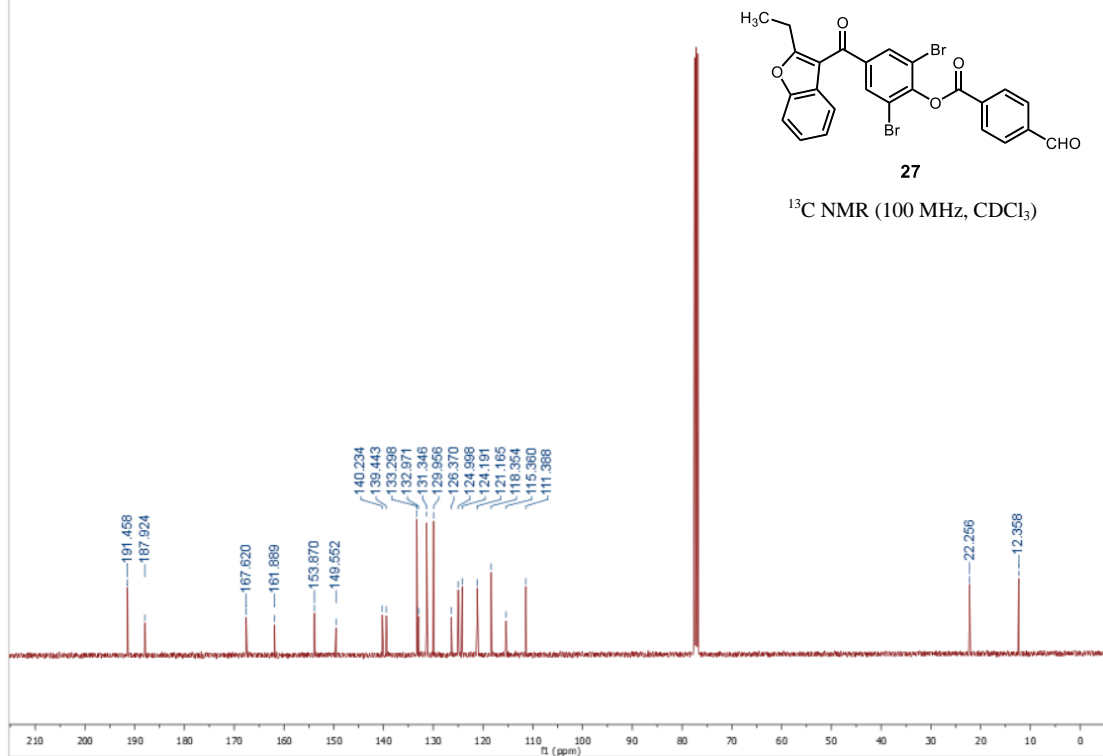

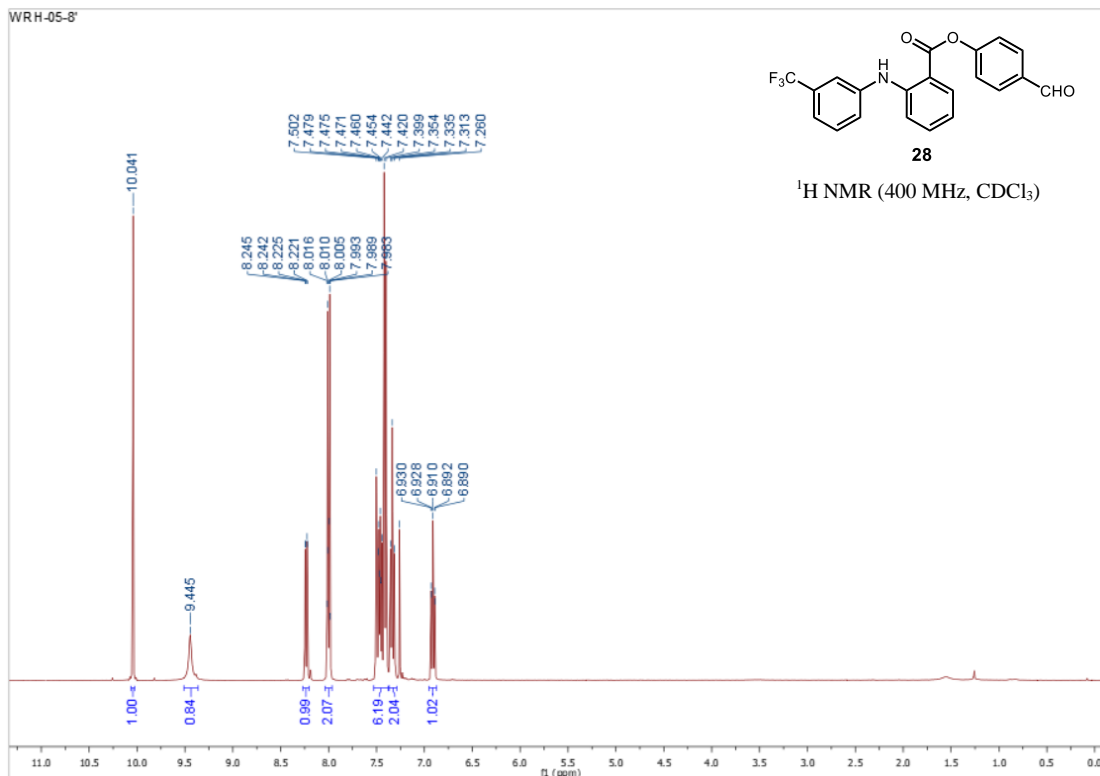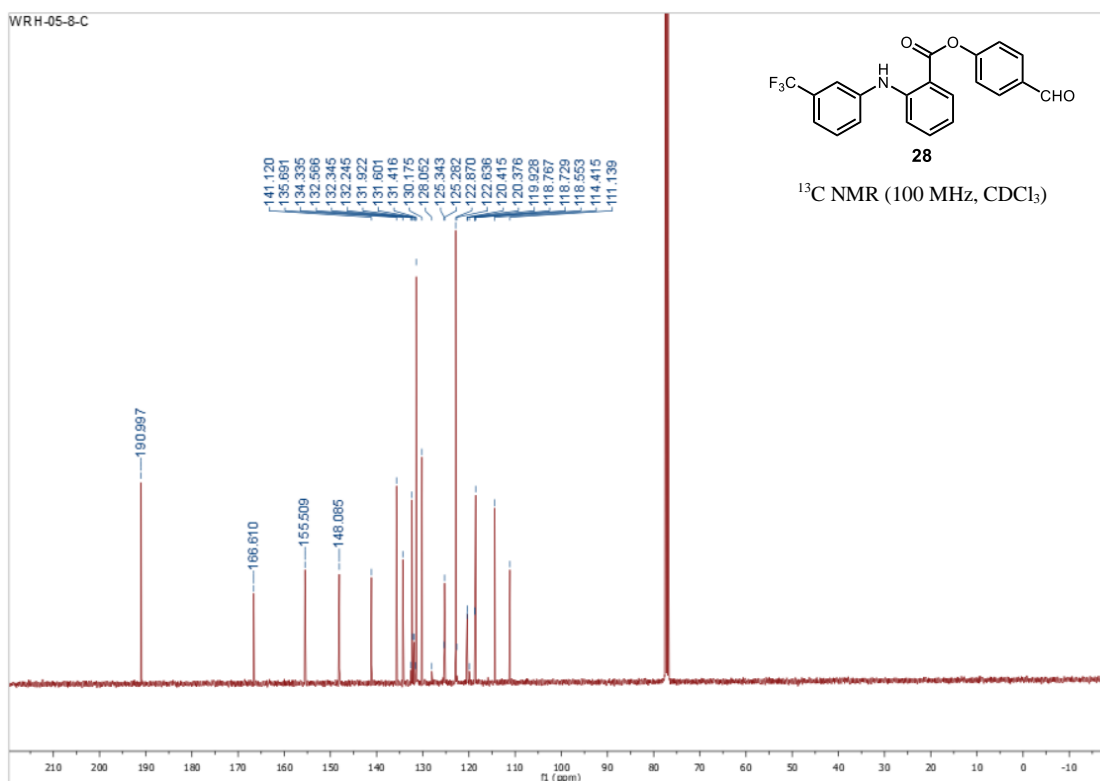



WRH-05-8-F

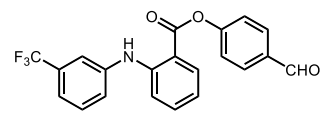

28

$^{19}\text{F}$  NMR (376 MHz,  $\text{CDCl}_3$ )

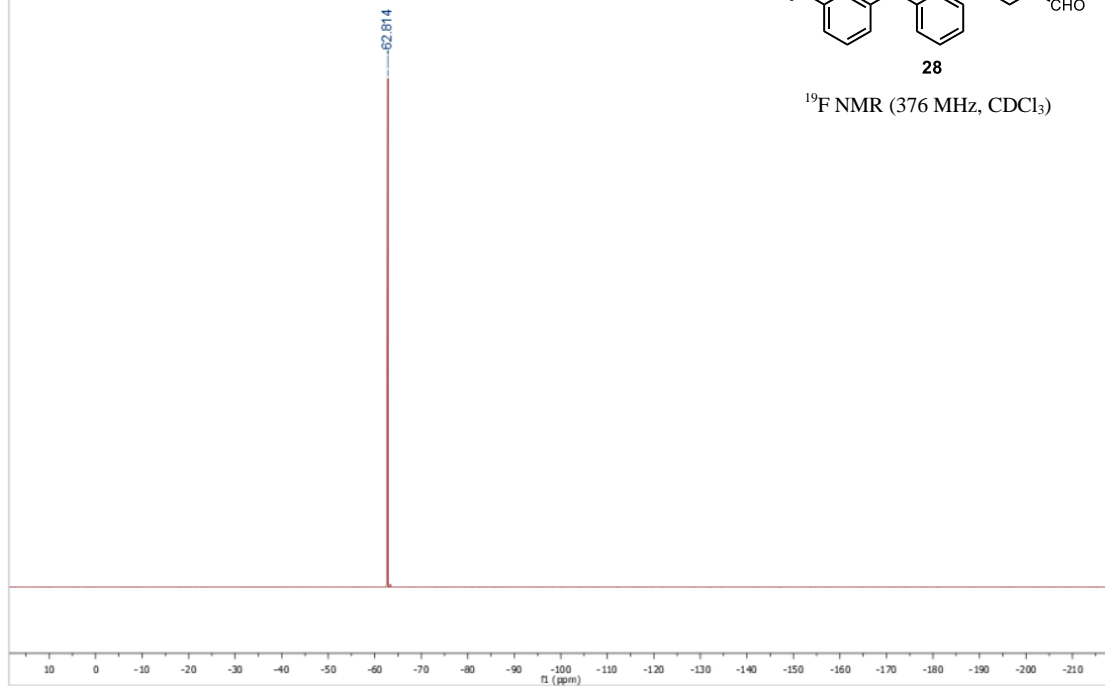

WRH-04-177-2

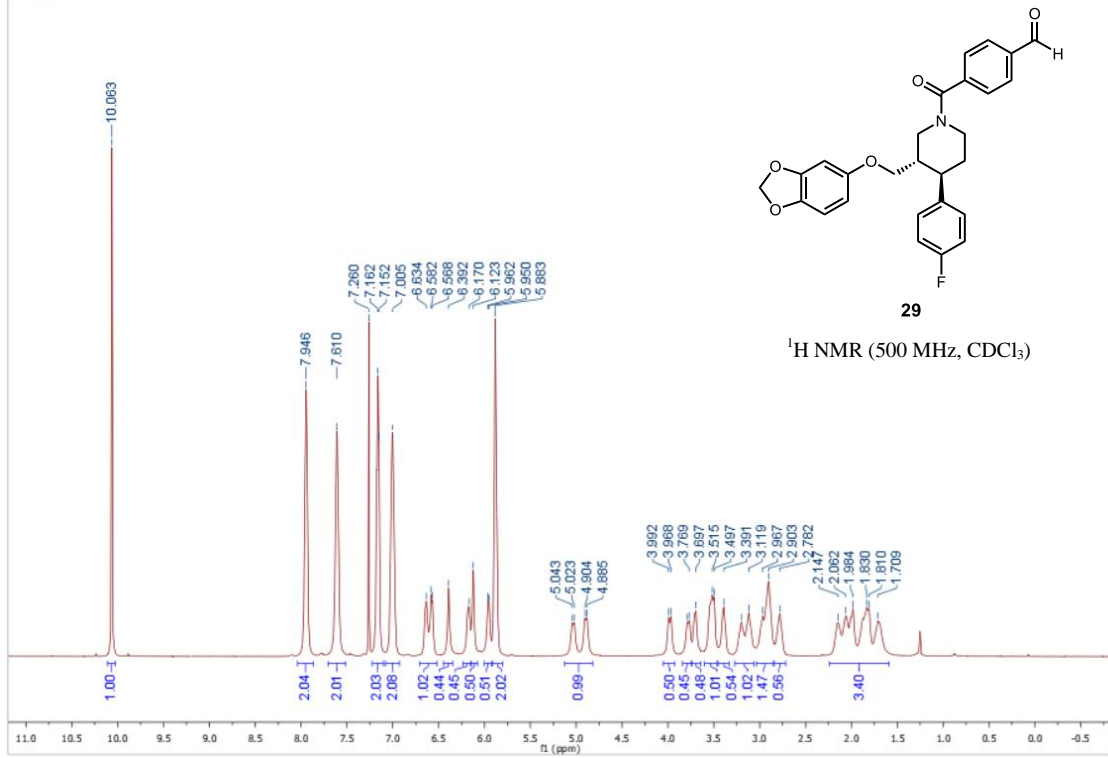

WRH-04-177-C'

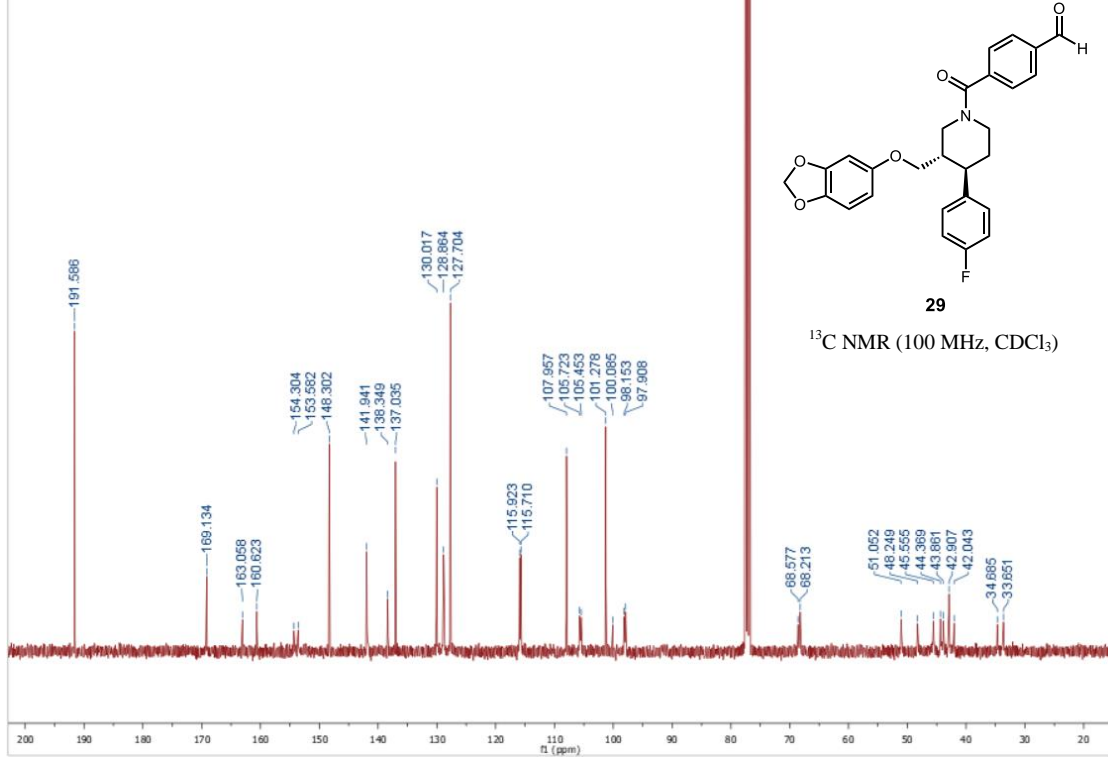

WRH-04-177-2-F

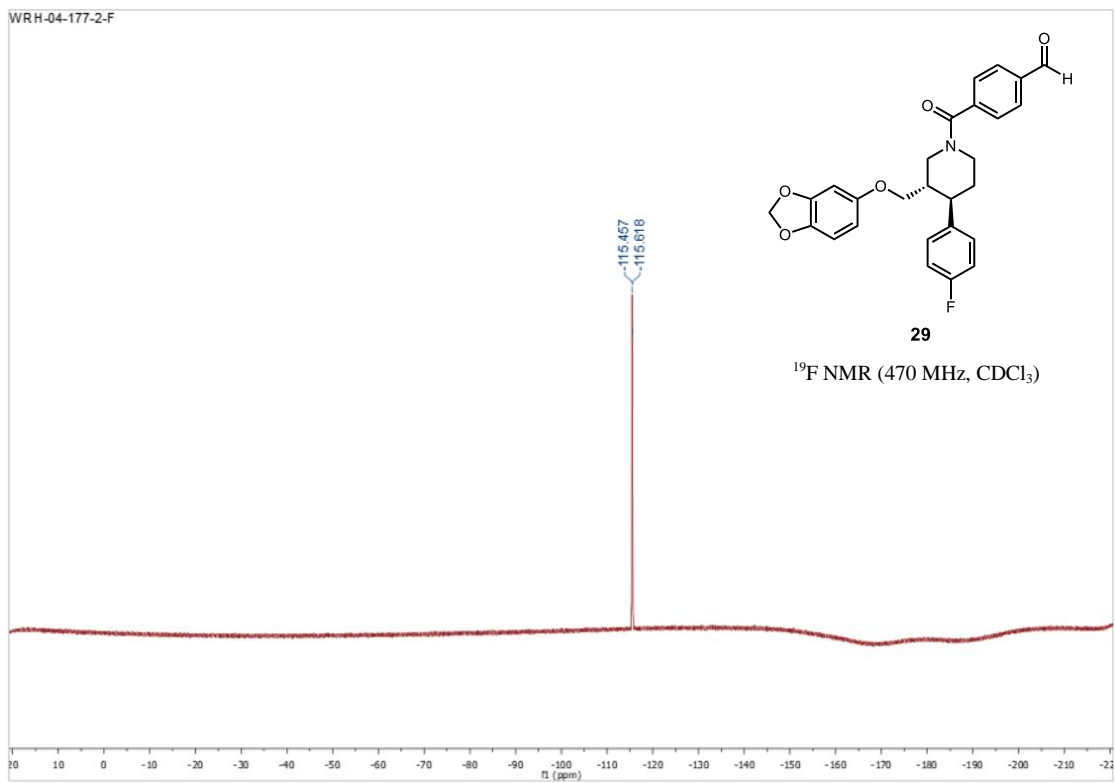

Paul-49 H 500

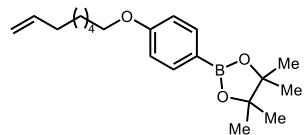

$^1\text{H NMR}$  (500 MHz,  $\text{CDCl}_3$ )

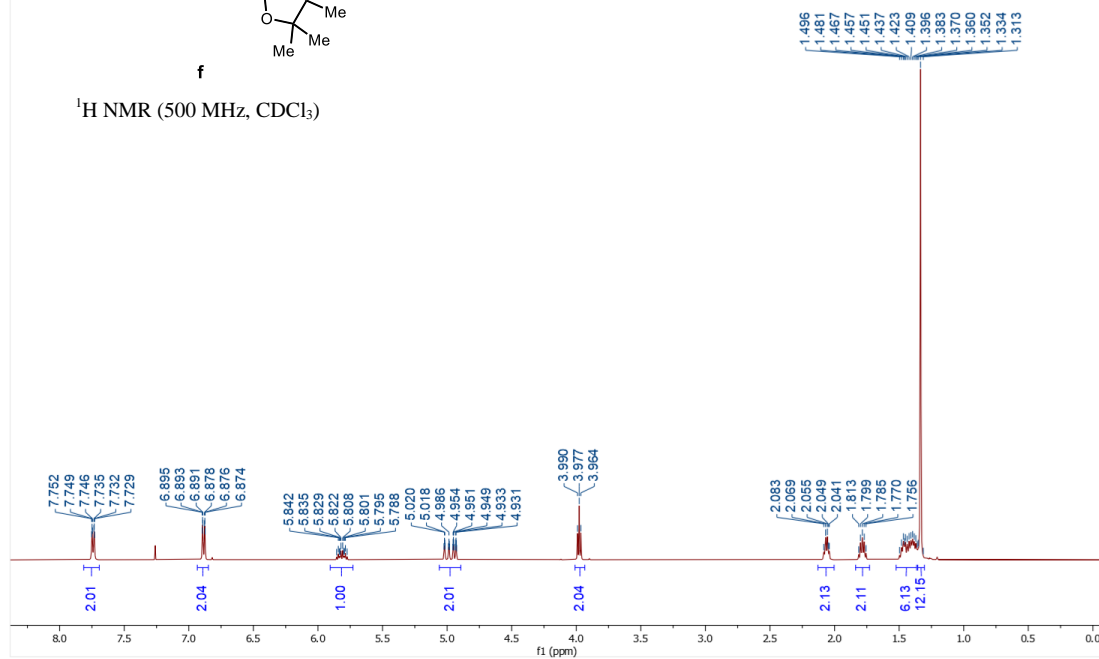

Paul-49 C 500

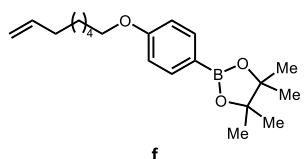

$^{13}\text{C NMR}$  (125 MHz,  $\text{CDCl}_3$ )

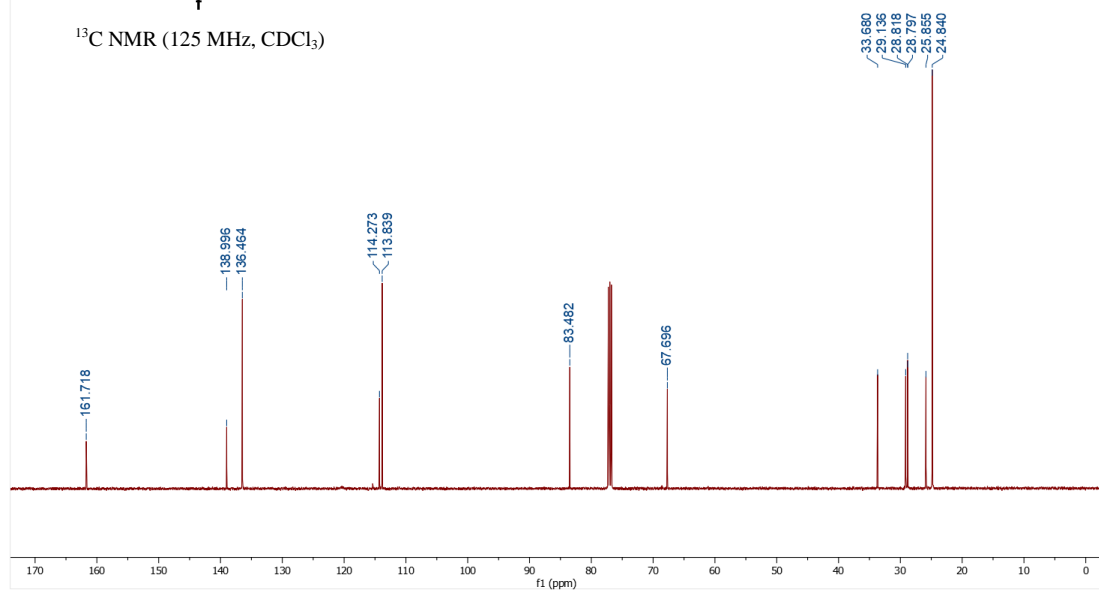

wyd-6-173 H

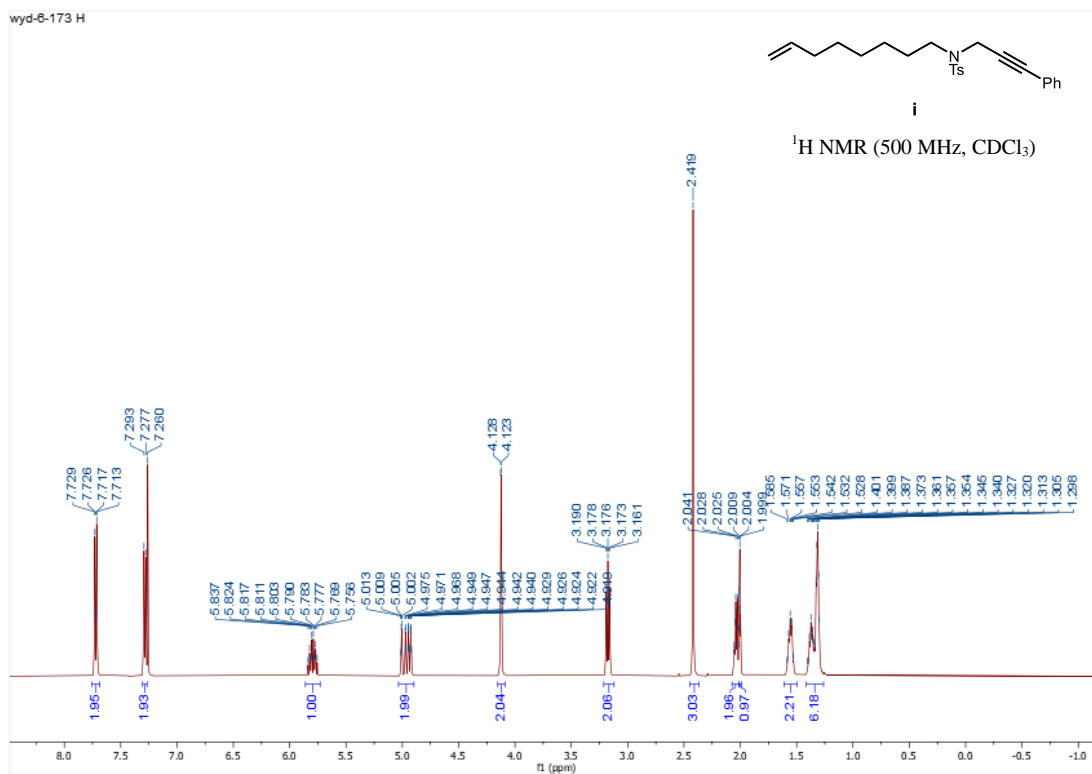

wyd-6-174 C 500

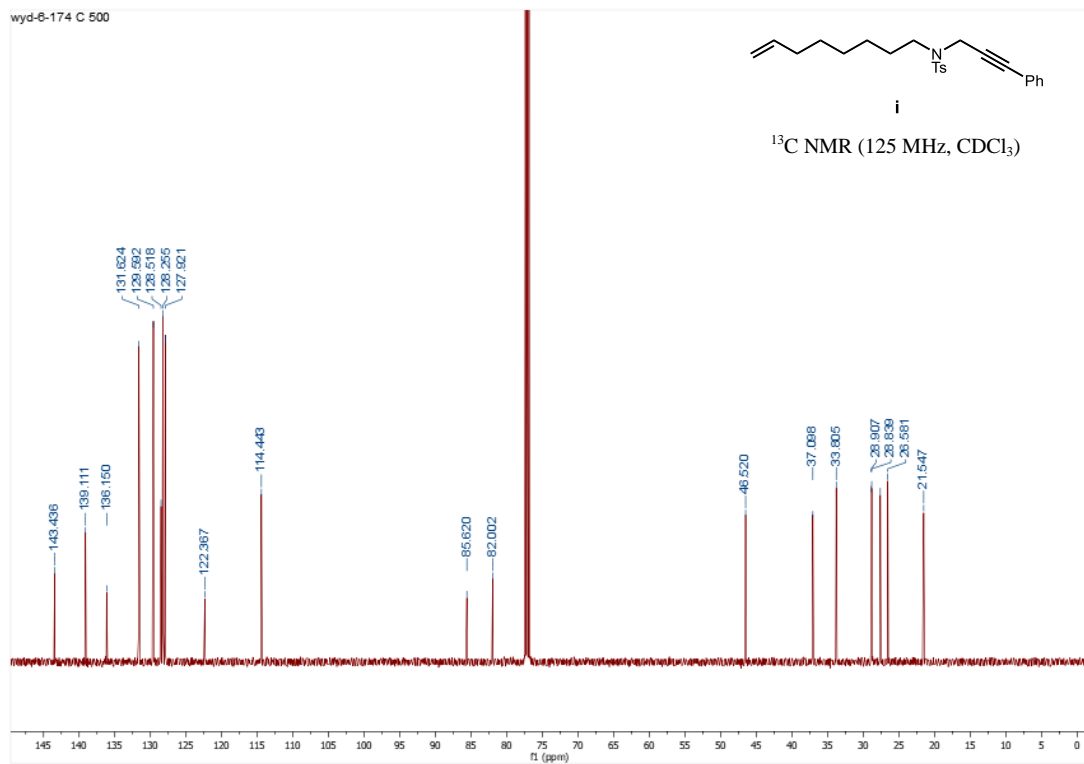

CZZ-83

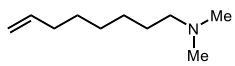

I

$^1\text{H NMR}$  (300 MHz,  $\text{CDCl}_3$ )

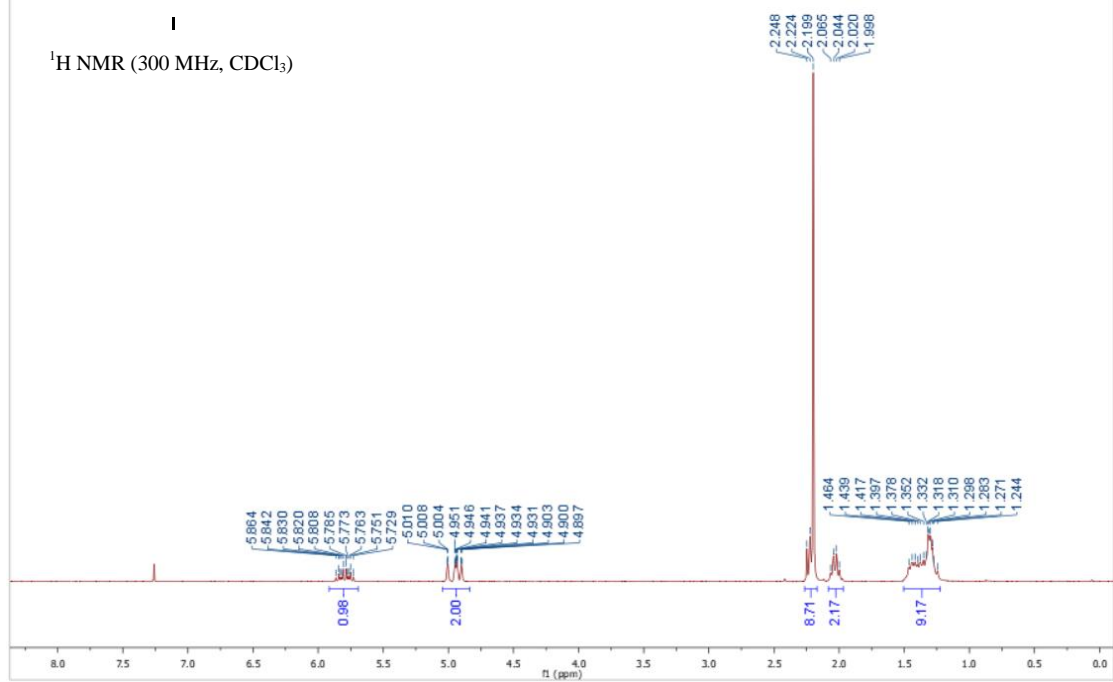

CZZ-83-C

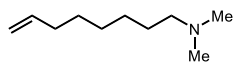

I

$^{13}\text{C NMR}$  (75 MHz,  $\text{CDCl}_3$ )

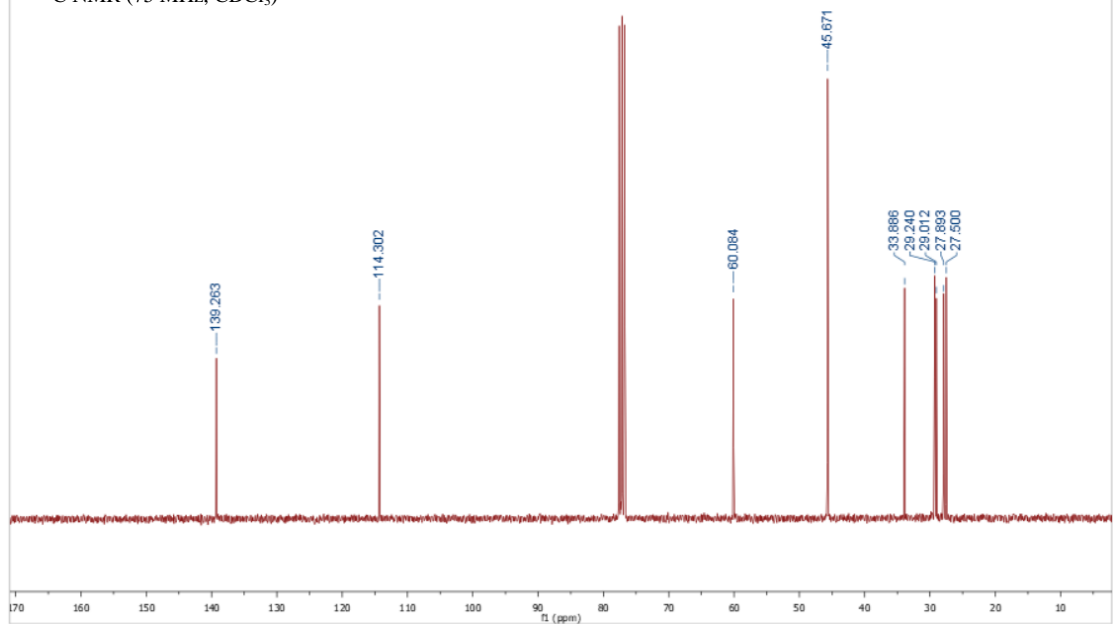

WRH-06-39-2

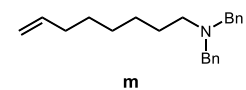

$^1\text{H NMR}$  (500 MHz,  $\text{CDCl}_3$ )

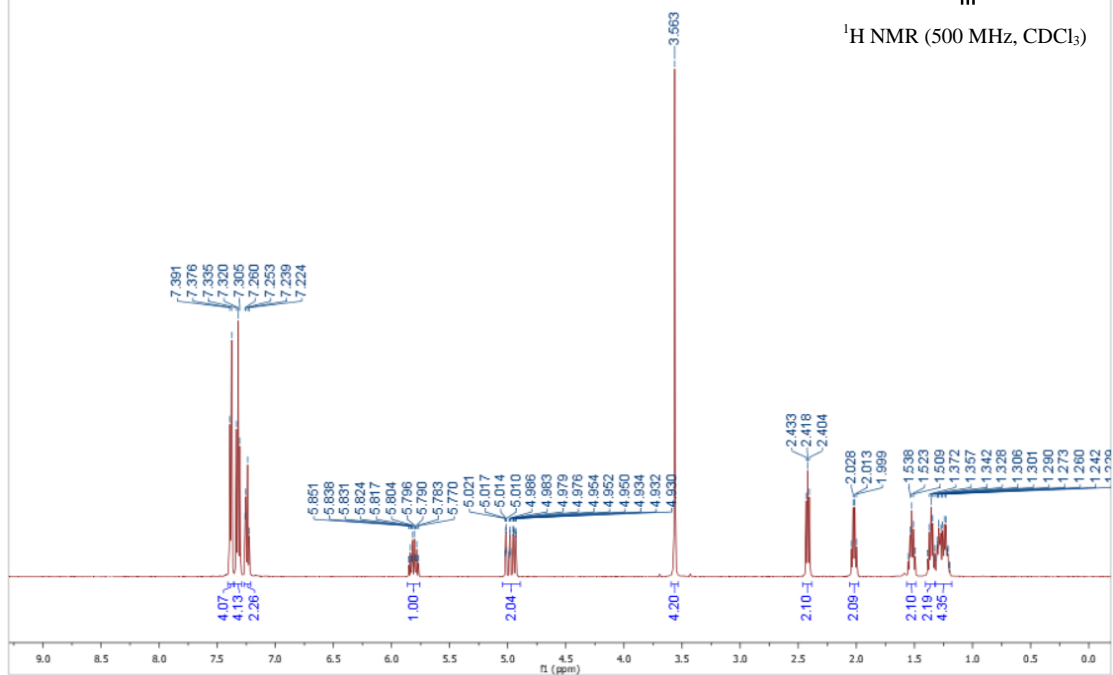

WRH-06-39-2-C

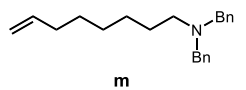

$^{13}\text{C NMR}$  (125 MHz,  $\text{CDCl}_3$ )

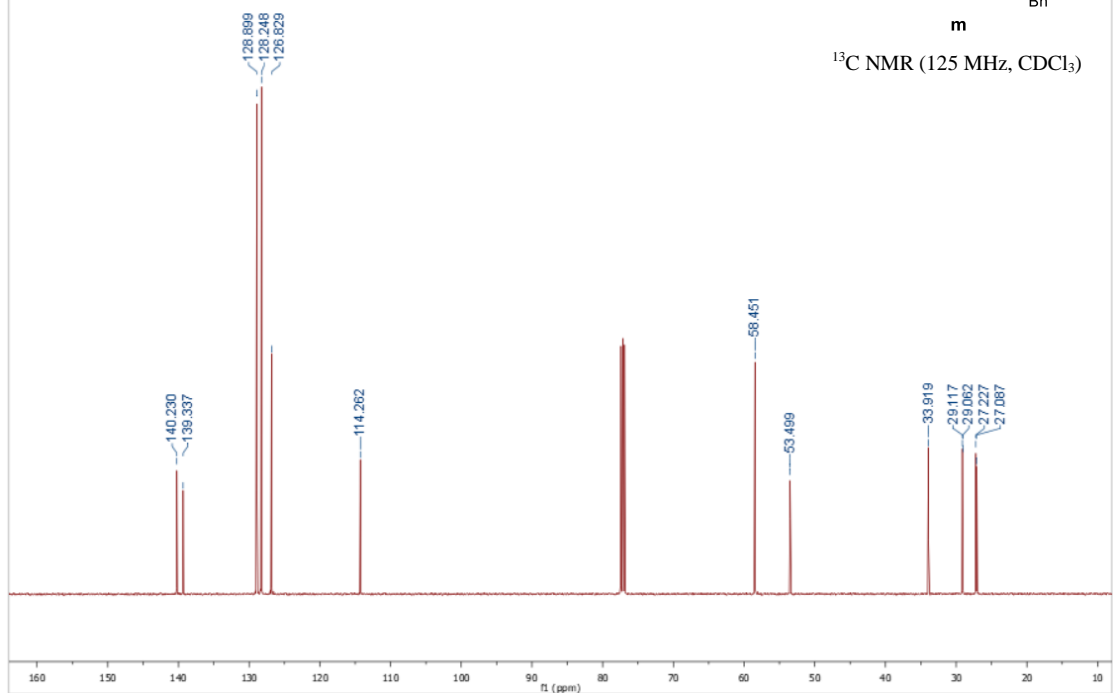

WRH-06-39-1-H

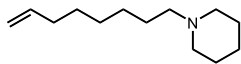

n

<sup>1</sup>H NMR (400 MHz, CDCl<sub>3</sub>)

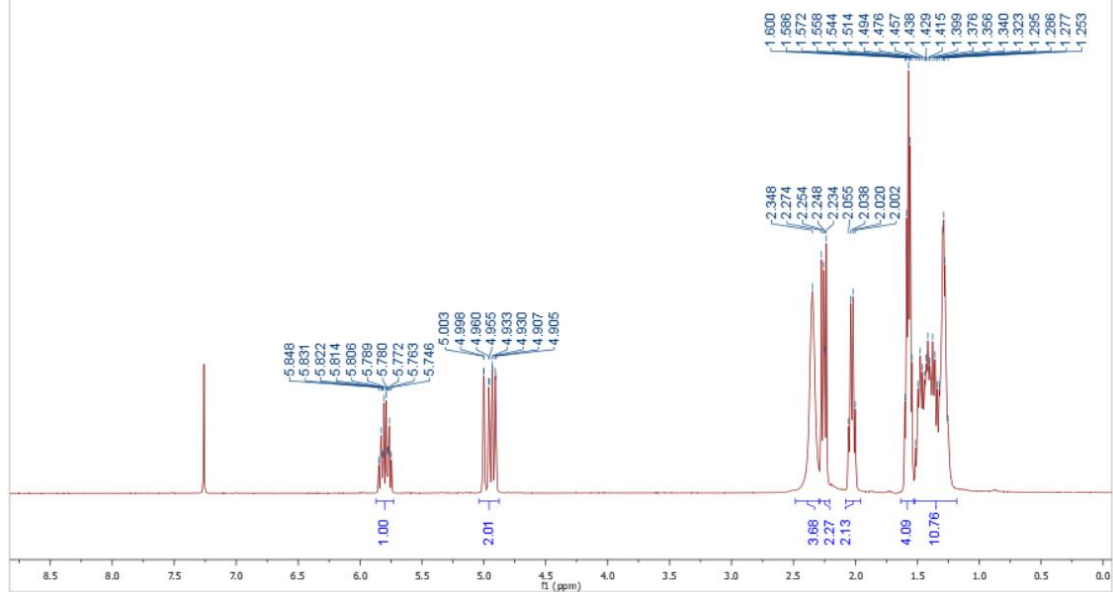

WRH-06-39-1-C

WRH-06-39-1-C

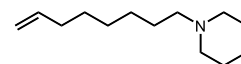

n

<sup>13</sup>C NMR (125 MHz, CDCl<sub>3</sub>)

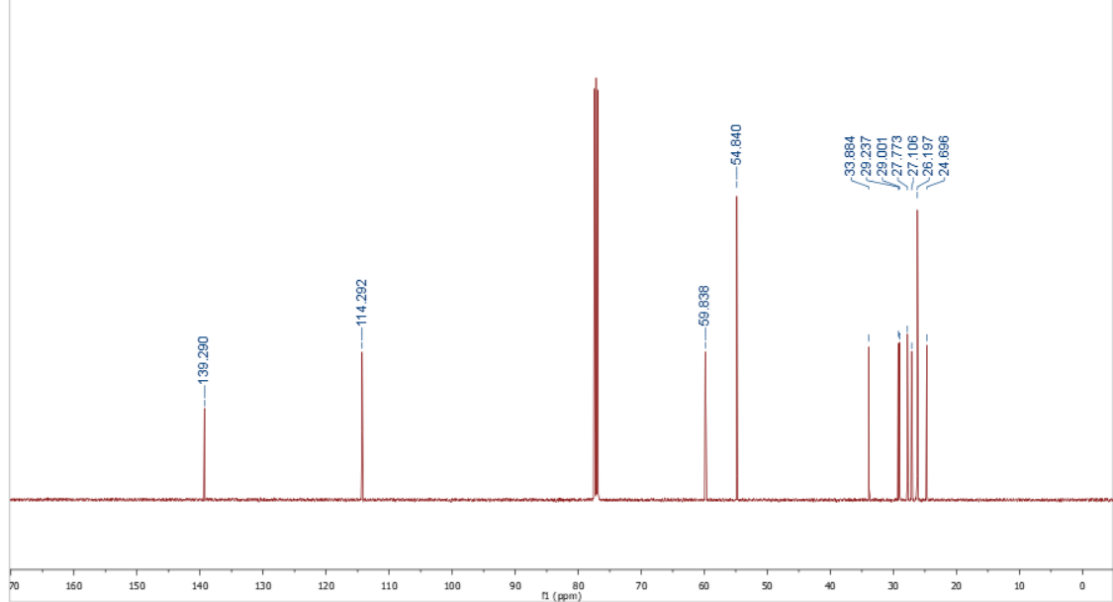



WRH-06-49-H

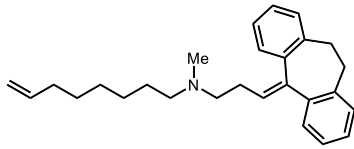

<sup>1</sup>H NMR (400 MHz, CDCl<sub>3</sub>)

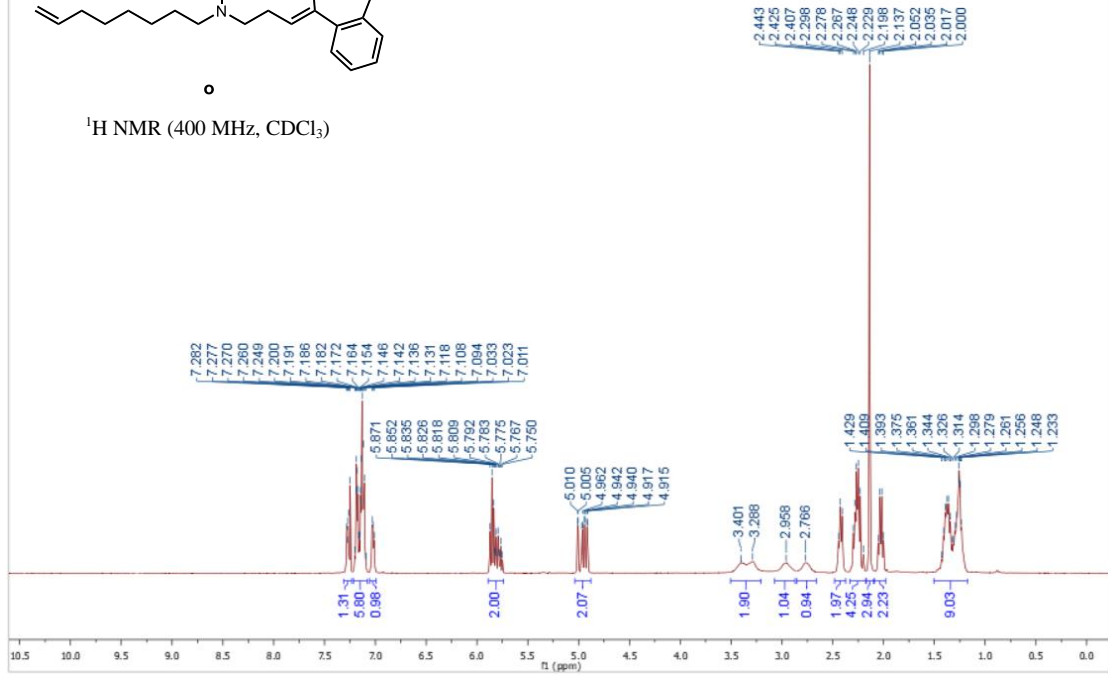

WRH-06-49-C

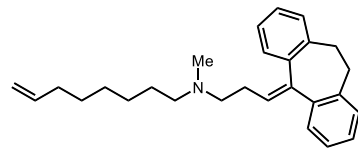

<sup>13</sup>C NMR (100 MHz, CDCl<sub>3</sub>)

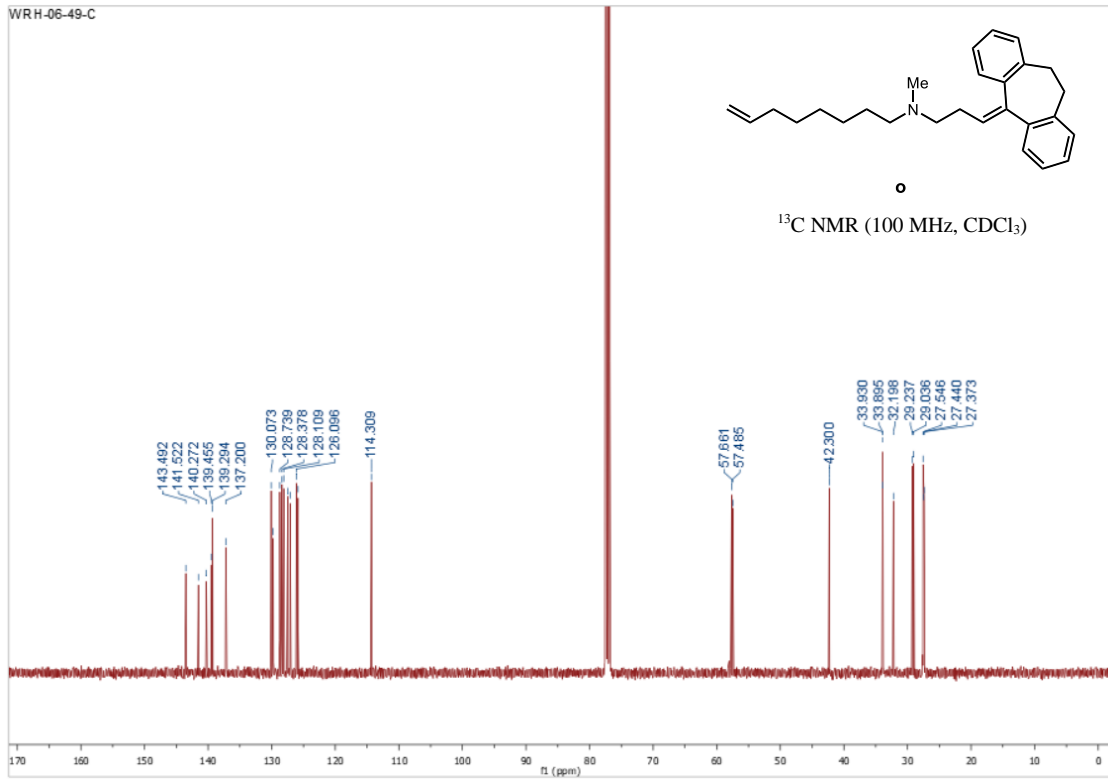

CZZ-63'  
CZZ-63'

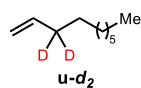

<sup>1</sup>H NMR (400 MHz, CDCl<sub>3</sub>)

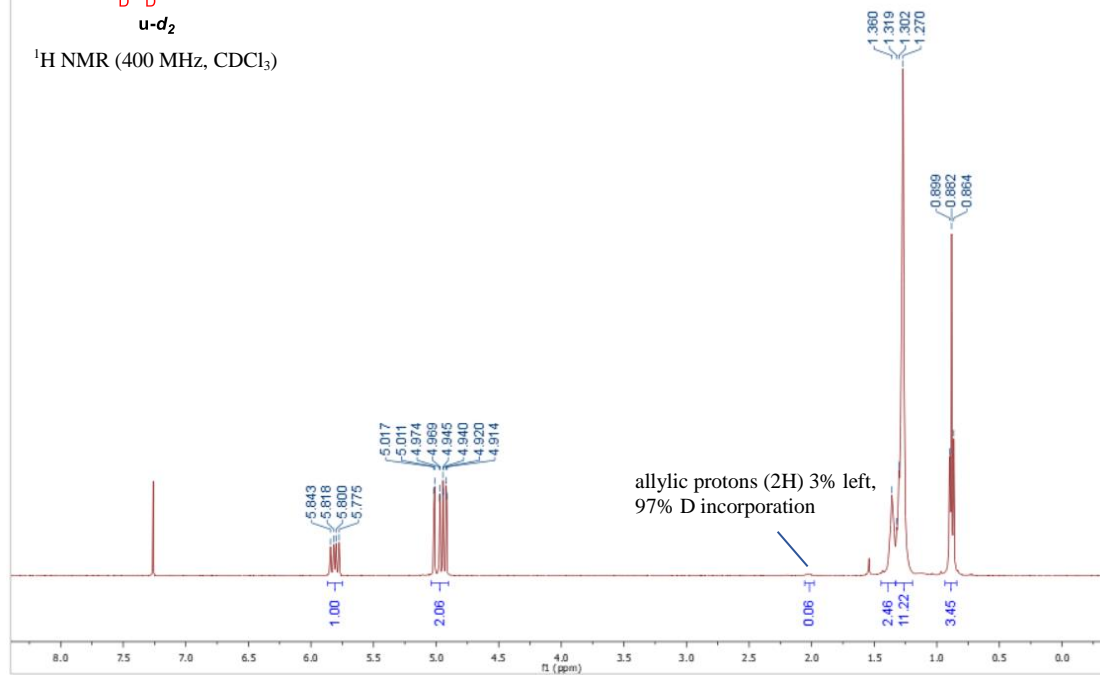

## Cartesian Coordinates (Å) and Energies of the Optimized Structures

### 41

B3LYP-D3 SCF energy (au): -1281.55639934  
B3LYP-D3 enthalpy (au): -1281.04544034  
B3LYP-D3 free energy (au): -1281.13276234  
M06 SCF energy in toluene (au): -1280.95844434  
M06 enthalpy in toluene (au): -1280.44748534  
M06 free energy in toluene (au): -1280.53480734  
M06 free energy in toluene (quasi-harmonic) (au): -1280.53027000  
M06 SCF energy in dichloromethane (au): -1280.979640  
M06 enthalpy in dichloromethane (au): -1279.936526  
M06 free energy in dichloromethane (au): -1280.023848  
M06 free energy in dichloromethane (quasi-harmonic) (au): -1280.019311

### Cartesian coordinates

| ATOMX | Y         | Z         |           |
|-------|-----------|-----------|-----------|
| C     | 1.808771  | -0.410711 | -0.686447 |
| C     | 1.772026  | -0.918588 | 0.649273  |
| C     | 3.363861  | -2.795341 | -1.462429 |
| C     | 2.958015  | -1.298980 | 1.487669  |
| C     | 4.262587  | -2.820549 | -0.202390 |
| C     | 3.536848  | -2.690446 | 1.148145  |
| H     | 3.746704  | -0.545175 | 1.377961  |
| H     | 3.668218  | -3.602094 | -2.137766 |
| H     | 5.040595  | -2.047530 | -0.274967 |
| H     | 2.328667  | -3.029668 | -1.179058 |
| H     | 2.662107  | -1.287880 | 2.542674  |
| H     | 4.801672  | -3.773586 | -0.178390 |
| H     | 4.244328  | -2.941070 | 1.946989  |
| H     | 2.733627  | -3.437487 | 1.202910  |
| C     | 3.051212  | -0.209072 | -1.494750 |
| H     | 3.881407  | 0.051191  | -0.830597 |
| H     | 2.928204  | 0.623503  | -2.195359 |
| C     | 3.393344  | -1.495384 | -2.281951 |
| H     | 2.692955  | -1.592475 | -3.120654 |
| H     | 4.388738  | -1.358156 | -2.720515 |
| C     | 0.386849  | -1.131534 | 0.984140  |
| C     | 0.463055  | -0.257033 | -1.129076 |
| C     | -0.430877 | -0.769673 | -0.119833 |
| C     | -1.885188 | -0.847249 | -0.204522 |
| C     | -2.541071 | -0.732064 | -1.448598 |
| C     | -2.675073 | -1.044784 | 0.940424  |
| C     | -3.918792 | -0.806155 | -1.540014 |
| H     | -1.961451 | -0.609858 | -2.358388 |
| C     | -4.060909 | -1.118141 | 0.864860  |
| H     | -2.204373 | -1.136593 | 1.914954  |
| C     | -4.696953 | -0.997903 | -0.382901 |
| H     | -4.425876 | -0.730557 | -2.495591 |
| H     | -4.636124 | -1.269185 | 1.769722  |

|    |           |           |           |
|----|-----------|-----------|-----------|
| H  | 0.176041  | 0.117800  | -2.101056 |
| H  | 0.039178  | -1.545079 | 1.921403  |
| O  | -6.026452 | -1.054441 | -0.574682 |
| C  | -6.879079 | -1.271068 | 0.550005  |
| H  | -6.784530 | -0.456901 | 1.277880  |
| H  | -7.892595 | -1.288447 | 0.150534  |
| H  | -6.656864 | -2.229707 | 1.032442  |
| Fe | 0.772362  | 0.936769  | 0.607356  |
| C  | 1.963901  | 2.187454  | 0.141507  |
| C  | 1.026300  | 1.183984  | 2.359399  |
| O  | 1.198132  | 1.281406  | 3.488739  |
| O  | 2.788396  | 2.931605  | -0.141821 |
| C  | -1.014155 | 2.177758  | 1.102539  |
| H  | -0.717446 | 2.997852  | 1.752304  |
| H  | -1.683971 | 1.439152  | 1.531122  |
| C  | -0.916236 | 2.311310  | -0.263561 |
| H  | -1.461846 | 1.592898  | -0.869012 |
| C  | -0.473461 | 3.549501  | -0.995903 |
| H  | -1.383790 | 4.155967  | -1.121027 |
| H  | 0.202695  | 4.151218  | -0.378631 |
| C  | 0.121791  | 3.283318  | -2.382775 |
| H  | 1.057037  | 2.717864  | -2.324165 |
| H  | -0.579133 | 2.713389  | -3.003774 |
| H  | 0.333199  | 4.224161  | -2.897962 |

#### 41-triplet

B3LYP-D3 SCF energy (au): -1281.52185327  
 B3LYP-D3 enthalpy (au): -1281.01363927  
 B3LYP-D3 free energy (au): -1281.10934127  
 M06 SCF energy in toluene (au): -1280.93051236  
 M06 enthalpy in toluene (au): -1280.42229836  
 M06 free energy in toluene (au): -1280.51800036  
 M06 free energy in toluene (quasi-harmonic) (au): -1280.51133809

#### Cartesian coordinates

| ATOMX | Y        | Z         |           |
|-------|----------|-----------|-----------|
| C     | 1.634955 | -0.655574 | -0.593443 |
| C     | 1.454069 | -1.328004 | 0.697642  |
| C     | 3.061813 | -3.120644 | -1.440276 |
| C     | 2.556086 | -1.840738 | 1.576995  |
| C     | 3.883041 | -3.310692 | -0.142167 |
| C     | 3.087014 | -3.235356 | 1.171053  |
| H     | 3.394255 | -1.133082 | 1.581763  |
| H     | 3.333506 | -3.902407 | -2.157721 |
| H     | 4.712185 | -2.589835 | -0.108334 |
| H     | 1.995688 | -3.278803 | -1.228054 |
| H     | 2.184943 | -1.893031 | 2.606734  |
| H     | 4.357124 | -4.297716 | -0.168064 |
| H     | 3.731931 | -3.577488 | 1.988887  |
| H     | 2.243896 | -3.937213 | 1.126409  |

|    |           |           |           |
|----|-----------|-----------|-----------|
| C  | 2.950281  | -0.523451 | -1.292711 |
| H  | 3.745913  | -0.385543 | -0.552774 |
| H  | 2.955493  | 0.363967  | -1.933198 |
| C  | 3.249347  | -1.773360 | -2.153871 |
| H  | 2.602301  | -1.750708 | -3.039350 |
| H  | 4.281036  | -1.688054 | -2.515964 |
| C  | 0.086076  | -1.415627 | 0.930752  |
| C  | 0.352242  | -0.413147 | -1.141430 |
| C  | -0.637332 | -0.824710 | -0.192870 |
| C  | -2.080816 | -0.716583 | -0.334526 |
| C  | -2.655461 | -0.072760 | -1.454869 |
| C  | -2.951273 | -1.230835 | 0.643477  |
| C  | -4.023662 | 0.054400  | -1.583967 |
| H  | -2.018520 | 0.326257  | -2.237743 |
| C  | -4.330100 | -1.113407 | 0.526583  |
| H  | -2.550141 | -1.740930 | 1.513054  |
| C  | -4.880875 | -0.464665 | -0.592345 |
| H  | -4.467969 | 0.543581  | -2.443811 |
| H  | -4.966947 | -1.527899 | 1.297941  |
| H  | 0.162673  | 0.016170  | -2.114651 |
| H  | -0.367557 | -1.823971 | 1.823892  |
| O  | -6.194752 | -0.292187 | -0.809433 |
| C  | -7.128397 | -0.803698 | 0.143426  |
| H  | -6.987116 | -0.332412 | 1.122693  |
| H  | -8.113466 | -0.550239 | -0.246873 |
| H  | -7.036967 | -1.891711 | 0.236039  |
| Fe | 0.615196  | 0.824006  | 0.637916  |
| C  | 2.097333  | 1.580415  | 1.505546  |
| C  | -0.594011 | 1.310578  | 2.038246  |
| O  | -1.327085 | 1.568688  | 2.873138  |
| O  | 2.994331  | 2.037300  | 2.047048  |
| C  | -0.378485 | 2.969765  | -0.483188 |
| H  | -0.491423 | 3.638143  | 0.367537  |
| H  | -1.246356 | 2.374442  | -0.758249 |
| C  | 0.718995  | 3.023809  | -1.263399 |
| H  | 0.758473  | 2.395998  | -2.154371 |
| C  | 1.886586  | 3.946395  | -1.062738 |
| H  | 1.739521  | 4.806398  | -1.732997 |
| H  | 1.873051  | 4.351248  | -0.043421 |
| C  | 3.244753  | 3.308471  | -1.383972 |
| H  | 3.467007  | 2.467180  | -0.720136 |
| H  | 3.270018  | 2.938803  | -2.415534 |
| H  | 4.049324  | 4.040811  | -1.273234 |

#### 42

B3LYP-D3 SCF energy (au): -1690.78415982  
 B3LYP-D3 enthalpy (au): -1689.98660082  
 B3LYP-D3 free energy (au): -1690.10222582  
 M06 SCF energy in toluene (au): -1689.93116709  
 M06 enthalpy in toluene (au): -1689.13360809

M06 free energy in toluene (au): -1689.24923309  
M06 free energy in toluene (quasi-harmonic) (au): -1689.24094027

Cartesian coordinates

| ATOMX | Y         | Z         |           |
|-------|-----------|-----------|-----------|
| C     | -3.405507 | -0.225694 | -0.756480 |
| C     | -3.761962 | 0.477969  | 0.433112  |
| C     | -5.750834 | 0.983936  | -2.079437 |
| C     | -5.086576 | 0.416863  | 1.137667  |
| C     | -6.713169 | 0.826387  | -0.877340 |
| C     | -6.175536 | 1.297138  | 0.485393  |
| H     | -5.438981 | -0.620665 | 1.176385  |
| H     | -6.297383 | 1.418552  | -2.923315 |
| H     | -7.051767 | -0.216134 | -0.795881 |
| H     | -4.970828 | 1.716380  | -1.830694 |
| H     | -4.949279 | 0.737962  | 2.176225  |
| H     | -7.617778 | 1.410815  | -1.076743 |
| H     | -7.012627 | 1.338869  | 1.191919  |
| H     | -5.799693 | 2.324937  | 0.392588  |
| C     | -4.319279 | -1.122139 | -1.530975 |
| H     | -5.020693 | -1.608109 | -0.845306 |
| H     | -3.754177 | -1.918076 | -2.027147 |
| C     | -5.098785 | -0.310436 | -2.591019 |
| H     | -4.417945 | -0.059194 | -3.413755 |
| H     | -5.867495 | -0.969176 | -3.012124 |
| C     | -2.665604 | 1.357346  | 0.754115  |
| C     | -2.088474 | 0.184534  | -1.125195 |
| C     | -1.651388 | 1.226242  | -0.232289 |
| C     | -0.381933 | 1.942757  | -0.302963 |
| C     | 0.374947  | 1.935744  | -1.493440 |
| C     | 0.137242  | 2.632362  | 0.804391  |
| C     | 1.604757  | 2.562839  | -1.561377 |
| H     | -0.012498 | 1.442576  | -2.379207 |
| C     | 1.376677  | 3.260636  | 0.752914  |
| H     | -0.423435 | 2.665394  | 1.734029  |
| C     | 2.130726  | 3.211478  | -0.430425 |
| H     | 2.190808  | 2.556610  | -2.473213 |
| H     | 1.754545  | 3.765768  | 1.632795  |
| H     | -1.544884 | -0.185461 | -1.982675 |
| H     | -2.654030 | 2.046598  | 1.587873  |
| O     | 3.363742  | 3.735191  | -0.579177 |
| C     | 3.964050  | 4.405801  | 0.528863  |
| H     | 4.093037  | 3.722369  | 1.375941  |
| H     | 4.939084  | 4.740779  | 0.176047  |
| H     | 3.366758  | 5.271964  | 0.835242  |
| Fe    | -2.043563 | -0.688294 | 0.814945  |
| C     | -2.358685 | -2.421258 | 0.506619  |
| C     | -2.457666 | -0.791456 | 2.549121  |
| O     | -2.757713 | -0.810877 | 3.655943  |
| O     | -2.635340 | -3.515246 | 0.304247  |

|   |           |           |           |
|---|-----------|-----------|-----------|
| C | -0.000199 | -0.813657 | 1.701637  |
| H | 0.016783  | -1.578806 | 2.474290  |
| H | 0.152740  | 0.207720  | 2.034213  |
| C | 0.251117  | -1.156801 | 0.392274  |
| H | 0.478646  | -0.346493 | -0.293110 |
| C | 0.621580  | -2.515168 | -0.111567 |
| H | 0.264005  | -3.306132 | 0.557293  |
| C | 0.228985  | -2.779553 | -1.568378 |
| H | -0.856493 | -2.812796 | -1.708117 |
| H | 0.631152  | -1.997403 | -2.223153 |
| H | 0.636782  | -3.735777 | -1.908014 |
| H | 1.725205  | -2.500355 | -0.046279 |
| N | 3.906471  | -1.682707 | 0.011156  |
| C | 4.464760  | -1.404745 | -1.341837 |
| C | 4.340556  | -0.838173 | 1.158894  |
| C | 5.990579  | -1.160791 | -1.292164 |
| C | 4.177700  | -2.653851 | -2.187257 |
| C | 3.740177  | -0.214572 | -1.993576 |
| C | 5.871129  | -0.625653 | 1.161438  |
| C | 3.919422  | -1.598518 | 2.424229  |
| C | 3.612274  | 0.517088  | 1.156293  |
| C | 6.397326  | -0.164718 | -0.201772 |
| H | 6.342265  | -0.825271 | -2.275616 |
| H | 6.487951  | -2.120514 | -1.091558 |
| H | 3.100241  | -2.830862 | -2.273490 |
| H | 4.587835  | -2.537772 | -3.195540 |
| H | 4.637748  | -3.545524 | -1.743453 |
| H | 3.980128  | -0.173846 | -3.061704 |
| H | 2.656665  | -0.328438 | -1.886096 |
| H | 4.019919  | 0.747500  | -1.561148 |
| H | 6.355211  | -1.577533 | 1.422699  |
| H | 6.143628  | 0.090646  | 1.946920  |
| H | 4.223666  | -1.052308 | 3.322921  |
| H | 2.831664  | -1.731796 | 2.451770  |
| H | 4.386792  | -2.590129 | 2.464729  |
| H | 2.544885  | 0.379394  | 0.969615  |
| H | 3.730535  | 0.999524  | 2.133561  |
| H | 3.998355  | 1.206559  | 0.404655  |
| H | 6.018347  | 0.837493  | -0.439528 |
| H | 7.488981  | -0.076269 | -0.168690 |
| H | 4.196994  | -2.633140 | 0.242255  |

#### 42'

B3LYP-D3 SCF energy (au): -1690.78423090  
 B3LYP-D3 enthalpy (au): -1689.98662290  
 B3LYP-D3 free energy (au): -1690.10252390  
 M06 SCF energy in toluene (au): -1689.93010513  
 M06 enthalpy in toluene (au): -1689.13249713  
 M06 free energy in toluene (au): -1689.24839813  
 M06 free energy in toluene (quasi-harmonic) (au): -1689.23992823

Cartesian coordinates

| ATOMX | Y         | Z         |           |
|-------|-----------|-----------|-----------|
| C     | 3.618202  | 0.029107  | 0.773927  |
| C     | 3.766992  | 0.324025  | -0.612827 |
| C     | 6.064687  | 1.616134  | 1.259262  |
| C     | 4.971738  | 0.029011  | -1.458335 |
| C     | 6.849984  | 1.082819  | 0.036743  |
| C     | 6.094249  | 1.079643  | -1.303413 |
| H     | 5.372278  | -0.960665 | -1.210365 |
| H     | 6.702566  | 2.305024  | 1.823446  |
| H     | 7.232576  | 0.073184  | 0.242329  |
| H     | 5.216789  | 2.223147  | 0.913627  |
| H     | 4.666223  | -0.009436 | -2.509714 |
| H     | 7.738634  | 1.706979  | -0.106178 |
| H     | 6.814804  | 0.890115  | -2.107410 |
| H     | 5.679781  | 2.079312  | -1.490293 |
| C     | 4.683490  | -0.558827 | 1.644954  |
| H     | 5.298892  | -1.241364 | 1.049872  |
| H     | 4.243418  | -1.152663 | 2.452630  |
| C     | 5.567511  | 0.554259  | 2.252847  |
| H     | 5.004699  | 1.056680  | 3.049435  |
| H     | 6.425185  | 0.070572  | 2.735318  |
| C     | 2.588093  | 1.018128  | -1.033883 |
| C     | 2.359360  | 0.580741  | 1.198876  |
| C     | 1.745785  | 1.256899  | 0.102803  |
| C     | 0.474535  | 1.972602  | 0.122161  |
| C     | -0.274992 | 2.085392  | 1.313341  |
| C     | -0.056083 | 2.551623  | -1.042111 |
| C     | -1.506483 | 2.710569  | 1.327806  |
| H     | 0.110325  | 1.674329  | 2.240689  |
| C     | -1.295511 | 3.182677  | -1.043659 |
| H     | 0.502955  | 2.513659  | -1.971827 |
| C     | -2.042073 | 3.246250  | 0.142437  |
| H     | -2.088013 | 2.788896  | 2.239128  |
| H     | -1.675694 | 3.606453  | -1.964483 |
| H     | 1.983784  | 0.535594  | 2.211650  |
| H     | 2.414263  | 1.368841  | -2.041735 |
| O     | -3.274677 | 3.780625  | 0.248975  |
| C     | -3.878263 | 4.354559  | -0.911036 |
| H     | -4.012698 | 3.600864  | -1.695138 |
| H     | -4.850709 | 4.721841  | -0.584285 |
| H     | -3.279271 | 5.188751  | -1.293118 |
| Fe    | 2.050887  | -0.909611 | -0.293198 |
| C     | 2.051941  | -2.234287 | 0.903331  |
| C     | 2.571869  | -1.929261 | -1.665172 |
| O     | 2.941815  | -2.557847 | -2.549766 |
| O     | 2.121137  | -3.037613 | 1.719406  |
| C     | 0.092073  | -0.973349 | -1.372598 |
| H     | 0.069591  | -1.763168 | -2.116583 |



|   |           |           |           |
|---|-----------|-----------|-----------|
| H | 0.081272  | 0.037850  | -1.758495 |
| C | -0.312455 | -1.229957 | -0.081562 |
| H | -0.502621 | -0.375189 | 0.561922  |
| C | -0.870524 | -2.530737 | 0.413744  |
| H | -1.958059 | -2.324723 | 0.448737  |
| N | -4.055316 | -1.528264 | 0.157155  |
| C | -4.661340 | -1.018344 | 1.419099  |
| C | -4.373483 | -0.845437 | -1.127078 |
| C | -6.164159 | -0.702931 | 1.242735  |
| C | -4.490643 | -2.140087 | 2.453488  |
| C | -3.898469 | 0.216021  | 1.930155  |
| C | -5.884777 | -0.548363 | -1.252126 |
| C | -3.939856 | -1.811490 | -2.238634 |
| C | -3.556574 | 0.448751  | -1.280642 |
| C | -6.448922 | 0.139891  | -0.004616 |
| H | -6.544747 | -0.205026 | 2.143092  |
| H | -6.709994 | -1.653201 | 1.154704  |
| H | -3.430149 | -2.359619 | 2.621061  |
| H | -4.937270 | -1.852294 | 3.410518  |
| H | -4.983787 | -3.062297 | 2.121665  |
| H | -4.182249 | 0.422256  | 2.968012  |
| H | -2.819831 | 0.032164  | 1.897167  |
| H | -4.104121 | 1.119533  | 1.353714  |
| H | -6.416049 | -1.499411 | -1.400097 |
| H | -6.069955 | 0.056877  | -2.148648 |
| H | -4.165609 | -1.392818 | -3.224702 |
| H | -2.862315 | -2.005703 | -2.184491 |
| H | -4.465231 | -2.771039 | -2.157430 |
| H | -2.507644 | 0.272780  | -1.030155 |
| H | -3.608305 | 0.795636  | -2.319231 |
| H | -3.921524 | 1.257724  | -0.647288 |
| H | -6.017844 | 1.143136  | 0.106771  |
| H | -7.529334 | 0.284364  | -0.116319 |
| H | -4.391448 | -2.486057 | 0.053341  |
| H | -0.570027 | -2.702670 | 1.454082  |
| C | -0.605808 | -3.766094 | -0.445064 |
| H | -1.053527 | -4.648054 | 0.021419  |
| H | -1.047025 | -3.664267 | -1.442318 |
| H | 0.464394  | -3.970112 | -0.569581 |

### 43

B3LYP-D3 SCF energy (au): -1281.13576085  
 B3LYP-D3 enthalpy (au): -1280.63860485  
 B3LYP-D3 free energy (au): -1280.72735585  
 M06 SCF energy in toluene (au): -1280.51401683  
 M06 enthalpy in toluene (au): -1280.01686083  
 M06 free energy in toluene (au): -1280.10561183  
 M06 free energy in toluene (quasi-harmonic) (au): -1280.10006198  
 M06 SCF energy in dichloromethane (au): -1280.517295  
 M06 enthalpy in dichloromethane (au): -1280.020139

M06 free energy in dichloromethane (au): -1280.10889  
M06 free energy in dichloromethane (quasi-harmonic) (au): -1280.10334

Cartesian coordinates

| ATOMX | Y         | Z         |           |
|-------|-----------|-----------|-----------|
| C     | 1.533154  | 1.357246  | 0.395801  |
| C     | 1.720602  | 0.280767  | -0.546941 |
| C     | 3.169892  | 3.063212  | -1.391297 |
| C     | 3.035393  | -0.242041 | -1.050804 |
| C     | 4.227859  | 1.985741  | -1.734051 |
| C     | 3.678227  | 0.612517  | -2.161035 |
| H     | 3.746216  | -0.331939 | -0.219356 |
| H     | 3.436724  | 4.002093  | -1.891274 |
| H     | 4.915765  | 1.851111  | -0.886850 |
| H     | 2.200637  | 2.768298  | -1.812827 |
| H     | 2.872672  | -1.257177 | -1.426100 |
| H     | 4.848482  | 2.354949  | -2.559334 |
| H     | 4.506610  | 0.029447  | -2.584087 |
| H     | 2.951841  | 0.752154  | -2.973702 |
| C     | 2.641847  | 2.168166  | 0.992312  |
| H     | 3.525579  | 1.533219  | 1.119610  |
| H     | 2.363817  | 2.518512  | 1.992681  |
| C     | 2.996580  | 3.379076  | 0.103295  |
| H     | 2.207017  | 4.134931  | 0.206581  |
| H     | 3.917725  | 3.833960  | 0.491215  |
| C     | 0.431417  | -0.133130 | -0.972164 |
| C     | 0.141770  | 1.565700  | 0.537804  |
| C     | -0.568908 | 0.636239  | -0.310008 |
| C     | -2.024896 | 0.514855  | -0.468518 |
| C     | -2.592991 | -0.571729 | -1.160485 |
| C     | -2.896480 | 1.468786  | 0.068958  |
| C     | -3.965787 | -0.698552 | -1.299323 |
| H     | -1.949811 | -1.333818 | -1.587920 |
| C     | -4.280899 | 1.354345  | -0.060844 |
| H     | -2.495477 | 2.326888  | 0.599479  |
| C     | -4.824635 | 0.263686  | -0.747654 |
| H     | -4.401900 | -1.539084 | -1.829137 |
| H     | -4.917545 | 2.116674  | 0.371885  |
| H     | -0.309244 | 2.288363  | 1.204823  |
| H     | 0.255103  | -0.959168 | -1.644675 |
| O     | -6.157230 | 0.050003  | -0.936517 |
| C     | -7.064582 | 0.985984  | -0.379855 |
| H     | -6.920670 | 1.988091  | -0.805222 |
| H     | -8.062434 | 0.625372  | -0.634706 |
| H     | -6.965180 | 1.041293  | 0.712195  |
| Fe    | 0.608657  | -0.421695 | 1.137713  |
| C     | -0.584560 | -0.442966 | 2.430718  |
| C     | 1.983121  | -0.928555 | 2.100618  |
| O     | 2.921414  | -1.250956 | 2.695872  |
| O     | -1.394754 | -0.443287 | 3.253594  |

|   |           |           |           |
|---|-----------|-----------|-----------|
| C | 0.146092  | -2.416957 | 0.816444  |
| H | 0.059815  | -2.907514 | 1.791987  |
| H | -0.840942 | -2.424758 | 0.341929  |
| C | 1.165784  | -3.098141 | -0.013130 |
| H | 2.139243  | -3.255804 | 0.458265  |
| C | 1.014940  | -3.516702 | -1.279633 |
| H | 0.045068  | -3.381964 | -1.764652 |
| C | 2.082339  | -4.182739 | -2.100627 |
| H | 2.311397  | -3.612158 | -3.012456 |
| H | 3.011985  | -4.287778 | -1.529827 |
| H | 1.775291  | -5.185010 | -2.430130 |

### 43'

B3LYP-D3 SCF energy (au): -1281.13186078  
 B3LYP-D3 enthalpy (au): -1280.63466378  
 B3LYP-D3 free energy (au): -1280.72460678  
 M06 SCF energy in toluene (au): -1280.51241684  
 M06 enthalpy in toluene (au): -1280.01521984  
 M06 free energy in toluene (au): -1280.10516284  
 M06 free energy in toluene (quasi-harmonic) (au): -1280.09908006

### Cartesian coordinates

| ATOMX | Y         | Z         |           |
|-------|-----------|-----------|-----------|
| C     | -1.609534 | -1.189141 | 0.700629  |
| C     | -1.630127 | -0.786570 | -0.684805 |
| C     | -3.140191 | -3.600905 | -0.102281 |
| C     | -2.850211 | -0.621576 | -1.545753 |
| C     | -4.093304 | -2.877141 | -1.084923 |
| C     | -3.423251 | -1.939257 | -2.105348 |
| H     | -3.638414 | -0.104769 | -0.984090 |
| H     | -3.405188 | -4.664197 | -0.060666 |
| H     | -4.855650 | -2.315965 | -0.525699 |
| H     | -2.116506 | -3.565988 | -0.495860 |
| H     | -2.592664 | 0.036621  | -2.384119 |
| H     | -4.646122 | -3.631795 | -1.657031 |
| H     | -4.167498 | -1.675075 | -2.867818 |
| H     | -2.625442 | -2.485677 | -2.627207 |
| C     | -2.820870 | -1.573357 | 1.493202  |
| H     | -3.676171 | -0.976128 | 1.158054  |
| H     | -2.673638 | -1.336364 | 2.552837  |
| C     | -3.144922 | -3.074730 | 1.342129  |
| H     | -2.414008 | -3.653121 | 1.922164  |
| H     | -4.125994 | -3.263574 | 1.797896  |
| C     | -0.280566 | -0.644298 | -1.099663 |
| C     | -0.256498 | -1.266929 | 1.104370  |
| C     | 0.595377  | -0.921956 | -0.008478 |
| C     | 2.064446  | -0.877291 | -0.022822 |
| C     | 2.808599  | -0.920431 | 1.171423  |
| C     | 2.773832  | -0.779777 | -1.225524 |
| C     | 4.192680  | -0.864330 | 1.160359  |

|    |           |           |           |
|----|-----------|-----------|-----------|
| H  | 2.294784  | -0.979404 | 2.125662  |
| C  | 4.167716  | -0.718105 | -1.253277 |
| H  | 2.235748  | -0.760841 | -2.167965 |
| C  | 4.886930  | -0.760202 | -0.054504 |
| H  | 4.763581  | -0.890932 | 2.082638  |
| H  | 4.674837  | -0.643638 | -2.207750 |
| H  | 0.078163  | -1.534809 | 2.097772  |
| H  | 0.025254  | -0.299500 | -2.077586 |
| O  | 6.245412  | -0.709832 | 0.039277  |
| C  | 6.988863  | -0.581090 | -1.160728 |
| H  | 8.037872  | -0.547279 | -0.862226 |
| H  | 6.828189  | -1.438525 | -1.827690 |
| H  | 6.732227  | 0.343082  | -1.695115 |
| Fe | -0.682125 | 0.730775  | 0.485262  |
| C  | 0.333348  | 1.480281  | 1.712075  |
| C  | -2.142641 | 1.643264  | 0.835913  |
| O  | -3.141396 | 2.184537  | 1.047574  |
| O  | 1.027702  | 1.924780  | 2.521496  |
| C  | -0.093177 | 2.185285  | -0.858008 |
| H  | 0.940023  | 1.907579  | -1.094151 |
| H  | -0.713257 | 2.024548  | -1.743864 |
| C  | -0.164679 | 3.585300  | -0.376803 |
| H  | 0.649513  | 3.894315  | 0.280879  |
| C  | -1.123167 | 4.493792  | -0.625747 |
| H  | -1.024947 | 5.477811  | -0.167496 |
| C  | -2.348541 | 4.296987  | -1.472969 |
| H  | -2.401542 | 5.045455  | -2.275734 |
| H  | -2.379996 | 3.306480  | -1.936221 |
| H  | -3.262301 | 4.408722  | -0.874008 |

### 43-triplet

B3LYP-D3 SCF energy (au): -1281.09654062  
 B3LYP-D3 enthalpy (au): -1280.60232862  
 B3LYP-D3 free energy (au): -1280.69698362  
 M06 SCF energy in toluene (au): -1280.48033538  
 M06 enthalpy in toluene (au): -1279.98612338  
 M06 free energy in toluene (au): -1280.08077838  
 M06 free energy in toluene (quasi-harmonic) (au): -1280.07412376

### Cartesian coordinates

| ATOMX | Y         | Z         |           |
|-------|-----------|-----------|-----------|
| C     | -1.495526 | -1.402156 | 0.459348  |
| C     | -1.695608 | -0.439858 | -0.559989 |
| C     | -3.185273 | -3.295233 | -1.086846 |
| C     | -3.014373 | 0.030637  | -1.100367 |
| C     | -4.237738 | -2.246579 | -1.522449 |
| C     | -3.683585 | -0.932077 | -2.102105 |
| H     | -3.714387 | 0.211969  | -0.272294 |
| H     | -3.478814 | -4.280096 | -1.470311 |
| H     | -4.909141 | -2.016056 | -0.682574 |

|    |           |           |           |
|----|-----------|-----------|-----------|
| H  | -2.224439 | -3.063617 | -1.562883 |
| H  | -2.858224 | 0.999280  | -1.586434 |
| H  | -4.876953 | -2.692611 | -2.294071 |
| H  | -4.514448 | -0.390059 | -2.572968 |
| H  | -2.971256 | -1.165250 | -2.905499 |
| C  | -2.588075 | -2.141390 | 1.164683  |
| H  | -3.470039 | -1.493538 | 1.243266  |
| H  | -2.289236 | -2.382533 | 2.191890  |
| C  | -2.973983 | -3.442995 | 0.428460  |
| H  | -2.185657 | -4.188963 | 0.594633  |
| H  | -3.886655 | -3.844640 | 0.889294  |
| C  | -0.399920 | -0.012001 | -1.006519 |
| C  | -0.090630 | -1.543633 | 0.650804  |
| C  | 0.606842  | -0.738568 | -0.308380 |
| C  | 2.058832  | -0.594687 | -0.451249 |
| C  | 2.619662  | 0.492410  | -1.151417 |
| C  | 2.942651  | -1.529010 | 0.104946  |
| C  | 3.991483  | 0.636124  | -1.283578 |
| H  | 1.967654  | 1.242424  | -1.588129 |
| C  | 4.326166  | -1.394774 | -0.014735 |
| H  | 2.547731  | -2.390379 | 0.635182  |
| C  | 4.859890  | -0.306398 | -0.713144 |
| H  | 4.419810  | 1.476856  | -1.819679 |
| H  | 4.970676  | -2.142938 | 0.431259  |
| H  | 0.369945  | -2.187759 | 1.389354  |
| H  | -0.238983 | 0.718972  | -1.785839 |
| O  | 6.191971  | -0.075941 | -0.895005 |
| C  | 7.106733  | -0.992862 | -0.320626 |
| H  | 6.978886  | -2.002223 | -0.734107 |
| H  | 8.102031  | -0.623004 | -0.572654 |
| H  | 7.000498  | -1.036572 | 0.771483  |
| Fe | -0.534096 | 0.628575  | 1.079454  |
| C  | 0.523687  | 0.742356  | 2.547390  |
| C  | -2.214542 | 1.158720  | 2.132716  |
| O  | -2.919449 | 1.961709  | 2.554057  |
| O  | 1.249823  | 0.786037  | 3.442258  |
| C  | -0.249224 | 2.609048  | 0.620052  |
| H  | -0.248835 | 3.187215  | 1.549115  |
| H  | 0.761552  | 2.616498  | 0.194307  |
| C  | -1.267577 | 3.101106  | -0.331134 |
| H  | -2.264111 | 3.274627  | 0.081700  |
| C  | -1.089656 | 3.338225  | -1.641566 |
| H  | -0.096875 | 3.188820  | -2.071885 |
| C  | -2.159232 | 3.812004  | -2.582843 |
| H  | -2.323203 | 3.098937  | -3.403762 |
| H  | -3.113774 | 3.947540  | -2.061917 |
| H  | -1.892032 | 4.769236  | -3.051485 |

44

B3LYP-D3 SCF energy (au): -1951.33466569

B3LYP-D3 enthalpy (au): -1950.69619369  
B3LYP-D3 free energy (au): -1950.80632469  
M06 SCF energy in toluene (au): -1950.54539642  
M06 enthalpy in toluene (au): -1949.90692442  
M06 free energy in toluene (au): -1950.01705542  
M06 free energy in toluene (quasi-harmonic) (au): -1950.00935973

Cartesian coordinates

| ATOMX | Y         | Z         |           |
|-------|-----------|-----------|-----------|
| Fe    | -1.480878 | 0.462125  | -0.309952 |
| C     | -1.732299 | 1.926743  | 0.692326  |
| O     | -2.011844 | 2.808146  | 1.367558  |
| C     | -1.712627 | 1.347763  | -1.844094 |
| O     | -1.928075 | 1.842736  | -2.855195 |
| C     | 0.590120  | 0.690249  | -1.043439 |
| H     | 0.709525  | 1.642926  | -1.540901 |
| H     | 0.707211  | -0.217693 | -1.625250 |
| C     | 0.735967  | 0.635111  | 0.329386  |
| H     | 0.890202  | -0.346826 | 0.762386  |
| C     | 1.162596  | 1.768748  | 1.213071  |
| H     | 0.550713  | 2.655383  | 1.077682  |
| C     | 1.123785  | 1.369196  | 2.688045  |
| H     | 1.686623  | 0.448085  | 2.876219  |
| H     | 1.544546  | 2.161324  | 3.315851  |
| H     | 0.089241  | 1.204076  | 3.016918  |
| C     | 2.579611  | 2.271971  | 0.694159  |
| O     | 2.439947  | 2.894448  | -0.534005 |
| B     | 1.513984  | 4.040619  | -0.658763 |
| F     | 1.411309  | 4.721331  | 0.562071  |
| F     | 1.935607  | 4.841550  | -1.694721 |
| F     | 0.183280  | 3.531270  | -0.973153 |
| H     | 2.921876  | 2.976202  | 1.468902  |
| C     | 3.557215  | 1.113904  | 0.583564  |
| C     | 4.132011  | 0.536605  | 1.723334  |
| C     | 3.849056  | 0.556534  | -0.666976 |
| C     | 4.938439  | -0.597893 | 1.623060  |
| H     | 3.957360  | 0.985267  | 2.697398  |
| C     | 4.661932  | -0.573001 | -0.770753 |
| H     | 3.443651  | 1.041662  | -1.546821 |
| C     | 5.200764  | -1.163451 | 0.373829  |
| H     | 5.374373  | -1.031675 | 2.519298  |
| H     | 4.888225  | -0.981498 | -1.753292 |
| H     | 5.831810  | -2.044016 | 0.296519  |
| C     | -3.049679 | -0.501081 | 0.762459  |
| C     | -3.217673 | -0.689564 | -0.639172 |
| C     | -6.197900 | -1.217422 | 1.077339  |
| C     | -4.456457 | -0.348160 | -1.407105 |
| C     | -5.704116 | -2.173181 | -0.035928 |
| C     | -5.451491 | -1.528906 | -1.408558 |
| H     | -4.924645 | 0.534156  | -0.957941 |

|   |           |           |           |
|---|-----------|-----------|-----------|
| H | -6.618205 | -0.304407 | 0.632248  |
| H | -6.446397 | -2.965805 | -0.184822 |
| H | -7.031434 | -1.696084 | 1.604045  |
| H | -4.210172 | -0.078918 | -2.439694 |
| H | -4.792344 | -2.684252 | 0.300089  |
| H | -6.400655 | -1.171987 | -1.827770 |
| H | -5.080332 | -2.303228 | -2.092185 |
| C | -4.040134 | 0.131878  | 1.697657  |
| H | -4.492701 | 1.012719  | 1.227748  |
| H | -3.507136 | 0.493307  | 2.583905  |
| C | -5.160197 | -0.830025 | 2.146186  |
| H | -4.707898 | -1.742084 | 2.558993  |
| H | -5.686490 | -0.343734 | 2.976604  |
| C | -2.079165 | -1.426681 | -1.116530 |
| C | -1.795522 | -1.084029 | 1.128777  |
| C | -1.219848 | -1.722004 | -0.020669 |
| C | 0.051152  | -2.446352 | -0.060968 |
| C | 0.719994  | -2.796059 | 1.130167  |
| C | 0.683058  | -2.746797 | -1.276174 |
| C | 1.972365  | -3.382357 | 1.105218  |
| H | 0.255847  | -2.593429 | 2.089923  |
| C | 1.943076  | -3.335613 | -1.317675 |
| H | 0.198787  | -2.495560 | -2.214781 |
| C | 2.604691  | -3.644384 | -0.121248 |
| H | 2.496333  | -3.632845 | 2.020735  |
| H | 2.405386  | -3.531342 | -2.276926 |
| H | -1.379489 | -1.075001 | 2.126183  |
| H | -1.933747 | -1.738365 | -2.141809 |
| O | 3.834772  | -4.200574 | -0.044058 |
| C | 4.556468  | -4.407821 | -1.251690 |
| H | 5.522883  | -4.815705 | -0.953743 |
| H | 4.043569  | -5.125122 | -1.904470 |
| H | 4.705072  | -3.462817 | -1.786419 |

#### 44'

B3LYP-D3 SCF energy (au): -1951.31966855  
 B3LYP-D3 enthalpy (au): -1950.68147955  
 B3LYP-D3 free energy (au): -1950.79265355  
 M06 SCF energy in toluene (au): -1950.53972438  
 M06 enthalpy in toluene (au): -1949.90153538  
 M06 free energy in toluene (au): -1950.01270938  
 M06 free energy in toluene (quasi-harmonic) (au): -1950.00469583

#### Cartesian coordinates

| ATOMX | Y         | Z         |           |
|-------|-----------|-----------|-----------|
| Fe    | -1.680322 | -0.458516 | 0.818712  |
| C     | -1.665714 | -2.180598 | 0.301582  |
| O     | -1.762124 | -3.263903 | -0.053485 |
| C     | -2.174940 | -0.818271 | 2.485451  |
| O     | -2.531739 | -1.002221 | 3.562431  |

|   |           |           |           |
|---|-----------|-----------|-----------|
| C | 0.301192  | -0.450561 | 1.809193  |
| H | 0.391170  | -1.347942 | 2.417944  |
| H | 0.299934  | 0.495610  | 2.343013  |
| C | 0.739363  | -0.492774 | 0.495540  |
| H | 0.894957  | 0.457803  | -0.002972 |
| C | 1.283497  | -1.675868 | -0.184044 |
| H | 0.871529  | -2.595476 | 0.229904  |
| C | 1.118769  | -1.661973 | -1.700665 |
| H | 1.648111  | -2.521785 | -2.111571 |
| H | 0.061769  | -1.748451 | -1.982913 |
| H | 1.521617  | -0.740940 | -2.140101 |
| C | 2.849914  | -1.815090 | 0.233709  |
| O | 3.350859  | -2.955821 | -0.323457 |
| B | 2.724899  | -4.253903 | 0.092368  |
| F | 3.689807  | -5.234303 | 0.025820  |
| F | 2.200405  | -4.109170 | 1.401055  |
| F | 1.648178  | -4.528739 | -0.782836 |
| H | 2.829281  | -1.863512 | 1.332856  |
| C | 3.641874  | -0.597184 | -0.200756 |
| C | 3.691837  | 0.549763  | 0.601043  |
| C | 4.331673  | -0.599283 | -1.418043 |
| C | 4.406691  | 1.677628  | 0.195342  |
| H | 3.187608  | 0.551793  | 1.564624  |
| C | 5.042970  | 0.527565  | -1.830811 |
| H | 4.320691  | -1.507846 | -2.009382 |
| C | 5.083861  | 1.669243  | -1.026359 |
| H | 4.447478  | 2.550750  | 0.840949  |
| H | 5.583210  | 0.508701  | -2.773834 |
| H | 5.666250  | 2.533484  | -1.337265 |
| C | -2.934452 | -0.030048 | -0.846323 |
| C | -3.517148 | 0.466441  | 0.357010  |
| C | -5.320571 | 0.917309  | -2.302995 |
| C | -4.872823 | 0.112655  | 0.898323  |
| C | -6.349579 | 0.470388  | -1.236095 |
| C | -6.033681 | 0.867636  | 0.217153  |
| H | -5.040691 | -0.966643 | 0.800592  |
| H | -5.853175 | 1.352678  | -3.156177 |
| H | -6.502094 | -0.616854 | -1.290369 |
| H | -4.703837 | 1.730085  | -1.897071 |
| H | -4.891186 | 0.331581  | 1.972129  |
| H | -7.321338 | 0.913921  | -1.481160 |
| H | -6.930396 | 0.693273  | 0.824358  |
| H | -5.835881 | 1.947369  | 0.262194  |
| C | -3.602055 | -0.971124 | -1.800049 |
| H | -4.267677 | -1.640742 | -1.245505 |
| H | -2.862093 | -1.603819 | -2.300722 |
| C | -4.409063 | -0.188592 | -2.858980 |
| H | -3.709125 | 0.262562  | -3.573511 |
| H | -5.009872 | -0.911356 | -3.424676 |
| C | -2.619640 | 1.461791  | 0.886757  |



|   |           |          |           |
|---|-----------|----------|-----------|
| C | -1.677176 | 0.621919 | -1.025317 |
| C | -1.504187 | 1.596483 | 0.017269  |
| C | -0.365083 | 2.501028 | 0.165369  |
| C | 0.453429  | 2.792816 | -0.936087 |
| C | -0.027890 | 3.067821 | 1.409612  |
| C | 1.576021  | 3.603636 | -0.814679 |
| H | 0.214399  | 2.377881 | -1.910005 |
| C | 1.089823  | 3.872969 | 1.546381  |
| H | -0.636967 | 2.855816 | 2.283515  |
| C | 1.907951  | 4.141942 | 0.435590  |
| H | 2.194419  | 3.786907 | -1.683465 |
| H | 1.363627  | 4.299816 | 2.505196  |
| H | -0.991113 | 0.433202 | -1.838145 |
| H | -2.797871 | 2.041766 | 1.782519  |
| O | 2.989004  | 4.920000 | 0.673632  |
| C | 3.819417  | 5.274024 | -0.429413 |
| H | 3.257535  | 5.852390 | -1.173144 |
| H | 4.616485  | 5.890295 | -0.012657 |
| H | 4.247917  | 4.383949 | -0.901095 |

#### 45

B3LYP-D3 SCF energy (au): -1236.67478628  
 B3LYP-D3 enthalpy (au): -1236.12961728  
 B3LYP-D3 free energy (au): -1236.21535028  
 M06 SCF energy in toluene (au): -1236.14293134  
 M06 enthalpy in toluene (au): -1235.59776234  
 M06 free energy in toluene (au): -1235.68349534  
 M06 free energy in toluene (quasi-harmonic) (au): -1235.69152706

#### Cartesian coordinates

| ATOMX | Y         | Z         |           |
|-------|-----------|-----------|-----------|
| C     | -5.372586 | -1.136464 | 0.648108  |
| H     | -5.787842 | -0.307594 | 1.219634  |
| H     | -6.085180 | -1.844069 | 0.232505  |
| C     | -4.059587 | -1.273371 | 0.465083  |
| H     | -3.665890 | -2.099450 | -0.123797 |
| C     | -3.019418 | -0.330951 | 1.018871  |
| H     | -3.538702 | 0.552769  | 1.411960  |
| C     | -2.274014 | -1.023755 | 2.173000  |
| H     | -2.963223 | -1.207462 | 3.003558  |
| H     | -1.881565 | -1.987858 | 1.840152  |
| H     | -1.431821 | -0.432920 | 2.548818  |
| C     | -2.079765 | 0.149379  | -0.121675 |
| O     | -0.983993 | -0.748174 | -0.309962 |
| B     | -0.963241 | -1.484224 | -1.599869 |
| F     | -0.960625 | -0.571481 | -2.665190 |
| F     | 0.277273  | -2.213978 | -1.609494 |
| F     | -2.025242 | -2.366702 | -1.697614 |
| C     | -1.531580 | 1.561225  | 0.043041  |
| C     | -1.328752 | 2.184667  | 1.280052  |

|   |           |           |           |
|---|-----------|-----------|-----------|
| C | -1.191224 | 2.266406  | -1.122235 |
| C | -0.799725 | 3.477109  | 1.352194  |
| H | -1.601307 | 1.674911  | 2.197767  |
| C | -0.672180 | 3.558074  | -1.054519 |
| H | -1.336898 | 1.778334  | -2.081176 |
| C | -0.472829 | 4.169507  | 0.186250  |
| H | -0.653539 | 3.944648  | 2.322319  |
| H | -0.425544 | 4.089380  | -1.969854 |
| H | -0.070334 | 5.177051  | 0.242843  |
| H | -2.676063 | 0.160048  | -1.039920 |
| H | 0.679202  | -0.323748 | 0.007091  |
| N | 1.687576  | -0.616655 | -0.071079 |
| C | 2.525329  | 0.471902  | -0.726586 |
| C | 2.112427  | -1.260484 | 1.240445  |
| C | 3.989820  | 0.004189  | -0.732379 |
| C | 1.993786  | 0.593517  | -2.160381 |
| C | 2.342947  | 1.803309  | 0.009264  |
| C | 3.602774  | -1.623440 | 1.140197  |
| C | 1.259958  | -2.529084 | 1.379834  |
| C | 1.816029  | -0.312086 | 2.408557  |
| C | 4.481584  | -0.475036 | 0.636477  |
| H | 4.606675  | 0.829799  | -1.104297 |
| H | 4.093997  | -0.816945 | -1.455017 |
| H | 0.943669  | 0.888498  | -2.176450 |
| H | 2.582053  | 1.344698  | -2.696513 |
| H | 2.072303  | -0.357584 | -2.695948 |
| H | 2.725215  | 2.608004  | -0.625615 |
| H | 1.289142  | 2.009448  | 0.202109  |
| H | 2.884992  | 1.845980  | 0.955347  |
| H | 3.707637  | -2.476423 | 0.455802  |
| H | 3.934290  | -1.969785 | 2.125537  |
| H | 1.547768  | -3.055571 | 2.295034  |
| H | 0.198597  | -2.281185 | 1.427566  |
| H | 1.403913  | -3.200672 | 0.528795  |
| H | 0.807450  | 0.103698  | 2.325976  |
| H | 1.872306  | -0.877064 | 3.343877  |
| H | 2.522371  | 0.516181  | 2.478406  |
| H | 4.486081  | 0.351956  | 1.356003  |
| H | 5.519284  | -0.816611 | 0.555545  |
| H | 1.555474  | -1.375596 | -0.762365 |

#### 45'

B3LYP-D3 SCF energy (au): -1236.67466083  
 B3LYP-D3 enthalpy (au): -1236.12987983 .544781  
 B3LYP-D3 free energy (au): -1236.21571383 .458948  
 M06 SCF energy in toluene (au): -1236.14174296  
 M06 enthalpy in toluene (au): -1235.59696196 .544781  
 M06 free energy in toluene (au): -1235.68279596 .458948  
 M06 free energy in toluene (quasi-harmonic) (au): -1235.69050613

Cartesian coordinates

| ATOMX | Y         | Z         |           |
|-------|-----------|-----------|-----------|
| C     | -1.548753 | -3.726971 | -0.087751 |
| H     | -1.570390 | -3.278054 | 0.898376  |
| H     | -1.373640 | -4.799426 | -0.137728 |
| C     | -1.709806 | -3.024598 | -1.210217 |
| H     | -1.665143 | -3.552442 | -2.165789 |
| C     | -2.029069 | -1.554401 | -1.365588 |
| H     | -1.286527 | -1.143451 | -2.068800 |
| C     | -3.417177 | -1.422681 | -2.025237 |
| H     | -3.472932 | -2.032404 | -2.933753 |
| H     | -4.193921 | -1.778391 | -1.338671 |
| H     | -3.644330 | -0.387166 | -2.292714 |
| C     | -1.959001 | -0.726005 | -0.070503 |
| O     | -0.662807 | -0.842549 | 0.511118  |
| B     | -0.584835 | -0.881862 | 1.996020  |
| F     | -1.388060 | -1.891912 | 2.509371  |
| F     | 0.796688  | -1.147274 | 2.295551  |
| F     | -0.932740 | 0.354161  | 2.545382  |
| H     | -2.690092 | -1.140343 | 0.633927  |
| C     | -2.279835 | 0.750702  | -0.277380 |
| C     | -1.832585 | 1.460268  | -1.399837 |
| C     | -2.977635 | 1.449770  | 0.713553  |
| C     | -2.075762 | 2.828946  | -1.530738 |
| H     | -1.300124 | 0.941757  | -2.192566 |
| C     | -3.221259 | 2.817521  | 0.590036  |
| H     | -3.305190 | 0.918760  | 1.600923  |
| C     | -2.770784 | 3.513621  | -0.532938 |
| H     | -1.726671 | 3.357395  | -2.414215 |
| H     | -3.761901 | 3.340567  | 1.374029  |
| H     | -2.962872 | 4.578414  | -0.631938 |
| H     | 0.770531  | -0.080533 | -0.007539 |
| N     | 1.807863  | 0.021458  | 0.152425  |
| C     | 2.538490  | -0.948810 | -0.765887 |
| C     | 2.211158  | 1.485294  | 0.258154  |
| C     | 4.049806  | -0.749092 | -0.568526 |
| C     | 2.116217  | -2.356677 | -0.320479 |
| C     | 2.102301  | -0.730431 | -2.219251 |
| C     | 3.738691  | 1.540122  | 0.419987  |
| C     | 1.508266  | 2.020588  | 1.512686  |
| C     | 1.727654  | 2.273737  | -0.962694 |
| C     | 4.489507  | 0.716916  | -0.631306 |
| H     | 4.573385  | -1.349302 | -1.321063 |
| H     | 4.329028  | -1.160733 | 0.411030  |
| H     | 1.045308  | -2.518634 | -0.464673 |
| H     | 2.671902  | -3.094526 | -0.908156 |
| H     | 2.333503  | -2.519633 | 0.738978  |
| H     | 2.456236  | -1.573045 | -2.820916 |
| H     | 1.010537  | -0.704364 | -2.294684 |
| H     | 2.503898  | 0.182897  | -2.660299 |

|   |          |           |           |
|---|----------|-----------|-----------|
| H | 3.999335 | 1.164037  | 1.418959  |
| H | 4.046841 | 2.591064  | 0.389994  |
| H | 1.788263 | 3.068725  | 1.657547  |
| H | 0.421308 | 1.951129  | 1.429813  |
| H | 1.800095 | 1.456683  | 2.403848  |
| H | 0.658629 | 2.117656  | -1.128352 |
| H | 1.877094 | 3.339844  | -0.765430 |
| H | 2.268337 | 2.030284  | -1.878429 |
| H | 4.321849 | 1.128017  | -1.633873 |
| H | 5.567718 | 0.783446  | -0.449146 |
| H | 1.835989 | -0.380413 | 1.106043  |

### BF3

B3LYP-D3 SCF energy (au): -324.551160925  
 B3LYP-D3 enthalpy (au): -324.534169925  
 B3LYP-D3 free energy (au): -324.563078925  
 M06 SCF energy in toluene (au): -324.551174561  
 M06 enthalpy in toluene (au): -324.534183561  
 M06 free energy in toluene (au): -324.563092561  
 M06 free energy in toluene (quasi-harmonic) (au): -324.563398636

#### Cartesian coordinates

| ATOMX | Y         | Z         |
|-------|-----------|-----------|
| B     | 0.000000  | 0.000000  |
| F     | -0.000000 | 1.317971  |
| F     | 1.141396  | -0.658985 |
| F     | -1.141396 | -0.658985 |

### butene

B3LYP-D3 SCF energy (au): -157.230749590  
 B3LYP-D3 enthalpy (au): -157.115444590  
 B3LYP-D3 free energy (au): -157.149124590  
 M06 SCF energy in toluene (au): -157.128466782  
 M06 enthalpy in toluene (au): -157.013161782  
 M06 free energy in toluene (au): -157.046841782  
 M06 free energy in toluene (quasi-harmonic) (au): -157.049303192

#### Cartesian coordinates

| ATOMX | Y         | Z         |
|-------|-----------|-----------|
| C     | 1.854724  | 0.012154  |
| H     | 1.945869  | 0.911096  |
| H     | 2.734093  | -0.623221 |
| C     | 0.721232  | -0.287646 |
| H     | 0.670988  | -1.201961 |
| C     | -0.540912 | 0.528272  |
| H     | -0.807566 | 0.847621  |
| H     | -0.365807 | 1.442826  |
| C     | -1.720934 | -0.254098 |
| H     | -1.507049 | -0.548853 |
| H     | -1.919041 | -1.167978 |

H -2.636150 0.348379 -0.292345

**cis-TS2**

B3LYP-D3 SCF energy (au): -1951.33433919

B3LYP-D3 enthalpy (au): -1950.69790019

B3LYP-D3 free energy (au): -1950.80824319

M06 SCF energy in toluene (au): -1950.52552795

M06 enthalpy in toluene (au): -1949.88908895

M06 free energy in toluene (au): -1949.99943195

M06 free energy in toluene (quasi-harmonic) (au): -1949.99181276

Cartesian coordinates

| ATOMX | Y         | Z         |           |
|-------|-----------|-----------|-----------|
| Fe    | 1.766106  | -1.041628 | -0.504838 |
| C     | 1.931736  | -2.279472 | 0.750605  |
| O     | 2.100866  | -3.056055 | 1.584921  |
| C     | 2.054964  | -2.117802 | -1.871080 |
| O     | 2.253249  | -2.789932 | -2.786883 |
| C     | -0.312037 | -1.454062 | -0.874968 |
| H     | -0.491549 | -2.480662 | -1.189690 |
| H     | -0.527327 | -0.720508 | -1.648078 |
| C     | -0.690969 | -1.107366 | 0.445690  |
| H     | -0.669162 | -0.057604 | 0.696471  |
| C     | -1.214165 | -1.916325 | 1.459337  |
| H     | -1.066047 | -1.545178 | 2.470147  |
| C     | -1.400600 | -3.401647 | 1.312312  |
| H     | -2.099325 | -3.782011 | 2.066298  |
| H     | -1.795075 | -3.666315 | 0.325742  |
| H     | -0.454626 | -3.940753 | 1.453130  |
| C     | -3.083090 | -0.935117 | 1.414426  |
| O     | -2.873815 | 0.344012  | 1.575752  |
| B     | -2.306184 | 0.908089  | 2.868810  |
| F     | -0.891143 | 0.818041  | 2.782642  |
| F     | -2.703818 | 2.230992  | 2.900726  |
| F     | -2.765426 | 0.146935  | 3.927955  |
| H     | -3.370874 | -1.506648 | 2.300109  |
| C     | -3.684198 | -1.348073 | 0.131522  |
| C     | -4.357126 | -2.572080 | 0.020023  |
| C     | -3.576493 | -0.516880 | -0.994080 |
| C     | -4.908802 | -2.962675 | -1.199792 |
| H     | -4.455700 | -3.211537 | 0.892935  |
| C     | -4.131956 | -0.906304 | -2.208719 |
| H     | -3.058954 | 0.428797  | -0.898048 |
| C     | -4.796954 | -2.131612 | -2.316627 |
| H     | -5.432926 | -3.911026 | -1.276387 |
| H     | -4.046921 | -0.250425 | -3.070671 |
| H     | -5.230648 | -2.435126 | -3.265308 |
| C     | 3.138433  | 0.197089  | 0.542915  |
| C     | 3.477778  | 0.152253  | -0.839109 |
| C     | 5.518390  | 1.893532  | 0.977527  |

|   |           |           |           |
|---|-----------|-----------|-----------|
| C | 4.788501  | -0.296177 | -1.419598 |
| C | 6.457906  | 1.100498  | 0.036332  |
| C | 5.898378  | 0.773685  | -1.360233 |
| H | 5.134455  | -1.199332 | -0.902104 |
| H | 6.081932  | 2.710356  | 1.443336  |
| H | 6.781859  | 0.169598  | 0.523496  |
| H | 4.733132  | 2.379230  | 0.384095  |
| H | 4.629986  | -0.582663 | -2.465933 |
| H | 7.373285  | 1.684068  | -0.116742 |
| H | 6.725839  | 0.418886  | -1.987745 |
| H | 5.531342  | 1.698151  | -1.826850 |
| C | 4.065225  | -0.151563 | 1.665946  |
| H | 4.748781  | -0.943734 | 1.341359  |
| H | 3.505084  | -0.546945 | 2.519685  |
| C | 4.871707  | 1.086066  | 2.114682  |
| H | 4.208086  | 1.752399  | 2.679782  |
| H | 5.647776  | 0.750175  | 2.814356  |
| C | 2.371524  | 0.715425  | -1.566524 |
| C | 1.828446  | 0.762341  | 0.658872  |
| C | 1.373604  | 1.148117  | -0.645740 |
| C | 0.100038  | 1.794249  | -0.958852 |
| C | -0.703190 | 2.310320  | 0.068256  |
| C | -0.387972 | 1.870113  | -2.279580 |
| C | -1.965526 | 2.836113  | -0.183685 |
| H | -0.378388 | 2.259943  | 1.099235  |
| C | -1.637735 | 2.402872  | -2.547952 |
| H | 0.205074  | 1.480624  | -3.101862 |
| C | -2.449657 | 2.865308  | -1.495549 |
| H | -2.566358 | 3.143386  | 0.661511  |
| H | -2.028444 | 2.441410  | -3.559490 |
| H | 1.284632  | 0.898748  | 1.584227  |
| H | 2.340295  | 0.837068  | -2.640894 |
| O | -3.691091 | 3.287460  | -1.842614 |
| C | -4.604195 | 3.570167  | -0.784705 |
| H | -4.709477 | 2.707362  | -0.116578 |
| H | -4.281401 | 4.441306  | -0.202067 |
| H | -5.558162 | 3.787283  | -1.266975 |

### **cis-TS2'**

B3LYP-D3 SCF energy (au): -1951.31200115

B3LYP-D3 enthalpy (au): -1950.67568315

B3LYP-D3 free energy (au): -1950.78796215

M06 SCF energy in toluene (au): -1950.52279472

M06 enthalpy in toluene (au): -1949.88647672

M06 free energy in toluene (au): -1949.99875572

M06 free energy in toluene (quasi-harmonic) (au): -1949.99017157

### Cartesian coordinates

| ATOMX | Y         | Z         |          |
|-------|-----------|-----------|----------|
| Fe    | -1.752242 | -0.570184 | 0.800007 |

|   |           |           |           |
|---|-----------|-----------|-----------|
| C | -1.514571 | -2.309820 | 0.499825  |
| O | -1.455077 | -3.432288 | 0.259895  |
| C | -2.010371 | -0.717688 | 2.540491  |
| O | -2.202440 | -0.777050 | 3.674434  |
| C | 0.271648  | -0.113559 | 1.364454  |
| H | 0.569607  | -0.572770 | 2.303705  |
| H | 0.211480  | 0.968976  | 1.411611  |
| C | 0.808200  | -0.685398 | 0.191261  |
| H | 0.677167  | -0.122687 | -0.728794 |
| C | 1.635287  | -1.828639 | 0.092881  |
| H | 1.572587  | -2.351515 | -0.860268 |
| C | 1.847573  | -2.742349 | 1.276752  |
| H | 2.201075  | -2.193301 | 2.156383  |
| H | 0.922024  | -3.263249 | 1.550548  |
| H | 2.589935  | -3.493461 | 1.004567  |
| C | 3.298443  | -1.044128 | -0.324193 |
| O | 4.120700  | -2.066273 | -0.464248 |
| B | 3.952958  | -2.985858 | -1.679302 |
| F | 3.250518  | -2.272277 | -2.663679 |
| F | 5.213316  | -3.348379 | -2.082434 |
| F | 3.188202  | -4.074767 | -1.248603 |
| H | 3.017271  | -0.542840 | -1.254386 |
| C | 3.648991  | -0.108535 | 0.787069  |
| C | 3.173025  | 1.208158  | 0.770708  |
| C | 4.441476  | -0.536190 | 1.857665  |
| C | 3.465243  | 2.079266  | 1.818263  |
| H | 2.572849  | 1.551375  | -0.066586 |
| C | 4.734881  | 0.336304  | 2.906148  |
| H | 4.831035  | -1.547888 | 1.841473  |
| C | 4.244388  | 1.643925  | 2.893302  |
| H | 3.081023  | 3.095959  | 1.796648  |
| H | 5.352218  | -0.003581 | 3.733134  |
| H | 4.473826  | 2.321254  | 3.711396  |
| C | -3.339569 | -0.521808 | -0.619944 |
| C | -3.659272 | 0.300299  | 0.494690  |
| C | -6.518474 | -0.595039 | -1.274779 |
| C | -4.901096 | 0.178344  | 1.321666  |
| C | -6.269348 | 0.852583  | -0.785704 |
| C | -6.050073 | 1.020984  | 0.726493  |
| H | -5.198463 | -0.874704 | 1.369616  |
| H | -6.841350 | -1.226888 | -0.435041 |
| H | -7.128856 | 1.476614  | -1.056633 |
| H | -7.361886 | -0.586354 | -1.974762 |
| H | -4.713131 | 0.497703  | 2.352585  |
| H | -5.414801 | 1.278388  | -1.327455 |
| H | -6.972473 | 0.763829  | 1.262606  |
| H | -5.854722 | 2.081187  | 0.932729  |
| C | -4.141946 | -1.687003 | -1.125682 |
| H | -4.502433 | -2.287802 | -0.282073 |
| H | -3.485336 | -2.339728 | -1.711411 |

|   |           |           |           |
|---|-----------|-----------|-----------|
| C | -5.344257 | -1.276024 | -2.000832 |
| H | -4.992729 | -0.623020 | -2.811254 |
| H | -5.719301 | -2.188036 | -2.481249 |
| C | -2.672492 | 1.342223  | 0.564889  |
| C | -2.151370 | 0.013322  | -1.223334 |
| C | -1.771663 | 1.206553  | -0.534402 |
| C | -0.645262 | 2.082092  | -0.864941 |
| C | 0.053892  | 1.933186  | -2.080100 |
| C | -0.205347 | 3.076120  | 0.021160  |
| C | 1.150922  | 2.722152  | -2.381263 |
| H | -0.264593 | 1.187021  | -2.800747 |
| C | 0.894599  | 3.879650  | -0.267496 |
| H | -0.716328 | 3.221124  | 0.967871  |
| C | 1.590930  | 3.698208  | -1.471266 |
| H | 1.696100  | 2.596389  | -3.310245 |
| H | 1.207800  | 4.628193  | 0.449686  |
| H | -1.659482 | -0.408081 | -2.089175 |
| H | -2.666978 | 2.136324  | 1.298849  |
| O | 2.683784  | 4.402242  | -1.843860 |
| C | 3.264954  | 5.297954  | -0.903809 |
| H | 4.148578  | 5.708285  | -1.393238 |
| H | 2.577103  | 6.114034  | -0.649521 |
| H | 3.564614  | 4.768230  | 0.008579  |

**TS2'-a (1-butene + p-BrPhCHO)**

B3LYP-D3 SCF energy (au): -4522.12472773  
 B3LYP-D3 enthalpy (au): -4521.49727373  
 B3LYP-D3 free energy (au): -4521.61425573  
 M06 SCF energy in toluene (au): -4523.94396709  
 M06 enthalpy in toluene (au): -4523.31651309  
 M06 free energy in toluene (au): -4523.43349509  
 M06 free energy in toluene (quasi-harmonic) (au): -4523.42400736  
 $\omega$ B97X-D SCF energy in toluene (au): -5664.806176  
 $\omega$ B97X-D enthalpy in toluene (au): -5664.178722  
 $\omega$ B97X-D free energy in toluene (au): -5664.295704  
 $\omega$ B97X-D free energy in toluene (quasi-harmonic) (au): -5664.286216  
 DLPNO-CCSD(T) SCF energy in toluene (au): -5659.228999  
 DLPNO-CCSD(T) enthalpy in toluene (au): -5658.601545  
 DLPNO-CCSD(T) free energy in toluene (au): -5658.718527  
 DLPNO-CCSD(T) free energy in toluene (quasi-harmonic) (au): -5658.709039

Cartesian coordinates

| ATOMX | Y        | Z        |           |
|-------|----------|----------|-----------|
| Fe    | 2.509868 | 0.230729 | 0.801364  |
| C     | 2.902699 | 1.887822 | 0.280770  |
| O     | 3.203860 | 2.930435 | -0.094296 |
| C     | 3.093331 | 0.427949 | 2.456985  |
| O     | 3.477944 | 0.509331 | 3.539362  |
| C     | 0.614441 | 0.818954 | 1.618077  |
| H     | 0.751996 | 1.701083 | 2.243430  |



|   |           |           |           |
|---|-----------|-----------|-----------|
| H | 0.281025  | -0.064184 | 2.159830  |
| C | 0.037811  | 1.043559  | 0.344518  |
| H | -0.368409 | 0.173174  | -0.164515 |
| C | -0.169275 | 2.287802  | -0.273776 |
| H | 0.345917  | 3.135585  | 0.171807  |
| C | -0.290233 | 2.357540  | -1.777322 |
| H | -0.737408 | 3.311364  | -2.063724 |
| H | -0.897579 | 1.534405  | -2.172583 |
| C | -1.914542 | 2.795480  | 0.434402  |
| O | -2.152678 | 3.954659  | -0.124981 |
| B | -1.297591 | 5.175765  | 0.289624  |
| F | -2.150873 | 6.245362  | 0.352938  |
| F | -0.703457 | 4.873344  | 1.521967  |
| F | -0.322325 | 5.308700  | -0.697315 |
| H | -1.614817 | 2.817007  | 1.484755  |
| C | -2.858846 | 1.703929  | 0.064553  |
| C | -3.045282 | 0.609054  | 0.917659  |
| C | -3.551542 | 1.746420  | -1.150781 |
| C | -3.880612 | -0.443826 | 0.555707  |
| H | -2.527020 | 0.576689  | 1.872401  |
| C | -4.381379 | 0.693339  | -1.532694 |
| H | -3.433589 | 2.615537  | -1.787882 |
| C | -4.527247 | -0.397820 | -0.678629 |
| H | -4.027222 | -1.292730 | 1.210659  |
| H | -4.909191 | 0.718700  | -2.479375 |
| C | 3.468759  | -0.528672 | -0.946749 |
| C | 3.982601  | -1.174923 | 0.214590  |
| C | 5.395089  | -2.086288 | -2.561231 |
| C | 5.419525  | -1.211277 | 0.650909  |
| C | 6.583110  | -1.941081 | -1.579125 |
| C | 6.280145  | -2.247671 | -0.101196 |
| H | 5.868765  | -0.218025 | 0.529955  |
| H | 5.724276  | -2.646615 | -3.443949 |
| H | 7.017882  | -0.934540 | -1.658837 |
| H | 4.612359  | -2.701000 | -2.098067 |
| H | 5.454171  | -1.435045 | 1.723576  |
| H | 7.378704  | -2.628221 | -1.889470 |
| H | 7.233660  | -2.327421 | 0.435683  |
| H | 5.801249  | -3.233784 | -0.027990 |
| C | 4.296843  | 0.194887  | -1.963017 |
| H | 5.159316  | 0.654137  | -1.468402 |
| H | 3.724507  | 1.010088  | -2.418173 |
| C | 4.779541  | -0.771294 | -3.066324 |
| H | 3.931838  | -1.012626 | -3.720195 |
| H | 5.510269  | -0.237516 | -3.686891 |
| C | 2.886509  | -1.873653 | 0.829989  |
| C | 2.068960  | -0.806162 | -1.024243 |
| C | 1.708962  | -1.680249 | 0.055585  |
| C | 0.384465  | -2.248058 | 0.321161  |
| C | -0.570471 | -2.362386 | -0.708152 |

|    |           |           |           |
|----|-----------|-----------|-----------|
| C  | 0.026653  | -2.690880 | 1.601408  |
| C  | -1.826621 | -2.892350 | -0.466063 |
| H  | -0.319595 | -2.037756 | -1.713354 |
| C  | -1.232148 | -3.227769 | 1.861067  |
| H  | 0.734562  | -2.599176 | 2.419969  |
| C  | -2.167712 | -3.330228 | 0.823415  |
| H  | -2.572791 | -2.965865 | -1.249302 |
| H  | -1.475037 | -3.551128 | 2.865878  |
| H  | 1.407442  | -0.440332 | -1.796706 |
| H  | 2.962960  | -2.483338 | 1.720475  |
| O  | -3.426303 | -3.814181 | 0.967319  |
| C  | -3.845007 | -4.245052 | 2.254803  |
| H  | -3.803940 | -3.424989 | 2.983072  |
| H  | -4.878303 | -4.571715 | 2.135278  |
| H  | -3.233324 | -5.081889 | 2.614453  |
| Br | -5.623398 | -1.870660 | -1.211660 |
| H  | 0.703797  | 2.304273  | -2.242608 |

### TS2-a (1-butene + p-BrPhCHO)

B3LYP-D3 SCF energy (au): -4522.13233396  
 B3LYP-D3 enthalpy (au): -4521.50508196  
 B3LYP-D3 free energy (au): -4521.62197196  
 M06 SCF energy in toluene (au): -4523.94434550  
 M06 enthalpy in toluene (au): -4523.31709350  
 M06 free energy in toluene (au): -4523.43398350  
 M06 free energy in toluene (quasi-harmonic) (au): -4523.42452454  
 $\omega$ B97X-D SCF energy in toluene (au): -5664.806502  
 $\omega$ B97X-D enthalpy in toluene (au): -5664.17925  
 $\omega$ B97X-D free energy in toluene (au): -5664.29614  
 $\omega$ B97X-D free energy in toluene (quasi-harmonic) (au): -5664.286681  
 DLPNO-CCSD(T) SCF energy in toluene (au): -5659.229981  
 DLPNO-CCSD(T) enthalpy in toluene (au): -5658.602729  
 DLPNO-CCSD(T) free energy in toluene (au): -5658.719619  
 DLPNO-CCSD(T) free energy in toluene (quasi-harmonic) (au): -5658.71016

### Cartesian coordinates

| ATOMX | Y         | Z        |           |
|-------|-----------|----------|-----------|
| Fe    | 2.419798  | 0.353674 | 0.465071  |
| C     | 2.889229  | 1.811495 | -0.437453 |
| O     | 3.242363  | 2.709314 | -1.061751 |
| C     | 2.841242  | 1.009278 | 2.053854  |
| O     | 3.123741  | 1.383857 | 3.104165  |
| C     | 0.468061  | 1.097423 | 0.922210  |
| H     | 0.560935  | 2.080007 | 1.373046  |
| H     | 0.054861  | 0.325102 | 1.566679  |
| C     | 0.026680  | 1.085983 | -0.422274 |
| H     | -0.380578 | 0.149379 | -0.798892 |
| C     | -0.088373 | 2.200702 | -1.268629 |
| H     | 0.466836  | 3.090780 | -0.989794 |
| C     | -0.273381 | 1.993782 | -2.751899 |

|   |           |           |           |
|---|-----------|-----------|-----------|
| H | -0.907084 | 1.124013  | -2.961681 |
| H | 0.693726  | 1.833537  | -3.248853 |
| C | -1.790058 | 2.950117  | -0.474226 |
| O | -1.494757 | 3.392299  | 0.717415  |
| B | -0.573907 | 4.621311  | 0.864318  |
| F | -0.622325 | 5.333639  | -0.329965 |
| F | -1.028031 | 5.321650  | 1.947768  |
| F | 0.729814  | 4.117997  | 1.067164  |
| H | -1.825561 | 3.690201  | -1.277618 |
| C | -2.802515 | 1.867048  | -0.546939 |
| C | -3.448914 | 1.582458  | -1.756356 |
| C | -3.110414 | 1.101871  | 0.586499  |
| C | -4.365457 | 0.537100  | -1.848729 |
| H | -3.240242 | 2.188024  | -2.633393 |
| C | -4.025922 | 0.056387  | 0.507894  |
| H | -2.627445 | 1.344658  | 1.526079  |
| C | -4.641722 | -0.221396 | -0.712860 |
| H | -4.868184 | 0.320508  | -2.784389 |
| H | -4.267773 | -0.534325 | 1.382857  |
| C | 3.525864  | -0.868931 | -0.895778 |
| C | 3.881697  | -1.172777 | 0.449535  |
| C | 6.342888  | -2.216959 | -1.780679 |
| C | 5.276398  | -1.160509 | 0.993155  |
| C | 5.843746  | -3.116034 | -0.623193 |
| C | 5.973025  | -2.523123 | 0.789231  |
| H | 5.848697  | -0.372165 | 0.492177  |
| H | 7.019225  | -1.442285 | -1.392176 |
| H | 6.406279  | -4.056940 | -0.630637 |
| H | 6.953726  | -2.825649 | -2.457483 |
| H | 5.271450  | -0.910218 | 2.059913  |
| H | 4.798205  | -3.396538 | -0.804943 |
| H | 7.034455  | -2.406318 | 1.043211  |
| H | 5.558530  | -3.243789 | 1.506055  |
| C | 4.460913  | -0.406501 | -1.977212 |
| H | 5.168410  | 0.328196  | -1.575102 |
| H | 3.878964  | 0.114189  | -2.746177 |
| C | 5.252141  | -1.552856 | -2.640373 |
| H | 4.548562  | -2.321443 | -2.988573 |
| H | 5.727033  | -1.139394 | -3.538823 |
| C | 2.700597  | -1.666716 | 1.103234  |
| C | 2.129703  | -1.135970 | -1.049803 |
| C | 1.620295  | -1.677490 | 0.178062  |
| C | 0.248733  | -2.121572 | 0.442053  |
| C | -0.637051 | -2.411799 | -0.613732 |
| C | -0.230312 | -2.254250 | 1.752502  |
| C | -1.941144 | -2.809464 | -0.369326 |
| H | -0.294388 | -2.331697 | -1.640953 |
| C | -1.536573 | -2.657671 | 2.015574  |
| H | 0.419378  | -2.017587 | 2.589615  |
| C | -2.401980 | -2.938095 | 0.950356  |

|    |           |           |           |
|----|-----------|-----------|-----------|
| H  | -2.631409 | -3.020151 | -1.178627 |
| H  | -1.870221 | -2.741542 | 3.042652  |
| H  | 1.569280  | -0.986099 | -1.961720 |
| H  | 2.658962  | -2.008305 | 2.128675  |
| O  | -3.690288 | -3.332671 | 1.089327  |
| C  | -4.241028 | -3.412477 | 2.394915  |
| H  | -5.286596 | -3.689077 | 2.257606  |
| H  | -3.732184 | -4.174811 | 2.998319  |
| H  | -4.186399 | -2.445722 | 2.911702  |
| Br | -5.905028 | -1.648393 | -0.835236 |
| H  | -0.730490 | 2.870852  | -3.224551 |

### 43-a (Fp\* instead of Fp<sup>W3</sup>)

B3LYP-D3 SCF energy (au): -897.431825206  
 B3LYP-D3 enthalpy (au): -897.066289206  
 B3LYP-D3 free energy (au): -897.143255206  
 M06 SCF energy in toluene (au): -897.012148836  
 M06 enthalpy in toluene (au): -896.646612836  
 M06 free energy in toluene (au): -896.723578836  
 M06 free energy in toluene (quasi-harmonic) (au): -896.720310630  
 M06 SCF energy in dichloromethane (au): -897.014288  
 M06 enthalpy in dichloromethane (au): -896.648752  
 M06 free energy in dichloromethane (au): -896.725718  
 M06 free energy in dichloromethane (quasi-harmonic) (au): -896.7224498

### Cartesian coordinates

| ATOMX | Y         | Z         |           |
|-------|-----------|-----------|-----------|
| C     | -1.859934 | -0.930432 | -0.673316 |
| C     | -2.139284 | 0.456685  | -0.550967 |
| C     | -1.801249 | 0.863491  | 0.794265  |
| C     | -1.354952 | -0.293274 | 1.499575  |
| C     | -1.346580 | -1.396432 | 0.595172  |
| Fe    | -0.062009 | 0.113311  | -0.187748 |
| C     | 0.435601  | 1.626446  | -0.923487 |
| O     | 0.700160  | 2.647981  | -1.399331 |
| C     | 0.958619  | -0.954316 | -1.141309 |
| O     | 1.585744  | -1.705046 | -1.756718 |
| C     | -0.979882 | -2.810709 | 0.933920  |
| H     | -0.637543 | -3.358449 | 0.051216  |
| H     | -0.175564 | -2.845553 | 1.674860  |
| H     | -1.837487 | -3.356073 | 1.349985  |
| C     | -2.109232 | -1.783952 | -1.881772 |
| H     | -2.050599 | -1.199111 | -2.803909 |
| H     | -1.381667 | -2.596800 | -1.959272 |
| H     | -3.107843 | -2.238167 | -1.837596 |
| C     | -2.737926 | 1.339160  | -1.606289 |
| H     | -3.831969 | 1.364268  | -1.517483 |
| H     | -2.377879 | 2.368611  | -1.524185 |
| H     | -2.494062 | 0.983083  | -2.611036 |
| C     | -1.996009 | 2.231226  | 1.378116  |

|   |           |           |           |
|---|-----------|-----------|-----------|
| H | -2.983919 | 2.326782  | 1.848214  |
| H | -1.244437 | 2.447267  | 2.143390  |
| H | -1.918860 | 3.008620  | 0.612533  |
| C | -1.010017 | -0.351949 | 2.954743  |
| H | -0.267130 | -1.125471 | 3.165472  |
| H | -0.612077 | 0.599503  | 3.317012  |
| H | -1.905987 | -0.582689 | 3.545469  |
| C | 3.841518  | -0.245227 | 0.469270  |
| H | 3.713776  | -1.275662 | 0.808276  |
| C | 2.819277  | 0.609541  | 0.616675  |
| H | 2.958519  | 1.635100  | 0.265061  |
| C | 1.485353  | 0.282279  | 1.173281  |
| H | 1.146756  | 1.066227  | 1.859284  |
| H | 1.513162  | -0.672986 | 1.707989  |
| C | 5.168792  | 0.094399  | -0.144237 |
| H | 5.208467  | 1.146902  | -0.446989 |
| H | 5.998044  | -0.087621 | 0.553891  |
| H | 5.368715  | -0.518978 | -1.034176 |

#### 41-a (Fp\* instead of Fp<sup>W3</sup>)

B3LYP-D3 SCF energy (au): -897.847690040  
 B3LYP-D3 enthalpy (au): -897.468288040  
 B3LYP-D3 free energy (au): -897.544061040  
 M06 SCF energy in toluene (au): -897.457326206  
 M06 enthalpy in toluene (au): -897.077924206  
 M06 free energy in toluene (au): -897.153697206  
 M06 free energy in toluene (quasi-harmonic) (au): -897.151066166  
 M06 SCF energy in dichloromethane (au): -897.479032  
 M06 enthalpy in dichloromethane (au): -897.09963  
 M06 free energy in dichloromethane (au): -897.175403  
 M06 free energy in dichloromethane (quasi-harmonic) (au): -897.172772

#### Cartesian coordinates

| ATOMX | Y         | Z         |           |
|-------|-----------|-----------|-----------|
| C     | 0.738646  | 1.013610  | 1.357365  |
| C     | 1.654460  | 1.144861  | 0.243067  |
| C     | 2.125053  | -0.160070 | -0.095247 |
| C     | 1.487891  | -1.107241 | 0.781341  |
| C     | 0.671777  | -0.369051 | 1.698700  |
| Fe    | 0.003761  | -0.048984 | -0.351255 |
| C     | 0.239968  | -0.854624 | -1.930611 |
| O     | 0.443687  | -1.375231 | -2.930918 |
| C     | -0.747016 | 1.424809  | -1.028799 |
| O     | -1.148925 | 2.417132  | -1.438333 |
| C     | -0.061942 | -0.955414 | 2.864133  |
| H     | -0.592983 | -1.877407 | 2.609357  |
| H     | 0.658445  | -1.211578 | 3.650632  |
| H     | -0.776987 | -0.252340 | 3.296219  |
| C     | 0.093195  | 2.146217  | 2.097021  |
| H     | 0.741440  | 2.481425  | 2.915816  |

|   |           |           |           |
|---|-----------|-----------|-----------|
| H | -0.084761 | 3.006062  | 1.446532  |
| H | -0.864836 | 1.853106  | 2.534200  |
| C | 2.140427  | 2.430438  | -0.354694 |
| H | 2.386785  | 2.317607  | -1.413531 |
| H | 1.405145  | 3.232645  | -0.261009 |
| H | 3.050563  | 2.755405  | 0.164297  |
| C | 3.179003  | -0.473690 | -1.112905 |
| H | 4.167913  | -0.390301 | -0.645479 |
| H | 3.085010  | -1.489495 | -1.503459 |
| H | 3.154032  | 0.221650  | -1.955554 |
| C | 1.767812  | -2.577738 | 0.836205  |
| H | 0.933887  | -3.135692 | 1.270344  |
| H | 1.972342  | -2.991220 | -0.154858 |
| H | 2.647160  | -2.771942 | 1.462837  |
| C | -1.537133 | -1.617868 | -0.165765 |
| H | -1.838344 | -2.022432 | -1.128645 |
| H | -1.038708 | -2.318209 | 0.492713  |
| C | -2.152222 | -0.478216 | 0.309231  |
| H | -2.063329 | -0.243076 | 1.366328  |
| C | -3.298739 | 0.194090  | -0.405244 |
| H | -3.301694 | 1.271073  | -0.208360 |
| H | -3.203342 | 0.057127  | -1.488936 |
| C | -4.631565 | -0.408008 | 0.079469  |
| H | -4.755141 | -0.281720 | 1.160600  |
| H | -5.469183 | 0.092365  | -0.415225 |
| H | -4.686994 | -1.477304 | -0.147784 |

### TS2'-b (1-octene + p-BrPhCHO)

B3LYP-D3 SCF energy (au): -4679.40210017  
 B3LYP-D3 enthalpy (au): -4678.65434517  
 B3LYP-D3 free energy (au): -4678.78343517  
 M06 SCF energy in toluene (au): -4681.11224938  
 M06 enthalpy in toluene (au): -4680.36449438  
 M06 free energy in toluene (au): -4680.49358438  
 M06 free energy in toluene (quasi-harmonic) (au): -4680.48227921  
 $\omega$ B97X-D SCF energy in toluene (au): -5822.081381  
 $\omega$ B97X-D enthalpy in toluene (au): -5821.333626  
 $\omega$ B97X-D free energy in toluene (au): -5821.462716  
 $\omega$ B97X-D free energy in toluene (quasi-harmonic) (au): -5821.451411  
 DLPNO-CCSD(T) SCF energy in toluene (au): -5816.17264  
 DLPNO-CCSD(T) enthalpy in toluene (au): -5815.424885  
 DLPNO-CCSD(T) free energy in toluene (au): -5815.553975  
 DLPNO-CCSD(T) free energy in toluene (quasi-harmonic) (au): -5815.54267

### Cartesian coordinates

| ATOMX | Y         | Z         |           |
|-------|-----------|-----------|-----------|
| Fe    | -2.251594 | -0.606096 | -1.291065 |
| C     | -2.863089 | 1.065056  | -1.364478 |
| O     | -3.310521 | 2.121975  | -1.397344 |
| C     | -2.648806 | -0.988922 | -2.968329 |

|   |           |           |           |
|---|-----------|-----------|-----------|
| O | -2.907655 | -1.285129 | -4.050869 |
| C | -0.342830 | -0.035406 | -2.082499 |
| H | -0.497480 | 0.629359  | -2.932567 |
| H | 0.119542  | -0.986624 | -2.340725 |
| C | 0.103069  | 0.577770  | -0.885973 |
| H | 0.540487  | -0.081546 | -0.140876 |
| C | 0.154425  | 1.953732  | -0.611391 |
| H | -0.411807 | 2.594261  | -1.283671 |
| C | 0.174824  | 2.424139  | 0.827001  |
| H | 0.780514  | 3.332627  | 0.890936  |
| H | 0.646260  | 1.661147  | 1.463459  |
| C | 1.870578  | 2.461968  | -1.373748 |
| O | 1.953456  | 3.744777  | -1.122762 |
| B | 0.962214  | 4.713389  | -1.805443 |
| F | 1.668535  | 5.845134  | -2.112215 |
| F | 0.446082  | 4.062402  | -2.933386 |
| F | -0.054394 | 4.941159  | -0.873542 |
| H | 1.628827  | 2.182727  | -2.402093 |
| C | 2.899801  | 1.617054  | -0.705137 |
| C | 3.230248  | 0.357807  | -1.221897 |
| C | 3.524667  | 2.057147  | 0.467012  |
| C | 4.140501  | -0.466236 | -0.566769 |
| H | 2.764890  | 0.014891  | -2.142136 |
| C | 4.430560  | 1.238575  | 1.139632  |
| H | 3.294410  | 3.047980  | 0.841083  |
| C | 4.720659  | -0.021522 | 0.620812  |
| H | 4.396541  | -1.440503 | -0.962255 |
| H | 4.907213  | 1.573945  | 2.053804  |
| C | -3.318728 | -0.926802 | 0.530315  |
| C | -3.650715 | -1.937476 | -0.418564 |
| C | -5.249323 | -2.153652 | 2.402416  |
| C | -5.026979 | -2.267014 | -0.921588 |
| C | -6.338008 | -2.447301 | 1.341214  |
| C | -5.858731 | -3.132497 | 0.048239  |
| H | -5.575363 | -1.341879 | -1.136620 |
| H | -5.615129 | -2.463514 | 3.388182  |
| H | -6.873576 | -1.522259 | 1.084367  |
| H | -4.369613 | -2.780001 | 2.204931  |
| H | -4.933623 | -2.797451 | -1.876531 |
| H | -7.091486 | -3.106290 | 1.787950  |
| H | -6.741530 | -3.479376 | -0.503337 |
| H | -5.284488 | -4.032284 | 0.308674  |
| C | -4.313600 | -0.039999 | 1.213515  |
| H | -5.159743 | 0.138692  | 0.541587  |
| H | -3.875903 | 0.937877  | 1.435384  |
| C | -4.813495 | -0.684423 | 2.523357  |
| H | -4.017885 | -0.616355 | 3.276360  |
| H | -5.650211 | -0.081791 | 2.898584  |
| C | -2.440934 | -2.656239 | -0.712998 |
| C | -1.916401 | -1.010626 | 0.791413  |

|    |           |           |           |
|----|-----------|-----------|-----------|
| C  | -1.371162 | -2.112651 | 0.050539  |
| C  | 0.019379  | -2.576002 | 0.060015  |
| C  | 0.872141  | -2.278228 | 1.141141  |
| C  | 0.544686  | -3.318861 | -1.005386 |
| C  | 2.190611  | -2.701450 | 1.152763  |
| H  | 0.491969  | -1.711510 | 1.985665  |
| C  | 1.867588  | -3.755227 | -1.007202 |
| H  | -0.082121 | -3.547614 | -1.862357 |
| C  | 2.699126  | -3.446933 | 0.077212  |
| H  | 2.857531  | -2.459737 | 1.972816  |
| H  | 2.239502  | -4.321203 | -1.852572 |
| H  | -1.372266 | -0.366665 | 1.466697  |
| H  | -2.371129 | -3.502442 | -1.383590 |
| O  | 4.003069  | -3.804681 | 0.172957  |
| C  | 4.593368  | -4.518460 | -0.903633 |
| H  | 4.547892  | -3.942726 | -1.837066 |
| H  | 5.635847  | -4.668300 | -0.621835 |
| H  | 4.107802  | -5.491043 | -1.052767 |
| C  | -1.233291 | 2.750881  | 1.340525  |
| H  | -1.888225 | 1.878842  | 1.207954  |
| H  | -1.643451 | 3.552186  | 0.715069  |
| C  | -1.256868 | 3.172679  | 2.810978  |
| H  | -0.787619 | 2.390162  | 3.427560  |
| H  | -0.639775 | 4.072697  | 2.938362  |
| C  | -2.671134 | 3.444880  | 3.333687  |
| H  | -3.143250 | 4.214971  | 2.708802  |
| H  | -3.282001 | 2.537060  | 3.212852  |
| C  | -2.696666 | 3.882817  | 4.800080  |
| H  | -3.719408 | 4.066767  | 5.148152  |
| H  | -2.254306 | 3.116496  | 5.448822  |
| H  | -2.123635 | 4.806667  | 4.942625  |
| Br | 5.930701  | -1.166912 | 1.557085  |

**TS2-b (1-octene + p-BrPhCHO)**

B3LYP-D3 SCF energy (au): -4679.40823381  
 B3LYP-D3 enthalpy (au): -4678.66067781  
 B3LYP-D3 free energy (au): -4678.78953781  
 M06 SCF energy in toluene (au): -4681.11260254  
 M06 enthalpy in toluene (au): -4680.36504654  
 M06 free energy in toluene (au): -4680.49390654  
 M06 free energy in toluene (quasi-harmonic) (au): -4680.48275373  
 $\omega$ B97X-D SCF energy in toluene (au): -5822.081808  
 $\omega$ B97X-D enthalpy in toluene (au): -5821.334252  
 $\omega$ B97X-D free energy in toluene (au): -5821.463112  
 $\omega$ B97X-D free energy in toluene (quasi-harmonic) (au): -5821.451959  
 DLPNO-CCSD(T) SCF energy in toluene (au): -5816.17351  
 DLPNO-CCSD(T) enthalpy in toluene (au): -5815.425954  
 DLPNO-CCSD(T) free energy in toluene (au): -5815.554814  
 DLPNO-CCSD(T) free energy in toluene (quasi-harmonic) (au): -5815.543661



Cartesian coordinates

| ATOMX | Y         | Z         |           |
|-------|-----------|-----------|-----------|
| Fe    | -2.146591 | -0.292257 | -1.150947 |
| C     | -2.802718 | 1.346814  | -0.943748 |
| O     | -3.287149 | 2.376143  | -0.781434 |
| C     | -2.381106 | -0.315761 | -2.903903 |
| O     | -2.536340 | -0.385925 | -4.041657 |
| C     | -0.187839 | 0.403981  | -1.654892 |
| H     | -0.267639 | 1.146267  | -2.442418 |
| H     | 0.332409  | -0.511496 | -1.926572 |
| C     | 0.091171  | 0.917359  | -0.366439 |
| H     | 0.489162  | 0.217103  | 0.366458  |
| C     | 0.066842  | 2.269822  | 0.013956  |
| H     | -0.490448 | 2.950066  | -0.623645 |
| C     | 0.073446  | 2.626064  | 1.482700  |
| H     | 0.479560  | 3.637656  | 1.620899  |
| H     | 0.739634  | 1.942835  | 2.028095  |
| C     | 1.816666  | 2.810896  | -0.832252 |
| O     | 1.645859  | 2.772523  | -2.125773 |
| B     | 0.698948  | 3.788258  | -2.795979 |
| F     | 0.570841  | 4.879181  | -1.941056 |
| F     | 1.250609  | 4.095869  | -4.009206 |
| F     | -0.547970 | 3.139104  | -2.930182 |
| H     | 1.735384  | 3.790808  | -0.355452 |
| C     | 2.849263  | 1.901927  | -0.273871 |
| C     | 3.354539  | 2.111831  | 1.015321  |
| C     | 3.308790  | 0.805126  | -1.015867 |
| C     | 4.274443  | 1.227801  | 1.575242  |
| H     | 3.027971  | 2.975493  | 1.587026  |
| C     | 4.229345  | -0.084239 | -0.468956 |
| H     | 2.935005  | 0.664543  | -2.023595 |
| C     | 4.697279  | 0.130471  | 0.827666  |
| H     | 4.664948  | 1.390855  | 2.573266  |
| H     | 4.583705  | -0.935258 | -1.037235 |
| C     | -3.324444 | -1.007351 | 0.488847  |
| C     | -3.558798 | -1.791754 | -0.678495 |
| C     | -6.162198 | -2.105232 | 1.618262  |
| C     | -4.904675 | -2.056006 | -1.278029 |
| C     | -5.543341 | -3.328600 | 0.898610  |
| C     | -5.575703 | -3.290527 | -0.638029 |
| H     | -5.538392 | -1.173751 | -1.136368 |
| H     | -6.828875 | -1.562108 | 0.933350  |
| H     | -6.075556 | -4.235243 | 1.209399  |
| H     | -6.806100 | -2.465496 | 2.429019  |
| H     | -4.820980 | -2.207227 | -2.360099 |
| H     | -4.507969 | -3.464517 | 1.236912  |
| H     | -6.616329 | -3.332837 | -0.984675 |
| H     | -5.084326 | -4.196392 | -1.016239 |
| C     | -4.359148 | -0.240921 | 1.263365  |
| H     | -5.054302 | 0.254013  | 0.574986  |

|    |           |           |           |
|----|-----------|-----------|-----------|
| H  | -3.860941 | 0.556815  | 1.824768  |
| C  | -5.165413 | -1.114140 | 2.246172  |
| H  | -4.469054 | -1.663301 | 2.894705  |
| H  | -5.723397 | -0.432294 | 2.900019  |
| C  | -2.313956 | -2.418900 | -1.028166 |
| C  | -1.940671 | -1.122592 | 0.821050  |
| C  | -1.312143 | -2.030506 | -0.096382 |
| C  | 0.094453  | -2.443467 | -0.097192 |
| C  | 0.906145  | -2.264626 | 1.039619  |
| C  | 0.682784  | -3.004873 | -1.238626 |
| C  | 2.244185  | -2.623620 | 1.031895  |
| H  | 0.479640  | -1.844125 | 1.945350  |
| C  | 2.024623  | -3.375272 | -1.261825 |
| H  | 0.091836  | -3.135088 | -2.140149 |
| C  | 2.815172  | -3.183759 | -0.121392 |
| H  | 2.878019  | -2.471900 | 1.898478  |
| H  | 2.443343  | -3.797982 | -2.166924 |
| H  | -1.462631 | -0.631213 | 1.655441  |
| H  | -2.176530 | -3.098521 | -1.858474 |
| O  | 4.131285  | -3.496655 | -0.036751 |
| C  | 4.785702  | -3.999908 | -1.191509 |
| H  | 5.829444  | -4.131985 | -0.905198 |
| H  | 4.363636  | -4.963589 | -1.503515 |
| H  | 4.724475  | -3.290223 | -2.026663 |
| Br | 5.949301  | -1.090055 | 1.596749  |
| C  | -1.331216 | 2.569044  | 2.105287  |
| H  | -1.749640 | 1.567347  | 1.939561  |
| H  | -1.992724 | 3.262731  | 1.570477  |
| C  | -1.355698 | 2.881180  | 3.602924  |
| H  | -0.666295 | 2.204386  | 4.129734  |
| H  | -0.973208 | 3.897839  | 3.772010  |
| C  | -2.755017 | 2.754732  | 4.214905  |
| H  | -3.130993 | 1.734628  | 4.044699  |
| H  | -3.443211 | 3.425595  | 3.682337  |
| C  | -2.787542 | 3.066988  | 5.712961  |
| H  | -3.798605 | 2.965728  | 6.122938  |
| H  | -2.129951 | 2.389639  | 6.271484  |
| H  | -2.448873 | 4.091574  | 5.907790  |

### PhCHO-BF3 (46)

B3LYP-D3 SCF energy (au): -670.167169539

B3LYP-D3 enthalpy (au): -670.030215539

B3LYP-D3 free energy (au): -670.079772539

M06 SCF energy in toluene (au): -669.997014046

M06 enthalpy in toluene (au): -669.860060046

M06 free energy in toluene (au): -669.909617046

M06 free energy in toluene (quasi-harmonic) (au): -669.911057507

Cartesian coordinates

ATOMX        Y        Z

|   |           |           |           |
|---|-----------|-----------|-----------|
| C | 3.917640  | 0.274599  | -0.000008 |
| C | 3.025830  | 1.355258  | 0.000019  |
| C | 1.657278  | 1.123876  | 0.000032  |
| C | 1.176910  | -0.199292 | 0.000021  |
| C | 2.075549  | -1.279644 | -0.000011 |
| C | 3.446160  | -1.040966 | -0.000023 |
| H | 4.987566  | 0.461667  | -0.000020 |
| H | 3.405694  | 2.372003  | 0.000030  |
| H | 0.944305  | 1.941383  | 0.000050  |
| H | 1.692375  | -2.296604 | -0.000024 |
| H | 4.144929  | -1.871299 | -0.000046 |
| C | -0.244936 | -0.476283 | 0.000034  |
| H | -0.579503 | -1.520101 | 0.000101  |
| O | -1.102888 | 0.420756  | -0.000010 |
| B | -2.768294 | 0.030691  | -0.000011 |
| F | -3.186322 | 0.606154  | 1.152148  |
| F | -3.186132 | 0.605783  | -1.152427 |
| F | -2.767255 | -1.339920 | 0.000241  |

### PhCHO

B3LYP-D3 SCF energy (au): -345.590832665  
 B3LYP-D3 enthalpy (au): -345.473262665  
 B3LYP-D3 free energy (au): -345.510999665  
 M06 SCF energy in toluene (au): -345.422011338  
 M06 enthalpy in toluene (au): -345.304441338  
 M06 free energy in toluene (au): -345.342178338  
 M06 free energy in toluene (quasi-harmonic) (au): -345.344749673

### Cartesian coordinates

| ATOMX | Y         | Z         |           |
|-------|-----------|-----------|-----------|
| C     | 2.214948  | -0.251977 | -0.000001 |
| C     | 1.323746  | -1.331755 | -0.000001 |
| C     | -0.047122 | -1.100459 | 0.000002  |
| C     | -0.533240 | 0.215416  | 0.000003  |
| C     | 0.361355  | 1.292489  | -0.000000 |
| C     | 1.735649  | 1.059823  | -0.000001 |
| H     | 3.285754  | -0.435585 | -0.000000 |
| H     | 1.704679  | -2.348888 | -0.000003 |
| H     | -0.762973 | -1.916276 | 0.000002  |
| H     | -0.025013 | 2.309325  | -0.000005 |
| H     | 2.430770  | 1.894177  | 0.000001  |
| C     | -1.989924 | 0.469552  | 0.000004  |
| H     | -2.271086 | 1.546507  | -0.000004 |
| O     | -2.844326 | -0.395974 | -0.000003 |

### 45'-a (Alkoxytrifluoroborate after dissociation from 45')

B3LYP-D3 SCF energy (au): -826.889875291  
 B3LYP-D3 enthalpy (au): -826.647646291  
 B3LYP-D3 free energy (au): -826.707409291  
 M06 SCF energy in toluene (au): -826.675389221

M06 enthalpy in toluene (au): -826.433160221  
M06 free energy in toluene (au): -826.492923221  
M06 free energy in toluene (quasi-harmonic) (au): -826.495792930

Cartesian coordinates

| ATOMX | Y         | Z         |           |
|-------|-----------|-----------|-----------|
| C     | -3.064991 | 1.704184  | 0.173482  |
| H     | -2.980105 | 0.699431  | 0.575880  |
| H     | -4.042100 | 2.184238  | 0.223695  |
| C     | -2.042010 | 2.338001  | -0.401444 |
| H     | -2.211377 | 3.337731  | -0.814721 |
| C     | -0.608642 | 1.868496  | -0.531406 |
| H     | -0.383854 | 1.769026  | -1.605841 |
| C     | 0.315216  | 2.960774  | 0.039489  |
| H     | 0.073739  | 3.938144  | -0.398295 |
| H     | 0.187032  | 3.046626  | 1.126084  |
| H     | 1.368737  | 2.746790  | -0.159988 |
| C     | -0.360631 | 0.463028  | 0.079489  |
| O     | -1.106139 | -0.457919 | -0.651949 |
| B     | -1.535824 | -1.660772 | 0.080436  |
| F     | -2.409328 | -1.278726 | 1.142890  |
| F     | -2.208246 | -2.487394 | -0.820018 |
| F     | -0.428571 | -2.323630 | 0.645522  |
| H     | -0.684882 | 0.497159  | 1.133381  |
| C     | 1.126425  | 0.116676  | 0.061370  |
| C     | 1.683877  | -0.466356 | -1.081561 |
| C     | 1.965539  | 0.397818  | 1.143437  |
| C     | 3.048980  | -0.738649 | -1.149933 |
| H     | 1.012866  | -0.728084 | -1.892957 |
| C     | 3.333640  | 0.124273  | 1.083583  |
| H     | 1.537724  | 0.828527  | 2.046309  |
| C     | 3.883303  | -0.440357 | -0.068487 |
| H     | 3.465127  | -1.196499 | -2.045273 |
| H     | 3.968520  | 0.344031  | 1.939815  |
| H     | 4.947863  | -0.659480 | -0.118347 |

**45'-b (product alcohol from 45'-a)**

B3LYP-D3 SCF energy (au): -502.830082498  
B3LYP-D3 enthalpy (au): -502.593318498  
B3LYP-D3 free energy (au): -502.643731498  
M06 SCF energy in toluene (au): -502.563043803  
M06 enthalpy in toluene (au): -502.326279803  
M06 free energy in toluene (au): -502.376692803  
M06 free energy in toluene (quasi-harmonic) (au): -502.380765305

Cartesian coordinates

| ATOMX | Y        | Z         |           |
|-------|----------|-----------|-----------|
| C     | 3.725890 | -0.131589 | -0.592360 |
| H     | 3.244761 | -0.272794 | -1.557272 |
| H     | 4.809154 | -0.211401 | -0.582152 |

|   |           |           |           |
|---|-----------|-----------|-----------|
| C | 3.041297  | 0.138959  | 0.522955  |
| H | 3.599672  | 0.282111  | 1.448962  |
| C | 1.544142  | 0.328322  | 0.655011  |
| H | 1.228001  | -0.154798 | 1.590622  |
| C | 1.232142  | 1.831442  | 0.766986  |
| H | 1.835004  | 2.293791  | 1.556080  |
| H | 1.468049  | 2.342780  | -0.173505 |
| H | 0.176637  | 1.998771  | 0.997459  |
| C | 0.748290  | -0.362435 | -0.478943 |
| O | 1.041230  | -1.755462 | -0.519604 |
| H | 1.024728  | 0.116984  | -1.433191 |
| C | -0.744422 | -0.208308 | -0.288445 |
| C | -1.426802 | -1.036063 | 0.610452  |
| C | -1.455116 | 0.782813  | -0.971532 |
| C | -2.793223 | -0.866309 | 0.828583  |
| H | -0.879167 | -1.823863 | 1.116912  |
| C | -2.822170 | 0.958417  | -0.751316 |
| H | -0.934287 | 1.420536  | -1.681772 |
| C | -3.494754 | 0.134122  | 0.151491  |
| H | -3.313464 | -1.518242 | 1.525173  |
| H | -3.361409 | 1.732535  | -1.290340 |
| H | -4.559907 | 0.264834  | 0.321154  |
| H | 2.000746  | -1.843773 | -0.398590 |

**45-a (Alkoxytrifluoroborate after dissociation from 45)**

B3LYP-D3 SCF energy (au): -826.895073933  
 B3LYP-D3 enthalpy (au): -826.652736933  
 B3LYP-D3 free energy (au): -826.713799933  
 M06 SCF energy in toluene (au): -826.677119434  
 M06 enthalpy in toluene (au): -826.434782434  
 M06 free energy in toluene (au): -826.495845434  
 M06 free energy in toluene (quasi-harmonic) (au): -826.498228501

Cartesian coordinates

| ATOMX | Y         | Z         |           |
|-------|-----------|-----------|-----------|
| C     | -2.395570 | 3.144446  | -0.541768 |
| H     | -1.707885 | 3.964229  | -0.752213 |
| H     | -3.444294 | 3.323172  | -0.770845 |
| C     | -1.972851 | 1.983461  | -0.036709 |
| H     | -2.671316 | 1.168089  | 0.144103  |
| C     | -0.538381 | 1.673990  | 0.297435  |
| H     | 0.105935  | 2.420867  | -0.188656 |
| C     | -0.304925 | 1.738665  | 1.815624  |
| H     | -0.569804 | 2.727446  | 2.208187  |
| H     | -0.916250 | 0.980075  | 2.311086  |
| H     | 0.745896  | 1.534698  | 2.053964  |
| C     | -0.163684 | 0.255472  | -0.246120 |
| O     | -0.812364 | -0.722900 | 0.494750  |
| B     | -1.830358 | -1.578264 | -0.145894 |
| F     | -1.480029 | -1.840363 | -1.485884 |

|   |           |           |           |
|---|-----------|-----------|-----------|
| F | -1.900420 | -2.761064 | 0.594456  |
| F | -3.095037 | -0.930016 | -0.127364 |
| C | 1.350151  | 0.056377  | -0.197536 |
| C | 2.216054  | 0.857806  | -0.953080 |
| C | 1.900713  | -0.938796 | 0.615669  |
| C | 3.598197  | 0.678540  | -0.891735 |
| H | 1.801669  | 1.624620  | -1.604691 |
| C | 3.283275  | -1.119982 | 0.682473  |
| H | 1.209945  | -1.563039 | 1.171694  |
| C | 4.139727  | -0.311436 | -0.067692 |
| H | 4.253528  | 1.308249  | -1.490453 |
| H | 3.694594  | -1.900270 | 1.319915  |
| H | 5.217077  | -0.454644 | -0.017975 |
| H | -0.465244 | 0.212748  | -1.302889 |

#### 45-b (product alcohol from 45-a)

B3LYP-D3 SCF energy (au): -502.829726107  
 B3LYP-D3 enthalpy (au): -502.593147107  
 B3LYP-D3 free energy (au): -502.644642107  
 M06 SCF energy in toluene (au): -502.563000124  
 M06 enthalpy in toluene (au): -502.326421124  
 M06 free energy in toluene (au): -502.377916124  
 M06 free energy in toluene (quasi-harmonic) (au): -502.381442017

#### Cartesian coordinates

| ATOMX | Y         | Z         |           |
|-------|-----------|-----------|-----------|
| C     | -3.862957 | 1.055655  | -0.298188 |
| H     | -3.521909 | 2.084910  | -0.392165 |
| H     | -4.901140 | 0.863303  | -0.555099 |
| C     | -3.048091 | 0.086671  | 0.121307  |
| H     | -3.440245 | -0.927837 | 0.220101  |
| C     | -1.593815 | 0.266974  | 0.478797  |
| H     | -1.400971 | 1.339776  | 0.610096  |
| C     | -1.252418 | -0.474003 | 1.777877  |
| H     | -1.924324 | -0.166761 | 2.585901  |
| H     | -1.355165 | -1.555092 | 1.635561  |
| H     | -0.222755 | -0.271964 | 2.085910  |
| C     | -0.695351 | -0.199021 | -0.709831 |
| O     | -0.929427 | -1.566841 | -1.029087 |
| C     | 0.775239  | -0.016248 | -0.409373 |
| C     | 1.317024  | 1.274349  | -0.384639 |
| C     | 1.602265  | -1.105174 | -0.118873 |
| C     | 2.659210  | 1.476776  | -0.067391 |
| H     | 0.684140  | 2.127078  | -0.621125 |
| C     | 2.947394  | -0.903979 | 0.195791  |
| H     | 1.184712  | -2.104696 | -0.149521 |
| C     | 3.479873  | 0.385327  | 0.225584  |
| H     | 3.065703  | 2.484377  | -0.055098 |
| H     | 3.580821  | -1.758811 | 0.417095  |
| H     | 4.527130  | 0.539718  | 0.469995  |

H -0.957382 0.433809 -1.572347  
H -1.853447 -1.637053 -1.312981

### **BF<sub>3</sub>•TMPH**

B3LYP-D3 SCF energy (au): -733.798851669  
B3LYP-D3 enthalpy (au): -733.493713669  
B3LYP-D3 free energy (au): -733.549751669  
M06 SCF energy in toluene (au): -733.548047902  
M06 enthalpy in toluene (au): -733.242909902  
M06 free energy in toluene (au): -733.298947902  
M06 free energy in toluene (quasi-harmonic) (au): -733.304744233

### Cartesian coordinates

| ATOMX | Y         | Z         |           |
|-------|-----------|-----------|-----------|
| B     | -1.859768 | -0.000005 | -0.029628 |
| F     | -2.195811 | 1.134219  | 0.674705  |
| F     | -2.335836 | 0.000156  | -1.325409 |
| F     | -2.195910 | -1.134355 | 0.674448  |
| N     | -0.143974 | -0.000040 | -0.320437 |
| C     | 0.586303  | 1.317490  | -0.007967 |
| C     | 0.586307  | -1.317465 | -0.007976 |
| C     | 2.036654  | 1.240342  | -0.526564 |
| C     | -0.123672 | 2.431974  | -0.797658 |
| C     | 0.562274  | 1.642088  | 1.491427  |
| C     | 2.036676  | -1.240324 | -0.526563 |
| C     | -0.123630 | -2.432024 | -0.797624 |
| C     | 0.562283  | -1.642064 | 1.491418  |
| C     | 2.796339  | 0.000011  | -0.068701 |
| H     | 2.549831  | 2.156403  | -0.212318 |
| H     | 2.018741  | 1.255629  | -1.626244 |
| H     | -1.115509 | 2.641268  | -0.403543 |
| H     | 0.482080  | 3.342197  | -0.739398 |
| H     | -0.218384 | 2.164535  | -1.857194 |
| H     | 0.888666  | 2.679213  | 1.622937  |
| H     | -0.444709 | 1.547587  | 1.894054  |
| H     | 1.239874  | 1.012830  | 2.070284  |
| H     | 2.018764  | -1.255609 | -1.626244 |
| H     | 2.549853  | -2.156381 | -0.212315 |
| H     | 0.482119  | -3.342243 | -0.739283 |
| H     | -1.115478 | -2.641282 | -0.403518 |
| H     | -0.218304 | -2.164648 | -1.857180 |
| H     | -0.444741 | -1.547766 | 1.894000  |
| H     | 0.888872  | -2.679124 | 1.622939  |
| H     | 1.239720  | -1.012668 | 2.070315  |
| H     | 2.922428  | 0.000010  | 1.019927  |
| H     | 3.805432  | 0.000026  | -0.496426 |
| H     | -0.191801 | -0.000017 | -1.342034 |

### **TMPH<sub>2</sub><sup>+</sup>**

B3LYP-D3 SCF energy (au): -409.601310687

B3LYP-D3 enthalpy (au): -409.302015687  
 B3LYP-D3 free energy (au): -409.348895687  
 M06 SCF energy in toluene (au): -409.393484027  
 M06 enthalpy in toluene (au): -409.094189027  
 M06 free energy in toluene (au): -409.141069027  
 M06 free energy in toluene (quasi-harmonic) (au): -409.147804340  
 M06 SCF energy in dichloromethane (au): -409.422639  
 M06 enthalpy in dichloromethane (au): -409.123344  
 M06 free energy in dichloromethane (au): -409.170224  
 M06 free energy in dichloromethane (quasi-harmonic) (au): -409.1769593

Cartesian coordinates

| ATOMX | Y         | Z                   |
|-------|-----------|---------------------|
| C     | 1.260288  | 1.256288 -0.437650  |
| C     | 0.000011  | 1.959041 0.077812   |
| C     | -1.260353 | 1.256326 -0.437534  |
| C     | -1.354883 | -0.221718 -0.030257 |
| C     | 1.354872  | -0.221713 -0.030259 |
| H     | -2.163516 | 1.755911 -0.072909  |
| H     | 0.000053  | 2.006577 1.172170   |
| H     | 0.000002  | 2.995724 -0.271265  |
| H     | 1.288607  | 1.325554 -1.533758  |
| H     | 2.163521  | 1.755928 -0.073275  |
| H     | -1.288861 | 1.325733 -1.533621  |
| C     | -2.400120 | -0.967066 -0.866805 |
| H     | -2.465049 | -2.025727 -0.590283 |
| H     | -3.382874 | -0.520535 -0.693088 |
| H     | -2.192333 | -0.892095 -1.940886 |
| C     | -1.641347 | -0.419634 1.459662  |
| H     | -2.682532 | -0.142579 1.645906  |
| H     | -1.525461 | -1.467491 1.758955  |
| H     | -1.018451 | 0.198228 2.105355   |
| C     | 2.400159  | -0.967067 -0.866755 |
| H     | 3.382890  | -0.520480 -0.693034 |
| H     | 2.465112  | -2.025708 -0.590175 |
| H     | 2.192399  | -0.892175 -1.940845 |
| C     | 1.641366  | -0.419546 1.459661  |
| H     | 1.525614  | -1.467409 1.758981  |
| H     | 2.682517  | -0.142352 1.645899  |
| H     | 1.018418  | 0.198248 2.105363   |
| N     | 0.000001  | -0.881881 -0.396997 |
| H     | -0.000024 | -1.840223 -0.029515 |
| H     | 0.000005  | -0.981431 -1.418251 |

**TMPH**

B3LYP-D3 SCF energy (au): -409.204234712  
 B3LYP-D3 enthalpy (au): -408.920257712  
 B3LYP-D3 free energy (au): -408.966777712  
 M06 SCF energy in toluene (au): -408.958146722  
 M06 enthalpy in toluene (au): -408.674169722



M06 free energy in toluene (au): -408.720689722  
M06 free energy in toluene (quasi-harmonic) (au): -408.727085010  
M06 SCF energy in dichloromethane (au): -408.960582  
M06 enthalpy in dichloromethane (au): -408.676605  
M06 free energy in dichloromethane (au): -408.723125  
M06 free energy in dichloromethane (quasi-harmonic) (au): -408.7295203

Cartesian coordinates

| ATOMX | Y         | Z         |           |
|-------|-----------|-----------|-----------|
| C     | 1.253787  | 1.237395  | -0.430464 |
| C     | 0.000010  | 1.948203  | 0.087157  |
| C     | -1.253921 | 1.237411  | -0.430177 |
| C     | -1.286611 | -0.256635 | -0.053688 |
| C     | 1.286720  | -0.256556 | -0.053585 |
| H     | -2.162614 | 1.723457  | -0.054256 |
| H     | 0.000152  | 1.974858  | 1.184158  |
| H     | -0.000040 | 2.993861  | -0.243964 |
| H     | 1.272811  | 1.315091  | -1.525406 |
| H     | 2.162614  | 1.723680  | -0.055190 |
| H     | -1.273544 | 1.315664  | -1.525073 |
| C     | -2.362082 | -0.967170 | -0.891525 |
| H     | -2.420339 | -2.031653 | -0.629248 |
| H     | -3.350618 | -0.527074 | -0.716905 |
| H     | -2.120991 | -0.892133 | -1.955933 |
| C     | -1.651002 | -0.435493 | 1.439227  |
| H     | -2.692412 | -0.141639 | 1.617921  |
| H     | -1.545351 | -1.486456 | 1.734269  |
| H     | -1.022570 | 0.161904  | 2.103013  |
| C     | 2.362319  | -0.967044 | -0.891247 |
| H     | 3.350814  | -0.526937 | -0.716410 |
| H     | 2.420550  | -2.031549 | -0.629030 |
| H     | 2.121510  | -0.891996 | -1.955722 |
| C     | 1.650794  | -0.435404 | 1.439311  |
| H     | 1.545621  | -1.486527 | 1.734069  |
| H     | 2.692008  | -0.141139 | 1.618469  |
| H     | 1.021785  | 0.161407  | 2.103021  |
| N     | 0.000066  | -0.856251 | -0.451603 |
| H     | 0.000061  | -1.847312 | -0.216614 |

**TS1**

B3LYP-D3 SCF energy (au): -1690.76704946  
B3LYP-D3 enthalpy (au): -1689.97436046  
B3LYP-D3 free energy (au): -1690.08772846  
M06 SCF energy in toluene (au): -1689.90825477  
M06 enthalpy in toluene (au): -1689.11556577  
M06 free energy in toluene (au): -1689.22893377  
M06 free energy in toluene (quasi-harmonic) (au): -1689.22133431  
M06 SCF energy in dichloromethane (au): -1689.927515  
M06 enthalpy in dichloromethane (au): -1689.134826  
M06 free energy in dichloromethane (au): -1689.248194

M06 free energy in dichloromethane (quasi-harmonic) (au): -1689.240595

Cartesian coordinates

| ATOMX | Y         | Z         |           |
|-------|-----------|-----------|-----------|
| C     | -3.554469 | -0.275982 | -0.684018 |
| C     | -3.826493 | 0.116324  | 0.655447  |
| C     | -6.182182 | 0.844069  | -1.451866 |
| C     | -5.028405 | -0.271759 | 1.468354  |
| C     | -6.949132 | 0.313408  | -0.216297 |
| C     | -6.287158 | 0.563925  | 1.150316  |
| H     | -5.254857 | -1.333520 | 1.314479  |
| H     | -6.883372 | 1.363657  | -2.114278 |
| H     | -7.154230 | -0.760508 | -0.330108 |
| H     | -5.460506 | 1.608086  | -1.133326 |
| H     | -4.787651 | -0.156490 | 2.531217  |
| H     | -7.932367 | 0.795491  | -0.183153 |
| H     | -7.021600 | 0.344998  | 1.934544  |
| H     | -6.044013 | 1.630882  | 1.245200  |
| C     | -4.461759 | -1.106917 | -1.536637 |
| H     | -5.003364 | -1.816113 | -0.902128 |
| H     | -3.884693 | -1.702009 | -2.252634 |
| C     | -5.465216 | -0.216472 | -2.302660 |
| H     | -4.936524 | 0.290696  | -3.119740 |
| H     | -6.206541 | -0.874343 | -2.772448 |
| C     | -2.786694 | 1.025255  | 1.059056  |
| C     | -2.350913 | 0.389036  | -1.096603 |
| C     | -1.906698 | 1.246016  | -0.040333 |
| C     | -0.737541 | 2.127751  | -0.075288 |
| C     | -0.130286 | 2.464745  | -1.301666 |
| C     | -0.162060 | 2.632755  | 1.099404  |
| C     | 1.022506  | 3.230813  | -1.345205 |
| H     | -0.573967 | 2.129140  | -2.233691 |
| C     | 0.996091  | 3.406148  | 1.071800  |
| H     | -0.610366 | 2.405081  | 2.061656  |
| C     | 1.610983  | 3.688976  | -0.155198 |
| H     | 1.490558  | 3.490900  | -2.288379 |
| H     | 1.416758  | 3.765348  | 2.002853  |
| H     | -1.896647 | 0.292326  | -2.072972 |
| H     | -2.735800 | 1.513442  | 2.022884  |
| O     | 2.773370  | 4.371454  | -0.296786 |
| C     | 3.352770  | 4.973317  | 0.858727  |
| H     | 2.656669  | 5.679009  | 1.326171  |
| H     | 3.655818  | 4.216345  | 1.592678  |
| H     | 4.233242  | 5.508850  | 0.503622  |
| Fe    | -1.945974 | -0.878388 | 0.571347  |
| C     | -1.805570 | -2.421396 | -0.297072 |
| C     | -2.185372 | -1.588303 | 2.179077  |
| O     | -2.355762 | -2.017091 | 3.232035  |
| O     | -1.743719 | -3.406379 | -0.888225 |
| C     | 0.129219  | -0.816961 | 1.122657  |

|   |          |           |           |
|---|----------|-----------|-----------|
| H | 0.396358 | -1.674671 | 1.740213  |
| H | 0.171029 | 0.131143  | 1.652101  |
| C | 0.615894 | -0.833775 | -0.206107 |
| H | 0.527850 | 0.096775  | -0.762985 |
| C | 1.295353 | -1.879381 | -0.857873 |
| H | 1.267812 | -2.842478 | -0.338680 |
| C | 1.239010 | -1.983919 | -2.376765 |
| H | 1.293019 | -0.992657 | -2.843017 |
| H | 2.070751 | -2.582157 | -2.766418 |
| H | 0.312151 | -2.462425 | -2.714589 |
| H | 2.599245 | -1.480220 | -0.647380 |
| N | 3.973005 | -1.262037 | -0.652268 |
| C | 4.303166 | 0.201091  | -0.469309 |
| C | 4.654666 | -2.305412 | 0.200194  |
| C | 5.833006 | 0.376809  | -0.407071 |
| C | 3.741748 | 0.919253  | -1.704078 |
| C | 3.628969 | 0.778576  | 0.783916  |
| C | 6.169422 | -2.022888 | 0.257403  |
| C | 4.406914 | -3.650813 | -0.497290 |
| C | 4.031966 | -2.348649 | 1.603647  |
| C | 6.501922 | -0.567167 | 0.596017  |
| H | 6.054806 | 1.423630  | -0.169082 |
| H | 6.250082 | 0.187349  | -1.406191 |
| H | 2.653944 | 0.823282  | -1.763501 |
| H | 3.975834 | 1.986383  | -1.649228 |
| H | 4.179637 | 0.524688  | -2.629127 |
| H | 2.565287 | 0.536431  | 0.821388  |
| H | 4.090211 | 0.438431  | 1.711389  |
| H | 3.719502 | 1.867543  | 0.749093  |
| H | 6.607065 | -2.266486 | -0.720872 |
| H | 6.625090 | -2.706911 | 0.982367  |
| H | 3.343319 | -3.906328 | -0.519426 |
| H | 4.783659 | -3.640862 | -1.527493 |
| H | 4.933671 | -4.446703 | 0.037170  |
| H | 2.939430 | -2.370410 | 1.551495  |
| H | 4.363693 | -3.259123 | 2.111680  |
| H | 4.326714 | -1.503393 | 2.226294  |
| H | 6.188252 | -0.327966 | 1.618879  |
| H | 7.587090 | -0.423591 | 0.569492  |
| H | 4.219190 | -1.482874 | -1.619436 |

### TS1'

B3LYP-D3 SCF energy (au): -1690.76646273

B3LYP-D3 enthalpy (au): -1689.97365473

B3LYP-D3 free energy (au): -1690.08684573

M06 SCF energy in toluene (au): -1689.90788365

M06 enthalpy in toluene (au): -1689.11507565

M06 free energy in toluene (au): -1689.22826665

M06 free energy in toluene (quasi-harmonic) (au): -1689.22083692

Cartesian coordinates

| ATOMX | Y         | Z         |           |
|-------|-----------|-----------|-----------|
| C     | 3.614887  | -0.079081 | 0.767004  |
| C     | 3.824279  | 0.307646  | -0.585667 |
| C     | 6.111070  | 1.352696  | 1.460394  |
| C     | 5.049410  | 0.028435  | -1.408148 |
| C     | 6.915018  | 0.875590  | 0.226628  |
| C     | 6.209625  | 1.010083  | -1.134571 |
| H     | 5.397209  | -0.995260 | -1.226247 |
| H     | 6.758867  | 1.966709  | 2.095821  |
| H     | 7.241419  | -0.164660 | 0.366305  |
| H     | 5.303633  | 2.021692  | 1.133879  |
| H     | 4.782805  | 0.083443  | -2.469579 |
| H     | 7.837042  | 1.463843  | 0.162637  |
| H     | 6.952599  | 0.852130  | -1.925334 |
| H     | 5.845786  | 2.039469  | -1.254590 |
| C     | 4.622384  | -0.775250 | 1.627885  |
| H     | 5.230902  | -1.437932 | 1.003612  |
| H     | 4.126630  | -1.410946 | 2.369364  |
| C     | 5.530133  | 0.243643  | 2.351978  |
| H     | 4.959375  | 0.712081  | 3.163882  |
| H     | 6.347373  | -0.312787 | 2.826971  |
| C     | 2.683761  | 1.072325  | -1.000420 |
| C     | 2.355506  | 0.475830  | 1.183750  |
| C     | 1.801950  | 1.239960  | 0.114131  |
| C     | 0.545484  | 1.992695  | 0.144142  |
| C     | -0.174968 | 2.147645  | 1.346470  |
| C     | -0.002468 | 2.552584  | -1.018829 |
| C     | -1.403681 | 2.784345  | 1.371816  |
| H     | 0.233160  | 1.764039  | 2.275917  |
| C     | -1.234506 | 3.203210  | -1.008390 |
| H     | 0.531340  | 2.474720  | -1.960628 |
| C     | -1.957392 | 3.298478  | 0.187815  |
| H     | -1.959683 | 2.898311  | 2.296009  |
| H     | -1.626275 | 3.612240  | -1.931394 |
| H     | 1.934430  | 0.363436  | 2.173282  |
| H     | 2.563516  | 1.509460  | -1.982117 |
| O     | -3.193416 | 3.841585  | 0.303858  |
| C     | -3.770643 | 4.465606  | -0.840593 |
| H     | -3.936133 | 3.740043  | -1.646366 |
| H     | -4.728217 | 4.866383  | -0.507955 |
| H     | -3.137794 | 5.282494  | -1.205665 |
| Fe    | 2.059422  | -0.889151 | -0.432885 |
| C     | 1.924503  | -2.313741 | 0.621734  |
| C     | 2.511218  | -1.779347 | -1.898252 |
| O     | 2.816207  | -2.332346 | -2.858796 |
| O     | 1.898736  | -3.198858 | 1.356510  |
| C     | 0.065900  | -0.950870 | -1.249307 |
| H     | -0.061408 | -1.766515 | -1.957952 |
| H     | 0.039704  | 0.031380  | -1.711841 |

|   |           |           |           |
|---|-----------|-----------|-----------|
| C | -0.578781 | -1.087600 | 0.002221  |
| H | -0.600809 | -0.197082 | 0.625433  |
| C | -1.297667 | -2.193792 | 0.500820  |
| H | -2.589209 | -1.740719 | 0.276760  |
| N | -3.956534 | -1.534748 | 0.118743  |
| C | -4.568098 | -1.076558 | 1.422033  |
| C | -4.258992 | -0.784934 | -1.157674 |
| C | -6.070569 | -0.792872 | 1.221014  |
| C | -4.395032 | -2.241827 | 2.407201  |
| C | -3.826017 | 0.152769  | 1.968040  |
| C | -5.777509 | -0.547542 | -1.262253 |
| C | -3.781657 | -1.689105 | -2.301880 |
| C | -3.486253 | 0.539673  | -1.224819 |
| C | -6.366119 | 0.085025  | 0.002201  |
| H | -6.464655 | -0.336548 | 2.136281  |
| H | -6.593111 | -1.752073 | 1.099597  |
| H | -3.340633 | -2.443917 | 2.616903  |
| H | -4.886794 | -2.000450 | 3.354090  |
| H | -4.854462 | -3.160619 | 2.022648  |
| H | -4.124216 | 0.311079  | 3.009080  |
| H | -2.742807 | 0.003238  | 1.948701  |
| H | -4.049048 | 1.070510  | 1.423349  |
| H | -6.274645 | -1.510688 | -1.445300 |
| H | -5.974081 | 0.077746  | -2.140975 |
| H | -4.051929 | -1.243206 | -3.263623 |
| H | -2.694795 | -1.815458 | -2.281084 |
| H | -4.249391 | -2.680017 | -2.254244 |
| H | -2.430592 | 0.405271  | -0.985833 |
| H | -3.544913 | 0.924294  | -2.248270 |
| H | -3.888970 | 1.306876  | -0.564738 |
| H | -5.965810 | 1.095089  | 0.149590  |
| H | -7.448989 | 0.199773  | -0.112509 |
| H | -4.295812 | -2.487353 | -0.031876 |
| H | -1.342343 | -2.234210 | 1.593607  |
| C | -1.240883 | -3.556628 | -0.167591 |
| H | -2.024532 | -4.212232 | 0.227918  |
| H | -1.385254 | -3.487980 | -1.251141 |
| H | -0.283286 | -4.061543 | 0.005569  |

### TS2-1

B3LYP-D3 SCF energy (au): -1951.32290113  
 B3LYP-D3 enthalpy (au): -1950.68696713  
 B3LYP-D3 free energy (au): -1950.79839313  
 M06 SCF energy in toluene (au): -1950.52298571  
 M06 enthalpy in toluene (au): -1949.88705171  
 M06 free energy in toluene (au): -1949.99847771  
 M06 free energy in toluene (quasi-harmonic) (au): -1949.99034758

Cartesian coordinates

ATOMX            Y            Z

|    |           |           |           |
|----|-----------|-----------|-----------|
| Fe | -1.656571 | 0.633204  | -0.417380 |
| C  | -1.718190 | 2.078727  | 0.619156  |
| O  | -1.823494 | 2.973165  | 1.332122  |
| C  | -1.889997 | 1.511153  | -1.936726 |
| O  | -2.066213 | 2.035704  | -2.945101 |
| C  | 0.416260  | 0.879595  | -0.847585 |
| H  | 0.570329  | 1.887924  | -1.217097 |
| H  | 0.611644  | 0.085516  | -1.564806 |
| C  | 0.877341  | 0.640499  | 0.468251  |
| H  | 1.047984  | -0.397095 | 0.747009  |
| C  | 1.296330  | 1.606884  | 1.398570  |
| H  | 0.937148  | 2.621117  | 1.260678  |
| C  | 1.514488  | 1.196722  | 2.835777  |
| H  | 1.952187  | 0.193900  | 2.904977  |
| H  | 2.181298  | 1.896697  | 3.352200  |
| H  | 0.566681  | 1.190962  | 3.391721  |
| C  | 3.043113  | 2.049140  | 0.554685  |
| O  | 2.783540  | 2.722008  | -0.537180 |
| B  | 2.121216  | 4.105058  | -0.447336 |
| F  | 2.331487  | 4.600841  | 0.837557  |
| F  | 2.672699  | 4.875818  | -1.434109 |
| F  | 0.737969  | 3.894008  | -0.654398 |
| H  | 3.317688  | 2.635707  | 1.435828  |
| C  | 3.789004  | 0.775440  | 0.368150  |
| C  | 4.447755  | 0.170994  | 1.446071  |
| C  | 3.824349  | 0.159052  | -0.890994 |
| C  | 5.119011  | -1.039985 | 1.273912  |
| H  | 4.445169  | 0.658533  | 2.417094  |
| C  | 4.488699  | -1.052518 | -1.059408 |
| H  | 3.335602  | 0.652307  | -1.723030 |
| C  | 5.139048  | -1.655258 | 0.020913  |
| H  | 5.639923  | -1.492483 | 2.113606  |
| H  | 4.509877  | -1.528104 | -2.035496 |
| H  | 5.673156  | -2.589298 | -0.122694 |
| C  | -3.154100 | -0.321479 | 0.760395  |
| C  | -3.428950 | -0.500358 | -0.623866 |
| C  | -6.289566 | -0.970062 | 1.302467  |
| C  | -4.715239 | -0.135762 | -1.297447 |
| C  | -5.899987 | -1.935721 | 0.156672  |
| C  | -5.732292 | -1.295076 | -1.230629 |
| H  | -5.133268 | 0.753593  | -0.813534 |
| H  | -6.717137 | -0.045983 | 0.888057  |
| H  | -6.669181 | -2.711253 | 0.062851  |
| H  | -7.095689 | -1.428688 | 1.886948  |
| H  | -4.539468 | 0.133744  | -2.344729 |
| H  | -4.977573 | -2.466435 | 0.425667  |
| H  | -6.702094 | -0.919423 | -1.581537 |
| H  | -5.426098 | -2.076463 | -1.938165 |
| C  | -4.061308 | 0.326339  | 1.767901  |
| H  | -4.525379 | 1.220654  | 1.335280  |

|   |           |           |           |
|---|-----------|-----------|-----------|
| H | -3.457506 | 0.671800  | 2.614680  |
| C | -5.168898 | -0.609588 | 2.294601  |
| H | -4.709543 | -1.533763 | 2.671511  |
| H | -5.624201 | -0.115397 | 3.161958  |
| C | -2.334701 | -1.242443 | -1.190416 |
| C | -1.883981 | -0.927018 | 1.033074  |
| C | -1.399654 | -1.549474 | -0.162639 |
| C | -0.164708 | -2.326450 | -0.299481 |
| C | 0.450932  | -2.888511 | 0.826982  |
| C | 0.454759  | -2.515184 | -1.549555 |
| C | 1.646499  | -3.596108 | 0.730232  |
| H | -0.012012 | -2.777284 | 1.802723  |
| C | 1.643590  | -3.216532 | -1.661431 |
| H | 0.009326  | -2.086112 | -2.441789 |
| C | 2.255244  | -3.758660 | -0.520235 |
| H | 2.092063  | -4.009346 | 1.626316  |
| H | 2.129045  | -3.351054 | -2.621993 |
| H | -1.395924 | -0.938181 | 1.997742  |
| H | -2.268516 | -1.559849 | -2.222362 |
| O | 3.419864  | -4.423374 | -0.729038 |
| C | 4.064429  | -5.004777 | 0.395715  |
| H | 4.969042  | -5.476720 | 0.009760  |
| H | 4.335704  | -4.240851 | 1.133779  |
| H | 3.429831  | -5.764783 | 0.868848  |

### TS2'-1

B3LYP-D3 SCF energy (au): -1951.31502160

B3LYP-D3 enthalpy (au): -1950.67854160

B3LYP-D3 free energy (au): -1950.79069360

M06 SCF energy in toluene (au): -1950.52112318

M06 enthalpy in toluene (au): -1949.88464318

M06 free energy in toluene (au): -1949.99679518

M06 free energy in toluene (quasi-harmonic) (au): -1949.98824758

### Cartesian coordinates

| ATOMX | Y         | Z         |           |
|-------|-----------|-----------|-----------|
| Fe    | 1.776001  | -0.747424 | -0.449303 |
| C     | 1.515311  | -2.164934 | 0.596468  |
| O     | 1.407840  | -3.054491 | 1.315442  |
| C     | 2.098809  | -1.671427 | -1.923007 |
| O     | 2.337410  | -2.234553 | -2.897366 |
| C     | -0.226557 | -0.716867 | -1.193075 |
| H     | -0.498745 | -1.653329 | -1.678460 |
| H     | -0.193943 | 0.138523  | -1.863227 |
| C     | -0.816154 | -0.515379 | 0.077473  |
| H     | -0.818875 | 0.494187  | 0.480801  |
| C     | -1.545255 | -1.494482 | 0.783379  |
| H     | -1.351506 | -2.521020 | 0.483543  |
| C     | -1.779165 | -1.338269 | 2.268379  |
| H     | -2.625921 | -1.956815 | 2.580960  |

|   |           |           |           |
|---|-----------|-----------|-----------|
| H | -0.899561 | -1.676368 | 2.831725  |
| H | -1.990695 | -0.299208 | 2.543838  |
| C | -3.217602 | -1.393930 | -0.120702 |
| O | -3.727035 | -2.604030 | 0.011738  |
| B | -3.092030 | -3.741147 | -0.795037 |
| F | -4.106717 | -4.569855 | -1.194878 |
| F | -2.397335 | -3.172439 | -1.882359 |
| F | -2.176167 | -4.373439 | 0.055001  |
| H | -2.873126 | -1.151183 | -1.127177 |
| C | -3.980980 | -0.295147 | 0.540865  |
| C | -3.698650 | 1.042334  | 0.232492  |
| C | -4.979159 | -0.586950 | 1.475869  |
| C | -4.395696 | 2.075424  | 0.855335  |
| H | -2.928105 | 1.274820  | -0.499233 |
| C | -5.676591 | 0.446426  | 2.102137  |
| H | -5.203541 | -1.626968 | 1.685048  |
| C | -5.385294 | 1.777128  | 1.797348  |
| H | -4.171657 | 3.107693  | 0.604017  |
| H | -6.452158 | 0.211623  | 2.826018  |
| H | -5.930344 | 2.580424  | 2.285703  |
| C | 3.281729  | -0.012446 | 0.856074  |
| C | 3.678754  | 0.194456  | -0.493295 |
| C | 5.878592  | 1.126721  | 1.700182  |
| C | 4.929784  | -0.327256 | -1.141208 |
| C | 6.725001  | 0.417491  | 0.614983  |
| C | 6.189533  | 0.505694  | -0.825655 |
| H | 5.101832  | -1.366295 | -0.835458 |
| H | 6.541378  | 1.713282  | 2.346979  |
| H | 6.873453  | -0.638409 | 0.882457  |
| H | 5.211861  | 1.856479  | 1.222773  |
| H | 4.782002  | -0.346235 | -2.227033 |
| H | 7.727400  | 0.861015  | 0.608769  |
| H | 6.979796  | 0.167148  | -1.507242 |
| H | 5.996555  | 1.558063  | -1.075297 |
| C | 4.084930  | -0.747407 | 1.884068  |
| H | 4.648935  | -1.549071 | 1.395402  |
| H | 3.428608  | -1.229162 | 2.616667  |
| C | 5.054952  | 0.205754  | 2.614790  |
| H | 4.480108  | 0.830996  | 3.310039  |
| H | 5.730924  | -0.402822 | 3.228800  |
| C | 2.708167  | 1.064845  | -1.100365 |
| C | 2.072268  | 0.728872  | 1.073631  |
| C | 1.746121  | 1.445481  | -0.119697 |
| C | 0.613269  | 2.358209  | -0.296392 |
| C | -0.031239 | 2.920182  | 0.823381  |
| C | 0.109537  | 2.670812  | -1.565941 |
| C | -1.145008 | 3.729475  | 0.680379  |
| H | 0.346245  | 2.715780  | 1.820131  |
| C | -1.014195 | 3.479838  | -1.726441 |
| H | 0.583231  | 2.257946  | -2.451223 |



|   |           |          |           |
|---|-----------|----------|-----------|
| C | -1.655730 | 4.005727 | -0.597719 |
| H | -1.649156 | 4.150352 | 1.543150  |
| H | -1.384500 | 3.681499 | -2.723970 |
| H | 1.524448  | 0.763045 | 2.005158  |
| H | 2.749762  | 1.421596 | -2.120722 |
| O | -2.771059 | 4.778891 | -0.633247 |
| C | -3.401500 | 4.994063 | -1.890907 |
| H | -3.699625 | 4.043658 | -2.349749 |
| H | -4.288772 | 5.591321 | -1.679396 |
| H | -2.745349 | 5.544600 | -2.576093 |

## TS2-2

B3LYP-D3 SCF energy (au): -1951.32846263  
 B3LYP-D3 enthalpy (au): -1950.69249963  
 B3LYP-D3 free energy (au): -1950.80295863  
 M06 SCF energy in toluene (au): -1950.52275758  
 M06 enthalpy in toluene (au): -1949.88679458  
 M06 free energy in toluene (au): -1949.99725358  
 M06 free energy in toluene (quasi-harmonic) (au): -1949.98960795

## Cartesian coordinates

| ATOMX | Y         | Z         |           |
|-------|-----------|-----------|-----------|
| Fe    | -1.704770 | -0.899151 | 0.755918  |
| C     | -1.236508 | -2.480735 | 0.113768  |
| O     | -0.978978 | -3.514135 | -0.326321 |
| C     | -1.947889 | -1.444697 | 2.415332  |
| O     | -2.134179 | -1.768036 | 3.506240  |
| C     | 0.281558  | -0.417170 | 1.396239  |
| H     | 0.640649  | -1.161830 | 2.108722  |
| H     | 0.156478  | 0.573575  | 1.826120  |
| C     | 0.873557  | -0.469185 | 0.107462  |
| H     | 0.734458  | 0.390071  | -0.538777 |
| C     | 1.707167  | -1.491861 | -0.381706 |
| H     | 1.760616  | -2.387827 | 0.237094  |
| C     | 1.818205  | -1.724132 | -1.870300 |
| H     | 1.894484  | -0.770149 | -2.396951 |
| H     | 2.702231  | -2.325111 | -2.106984 |
| H     | 0.940039  | -2.269171 | -2.241913 |
| C     | 3.509436  | -0.644081 | 0.098470  |
| O     | 3.838091  | 0.199136  | -0.849757 |
| B     | 3.192435  | 1.565061  | -0.905940 |
| F     | 4.156062  | 2.491896  | -1.253457 |
| F     | 2.180319  | 1.497219  | -1.884165 |
| F     | 2.639486  | 1.845807  | 0.349606  |
| H     | 3.215228  | -0.215361 | 1.056386  |
| C     | 4.324509  | -1.880580 | 0.175616  |
| C     | 4.276629  | -2.681755 | 1.325662  |
| C     | 5.149177  | -2.257746 | -0.892502 |
| C     | 5.032860  | -3.847529 | 1.404093  |
| H     | 3.644677  | -2.382697 | 2.158943  |

|   |           |           |           |
|---|-----------|-----------|-----------|
| C | 5.906054  | -3.425847 | -0.811836 |
| H | 5.197469  | -1.614553 | -1.763888 |
| C | 5.847694  | -4.224418 | 0.332069  |
| H | 4.993586  | -4.459827 | 2.300519  |
| H | 6.546892  | -3.710997 | -1.641413 |
| H | 6.439414  | -5.133415 | 0.392948  |
| C | -3.127255 | -0.658610 | -0.809663 |
| C | -3.719516 | -0.360731 | 0.449662  |
| C | -6.134127 | -1.099025 | -1.945617 |
| C | -4.966221 | -0.994198 | 0.983794  |
| C | -6.269303 | 0.103935  | -0.980254 |
| C | -6.225864 | -0.231653 | 0.519368  |
| H | -5.014652 | -2.034106 | 0.642604  |
| H | -6.370393 | -2.034503 | -1.418468 |
| H | -7.222805 | 0.610841  | -1.169196 |
| H | -6.895030 | -1.004974 | -2.729174 |
| H | -4.944434 | -1.026431 | 2.078902  |
| H | -5.491981 | 0.844057  | -1.209471 |
| H | -7.106420 | -0.829515 | 0.788056  |
| H | -6.300765 | 0.705732  | 1.085488  |
| C | -3.591407 | -1.704405 | -1.783453 |
| H | -3.875128 | -2.618912 | -1.248859 |
| H | -2.753346 | -1.973917 | -2.436175 |
| C | -4.777213 | -1.246891 | -2.657759 |
| H | -4.518985 | -0.296684 | -3.144633 |
| H | -4.889647 | -1.984928 | -3.461796 |
| C | -3.018791 | 0.771354  | 0.995840  |
| C | -2.048320 | 0.260925  | -1.011492 |
| C | -2.019240 | 1.198030  | 0.075795  |
| C | -1.099645 | 2.319730  | 0.233624  |
| C | -0.326733 | 2.767856  | -0.846396 |
| C | -0.916229 | 2.948518  | 1.482470  |
| C | 0.627258  | 3.764151  | -0.694991 |
| H | -0.438546 | 2.309970  | -1.822705 |
| C | 0.034728  | 3.938976  | 1.648153  |
| H | -1.498066 | 2.627637  | 2.341792  |
| C | 0.845355  | 4.327844  | 0.566390  |
| H | 1.249297  | 4.026386  | -1.539490 |
| H | 0.208231  | 4.398478  | 2.615424  |
| H | -1.400483 | 0.272771  | -1.876607 |
| H | -3.259414 | 1.250779  | 1.934972  |
| O | 1.806623  | 5.235982  | 0.840363  |
| C | 2.815015  | 5.458058  | -0.148931 |
| H | 3.544047  | 6.118415  | 0.323043  |
| H | 3.292938  | 4.518296  | -0.442336 |
| H | 2.396310  | 5.957896  | -1.031839 |

**TS2'-2**

B3LYP-D3 SCF energy (au): -1951.32438266

B3LYP-D3 enthalpy (au): -1950.68792066

B3LYP-D3 free energy (au): -1950.79919666  
M06 SCF energy in toluene (au): -1950.52103008  
M06 enthalpy in toluene (au): -1949.88456808  
M06 free energy in toluene (au): -1949.99584408  
M06 free energy in toluene (quasi-harmonic) (au): -1949.98776942

Cartesian coordinates

| ATOMX | Y         | Z         |           |
|-------|-----------|-----------|-----------|
| Fe    | -1.424683 | -0.759542 | -0.951054 |
| C     | -0.636813 | -0.205116 | -2.449005 |
| O     | -0.188289 | 0.192212  | -3.431865 |
| C     | -1.776281 | -2.402133 | -1.492037 |
| O     | -2.034091 | -3.480767 | -1.805417 |
| C     | 0.290308  | -1.679236 | -0.038686 |
| H     | 0.662091  | -2.558288 | -0.563618 |
| H     | -0.089926 | -1.880922 | 0.958865  |
| C     | 1.015077  | -0.485614 | -0.207777 |
| H     | 0.775565  | 0.331773  | 0.455212  |
| C     | 2.193118  | -0.311143 | -0.969598 |
| H     | 2.419170  | -1.113266 | -1.671885 |
| C     | 2.590449  | 1.075210  | -1.433224 |
| H     | 3.638954  | 1.088649  | -1.753513 |
| H     | 1.983118  | 1.403263  | -2.285162 |
| H     | 2.468258  | 1.797149  | -0.622841 |
| C     | 3.388556  | -0.715825 | 0.565105  |
| O     | 2.790391  | -0.834124 | 1.744273  |
| B     | 2.315694  | 0.354629  | 2.528935  |
| F     | 0.898168  | 0.233759  | 2.647765  |
| F     | 2.904577  | 0.345295  | 3.766439  |
| F     | 2.605047  | 1.531322  | 1.810515  |
| H     | 3.973259  | 0.196009  | 0.425251  |
| C     | 4.026256  | -1.967244 | 0.081674  |
| C     | 5.012503  | -1.922191 | -0.914161 |
| C     | 3.624968  | -3.207619 | 0.594624  |
| C     | 5.581368  | -3.097586 | -1.397190 |
| H     | 5.332244  | -0.959947 | -1.307115 |
| C     | 4.192750  | -4.384012 | 0.106574  |
| H     | 2.884985  | -3.225835 | 1.386463  |
| C     | 5.168743  | -4.333697 | -0.890858 |
| H     | 6.349863  | -3.051911 | -2.163769 |
| H     | 3.879271  | -5.342369 | 0.511521  |
| H     | 5.613074  | -5.251123 | -1.266518 |
| C     | -3.477562 | -0.374061 | -0.540187 |
| C     | -2.789528 | -0.735056 | 0.674703  |
| C     | -6.222110 | -1.195894 | 0.988391  |
| C     | -3.196484 | -1.843316 | 1.594136  |
| C     | -5.374543 | -0.518519 | 2.093429  |
| C     | -4.209207 | -1.352445 | 2.650252  |
| H     | -3.637086 | -2.657586 | 1.007842  |
| H     | -6.066692 | -2.284058 | 1.006768  |

|   |           |           |           |
|---|-----------|-----------|-----------|
| H | -6.023753 | -0.265075 | 2.939487  |
| H | -7.283051 | -1.048152 | 1.221369  |
| H | -2.317605 | -2.259159 | 2.098917  |
| H | -4.989691 | 0.440001  | 1.721721  |
| H | -4.604062 | -2.228491 | 3.180705  |
| H | -3.675545 | -0.749116 | 3.395154  |
| C | -4.674330 | -1.069265 | -1.122007 |
| H | -4.552442 | -2.156627 | -1.054128 |
| H | -4.732561 | -0.829120 | -2.190034 |
| C | -6.005384 | -0.677846 | -0.445327 |
| H | -6.105979 | 0.415991  | -0.454218 |
| H | -6.813238 | -1.067578 | -1.077316 |
| C | -1.794189 | 0.252018  | 0.909520  |
| C | -2.859679 | 0.798239  | -1.043796 |
| C | -1.814652 | 1.219868  | -0.139664 |
| C | -0.951057 | 2.399322  | -0.267584 |
| C | -0.982505 | 3.206447  | -1.420932 |
| C | -0.029525 | 2.721341  | 0.737504  |
| C | -0.119512 | 4.279897  | -1.565358 |
| H | -1.678877 | 2.984736  | -2.224152 |
| C | 0.851945  | 3.789957  | 0.598816  |
| H | 0.053787  | 2.112668  | 1.629510  |
| C | 0.813299  | 4.576544  | -0.557019 |
| H | -0.135534 | 4.899594  | -2.455758 |
| H | 1.582367  | 3.955812  | 1.379425  |
| H | -3.146951 | 1.298615  | -1.958855 |
| H | -1.075865 | 0.223463  | 1.719637  |
| O | 1.633819  | 5.631633  | -0.800284 |
| C | 2.631908  | 5.929939  | 0.167003  |
| H | 2.185164  | 6.198098  | 1.132565  |
| H | 3.314691  | 5.083214  | 0.309314  |
| H | 3.184199  | 6.783745  | -0.228161 |

### TS2-3

B3LYP-D3 SCF energy (au): -1951.30627981

B3LYP-D3 enthalpy (au): -1950.67031181

B3LYP-D3 free energy (au): -1950.78312181

M06 SCF energy in toluene (au): -1950.51798792

M06 enthalpy in toluene (au): -1949.88201992

M06 free energy in toluene (au): -1949.99482992

M06 free energy in toluene (quasi-harmonic) (au): -1949.98585411

### Cartesian coordinates

| ATOMX | Y         | Z         |          |
|-------|-----------|-----------|----------|
| Fe    | -1.772523 | -0.473027 | 0.877654 |
| C     | -1.531370 | -2.232660 | 0.937751 |
| O     | -1.427198 | -3.377513 | 0.963691 |
| C     | -1.993956 | -0.273832 | 2.618351 |
| O     | -2.163329 | -0.104218 | 3.744801 |
| C     | 0.276849  | -0.022972 | 1.306612 |

|   |           |           |           |
|---|-----------|-----------|-----------|
| H | 0.615279  | -0.474279 | 2.238174  |
| H | 0.255932  | 1.061937  | 1.334611  |
| C | 0.754322  | -0.631721 | 0.124699  |
| H | 0.618760  | -0.083407 | -0.803495 |
| C | 1.531851  | -1.806992 | 0.028335  |
| H | 1.631872  | -2.365882 | 0.961461  |
| C | 1.370664  | -2.681162 | -1.202472 |
| H | 1.451926  | -2.092127 | -2.122382 |
| H | 2.144211  | -3.448902 | -1.233446 |
| H | 0.389521  | -3.173594 | -1.186622 |
| C | 3.286004  | -1.097570 | -0.083028 |
| O | 4.067932  | -2.154474 | -0.045703 |
| B | 4.639916  | -2.763371 | -1.345510 |
| F | 6.008571  | -2.666041 | -1.244658 |
| F | 4.200751  | -4.081837 | -1.392080 |
| F | 4.135730  | -2.022901 | -2.421507 |
| H | 3.224063  | -0.599585 | -1.054079 |
| C | 3.432037  | -0.154354 | 1.068935  |
| C | 3.136230  | 1.202570  | 0.896803  |
| C | 3.844421  | -0.613389 | 2.323637  |
| C | 3.235869  | 2.088807  | 1.968550  |
| H | 2.820592  | 1.563406  | -0.079239 |
| C | 3.938563  | 0.271881  | 3.397315  |
| H | 4.103435  | -1.661163 | 2.434374  |
| C | 3.632202  | 1.624613  | 3.224570  |
| H | 3.001563  | 3.140439  | 1.823309  |
| H | 4.260507  | -0.091272 | 4.369456  |
| H | 3.711213  | 2.312911  | 4.061567  |
| C | -3.287894 | -0.685126 | -0.608989 |
| C | -3.712446 | 0.222164  | 0.401184  |
| C | -6.417974 | -1.055934 | -1.378284 |
| C | -4.984372 | 0.103482  | 1.181561  |
| C | -6.289099 | 0.449808  | -1.041693 |
| C | -6.156016 | 0.794307  | 0.450590  |
| H | -5.214156 | -0.956803 | 1.332554  |
| H | -6.737279 | -1.615957 | -0.487746 |
| H | -7.173310 | 0.978765  | -1.415729 |
| H | -7.225964 | -1.182446 | -2.108011 |
| H | -4.868515 | 0.542714  | 2.178622  |
| H | -5.438681 | 0.874542  | -1.590745 |
| H | -7.084895 | 0.531715  | 0.972784  |
| H | -6.041327 | 1.881720  | 0.546438  |
| C | -3.984517 | -1.952981 | -1.014533 |
| H | -4.345392 | -2.483929 | -0.125543 |
| H | -3.256941 | -2.615194 | -1.497085 |
| C | -5.167935 | -1.725076 | -1.977751 |
| H | -4.822223 | -1.138986 | -2.840119 |
| H | -5.457886 | -2.707728 | -2.369553 |
| C | -2.801732 | 1.336092  | 0.392189  |
| C | -2.107430 | -0.141810 | -1.212372 |

|   |           |           |           |
|---|-----------|-----------|-----------|
| C | -1.835141 | 1.141972  | -0.635039 |
| C | -0.734070 | 2.040443  | -0.990459 |
| C | -0.039463 | 1.883024  | -2.206287 |
| C | -0.298782 | 3.045470  | -0.115077 |
| C | 1.055288  | 2.672469  | -2.516417 |
| H | -0.361716 | 1.129549  | -2.918178 |
| C | 0.799823  | 3.847598  | -0.411715 |
| H | -0.805189 | 3.190420  | 0.834410  |
| C | 1.495625  | 3.655237  | -1.614099 |
| H | 1.597836  | 2.542741  | -3.446438 |
| H | 1.114009  | 4.601286  | 0.299583  |
| H | -1.544595 | -0.617821 | -2.003220 |
| H | -2.881820 | 2.205025  | 1.031347  |
| O | 2.589867  | 4.355808  | -1.991860 |
| C | 3.154772  | 5.278140  | -1.068475 |
| H | 2.457221  | 6.093405  | -0.839110 |
| H | 3.450950  | 4.774629  | -0.139786 |
| H | 4.039428  | 5.684628  | -1.559199 |

### TS2'-3

B3LYP-D3 SCF energy (au): -1951.32559768  
 B3LYP-D3 enthalpy (au): -1950.68946168  
 B3LYP-D3 free energy (au): -1950.80000068  
 M06 SCF energy in toluene (au): -1950.51843008  
 M06 enthalpy in toluene (au): -1949.88229408  
 M06 free energy in toluene (au): -1949.99283308  
 M06 free energy in toluene (quasi-harmonic) (au): -1949.98505740

### Cartesian coordinates

| ATOMX | Y         | Z         |           |
|-------|-----------|-----------|-----------|
| Fe    | 1.659058  | -0.454294 | -1.062527 |
| C     | 1.930162  | -2.205657 | -1.010424 |
| O     | 2.169607  | -3.331843 | -0.973459 |
| C     | 1.770009  | -0.319119 | -2.817403 |
| O     | 1.853804  | -0.185540 | -3.959262 |
| C     | -0.465520 | -0.568502 | -1.417286 |
| H     | -0.744073 | -1.069388 | -2.343999 |
| H     | -0.713426 | 0.488106  | -1.396942 |
| C     | -0.638210 | -1.310472 | -0.228326 |
| H     | -0.505751 | -0.798475 | 0.713562  |
| C     | -1.167098 | -2.610655 | -0.113736 |
| H     | -1.440126 | -3.089012 | -1.056988 |
| C     | -0.722531 | -3.564754 | 0.973907  |
| H     | -0.471131 | -3.030954 | 1.890164  |
| H     | -1.505988 | -4.292754 | 1.210571  |
| H     | 0.158071  | -4.126854 | 0.637007  |
| C     | -2.957728 | -1.846562 | 0.551339  |
| O     | -2.784393 | -0.912025 | 1.458764  |
| B     | -2.303785 | -1.185031 | 2.862713  |
| F     | -2.825582 | -0.178648 | 3.649939  |

|   |           |           |           |
|---|-----------|-----------|-----------|
| F | -2.685113 | -2.459573 | 3.241343  |
| F | -0.873880 | -1.090138 | 2.852690  |
| H | -3.247096 | -2.834654 | 0.920120  |
| C | -3.601929 | -1.393567 | -0.704756 |
| C | -4.108300 | -2.323551 | -1.622642 |
| C | -3.676149 | -0.024886 | -1.000778 |
| C | -4.675669 | -1.895016 | -2.820534 |
| H | -4.057233 | -3.385260 | -1.392529 |
| C | -4.243986 | 0.401004  | -2.200095 |
| H | -3.298001 | 0.686525  | -0.276406 |
| C | -4.742227 | -0.529799 | -3.114141 |
| H | -5.070611 | -2.623255 | -3.523279 |
| H | -4.297765 | 1.464037  | -2.420767 |
| H | -5.185347 | -0.195746 | -4.048177 |
| C | 3.101144  | -0.165602 | 0.489105  |
| C | 3.387783  | 0.666959  | -0.632056 |
| C | 6.195923  | 0.222199  | 1.374306  |
| C | 4.696085  | 0.710892  | -1.357973 |
| C | 5.785857  | 1.610376  | 0.824578  |
| C | 5.667656  | 1.717338  | -0.704452 |
| H | 5.141014  | -0.290217 | -1.354986 |
| H | 6.665577  | -0.374888 | 0.579442  |
| H | 6.523797  | 2.355779  | 1.143344  |
| H | 6.974834  | 0.363486  | 2.132596  |
| H | 4.545310  | 0.981262  | -2.409268 |
| H | 4.838519  | 1.918899  | 1.284935  |
| H | 6.657285  | 1.583247  | -1.160176 |
| H | 5.343955  | 2.735676  | -0.955901 |
| C | 4.014836  | -1.198151 | 1.085653  |
| H | 4.522535  | -1.758407 | 0.291356  |
| H | 3.409050  | -1.922369 | 1.641495  |
| C | 5.075819  | -0.602257 | 2.034196  |
| H | 4.573899  | 0.011003  | 2.794534  |
| H | 5.536210  | -1.441518 | 2.570054  |
| C | 2.278665  | 1.569450  | -0.785487 |
| C | 1.812241  | 0.197537  | 0.986917  |
| C | 1.316573  | 1.316267  | 0.234592  |
| C | 0.039059  | 2.004495  | 0.428806  |
| C | -0.792839 | 1.690744  | 1.520579  |
| C | -0.424665 | 2.949145  | -0.500648 |
| C | -2.041274 | 2.273277  | 1.665900  |
| H | -0.494315 | 0.950210  | 2.250590  |
| C | -1.672841 | 3.549043  | -0.364529 |
| H | 0.183607  | 3.211531  | -1.361076 |
| C | -2.493573 | 3.205754  | 0.722263  |
| H | -2.687094 | 1.969333  | 2.481318  |
| H | -1.999203 | 4.268075  | -1.106105 |
| H | 1.311390  | -0.276585 | 1.820569  |
| H | 2.215945  | 2.340973  | -1.540792 |
| O | -3.736389 | 3.711007  | 0.931524  |

|   |           |          |           |
|---|-----------|----------|-----------|
| C | -4.274573 | 4.597201 | -0.035481 |
| H | -5.276657 | 4.848715 | 0.314397  |
| H | -3.677380 | 5.514610 | -0.119183 |
| H | -4.342455 | 4.119332 | -1.021987 |

#### TS2-4

B3LYP-D3 SCF energy (au): -1951.32403383  
 B3LYP-D3 enthalpy (au): -1950.68742283  
 B3LYP-D3 free energy (au): -1950.79902883  
 M06 SCF energy in toluene (au): -1950.51613599  
 M06 enthalpy in toluene (au): -1949.87952499  
 M06 free energy in toluene (au): -1949.99113099  
 M06 free energy in toluene (quasi-harmonic) (au): -1949.98280816

#### Cartesian coordinates

| ATOMX | Y         | Z         |           |
|-------|-----------|-----------|-----------|
| Fe    | -1.396454 | -0.788113 | 1.146874  |
| C     | -0.749789 | -2.415116 | 1.402269  |
| O     | -0.373410 | -3.493818 | 1.554124  |
| C     | -1.674015 | -0.453207 | 2.853111  |
| O     | -1.874729 | -0.206135 | 3.961351  |
| C     | 0.493011  | 0.176949  | 1.502602  |
| H     | 0.914578  | -0.110967 | 2.466973  |
| H     | 0.226464  | 1.229729  | 1.436573  |
| C     | 1.096471  | -0.405516 | 0.355861  |
| H     | 0.835140  | 0.011979  | -0.604635 |
| C     | 2.059602  | -1.420485 | 0.309648  |
| H     | 2.397502  | -1.817640 | 1.267912  |
| C     | 2.102726  | -2.388744 | -0.846183 |
| H     | 1.851131  | -1.883683 | -1.781000 |
| H     | 3.096121  | -2.839151 | -0.946291 |
| H     | 1.386055  | -3.204188 | -0.679871 |
| C     | 3.565299  | -0.061030 | -0.283609 |
| O     | 3.500547  | 0.006141  | -1.585446 |
| B     | 2.603029  | 1.007184  | -2.296909 |
| F     | 3.222247  | 1.351480  | -3.463812 |
| F     | 1.357858  | 0.358813  | -2.547211 |
| F     | 2.385124  | 2.089318  | -1.440333 |
| H     | 3.239754  | 0.817643  | 0.272542  |
| C     | 4.701082  | -0.809735 | 0.295566  |
| C     | 5.508434  | -1.617951 | -0.516522 |
| C     | 4.979813  | -0.709886 | 1.667018  |
| C     | 6.573101  | -2.323823 | 0.041933  |
| H     | 5.300112  | -1.660952 | -1.579625 |
| C     | 6.042831  | -1.416081 | 2.220990  |
| H     | 4.356804  | -0.075613 | 2.293438  |
| C     | 6.840664  | -2.228720 | 1.408979  |
| H     | 7.199475  | -2.944520 | -0.592464 |
| H     | 6.255133  | -1.330992 | 3.282893  |
| H     | 7.671993  | -2.778548 | 1.840934  |



|   |           |           |           |
|---|-----------|-----------|-----------|
| C | -2.378308 | -1.432705 | -0.662657 |
| C | -3.328006 | -1.137833 | 0.371948  |
| C | -4.692342 | -3.208049 | -2.079208 |
| C | -4.389196 | -2.076723 | 0.854725  |
| C | -5.450154 | -1.979982 | -1.517681 |
| C | -5.672820 | -1.967552 | 0.003417  |
| H | -4.004806 | -3.102056 | 0.814956  |
| H | -4.722021 | -4.033954 | -1.353976 |
| H | -6.438451 | -1.920932 | -1.988493 |
| H | -5.227940 | -3.575112 | -2.962448 |
| H | -4.630380 | -1.876513 | 1.904935  |
| H | -4.927357 | -1.062067 | -1.815588 |
| H | -6.342295 | -2.791289 | 0.283709  |
| H | -6.193926 | -1.038283 | 0.268336  |
| C | -2.214760 | -2.746103 | -1.373188 |
| H | -2.297794 | -3.576206 | -0.661539 |
| H | -1.201876 | -2.790484 | -1.788716 |
| C | -3.234785 | -2.963348 | -2.509744 |
| H | -3.197478 | -2.106043 | -3.195079 |
| H | -2.895003 | -3.833276 | -3.085328 |
| C | -3.192471 | 0.253788  | 0.676569  |
| C | -1.654753 | -0.245438 | -0.943445 |
| C | -2.157899 | 0.823875  | -0.124685 |
| C | -1.686447 | 2.211213  | -0.105335 |
| C | -0.546051 | 2.593832  | -0.837643 |
| C | -2.326634 | 3.184834  | 0.673775  |
| C | -0.056270 | 3.887596  | -0.773634 |
| H | -0.014001 | 1.882609  | -1.455309 |
| C | -1.854171 | 4.493799  | 0.734115  |
| H | -3.213474 | 2.928713  | 1.245868  |
| C | -0.707722 | 4.850985  | 0.009604  |
| H | 0.845112  | 4.153269  | -1.313053 |
| H | -2.379718 | 5.219269  | 1.343258  |
| H | -0.870944 | -0.162627 | -1.683549 |
| H | -3.777629 | 0.778128  | 1.420447  |
| O | -0.156849 | 6.093981  | 0.006803  |
| C | -0.771435 | 7.101386  | 0.792543  |
| H | -1.801443 | 7.294614  | 0.464980  |
| H | -0.776153 | 6.833709  | 1.857400  |
| H | -0.171597 | 8.001234  | 0.648363  |

#### TS2'-4

B3LYP-D3 SCF energy (au): -1951.31990610

B3LYP-D3 enthalpy (au): -1950.68432110

B3LYP-D3 free energy (au): -1950.79540810

M06 SCF energy in toluene (au): -1950.51644880

M06 enthalpy in toluene (au): -1949.88086380

M06 free energy in toluene (au): -1949.99195080

M06 free energy in toluene (quasi-harmonic) (au): -1949.98411470

Cartesian coordinates

| ATOMX | Y         | Z         |           |
|-------|-----------|-----------|-----------|
| Fe    | -1.623488 | -0.922761 | 0.445406  |
| C     | -1.187758 | -2.379669 | -0.464716 |
| O     | -0.966518 | -3.326489 | -1.083466 |
| C     | -1.647685 | -1.694614 | 2.032161  |
| O     | -1.693465 | -2.173605 | 3.079082  |
| C     | 0.395698  | -0.415837 | 1.008127  |
| H     | 0.831630  | -1.174298 | 1.656759  |
| H     | 0.259795  | 0.541507  | 1.494706  |
| C     | 0.883683  | -0.398889 | -0.314715 |
| H     | 0.675430  | 0.483893  | -0.911309 |
| C     | 1.761687  | -1.361410 | -0.855268 |
| H     | 1.812949  | -2.299117 | -0.302058 |
| C     | 1.865115  | -1.502793 | -2.357210 |
| H     | 1.909711  | -0.519609 | -2.841181 |
| H     | 2.756839  | -2.068448 | -2.642827 |
| H     | 0.998820  | -2.040249 | -2.765236 |
| C     | 3.533418  | -0.582308 | -0.225714 |
| O     | 3.424200  | 0.036547  | 0.929113  |
| B     | 3.126488  | 1.524654  | 0.951245  |
| F     | 2.580995  | 1.868564  | -0.301774 |
| F     | 2.219412  | 1.751018  | 1.982816  |
| F     | 4.304659  | 2.225958  | 1.156440  |
| H     | 3.663628  | 0.047913  | -1.106572 |
| C     | 4.338458  | -1.829396 | -0.199962 |
| C     | 5.027535  | -2.256659 | -1.342590 |
| C     | 4.426356  | -2.587933 | 0.977098  |
| C     | 5.775362  | -3.434318 | -1.317814 |
| H     | 4.997338  | -1.651019 | -2.244006 |
| C     | 5.170297  | -3.763410 | 0.999422  |
| H     | 3.917401  | -2.229865 | 1.865679  |
| C     | 5.842563  | -4.193856 | -0.149448 |
| H     | 6.311914  | -3.752141 | -2.207318 |
| H     | 5.234681  | -4.344318 | 1.915315  |
| H     | 6.424692  | -5.110831 | -0.128505 |
| C     | -3.397878 | -0.657783 | -0.680741 |
| C     | -3.621482 | -0.277205 | 0.670784  |
| C     | -6.615371 | -0.980210 | -0.958767 |
| C     | -4.704795 | -0.825307 | 1.546859  |
| C     | -6.436761 | 0.266292  | -0.057994 |
| C     | -6.007424 | -0.010959 | 1.391857  |
| H     | -4.887284 | -1.872521 | 1.282180  |
| H     | -6.740066 | -1.879304 | -0.338389 |
| H     | -7.384048 | 0.816223  | -0.013189 |
| H     | -7.553923 | -0.877062 | -1.515774 |
| H     | -4.395328 | -0.817004 | 2.597572  |
| H     | -5.719265 | 0.953425  | -0.524492 |
| H     | -6.808606 | -0.547571 | 1.916183  |
| H     | -5.886423 | 0.950480  | 1.907035  |

|   |           |           |           |
|---|-----------|-----------|-----------|
| C | -4.148583 | -1.712013 | -1.443982 |
| H | -4.313089 | -2.589819 | -0.807313 |
| H | -3.527180 | -2.050524 | -2.280999 |
| C | -5.505761 | -1.229817 | -1.996288 |
| H | -5.349570 | -0.315233 | -2.584579 |
| H | -5.859273 | -1.993203 | -2.700784 |
| C | -2.743100 | 0.820821  | 0.967168  |
| C | -2.380832 | 0.210903  | -1.206694 |
| C | -2.026847 | 1.178608  | -0.215572 |
| C | -1.071342 | 2.267748  | -0.379923 |
| C | -0.687348 | 2.695147  | -1.667330 |
| C | -0.460519 | 2.880106  | 0.725006  |
| C | 0.302184  | 3.646518  | -1.836379 |
| H | -1.168964 | 2.270368  | -2.543132 |
| C | 0.543764  | 3.823428  | 0.568782  |
| H | -0.727332 | 2.573234  | 1.731101  |
| C | 0.963931  | 4.181373  | -0.718348 |
| H | 0.621160  | 3.960268  | -2.824563 |
| H | 1.056113  | 4.196447  | 1.444869  |
| H | -1.986094 | 0.163800  | -2.212272 |
| H | -2.699210 | 1.340921  | 1.914311  |
| O | 1.987579  | 5.021260  | -0.981027 |
| C | 2.920954  | 5.291095  | 0.068650  |
| H | 3.347514  | 4.362087  | 0.459065  |
| H | 3.704554  | 5.895704  | -0.390610 |
| H | 2.454647  | 5.866899  | 0.877844  |

## TS2

B3LYP-D3 SCF energy (au): -1951.32264171  
 B3LYP-D3 enthalpy (au): -1950.68680871  
 B3LYP-D3 free energy (au): -1950.79862871  
 M06 SCF energy in toluene (au): -1950.52309207  
 M06 enthalpy in toluene (au): -1949.88725907  
 M06 free energy in toluene (au): -1949.99907907  
 M06 free energy in toluene (quasi-harmonic) (au): -1949.99074936  
 $\omega$ B97X-D SCF energy in toluene (au): -3091.190516  
 $\omega$ B97X-D enthalpy in toluene (au): -3090.554683  
 $\omega$ B97X-D free energy in toluene (au): -3090.666503  
 $\omega$ B97X-D free energy in toluene (quasi-harmonic) (au): -3090.658173  
 DLPNO-CCSD(T) SCF energy in toluene (au): -3087.118356  
 DLPNO-CCSD(T) enthalpy in toluene (au): -3086.482523  
 DLPNO-CCSD(T) free energy in toluene (au): -3086.594343  
 DLPNO-CCSD(T) free energy in toluene (quasi-harmonic) (au): -3086.586013

## Cartesian coordinates

| ATOMX | Y        | Z         |           |
|-------|----------|-----------|-----------|
| Fe    | 1.618082 | -0.588654 | -0.531589 |
| C     | 1.755361 | -2.177682 | 0.257108  |
| O     | 1.910997 | -3.173703 | 0.807705  |
| C     | 1.762787 | -1.216582 | -2.179047 |

|   |           |           |           |
|---|-----------|-----------|-----------|
| O | 1.876950  | -1.576388 | -3.265847 |
| C | -0.477865 | -0.800790 | -0.876292 |
| H | -0.660880 | -1.754252 | -1.361475 |
| H | -0.724707 | 0.079487  | -1.465984 |
| C | -0.823604 | -0.740825 | 0.494007  |
| H | -0.965853 | 0.249636  | 0.920648  |
| C | -1.169108 | -1.825199 | 1.318686  |
| H | -0.854232 | -2.812479 | 0.997951  |
| C | -1.218807 | -1.625683 | 2.814614  |
| H | -1.604583 | -0.633387 | 3.076110  |
| H | -1.854497 | -2.377350 | 3.296548  |
| H | -0.217368 | -1.725554 | 3.256328  |
| C | -3.013813 | -2.103660 | 0.610828  |
| O | -2.892094 | -2.624021 | -0.583277 |
| B | -2.276013 | -4.020130 | -0.753055 |
| F | -2.387908 | -4.691382 | 0.462348  |
| F | -2.942791 | -4.626756 | -1.782820 |
| F | -0.910257 | -3.814389 | -1.058581 |
| H | -3.220721 | -2.799019 | 1.429158  |
| C | -3.709381 | -0.790721 | 0.678563  |
| C | -4.174759 | -0.290080 | 1.901180  |
| C | -3.866490 | -0.020246 | -0.481846 |
| C | -4.749102 | 0.978963  | 1.972105  |
| H | -4.085296 | -0.897303 | 2.797617  |
| C | -4.445094 | 1.243706  | -0.408124 |
| H | -3.531590 | -0.432867 | -1.426422 |
| C | -4.878060 | 1.754319  | 0.818367  |
| H | -5.102620 | 1.359282  | 2.926568  |
| H | -4.562416 | 1.833079  | -1.313098 |
| H | -5.307941 | 2.749476  | 0.872356  |
| C | 3.108459  | 0.211581  | 0.771254  |
| C | 3.403793  | 0.540392  | -0.582122 |
| C | 6.239976  | 0.763400  | 1.425892  |
| C | 4.696824  | 0.242937  | -1.275524 |
| C | 5.875386  | 1.854702  | 0.389847  |
| C | 5.723994  | 1.375662  | -1.063083 |
| H | 5.099800  | -0.700612 | -0.891730 |
| H | 6.666865  | -0.112541 | 0.917002  |
| H | 6.651850  | 2.628629  | 0.394764  |
| H | 7.040559  | 1.146378  | 2.069444  |
| H | 4.533374  | 0.096720  | -2.349070 |
| H | 4.953076  | 2.360662  | 0.703276  |
| H | 6.695809  | 1.031286  | -1.439654 |
| H | 5.436664  | 2.235285  | -1.682379 |
| C | 3.995338  | -0.555270 | 1.711011  |
| H | 4.459571  | -1.398736 | 1.186499  |
| H | 3.375793  | -0.988775 | 2.504244  |
| C | 5.101730  | 0.304825  | 2.355496  |
| H | 4.644114  | 1.185098  | 2.827500  |
| H | 5.539805  | -0.288265 | 3.167934  |

|   |           |          |           |
|---|-----------|----------|-----------|
| C | 2.325399  | 1.356416 | -1.070769 |
| C | 1.841199  | 0.791635 | 1.095120  |
| C | 1.373715  | 1.547388 | -0.031005 |
| C | 0.143091  | 2.340567 | -0.104510 |
| C | -0.518046 | 2.757302 | 1.067129  |
| C | -0.421587 | 2.699763 | -1.335511 |
| C | -1.692388 | 3.488833 | 1.008508  |
| H | -0.099815 | 2.508907 | 2.037742  |
| C | -1.598017 | 3.441392 | -1.410720 |
| H | 0.050804  | 2.378198 | -2.258720 |
| C | -2.243898 | 3.837799 | -0.233253 |
| H | -2.208198 | 3.799762 | 1.910061  |
| H | -2.007191 | 3.688142 | -2.382644 |
| H | 1.344960  | 0.699766 | 2.050994  |
| H | 2.275807  | 1.788477 | -2.061179 |
| O | -3.396527 | 4.555105 | -0.189818 |
| C | -3.984308 | 4.956193 | -1.419029 |
| H | -4.878807 | 5.520175 | -1.152008 |
| H | -3.305661 | 5.597464 | -1.995391 |
| H | -4.268918 | 4.089448 | -2.028299 |

### TS2'

B3LYP-D3 SCF energy (au): -1951.31521489  
 B3LYP-D3 enthalpy (au): -1950.67902589  
 B3LYP-D3 free energy (au): -1950.79133989  
 M06 SCF energy in toluene (au): -1950.52275628  
 M06 enthalpy in toluene (au): -1949.88656728  
 M06 free energy in toluene (au): -1949.99888128  
 M06 free energy in toluene (quasi-harmonic) (au): -1949.99035439  
 $\omega$ B97X-D SCF energy in toluene (au): -3091.190119  
 $\omega$ B97X-D enthalpy in toluene (au): -3090.55393  
 $\omega$ B97X-D free energy in toluene (au): -3090.666244  
 $\omega$ B97X-D free energy in toluene (quasi-harmonic) (au): -3090.657717  
 DLPNO-CCSD(T) SCF energy in toluene (au): -3087.116959  
 DLPNO-CCSD(T) enthalpy in toluene (au): -3086.48077  
 DLPNO-CCSD(T) free energy in toluene (au): -3086.593084  
 DLPNO-CCSD(T) free energy in toluene (quasi-harmonic) (au): -3086.584557

### Cartesian coordinates

| ATOMX | Y         | Z         |           |
|-------|-----------|-----------|-----------|
| Fe    | -1.781406 | -0.649218 | 0.751341  |
| C     | -1.609234 | -2.292289 | 0.085634  |
| O     | -1.555106 | -3.338973 | -0.383148 |
| C     | -2.161955 | -1.164677 | 2.398549  |
| O     | -2.432900 | -1.458261 | 3.478345  |
| C     | 0.241237  | -0.604099 | 1.445864  |
| H     | 0.443098  | -1.512041 | 2.014449  |
| H     | 0.283572  | 0.307831  | 2.038359  |
| C     | 0.821397  | -0.551168 | 0.154306  |
| H     | 0.898548  | 0.427810  | -0.311552 |

|   |           |           |           |
|---|-----------|-----------|-----------|
| C | 1.424211  | -1.626538 | -0.519369 |
| H | 1.183492  | -2.614631 | -0.136463 |
| C | 1.594379  | -1.575505 | -2.019213 |
| H | 2.321235  | -2.331104 | -2.325270 |
| H | 0.645264  | -1.805891 | -2.521804 |
| H | 1.932788  | -0.588363 | -2.355423 |
| C | 3.186386  | -1.620611 | 0.237645  |
| O | 3.755920  | -2.681273 | -0.286770 |
| B | 3.241232  | -4.077639 | 0.113050  |
| F | 4.341131  | -4.886104 | 0.231764  |
| F | 2.530886  | -3.940451 | 1.316389  |
| F | 2.377543  | -4.473805 | -0.908804 |
| H | 2.880304  | -1.712429 | 1.282558  |
| C | 3.837068  | -0.322202 | -0.112027 |
| C | 3.647363  | 0.807319  | 0.694782  |
| C | 4.662359  | -0.228475 | -1.238590 |
| C | 4.275110  | 2.012084  | 0.385049  |
| H | 3.015109  | 0.737436  | 1.576333  |
| C | 5.284192  | 0.978951  | -1.555125 |
| H | 4.823728  | -1.117457 | -1.837582 |
| C | 5.095997  | 2.099493  | -0.743446 |
| H | 4.132104  | 2.876927  | 1.025223  |
| H | 5.930361  | 1.040504  | -2.426486 |
| H | 5.605683  | 3.030925  | -0.976231 |
| C | -3.130344 | -0.155621 | -0.819368 |
| C | -3.664683 | 0.269507  | 0.429346  |
| C | -5.610513 | 0.809340  | -2.108339 |
| C | -4.983544 | -0.142550 | 1.018800  |
| C | -6.575292 | 0.285868  | -1.016391 |
| C | -6.194441 | 0.616840  | 0.438034  |
| H | -5.133980 | -1.219439 | 0.875351  |
| H | -6.194232 | 1.275637  | -2.910519 |
| H | -6.706516 | -0.800825 | -1.118380 |
| H | -4.989566 | 1.612728  | -1.691111 |
| H | -4.950450 | 0.021489  | 2.102138  |
| H | -7.567582 | 0.717582  | -1.191047 |
| H | -7.055992 | 0.390889  | 1.078697  |
| H | -6.017892 | 1.697511  | 0.527990  |
| C | -3.829287 | -1.059155 | -1.787595 |
| H | -4.451613 | -1.770751 | -1.234628 |
| H | -3.105092 | -1.651782 | -2.356457 |
| C | -4.705736 | -0.246174 | -2.764513 |
| H | -4.053304 | 0.257596  | -3.489170 |
| H | -5.320129 | -0.952870 | -3.336548 |
| C | -2.755023 | 1.242266  | 0.974390  |
| C | -1.894173 | 0.536582  | -1.028048 |
| C | -1.684779 | 1.446195  | 0.059290  |
| C | -0.572805 | 2.388453  | 0.203608  |
| C | 0.139375  | 2.823031  | -0.922609 |
| C | -0.177700 | 2.876802  | 1.463312  |

|   |           |          |           |
|---|-----------|----------|-----------|
| C | 1.213585  | 3.701626 | -0.812547 |
| H | -0.151925 | 2.475170 | -1.908877 |
| C | 0.890325  | 3.749779 | 1.588605  |
| H | -0.703007 | 2.551622 | 2.356353  |
| C | 1.598692  | 4.167227 | 0.450397  |
| H | 1.744777  | 4.004952 | -1.705604 |
| H | 1.205407  | 4.119124 | 2.558712  |
| H | -1.250020 | 0.413111 | -1.887440 |
| H | -2.898443 | 1.771246 | 1.907166  |
| O | 2.637893  | 5.009980 | 0.676831  |
| C | 3.372606  | 5.482048 | -0.446947 |
| H | 2.731718  | 6.062981 | -1.121861 |
| H | 4.153360  | 6.126418 | -0.041262 |
| H | 3.828454  | 4.651318 | -0.996839 |

### TS3

B3LYP-D3 SCF energy (au): -1307.05476723  
 B3LYP-D3 enthalpy (au): -1306.39391123  
 B3LYP-D3 free energy (au): -1306.49724023  
 M06 SCF energy in toluene (au): -1306.40360341  
 M06 enthalpy in toluene (au): -1305.74274741  
 M06 free energy in toluene (au): -1305.84607641  
 M06 free energy in toluene (quasi-harmonic) (au): -1305.84002618  
 M06 SCF energy in dichloromethane (au): -1306.422865  
 M06 enthalpy in dichloromethane (au): -1305.762009  
 M06 free energy in dichloromethane (au): -1305.865338  
 M06 free energy in dichloromethane (quasi-harmonic) (au): -1305.859288

### Cartesian coordinates

| ATOMX | Y         | Z         |           |
|-------|-----------|-----------|-----------|
| C     | -2.557948 | -1.647413 | -0.532540 |
| C     | -2.884664 | -0.621437 | -1.469590 |
| C     | -3.961134 | 0.160693  | -0.902127 |
| C     | -4.260480 | -0.368947 | 0.385380  |
| C     | -3.362580 | -1.473080 | 0.634069  |
| Fe    | -2.250434 | 0.323386  | 0.347496  |
| C     | -2.424776 | 0.919076  | 2.007640  |
| O     | -2.560491 | 1.272142  | 3.093713  |
| C     | -1.823848 | 1.884149  | -0.386378 |
| O     | -1.597485 | 2.890063  | -0.898114 |
| C     | -3.370351 | -2.375494 | 1.830955  |
| H     | -4.028740 | -3.237293 | 1.663360  |
| H     | -2.370251 | -2.764192 | 2.045149  |
| H     | -3.726340 | -1.858781 | 2.726066  |
| C     | -1.598280 | -2.778456 | -0.743447 |
| H     | -0.893582 | -2.892636 | 0.086728  |
| H     | -2.155086 | -3.720159 | -0.819252 |
| H     | -1.027942 | -2.664757 | -1.668023 |
| C     | -2.338911 | -0.465489 | -2.857847 |
| H     | -1.315525 | -0.840734 | -2.937679 |

|   |           |           |           |
|---|-----------|-----------|-----------|
| H | -2.952742 | -1.020215 | -3.578509 |
| H | -2.330936 | 0.581818  | -3.171194 |
| C | -4.702354 | 1.264592  | -1.595129 |
| H | -5.546116 | 0.852153  | -2.162153 |
| H | -5.104920 | 1.989249  | -0.882777 |
| H | -4.065599 | 1.804517  | -2.300556 |
| C | -5.371527 | 0.081090  | 1.285485  |
| H | -6.294882 | -0.454903 | 1.033333  |
| H | -5.152553 | -0.119254 | 2.337224  |
| H | -5.570339 | 1.150683  | 1.179459  |
| C | -0.255972 | -0.178687 | 0.966291  |
| H | 0.102331  | 0.530065  | 1.712463  |
| H | -0.395738 | -1.181612 | 1.363492  |
| C | 0.313427  | -0.054365 | -0.322724 |
| H | 0.152454  | -0.883823 | -1.009719 |
| C | 1.146683  | 0.979621  | -0.793829 |
| H | 2.407399  | 0.484255  | -0.534553 |
| N | 3.759443  | 0.201758  | -0.460682 |
| C | 4.440783  | 1.134961  | 0.512331  |
| C | 3.986072  | -1.288175 | -0.368214 |
| C | 5.928873  | 0.751076  | 0.639892  |
| C | 4.319654  | 2.540851  | -0.093221 |
| C | 3.729613  | 1.114271  | 1.873247  |
| C | 5.494194  | -1.569801 | -0.224650 |
| C | 3.462858  | -1.872159 | -1.688463 |
| C | 3.192244  | -1.900933 | 0.795983  |
| C | 6.150319  | -0.743937 | 0.885830  |
| H | 6.376108  | 1.349317  | 1.441791  |
| H | 6.443599  | 1.036855  | -0.288149 |
| H | 3.276910  | 2.865322  | -0.161642 |
| H | 4.855438  | 3.259926  | 0.533133  |
| H | 4.763499  | 2.583079  | -1.095489 |
| H | 4.083844  | 1.959017  | 2.471462  |
| H | 2.646701  | 1.216023  | 1.755377  |
| H | 3.927208  | 0.206496  | 2.443925  |
| H | 5.987911  | -1.339381 | -1.179265 |
| H | 5.635168  | -2.642645 | -0.049851 |
| H | 3.654620  | -2.948611 | -1.720625 |
| H | 2.384368  | -1.716825 | -1.796347 |
| H | 3.964670  | -1.421028 | -2.553004 |
| H | 2.157477  | -1.550600 | 0.805623  |
| H | 3.181496  | -2.989063 | 0.678955  |
| H | 3.631882  | -1.685197 | 1.769958  |
| H | 5.756744  | -1.035637 | 1.866507  |
| H | 7.224165  | -0.955207 | 0.914695  |
| C | 1.217446  | 1.267074  | -2.288664 |
| H | 2.121933  | 1.832287  | -2.541071 |
| H | 1.233619  | 0.337152  | -2.870162 |
| H | 0.361799  | 1.859986  | -2.631326 |
| H | 1.156450  | 1.875273  | -0.164670 |



H 4.086448 0.476627 -1.389271
